# Supplementary material for: Controlling Neglected Tropical Diseases (NTDs) in Haiti: Implementation Strategies and Evidence of Their Success
Source: PLoS Negl Trop Dis. 2016 Oct 5;10(10):e0004954. doi: 10.1371/journal.pntd.0004954 (PMC5051938; doi:10.1371/journal.pntd.0004954)
Supplement: S1 Data — (XLSX) [file pntd.0004954.s001.xlsx]

## Sheet: MDA_KAP5_mchoice.xls
akey	KAPPOSOPEN	KAPPOST	KAPTEAM	KAPWILLDRINK	KAPWATER	KAPLABEL	KAPNAME	KAP_NOTES	KAPSEX	KAPPOSTTIMES	KAPEDU	KAPDRINKPOST	PAST3_MDA	KAPD2	HWMANYTIMESLST3YEARS	KAPOLD	KNOW_MDA	KAPCAL	KAPKNOWLF	KAPDRINK	KAPYEARS	KAPEFFECT	KAPDISTPOS	KAPD1	bkey	DNI1	DNI2	DNI3	DNI4	DNI5	ckey	KAPCause1	KAPCause2	KAPCause3	KAPCause4	KAPCause5	dkey	kapdrink2day1	kapdrink2day2	kapdrink2day3	kapdrink2day4	kapdrink2day5	ekey	kappreventlf1	kappreventlf2	kappreventlf3	kappreventlf4	kappreventlf5	fkey
uuid:00047ca6-23e4-4167-9393-7b81d96fb96d	yes	no	3	yes	yes	109	Fa	Gdg	female	1	No	post	yes	post	3	50	Yes	50_59	yes	yes	999	no	not_too_far	yes	uuid:00047ca6-23e4-4167-9393-7b81d96fb96d	pregnant					uuid:00047ca6-23e4-4167-9393-7b81d96fb96d	na					uuid:00047ca6-23e4-4167-9393-7b81d96fb96d	help_me					uuid:00047ca6-23e4-4167-9393-7b81d96fb96d	mosquito					uuid:00047ca6-23e4-4167-9393-7b81d96fb96d
uuid:000b6a91-22dd-4df3-a367-b73f246ce516	na_not_aware_of_post	no	1	yes	na	44	Ca		female	na	Some_secondary	na	no	na	0	25	Yes	18_29	yes	na	999	na	na_not_aware_post	no	uuid:000b6a91-22dd-4df3-a367-b73f246ce516	pregnant					uuid:000b6a91-22dd-4df3-a367-b73f246ce516	na					uuid:000b6a91-22dd-4df3-a367-b73f246ce516	na_already_convinced					uuid:000b6a91-22dd-4df3-a367-b73f246ce516	clean_water					uuid:000b6a91-22dd-4df3-a367-b73f246ce516
uuid:001a99f4-cb64-47a2-93f1-bde110fe9230	yes	no	1	yes	yes	2670	ng		female	na	No	post	dk	post	999	999	Yes	70_79	yes	yes	999	yes	not_too_far	yes	uuid:001a99f4-cb64-47a2-93f1-bde110fe9230	dk					uuid:001a99f4-cb64-47a2-93f1-bde110fe9230	action					uuid:001a99f4-cb64-47a2-93f1-bde110fe9230	na_already_convinced					uuid:001a99f4-cb64-47a2-93f1-bde110fe9230	iftreat					uuid:001a99f4-cb64-47a2-93f1-bde110fe9230
uuid:00343a19-0b30-4021-8d5e-8087ab8f4bfa	yes	no	1	yes	yes	39	Dc		male	na	Finish_primary	post	no	school	0	72	Yes	70_79	yes	yes	3	no	not_too_far	yes	uuid:00343a19-0b30-4021-8d5e-8087ab8f4bfa	pregnant					uuid:00343a19-0b30-4021-8d5e-8087ab8f4bfa	na					uuid:00343a19-0b30-4021-8d5e-8087ab8f4bfa	na_already_convinced					uuid:00343a19-0b30-4021-8d5e-8087ab8f4bfa	iftreat					uuid:00343a19-0b30-4021-8d5e-8087ab8f4bfa
uuid:004f16d7-ecce-4e22-8152-241161159bb6	yes	no	1	yes	yes	41	Mr		male	na	Primary	post	yes	post	2	40	Yes	40_49	yes	yes	999	no	close	yes	uuid:004f16d7-ecce-4e22-8152-241161159bb6	pregnant					uuid:004f16d7-ecce-4e22-8152-241161159bb6	na					uuid:004f16d7-ecce-4e22-8152-241161159bb6	na_already_convinced					uuid:004f16d7-ecce-4e22-8152-241161159bb6	clean_water					uuid:004f16d7-ecce-4e22-8152-241161159bb6
uuid:0060525e-4984-4993-accc-2313e2be69ce	yes	no	3	yes	yes	148	Ja	Bsvx	male	1	Finish_primary	post	no	post	2	23	Yes	18_29	yes	yes	999	yes	not_too_far	yes	uuid:0060525e-4984-4993-accc-2313e2be69ce	pregnant					uuid:0060525e-4984-4993-accc-2313e2be69ce	not_eat					uuid:0060525e-4984-4993-accc-2313e2be69ce	help_family					uuid:0060525e-4984-4993-accc-2313e2be69ce	iftreat					uuid:0060525e-4984-4993-accc-2313e2be69ce
uuid:00949b1e-8518-4c25-b6d6-c5b00b19d885	dk	dk	2	yes	na	57	md		female	na	Some_secondary	na	dk	na	999	22	Yes	18_29	yes	na	999	na	dk	no	uuid:00949b1e-8518-4c25-b6d6-c5b00b19d885	pregnant					uuid:00949b1e-8518-4c25-b6d6-c5b00b19d885	na					uuid:00949b1e-8518-4c25-b6d6-c5b00b19d885	side_effect					uuid:00949b1e-8518-4c25-b6d6-c5b00b19d885	clean_water					uuid:00949b1e-8518-4c25-b6d6-c5b00b19d885
uuid:00dc28f5-52ea-481d-b6ca-a33965efdab5	yes	no	2	dk	yes	931	mc		female	na	Primary	post	yes	post	1	34	Yes	30_39	yes	yes	999	yes	close	yes	uuid:00dc28f5-52ea-481d-b6ca-a33965efdab5	pregnant					uuid:00dc28f5-52ea-481d-b6ca-a33965efdab5	dk					uuid:00dc28f5-52ea-481d-b6ca-a33965efdab5	na_already_convinced					uuid:00dc28f5-52ea-481d-b6ca-a33965efdab5	bednets					uuid:00dc28f5-52ea-481d-b6ca-a33965efdab5
uuid:00ebd652-c03a-403f-8ee3-9dc92b16c67c	yes	no	3	yes	yes	123	Hl	Frjhf	male	1	Finish_primary	school	no	post	1	19	Yes	18_29	yes	yes	999	yes	close	yes	uuid:00ebd652-c03a-403f-8ee3-9dc92b16c67c	other					uuid:00ebd652-c03a-403f-8ee3-9dc92b16c67c	dk					uuid:00ebd652-c03a-403f-8ee3-9dc92b16c67c	side_effect					uuid:00ebd652-c03a-403f-8ee3-9dc92b16c67c	unknown					uuid:00ebd652-c03a-403f-8ee3-9dc92b16c67c
uuid:0124239b-efbe-42e6-9235-23c1e8ddede2	yes	no	2	yes	yes	2844	cv		male	na	No	post	yes	post	3	48	Yes	40_49	yes	yes	999	no	close	yes	uuid:0124239b-efbe-42e6-9235-23c1e8ddede2	dk					uuid:0124239b-efbe-42e6-9235-23c1e8ddede2	na					uuid:0124239b-efbe-42e6-9235-23c1e8ddede2	side_effect					uuid:0124239b-efbe-42e6-9235-23c1e8ddede2	unknown					uuid:0124239b-efbe-42e6-9235-23c1e8ddede2
uuid:0184dede-30ae-41fa-96cf-d33311a3ae5d	dk	dk	4	yes	na	212	J o	Ok	male	na	Primary	na	no	na	999	36	Yes	30_39	yes	na	999	na	dk	no	uuid:0184dede-30ae-41fa-96cf-d33311a3ae5d	dk					uuid:0184dede-30ae-41fa-96cf-d33311a3ae5d	na					uuid:0184dede-30ae-41fa-96cf-d33311a3ae5d	help_me					uuid:0184dede-30ae-41fa-96cf-d33311a3ae5d	unknown					uuid:0184dede-30ae-41fa-96cf-d33311a3ae5d
uuid:01af820e-6398-4e5e-abdf-61a64f2af064	dk	dk	5	yes	na	264	Ln		female	na	Primary	na	yes	na	2	27	Yes	18_29	yes	no	999	na	other	no	uuid:01af820e-6398-4e5e-abdf-61a64f2af064	pregnant					uuid:01af820e-6398-4e5e-abdf-61a64f2af064	na					uuid:01af820e-6398-4e5e-abdf-61a64f2af064	help_me					uuid:01af820e-6398-4e5e-abdf-61a64f2af064	bednets					uuid:01af820e-6398-4e5e-abdf-61a64f2af064
uuid:01d27143-7961-4292-9f03-45bf2872e8b1	yes	no	1	yes	yes	267	Dm		male	na	Primary	post	yes	post	2	42	Yes	40_49	yes	yes	999	no	not_too_far	yes	uuid:01d27143-7961-4292-9f03-45bf2872e8b1	other					uuid:01d27143-7961-4292-9f03-45bf2872e8b1	na					uuid:01d27143-7961-4292-9f03-45bf2872e8b1	na_already_convinced					uuid:01d27143-7961-4292-9f03-45bf2872e8b1	iftreat					uuid:01d27143-7961-4292-9f03-45bf2872e8b1
uuid:021619da-11c8-4983-ac69-653476092d83	yes	no	5	yes	yes	172	Mm		female	na	No	post	yes	post	3	18	Yes	18_29	yes	yes	999	no	close	yes	uuid:021619da-11c8-4983-ac69-653476092d83	pregnant					uuid:021619da-11c8-4983-ac69-653476092d83	na					uuid:021619da-11c8-4983-ac69-653476092d83	side_effect					uuid:021619da-11c8-4983-ac69-653476092d83	bednets					uuid:021619da-11c8-4983-ac69-653476092d83
uuid:02263aa2-8d48-4d6c-9501-86be9885a13d	yes	no	2	yes	yes	90	jl		male	na	Primary	post	yes	post	2	65	Yes	60_69	yes	yes	1	yes	far	yes	uuid:02263aa2-8d48-4d6c-9501-86be9885a13d	pregnant					uuid:02263aa2-8d48-4d6c-9501-86be9885a13d	worm					uuid:02263aa2-8d48-4d6c-9501-86be9885a13d	uk					uuid:02263aa2-8d48-4d6c-9501-86be9885a13d	clean_water					uuid:02263aa2-8d48-4d6c-9501-86be9885a13d
uuid:0259fd59-99a3-4193-82f1-94bcf28e7a63	yes	no	1	yes	yes	292	Ob		male	na	No	post	yes	post	3	40	Yes	40_49	yes	yes	999	no	close	yes	uuid:0259fd59-99a3-4193-82f1-94bcf28e7a63	pregnant					uuid:0259fd59-99a3-4193-82f1-94bcf28e7a63	na					uuid:0259fd59-99a3-4193-82f1-94bcf28e7a63	na_already_convinced					uuid:0259fd59-99a3-4193-82f1-94bcf28e7a63	clean_water					uuid:0259fd59-99a3-4193-82f1-94bcf28e7a63
uuid:029f2b52-b040-4deb-9f23-810c5967fce8	yes	no	5	yes	yes	430	Ld		female	na	No	post	yes	post	3	48	Yes	40_49	yes	yes	999	no	close	yes	uuid:029f2b52-b040-4deb-9f23-810c5967fce8	pregnant					uuid:029f2b52-b040-4deb-9f23-810c5967fce8	na					uuid:029f2b52-b040-4deb-9f23-810c5967fce8	side_effect					uuid:029f2b52-b040-4deb-9f23-810c5967fce8	clean_water					uuid:029f2b52-b040-4deb-9f23-810c5967fce8
uuid:02d8afca-7c6e-4e47-a780-e0efba1cac60	yes	no	5	yes	yes	272	Jj		female	na	No	post	yes	post	2	45	Yes	40_49	yes	yes	999	no	close	yes	uuid:02d8afca-7c6e-4e47-a780-e0efba1cac60	dk					uuid:02d8afca-7c6e-4e47-a780-e0efba1cac60	na					uuid:02d8afca-7c6e-4e47-a780-e0efba1cac60	help_family					uuid:02d8afca-7c6e-4e47-a780-e0efba1cac60	unknown					uuid:02d8afca-7c6e-4e47-a780-e0efba1cac60
uuid:03078a08-c6c4-4c82-b8ee-733e483eec16	yes	no	1	yes	yes	2627	Da		male	na	Some_secondary	post	no	post	0	79	Yes	70_79	yes	yes	999	yes	close	yes	uuid:03078a08-c6c4-4c82-b8ee-733e483eec16	pregnant					uuid:03078a08-c6c4-4c82-b8ee-733e483eec16	not_eat					uuid:03078a08-c6c4-4c82-b8ee-733e483eec16	na_already_convinced					uuid:03078a08-c6c4-4c82-b8ee-733e483eec16	iftreat					uuid:03078a08-c6c4-4c82-b8ee-733e483eec16
uuid:03228617-d122-4b44-8559-89c57e1fdca8	yes	no	5	yes	yes	263	Md		male	na	No	post	yes	post	3	65	Yes	60_69	yes	yes	999	no	close	yes	uuid:03228617-d122-4b44-8559-89c57e1fdca8	pregnant					uuid:03228617-d122-4b44-8559-89c57e1fdca8	na					uuid:03228617-d122-4b44-8559-89c57e1fdca8	help_me					uuid:03228617-d122-4b44-8559-89c57e1fdca8	clean_water					uuid:03228617-d122-4b44-8559-89c57e1fdca8
uuid:0378592b-52e2-4c63-ab13-86926ad7a39e	yes	no	1	yes	dk	296	Jd	Li pa konnen	female	na	No	home	yes	post	999	80	Yes	80_89	yes	yes	999	no	not_too_far	yes	uuid:0378592b-52e2-4c63-ab13-86926ad7a39e	dk					uuid:0378592b-52e2-4c63-ab13-86926ad7a39e	na					uuid:0378592b-52e2-4c63-ab13-86926ad7a39e	na_already_convinced					uuid:0378592b-52e2-4c63-ab13-86926ad7a39e	unknown					uuid:0378592b-52e2-4c63-ab13-86926ad7a39e
uuid:03a403d6-989a-4bfd-a50a-107a177ba6b1	yes	no	5	yes	yes	161	vp	lot moun yo pala	female	na	Primary	post	yes	na	3	32	Yes	30_39	yes	na	999	no	not_too_far	yes	uuid:03a403d6-989a-4bfd-a50a-107a177ba6b1	pregnant					uuid:03a403d6-989a-4bfd-a50a-107a177ba6b1	na					uuid:03a403d6-989a-4bfd-a50a-107a177ba6b1	na_already_convinced					uuid:03a403d6-989a-4bfd-a50a-107a177ba6b1	clean_water					uuid:03a403d6-989a-4bfd-a50a-107a177ba6b1
uuid:03b7be8b-ab3f-4925-9a70-bf6646e35545	yes	no	4	yes	yes	262	O j		female	na	Some_secondary	post	yes	post	1	33	Yes	30_39	yes	yes	999	no	not_too_far	yes	uuid:03b7be8b-ab3f-4925-9a70-bf6646e35545	pregnant					uuid:03b7be8b-ab3f-4925-9a70-bf6646e35545	na					uuid:03b7be8b-ab3f-4925-9a70-bf6646e35545	help_me					uuid:03b7be8b-ab3f-4925-9a70-bf6646e35545	unknown					uuid:03b7be8b-ab3f-4925-9a70-bf6646e35545
uuid:03d1adcf-1b3f-44bd-aa33-37c33546beb0	yes	dk	3	yes	yes	130	Sd	Bfj	female	1	Primary	post	no	post	2	21	Yes	18_29	yes	yes	999	no	not_too_far	yes	uuid:03d1adcf-1b3f-44bd-aa33-37c33546beb0	pregnant					uuid:03d1adcf-1b3f-44bd-aa33-37c33546beb0	na					uuid:03d1adcf-1b3f-44bd-aa33-37c33546beb0	side_effect					uuid:03d1adcf-1b3f-44bd-aa33-37c33546beb0	unknown					uuid:03d1adcf-1b3f-44bd-aa33-37c33546beb0
uuid:03d57422-95f2-4ab0-9175-9c4e57b89c22	yes	no	1	yes	yes	571	Ll		male	na	Primary	post	yes	post	999	67	Yes	60_69	yes	yes	999	yes	not_too_far	yes	uuid:03d57422-95f2-4ab0-9175-9c4e57b89c22	pregnant					uuid:03d57422-95f2-4ab0-9175-9c4e57b89c22	not_eat					uuid:03d57422-95f2-4ab0-9175-9c4e57b89c22	na_already_convinced					uuid:03d57422-95f2-4ab0-9175-9c4e57b89c22	clean_water					uuid:03d57422-95f2-4ab0-9175-9c4e57b89c22
uuid:03e20905-9553-4fd9-8828-1b4a0c2c4e4d	yes	no	1	yes	na	18	Cn	Y	female	na	Finish_primary	na	yes	na	1	20	Yes	18_29	yes	na	999	na	not_too_far	no	uuid:03e20905-9553-4fd9-8828-1b4a0c2c4e4d	pregnant					uuid:03e20905-9553-4fd9-8828-1b4a0c2c4e4d	na					uuid:03e20905-9553-4fd9-8828-1b4a0c2c4e4d	na_already_convinced					uuid:03e20905-9553-4fd9-8828-1b4a0c2c4e4d	unknown					uuid:03e20905-9553-4fd9-8828-1b4a0c2c4e4d
uuid:04637b6a-bec5-4990-b58f-7eb8862b47a7	yes	no	5	yes	yes	298	Mj		female	na	Finish_primary	post	yes	post	3	33	Yes	30_39	yes	yes	999	yes	close	yes	uuid:04637b6a-bec5-4990-b58f-7eb8862b47a7	pregnant					uuid:04637b6a-bec5-4990-b58f-7eb8862b47a7	dk					uuid:04637b6a-bec5-4990-b58f-7eb8862b47a7	help_family					uuid:04637b6a-bec5-4990-b58f-7eb8862b47a7	bednets					uuid:04637b6a-bec5-4990-b58f-7eb8862b47a7
uuid:048ff1bd-3329-44a8-92f7-2f58746675cc	yes	no	1	yes	yes	2637	Av		female	na	No	home	yes	post	2	43	Yes	40_49	yes	yes	999	no	close	yes	uuid:048ff1bd-3329-44a8-92f7-2f58746675cc	pregnant					uuid:048ff1bd-3329-44a8-92f7-2f58746675cc	na					uuid:048ff1bd-3329-44a8-92f7-2f58746675cc	na_already_convinced					uuid:048ff1bd-3329-44a8-92f7-2f58746675cc	iftreat					uuid:048ff1bd-3329-44a8-92f7-2f58746675cc
uuid:04a4e650-4c5a-450a-a364-d5593e158291	yes	dk	5	yes	yes	1028	Pr		female	na	No	post	yes	post	3	33	Yes	30_39	yes	yes	999	no	close	yes	uuid:04a4e650-4c5a-450a-a364-d5593e158291	pregnant					uuid:04a4e650-4c5a-450a-a364-d5593e158291	na					uuid:04a4e650-4c5a-450a-a364-d5593e158291	help_me					uuid:04a4e650-4c5a-450a-a364-d5593e158291	bednets					uuid:04a4e650-4c5a-450a-a364-d5593e158291
uuid:04b70da0-ff64-44bf-8956-38641d5caab5	yes	no	1	yes	yes	2601	ja		female	na	Primary	home	yes	post	2	45	Yes	40_49	yes	yes	999	yes	not_too_far	yes	uuid:04b70da0-ff64-44bf-8956-38641d5caab5	pregnant					uuid:04b70da0-ff64-44bf-8956-38641d5caab5	dk					uuid:04b70da0-ff64-44bf-8956-38641d5caab5	na_already_convinced					uuid:04b70da0-ff64-44bf-8956-38641d5caab5	unknown					uuid:04b70da0-ff64-44bf-8956-38641d5caab5
uuid:04c885ac-8e52-4507-a120-064eca75f8d2	yes	no	2	yes	yes	929	df		female	na	Some_secondary	post	yes	post	2	32	Yes	30_39	yes	yes	999	no	close	yes	uuid:04c885ac-8e52-4507-a120-064eca75f8d2	pregnant					uuid:04c885ac-8e52-4507-a120-064eca75f8d2	na					uuid:04c885ac-8e52-4507-a120-064eca75f8d2	na_already_convinced					uuid:04c885ac-8e52-4507-a120-064eca75f8d2	clean_water					uuid:04c885ac-8e52-4507-a120-064eca75f8d2
uuid:04c94a31-66ca-4fa9-aa9e-7351593e8429	yes	no	2	yes	yes	96	mc		female	na	No	post	no	post	999	45	Yes	40_49	yes	yes	999	no	close	yes	uuid:04c94a31-66ca-4fa9-aa9e-7351593e8429	pregnant					uuid:04c94a31-66ca-4fa9-aa9e-7351593e8429	na					uuid:04c94a31-66ca-4fa9-aa9e-7351593e8429	uk					uuid:04c94a31-66ca-4fa9-aa9e-7351593e8429	clean_water					uuid:04c94a31-66ca-4fa9-aa9e-7351593e8429
uuid:0569cf5f-77e0-4840-9e0f-27bccefd34f4	yes	no	3	yes	yes	877	Js	Hg	female	2	No	post	yes	post	3	37	Yes	30_39	yes	yes	999	yes	close	yes	uuid:0569cf5f-77e0-4840-9e0f-27bccefd34f4	pregnant					uuid:0569cf5f-77e0-4840-9e0f-27bccefd34f4	dk					uuid:0569cf5f-77e0-4840-9e0f-27bccefd34f4	help_me					uuid:0569cf5f-77e0-4840-9e0f-27bccefd34f4	unknown					uuid:0569cf5f-77e0-4840-9e0f-27bccefd34f4
uuid:05da2615-c15c-4e4e-ac4f-208e4fa5612e	yes	no	5	yes	yes	2690	Cj		male	na	Finish_primary	school	yes	school	2	18	Yes	18_29	yes	yes	999	no	not_too_far	yes	uuid:05da2615-c15c-4e4e-ac4f-208e4fa5612e	pregnant					uuid:05da2615-c15c-4e4e-ac4f-208e4fa5612e	na					uuid:05da2615-c15c-4e4e-ac4f-208e4fa5612e	help_me					uuid:05da2615-c15c-4e4e-ac4f-208e4fa5612e	clean_water					uuid:05da2615-c15c-4e4e-ac4f-208e4fa5612e
uuid:05fa5936-1bac-4e98-a86b-9aefe541708d	yes	no	1	yes	yes	282	Rm		male	na	University	school	yes	school	0	42	Yes	40_49	yes	yes	999	no	not_too_far	yes	uuid:05fa5936-1bac-4e98-a86b-9aefe541708d	dk					uuid:05fa5936-1bac-4e98-a86b-9aefe541708d	na					uuid:05fa5936-1bac-4e98-a86b-9aefe541708d	na_already_convinced					uuid:05fa5936-1bac-4e98-a86b-9aefe541708d	iftreat					uuid:05fa5936-1bac-4e98-a86b-9aefe541708d
uuid:06208653-d12a-462f-a171-25b73da20d04	yes	no	3	yes	yes	112	Jj	Ntyd	male	1	Primary	post	yes	post	3	62	Yes	60_69	yes	yes	999	no	not_too_far	yes	uuid:06208653-d12a-462f-a171-25b73da20d04	dk					uuid:06208653-d12a-462f-a171-25b73da20d04	na					uuid:06208653-d12a-462f-a171-25b73da20d04	help_me					uuid:06208653-d12a-462f-a171-25b73da20d04	other					uuid:06208653-d12a-462f-a171-25b73da20d04
uuid:0646728d-b605-428c-a047-9843cc3303c7	yes	no	4	yes	yes	270	Ja		female	na	Primary	post	yes	post	2	32	Yes	30_39	yes	yes	999	no	not_too_far	yes	uuid:0646728d-b605-428c-a047-9843cc3303c7	pregnant					uuid:0646728d-b605-428c-a047-9843cc3303c7	na					uuid:0646728d-b605-428c-a047-9843cc3303c7	side_effect					uuid:0646728d-b605-428c-a047-9843cc3303c7	clean_water					uuid:0646728d-b605-428c-a047-9843cc3303c7
uuid:066ea388-b482-47b2-b65e-0679b59b4cec	dk	dk	2	no	na	308	mr		female	na	No	na	dk	na	999	75	DK	70_79	yes	na	999	na	dk	no	uuid:066ea388-b482-47b2-b65e-0679b59b4cec	dk					uuid:066ea388-b482-47b2-b65e-0679b59b4cec	na					uuid:066ea388-b482-47b2-b65e-0679b59b4cec	uk					uuid:066ea388-b482-47b2-b65e-0679b59b4cec	unknown					uuid:066ea388-b482-47b2-b65e-0679b59b4cec
uuid:067ba1f3-3b7c-4bd6-98c0-160b4cafd193	yes	no	1	yes	yes	277	Nm		female	na	Primary	post	yes	post	3	25	Yes	18_29	yes	yes	999	no	close	yes	uuid:067ba1f3-3b7c-4bd6-98c0-160b4cafd193	pregnant					uuid:067ba1f3-3b7c-4bd6-98c0-160b4cafd193	na					uuid:067ba1f3-3b7c-4bd6-98c0-160b4cafd193	na_already_convinced					uuid:067ba1f3-3b7c-4bd6-98c0-160b4cafd193	clean_water					uuid:067ba1f3-3b7c-4bd6-98c0-160b4cafd193
uuid:0691c486-b690-4594-90e9-d525aea80204	no	no	2	dk	yes	319	dj		female	na	Primary	post	yes	post	2	56	Yes	50_59	yes	yes	999	yes	far	yes	uuid:0691c486-b690-4594-90e9-d525aea80204	pregnant					uuid:0691c486-b690-4594-90e9-d525aea80204	dk					uuid:0691c486-b690-4594-90e9-d525aea80204	uk					uuid:0691c486-b690-4594-90e9-d525aea80204	clean_water					uuid:0691c486-b690-4594-90e9-d525aea80204
uuid:069ebd1e-3c40-42a4-87b4-d05032c5c0a5	yes	no	2	yes	yes	2767	no		female	na	Primary	post	yes	post	2	45	Yes	40_49	yes	yes	999	yes	close	yes	uuid:069ebd1e-3c40-42a4-87b4-d05032c5c0a5	pregnant					uuid:069ebd1e-3c40-42a4-87b4-d05032c5c0a5	action					uuid:069ebd1e-3c40-42a4-87b4-d05032c5c0a5	uk					uuid:069ebd1e-3c40-42a4-87b4-d05032c5c0a5	unknown					uuid:069ebd1e-3c40-42a4-87b4-d05032c5c0a5
uuid:06c130bd-8df5-45e5-9554-c4afbce5d425	yes	no	4	yes	yes	2515	L e	Hfg	female	na	No	post	yes	post	2	27	Yes	18_29	yes	yes	999	no	close	yes	uuid:06c130bd-8df5-45e5-9554-c4afbce5d425	pregnant					uuid:06c130bd-8df5-45e5-9554-c4afbce5d425	na					uuid:06c130bd-8df5-45e5-9554-c4afbce5d425	na_already_convinced					uuid:06c130bd-8df5-45e5-9554-c4afbce5d425	iftreat					uuid:06c130bd-8df5-45e5-9554-c4afbce5d425
uuid:06d18865-24d4-4211-a580-d29320866ea1	dk	dk	4	no	na	210	J h	Yo pa renmen bwe konprime	female	na	Primary	na	yes	na	1	22	Yes	18_29	yes	na	999	na	dk	no	uuid:06d18865-24d4-4211-a580-d29320866ea1	pregnant					uuid:06d18865-24d4-4211-a580-d29320866ea1	na					uuid:06d18865-24d4-4211-a580-d29320866ea1	uk					uuid:06d18865-24d4-4211-a580-d29320866ea1	unknown					uuid:06d18865-24d4-4211-a580-d29320866ea1
uuid:07045e33-46a0-47bf-913a-a7f487da23e6	dk	yes	3	yes	yes	2793	Jw	Btf	male	1	Finish_primary	school	no	school	2	19	Yes	18_29	yes	yes	999	no	not_too_far	yes	uuid:07045e33-46a0-47bf-913a-a7f487da23e6	pregnant					uuid:07045e33-46a0-47bf-913a-a7f487da23e6	na					uuid:07045e33-46a0-47bf-913a-a7f487da23e6	help_me					uuid:07045e33-46a0-47bf-913a-a7f487da23e6	unknown					uuid:07045e33-46a0-47bf-913a-a7f487da23e6
uuid:07316d73-74b6-4c08-9e9b-4b129c13f224	yes	no	2	yes	yes	326	ec		male	na	Primary	post	yes	post	3	72	Yes	70_79	yes	yes	5	yes	not_too_far	yes	uuid:07316d73-74b6-4c08-9e9b-4b129c13f224	pregnant					uuid:07316d73-74b6-4c08-9e9b-4b129c13f224	dk					uuid:07316d73-74b6-4c08-9e9b-4b129c13f224	na_already_convinced					uuid:07316d73-74b6-4c08-9e9b-4b129c13f224	mosquito					uuid:07316d73-74b6-4c08-9e9b-4b129c13f224
uuid:0742df61-5123-4a78-93d0-235eb3158022	yes	no	1	yes	yes	2618	co		female	na	Primary	post	yes	post	1	29	Yes	18_29	yes	yes	5	yes	not_too_far	yes	uuid:0742df61-5123-4a78-93d0-235eb3158022	pregnant					uuid:0742df61-5123-4a78-93d0-235eb3158022	dk					uuid:0742df61-5123-4a78-93d0-235eb3158022	na_already_convinced					uuid:0742df61-5123-4a78-93d0-235eb3158022	clean_water					uuid:0742df61-5123-4a78-93d0-235eb3158022
uuid:07661350-09d5-4cbb-8486-139b1a5a790c	yes	no	2	yes	yes	100	cm		female	na	No	post	yes	post	2	28	Yes	18_29	yes	yes	999	yes	close	yes	uuid:07661350-09d5-4cbb-8486-139b1a5a790c	dk					uuid:07661350-09d5-4cbb-8486-139b1a5a790c	dk					uuid:07661350-09d5-4cbb-8486-139b1a5a790c	na_already_convinced					uuid:07661350-09d5-4cbb-8486-139b1a5a790c	unknown					uuid:07661350-09d5-4cbb-8486-139b1a5a790c
uuid:076bee5f-934a-4afd-8e94-2460893de932	yes	no	5	yes	yes	430	Vj		male	na	Finish_primary	post	yes	post	3	21	Yes	18_29	yes	yes	999	no	close	yes	uuid:076bee5f-934a-4afd-8e94-2460893de932	pregnant					uuid:076bee5f-934a-4afd-8e94-2460893de932	na					uuid:076bee5f-934a-4afd-8e94-2460893de932	na_already_convinced					uuid:076bee5f-934a-4afd-8e94-2460893de932	bednets					uuid:076bee5f-934a-4afd-8e94-2460893de932
uuid:0770a81f-1d5a-435f-bd23-06635526da6f	yes	yes	4	yes	yes	381	Tp	Ol	male	na	No	school	no	school	2	55	No	50_59	no	yes	2	no	not_too_far	yes	uuid:0770a81f-1d5a-435f-bd23-06635526da6f	pregnant					uuid:0770a81f-1d5a-435f-bd23-06635526da6f	na					uuid:0770a81f-1d5a-435f-bd23-06635526da6f	uk					uuid:0770a81f-1d5a-435f-bd23-06635526da6f	unknown					uuid:0770a81f-1d5a-435f-bd23-06635526da6f
uuid:077e6c8f-056e-44d6-871b-3428225c807a	yes	no	5	yes	yes	1065	Se		male	na	No	post	yes	post	3	30	Yes	30_39	no	yes	999	no	close	yes	uuid:077e6c8f-056e-44d6-871b-3428225c807a	dk					uuid:077e6c8f-056e-44d6-871b-3428225c807a	na					uuid:077e6c8f-056e-44d6-871b-3428225c807a	help_me					uuid:077e6c8f-056e-44d6-871b-3428225c807a	n/a					uuid:077e6c8f-056e-44d6-871b-3428225c807a
uuid:078cafc4-c3dd-4370-8e5e-9e817404e0d5	dk	dk	2	no	na	318	ll		female	na	Primary	na	no	na	999	29	Yes	18_29	yes	na	999	na	dk	no	uuid:078cafc4-c3dd-4370-8e5e-9e817404e0d5	pregnant					uuid:078cafc4-c3dd-4370-8e5e-9e817404e0d5	na					uuid:078cafc4-c3dd-4370-8e5e-9e817404e0d5	uk					uuid:078cafc4-c3dd-4370-8e5e-9e817404e0d5	bednets					uuid:078cafc4-c3dd-4370-8e5e-9e817404e0d5
uuid:07f9be45-93ed-4e9c-91f0-0d3b8eeb0f24	yes	yes	5	yes	yes	235	Mj	Ok	female	1	No	post	yes	post	3	40	Yes	40_49	yes	yes	999	no	close	yes	uuid:07f9be45-93ed-4e9c-91f0-0d3b8eeb0f24	pregnant					uuid:07f9be45-93ed-4e9c-91f0-0d3b8eeb0f24	na					uuid:07f9be45-93ed-4e9c-91f0-0d3b8eeb0f24	na_already_convinced					uuid:07f9be45-93ed-4e9c-91f0-0d3b8eeb0f24	clean_water					uuid:07f9be45-93ed-4e9c-91f0-0d3b8eeb0f24
uuid:08178ed5-e129-4151-ab8e-ef448373b381	dk	dk	4	yes	na	211	M p		female	na	No	na	no	na	999	50	Yes	50_59	yes	na	999	na	dk	no	uuid:08178ed5-e129-4151-ab8e-ef448373b381	pregnant					uuid:08178ed5-e129-4151-ab8e-ef448373b381	na					uuid:08178ed5-e129-4151-ab8e-ef448373b381	help_me					uuid:08178ed5-e129-4151-ab8e-ef448373b381	unknown					uuid:08178ed5-e129-4151-ab8e-ef448373b381
uuid:084fad4a-6459-4a1e-86cd-8888e9869c07	yes	dk	4	yes	dk	338	Sp	Ok	female	na	Primary	school	yes	school	2	21	Yes	18_29	yes	yes	5	no	not_too_far	yes	uuid:084fad4a-6459-4a1e-86cd-8888e9869c07	dk					uuid:084fad4a-6459-4a1e-86cd-8888e9869c07	na					uuid:084fad4a-6459-4a1e-86cd-8888e9869c07	help_me					uuid:084fad4a-6459-4a1e-86cd-8888e9869c07	clean_water					uuid:084fad4a-6459-4a1e-86cd-8888e9869c07
uuid:08736a97-b15e-4f0e-bfd0-a3e91f693652	dk	dk	3	yes	na	155	me	vhvd	female	dk	Primary	na	no	na	0	28	No	18_29	yes	na	999	na	dk	no	uuid:08736a97-b15e-4f0e-bfd0-a3e91f693652	pregnant					uuid:08736a97-b15e-4f0e-bfd0-a3e91f693652	na					uuid:08736a97-b15e-4f0e-bfd0-a3e91f693652	side_effect					uuid:08736a97-b15e-4f0e-bfd0-a3e91f693652	unknown					uuid:08736a97-b15e-4f0e-bfd0-a3e91f693652
uuid:08c0f9ec-fee5-428b-bd88-418fe77a5fe8	yes	no	3	yes	yes	132	Ci	Vh	female	1	No	post	yes	post	3	38	Yes	30_39	yes	yes	999	no	close	yes	uuid:08c0f9ec-fee5-428b-bd88-418fe77a5fe8	dk					uuid:08c0f9ec-fee5-428b-bd88-418fe77a5fe8	na					uuid:08c0f9ec-fee5-428b-bd88-418fe77a5fe8	help_me					uuid:08c0f9ec-fee5-428b-bd88-418fe77a5fe8	iftreat					uuid:08c0f9ec-fee5-428b-bd88-418fe77a5fe8
uuid:08f2f59d-060c-451c-8c21-7cc7dfc90c28	yes	no	4	yes	yes	178	M d		female	na	Finish_primary	post	yes	post	1	22	Yes	18_29	yes	yes	999	no	close	yes	uuid:08f2f59d-060c-451c-8c21-7cc7dfc90c28	pregnant					uuid:08f2f59d-060c-451c-8c21-7cc7dfc90c28	na					uuid:08f2f59d-060c-451c-8c21-7cc7dfc90c28	help_me					uuid:08f2f59d-060c-451c-8c21-7cc7dfc90c28	clean_water					uuid:08f2f59d-060c-451c-8c21-7cc7dfc90c28
uuid:08f5e9c7-b87d-49e8-bb74-b0712088d4a8	yes	no	4	yes	yes	154	J s		male	na	Finish_primary	post	yes	post	2	25	Yes	18_29	yes	yes	999	yes	not_too_far	yes	uuid:08f5e9c7-b87d-49e8-bb74-b0712088d4a8	pregnant					uuid:08f5e9c7-b87d-49e8-bb74-b0712088d4a8	action					uuid:08f5e9c7-b87d-49e8-bb74-b0712088d4a8	help_me					uuid:08f5e9c7-b87d-49e8-bb74-b0712088d4a8	clean_water					uuid:08f5e9c7-b87d-49e8-bb74-b0712088d4a8
uuid:096998ba-6639-44da-afeb-27fc7be70a72	yes	no	2	yes	yes	967	dn		female	na	Primary	post	yes	post	2	34	Yes	30_39	yes	yes	999	no	close	yes	uuid:096998ba-6639-44da-afeb-27fc7be70a72	pregnant					uuid:096998ba-6639-44da-afeb-27fc7be70a72	na					uuid:096998ba-6639-44da-afeb-27fc7be70a72	na_already_convinced					uuid:096998ba-6639-44da-afeb-27fc7be70a72	clean_water					uuid:096998ba-6639-44da-afeb-27fc7be70a72
uuid:097335cc-0c50-4ca3-b68d-6c092f4270ef	dk	dk	2	yes	na	915	gf		male	na	Primary	na	no	na	0	38	Yes	30_39	yes	na	999	na	dk	no	uuid:097335cc-0c50-4ca3-b68d-6c092f4270ef	pregnant					uuid:097335cc-0c50-4ca3-b68d-6c092f4270ef	na					uuid:097335cc-0c50-4ca3-b68d-6c092f4270ef	na_already_convinced					uuid:097335cc-0c50-4ca3-b68d-6c092f4270ef	unknown					uuid:097335cc-0c50-4ca3-b68d-6c092f4270ef
uuid:0977ac89-fa42-4d08-927c-4132293ef97e	na_not_aware_of_post	dk	5	yes	na	425	Kp		female	na	No	na	no	na	0	20	No	18_29	no	na	999	na	na_not_aware_post	no	uuid:0977ac89-fa42-4d08-927c-4132293ef97e	dk					uuid:0977ac89-fa42-4d08-927c-4132293ef97e	na					uuid:0977ac89-fa42-4d08-927c-4132293ef97e	uk					uuid:0977ac89-fa42-4d08-927c-4132293ef97e	n/a					uuid:0977ac89-fa42-4d08-927c-4132293ef97e
uuid:0a15d13c-01f5-4329-a7f0-c3c8a258d5b3	yes	no	5	yes	yes	228	Lc		female	1	Some_secondary	post	yes	post	3	30	Yes	30_39	yes	yes	999	yes	close	yes	uuid:0a15d13c-01f5-4329-a7f0-c3c8a258d5b3	pregnant					uuid:0a15d13c-01f5-4329-a7f0-c3c8a258d5b3	dk					uuid:0a15d13c-01f5-4329-a7f0-c3c8a258d5b3	na_already_convinced					uuid:0a15d13c-01f5-4329-a7f0-c3c8a258d5b3	iftreat					uuid:0a15d13c-01f5-4329-a7f0-c3c8a258d5b3
uuid:0a1d2f9a-549e-47f3-b300-2ae8d78edee3	yes	no	5	yes	yes	309	Me		female	na	No	post	yes	post	3	999	Yes	60_69	no	yes	999	no	close	yes	uuid:0a1d2f9a-549e-47f3-b300-2ae8d78edee3	dk					uuid:0a1d2f9a-549e-47f3-b300-2ae8d78edee3	na					uuid:0a1d2f9a-549e-47f3-b300-2ae8d78edee3	side_effect					uuid:0a1d2f9a-549e-47f3-b300-2ae8d78edee3	n/a					uuid:0a1d2f9a-549e-47f3-b300-2ae8d78edee3
uuid:0a210c44-1ed3-48e8-9c9e-06adec42a752	yes	no	5	yes	yes	2684	Vl		male	na	No	post	yes	post	2	63	Yes	60_69	yes	yes	999	no	not_too_far	yes	uuid:0a210c44-1ed3-48e8-9c9e-06adec42a752	pregnant					uuid:0a210c44-1ed3-48e8-9c9e-06adec42a752	na					uuid:0a210c44-1ed3-48e8-9c9e-06adec42a752	uk					uuid:0a210c44-1ed3-48e8-9c9e-06adec42a752	mosquito					uuid:0a210c44-1ed3-48e8-9c9e-06adec42a752
uuid:0a361356-d7a0-4073-a165-68124cf7f154	yes	no	4	yes	yes	2502	T.p	Ggr	female	na	No	post	yes	post	3	56	Yes	50_59	yes	yes	999	no	not_too_far	yes	uuid:0a361356-d7a0-4073-a165-68124cf7f154	pregnant					uuid:0a361356-d7a0-4073-a165-68124cf7f154	na					uuid:0a361356-d7a0-4073-a165-68124cf7f154	na_already_convinced					uuid:0a361356-d7a0-4073-a165-68124cf7f154	unknown					uuid:0a361356-d7a0-4073-a165-68124cf7f154
uuid:0a5cadd9-625c-4144-a05d-ea73849e1f54	yes	no	5	yes	yes	414	Mi		female	na	No	post	yes	post	2	65	Yes	60_69	no	yes	999	no	far	yes	uuid:0a5cadd9-625c-4144-a05d-ea73849e1f54	dk					uuid:0a5cadd9-625c-4144-a05d-ea73849e1f54	na					uuid:0a5cadd9-625c-4144-a05d-ea73849e1f54	side_effect					uuid:0a5cadd9-625c-4144-a05d-ea73849e1f54	n/a					uuid:0a5cadd9-625c-4144-a05d-ea73849e1f54
uuid:0a5ecd1d-9870-47ef-895a-56f1e8027fad	yes	no	3	yes	yes	152	gv	bfif	female	1	Finish_primary	post	no	post	2	32	Yes	30_39	yes	yes	999	no	not_too_far	yes	uuid:0a5ecd1d-9870-47ef-895a-56f1e8027fad	dk					uuid:0a5ecd1d-9870-47ef-895a-56f1e8027fad	na					uuid:0a5ecd1d-9870-47ef-895a-56f1e8027fad	help_family					uuid:0a5ecd1d-9870-47ef-895a-56f1e8027fad	unknown					uuid:0a5ecd1d-9870-47ef-895a-56f1e8027fad
uuid:0aa255a3-4d44-4cd5-a4e7-fb15c43a8cbb	dk	dk	4	dk	na	331	E g	Li ap bay ti moun tete	female	na	Finish_primary	na	no	na	999	26	Yes	18_29	yes	na	999	na	dk	no	uuid:0aa255a3-4d44-4cd5-a4e7-fb15c43a8cbb	pregnant					uuid:0aa255a3-4d44-4cd5-a4e7-fb15c43a8cbb	na					uuid:0aa255a3-4d44-4cd5-a4e7-fb15c43a8cbb	help_me					uuid:0aa255a3-4d44-4cd5-a4e7-fb15c43a8cbb	unknown					uuid:0aa255a3-4d44-4cd5-a4e7-fb15c43a8cbb
uuid:0aeafc54-b26b-45cc-ac3a-b7ba4dfd7d94	yes	no	2	yes	yes	898	cf		female	na	No	post	yes	post	3	33	Yes	30_39	yes	yes	999	no	close	yes	uuid:0aeafc54-b26b-45cc-ac3a-b7ba4dfd7d94	pregnant					uuid:0aeafc54-b26b-45cc-ac3a-b7ba4dfd7d94	na					uuid:0aeafc54-b26b-45cc-ac3a-b7ba4dfd7d94	uk					uuid:0aeafc54-b26b-45cc-ac3a-b7ba4dfd7d94	unknown					uuid:0aeafc54-b26b-45cc-ac3a-b7ba4dfd7d94
uuid:0b18ccfc-92cb-4f0f-83c2-c9be2067ea3d	yes	no	4	yes	yes	386	F.j	Yfr	female	na	Primary	post	yes	post	1	33	Yes	30_39	yes	yes	999	yes	close	yes	uuid:0b18ccfc-92cb-4f0f-83c2-c9be2067ea3d	dk					uuid:0b18ccfc-92cb-4f0f-83c2-c9be2067ea3d	dk					uuid:0b18ccfc-92cb-4f0f-83c2-c9be2067ea3d	other					uuid:0b18ccfc-92cb-4f0f-83c2-c9be2067ea3d	unknown					uuid:0b18ccfc-92cb-4f0f-83c2-c9be2067ea3d
uuid:0b3fe840-3395-4b7a-8d9e-482c86e57a21	yes	no	1	yes	yes	2667	epl		female	na	Some_secondary	post	yes	post	1	37	Yes	30_39	yes	yes	999	no	not_too_far	yes	uuid:0b3fe840-3395-4b7a-8d9e-482c86e57a21	pregnant					uuid:0b3fe840-3395-4b7a-8d9e-482c86e57a21	na					uuid:0b3fe840-3395-4b7a-8d9e-482c86e57a21	na_already_convinced					uuid:0b3fe840-3395-4b7a-8d9e-482c86e57a21	iftreat					uuid:0b3fe840-3395-4b7a-8d9e-482c86e57a21
uuid:0b521d4d-827f-4b66-b05f-e9244bbcf99e	yes	no	3	yes	yes	124	Rd	Jtf	female	1	No	post	yes	post	3	45	No	40_49	no	yes	999	yes	close	yes	uuid:0b521d4d-827f-4b66-b05f-e9244bbcf99e	dk					uuid:0b521d4d-827f-4b66-b05f-e9244bbcf99e	dk					uuid:0b521d4d-827f-4b66-b05f-e9244bbcf99e	side_effect					uuid:0b521d4d-827f-4b66-b05f-e9244bbcf99e	n/a					uuid:0b521d4d-827f-4b66-b05f-e9244bbcf99e
uuid:0b586810-380d-467c-81db-fbdd0f38b4b2	yes	no	5	yes	yes	2697	Jl		female	na	Primary	post	yes	post	3	42	Yes	40_49	yes	yes	999	no	close	yes	uuid:0b586810-380d-467c-81db-fbdd0f38b4b2	pregnant					uuid:0b586810-380d-467c-81db-fbdd0f38b4b2	na					uuid:0b586810-380d-467c-81db-fbdd0f38b4b2	help_family					uuid:0b586810-380d-467c-81db-fbdd0f38b4b2	clean_water					uuid:0b586810-380d-467c-81db-fbdd0f38b4b2
uuid:0b62f797-15fa-4368-bfc8-b863929c23f0	yes	no	2	yes	yes	92	ms		female	na	Primary	post	yes	post	1	45	Yes	40_49	yes	yes	999	yes	close	yes	uuid:0b62f797-15fa-4368-bfc8-b863929c23f0	pregnant					uuid:0b62f797-15fa-4368-bfc8-b863929c23f0	worm					uuid:0b62f797-15fa-4368-bfc8-b863929c23f0	uk					uuid:0b62f797-15fa-4368-bfc8-b863929c23f0	clean_water					uuid:0b62f797-15fa-4368-bfc8-b863929c23f0
uuid:0b7da130-14dd-4474-aeb5-7ed3d4908dde	dk	dk	5	yes	na	230	Aa		male	dk	No	na	no	na	0	49	Yes	40_49	yes	na	999	na	dk	no	uuid:0b7da130-14dd-4474-aeb5-7ed3d4908dde	dk					uuid:0b7da130-14dd-4474-aeb5-7ed3d4908dde	na					uuid:0b7da130-14dd-4474-aeb5-7ed3d4908dde	help_me					uuid:0b7da130-14dd-4474-aeb5-7ed3d4908dde	n/a					uuid:0b7da130-14dd-4474-aeb5-7ed3d4908dde
uuid:0b7f350e-a004-443d-9286-3e11ec396f13	na_not_aware_of_post	dk	5	yes	na	417	Dm		female	na	Some_secondary	na	no	na	0	24	Yes	18_29	yes	na	999	na	na_not_aware_post	no	uuid:0b7f350e-a004-443d-9286-3e11ec396f13	pregnant					uuid:0b7f350e-a004-443d-9286-3e11ec396f13	na					uuid:0b7f350e-a004-443d-9286-3e11ec396f13	help_me					uuid:0b7f350e-a004-443d-9286-3e11ec396f13	bednets					uuid:0b7f350e-a004-443d-9286-3e11ec396f13
uuid:0b83a0fb-a833-4481-bbe2-7a5ceb81ccbf	yes	no	2	yes	yes	451	bc		female	na	Some_secondary	post	yes	post	4	30	Yes	30_39	yes	yes	999	no	close	yes	uuid:0b83a0fb-a833-4481-bbe2-7a5ceb81ccbf	pregnant					uuid:0b83a0fb-a833-4481-bbe2-7a5ceb81ccbf	na					uuid:0b83a0fb-a833-4481-bbe2-7a5ceb81ccbf	na_already_convinced					uuid:0b83a0fb-a833-4481-bbe2-7a5ceb81ccbf	bednets					uuid:0b83a0fb-a833-4481-bbe2-7a5ceb81ccbf
uuid:0bc2c3ec-8f5c-474b-ac46-c827e2103794	na_not_aware_of_post	dk	4	yes	na	671	M.p	Jyr	female	na	Some_secondary	na	yes	na	1	36	Yes	30_39	yes	no	999	yes	na_not_aware_post	no	uuid:0bc2c3ec-8f5c-474b-ac46-c827e2103794	pregnant					uuid:0bc2c3ec-8f5c-474b-ac46-c827e2103794	action					uuid:0bc2c3ec-8f5c-474b-ac46-c827e2103794	other					uuid:0bc2c3ec-8f5c-474b-ac46-c827e2103794	clean_water					uuid:0bc2c3ec-8f5c-474b-ac46-c827e2103794
uuid:0c00ba6c-047e-4f7d-9b2d-a9aebfebfcce	yes	no	1	yes	yes	43	Cc		female	na	No	post	yes	post	999	70	Yes	70_79	yes	yes	999	yes	not_too_far	yes	uuid:0c00ba6c-047e-4f7d-9b2d-a9aebfebfcce	dk					uuid:0c00ba6c-047e-4f7d-9b2d-a9aebfebfcce	action					uuid:0c00ba6c-047e-4f7d-9b2d-a9aebfebfcce	na_already_convinced					uuid:0c00ba6c-047e-4f7d-9b2d-a9aebfebfcce	iftreat					uuid:0c00ba6c-047e-4f7d-9b2d-a9aebfebfcce
uuid:0c37bb38-b7a8-4fc6-8d18-b015de917e25	na_not_aware_of_post	dk	5	yes	na	1035	Ej		female	na	Primary	na	yes	na	1	23	Yes	18_29	no	no	999	na	na_not_aware_post	yes	uuid:0c37bb38-b7a8-4fc6-8d18-b015de917e25	dk					uuid:0c37bb38-b7a8-4fc6-8d18-b015de917e25	na					uuid:0c37bb38-b7a8-4fc6-8d18-b015de917e25	help_me					uuid:0c37bb38-b7a8-4fc6-8d18-b015de917e25	n/a					uuid:0c37bb38-b7a8-4fc6-8d18-b015de917e25
uuid:0c50f399-5b0f-44e2-91ae-a2753983f49d	yes	no	1	yes	yes	2646	Wt		female	na	Some_secondary	home	yes	post	1	37	Yes	30_39	yes	yes	999	yes	close	yes	uuid:0c50f399-5b0f-44e2-91ae-a2753983f49d	pregnant					uuid:0c50f399-5b0f-44e2-91ae-a2753983f49d	dk					uuid:0c50f399-5b0f-44e2-91ae-a2753983f49d	na_already_convinced					uuid:0c50f399-5b0f-44e2-91ae-a2753983f49d	bednets					uuid:0c50f399-5b0f-44e2-91ae-a2753983f49d
uuid:0cbd25e5-9179-4b59-a52f-7046eec65e7c	yes	yes	4	yes	no	350	Th	Ok	male	na	Primary	post	yes	post	3	29	Yes	18_29	yes	yes	5	no	not_too_far	yes	uuid:0cbd25e5-9179-4b59-a52f-7046eec65e7c	pregnant					uuid:0cbd25e5-9179-4b59-a52f-7046eec65e7c	na					uuid:0cbd25e5-9179-4b59-a52f-7046eec65e7c	help_me					uuid:0cbd25e5-9179-4b59-a52f-7046eec65e7c	clean_water					uuid:0cbd25e5-9179-4b59-a52f-7046eec65e7c
uuid:0cdb617b-3a2f-4bcd-bfb6-eaff15360d26	yes	no	3	yes	yes	732	Gn	Frb	female	1	No	home	yes	post	3	43	Yes	40_49	yes	yes	999	no	close	yes	uuid:0cdb617b-3a2f-4bcd-bfb6-eaff15360d26	pregnant					uuid:0cdb617b-3a2f-4bcd-bfb6-eaff15360d26	na					uuid:0cdb617b-3a2f-4bcd-bfb6-eaff15360d26	help_me					uuid:0cdb617b-3a2f-4bcd-bfb6-eaff15360d26	unknown					uuid:0cdb617b-3a2f-4bcd-bfb6-eaff15360d26
uuid:0da22f17-3e2e-4e0d-a6ed-e2469735cdad	yes	no	5	yes	yes	175	gm		female	na	No	post	yes	post	3	70	Yes	70_79	yes	yes	999	no	close	yes	uuid:0da22f17-3e2e-4e0d-a6ed-e2469735cdad	pregnant					uuid:0da22f17-3e2e-4e0d-a6ed-e2469735cdad	na					uuid:0da22f17-3e2e-4e0d-a6ed-e2469735cdad	side_effect					uuid:0da22f17-3e2e-4e0d-a6ed-e2469735cdad	clean_water					uuid:0da22f17-3e2e-4e0d-a6ed-e2469735cdad
uuid:0da39515-996e-44dd-a25f-a2942a563155	no	no	1	yes	na	2	Di		female	na	No	na	yes	na	1	24	Yes	18_29	yes	na	999	no	not_too_far	no	uuid:0da39515-996e-44dd-a25f-a2942a563155	pregnant					uuid:0da39515-996e-44dd-a25f-a2942a563155	na					uuid:0da39515-996e-44dd-a25f-a2942a563155	na_already_convinced					uuid:0da39515-996e-44dd-a25f-a2942a563155	iftreat					uuid:0da39515-996e-44dd-a25f-a2942a563155
uuid:0db0aa66-3b1f-437d-ade0-b19bea3f6021	yes	no	3	yes	yes	137	Cj	Grhg	male	1	Primary	post	yes	post	3	45	Yes	40_49	yes	yes	999	no	close	yes	uuid:0db0aa66-3b1f-437d-ade0-b19bea3f6021	dk					uuid:0db0aa66-3b1f-437d-ade0-b19bea3f6021	na					uuid:0db0aa66-3b1f-437d-ade0-b19bea3f6021	help_me					uuid:0db0aa66-3b1f-437d-ade0-b19bea3f6021	iftreat					uuid:0db0aa66-3b1f-437d-ade0-b19bea3f6021
uuid:0db7c007-6bfc-4093-84f9-eb4a2d01ea60	yes	no	1	yes	yes	598	mit		female	na	No	post	yes	post	2	54	Yes	50_59	yes	yes	999	no	not_too_far	yes	uuid:0db7c007-6bfc-4093-84f9-eb4a2d01ea60	dk					uuid:0db7c007-6bfc-4093-84f9-eb4a2d01ea60	na					uuid:0db7c007-6bfc-4093-84f9-eb4a2d01ea60	na_already_convinced					uuid:0db7c007-6bfc-4093-84f9-eb4a2d01ea60	iftreat					uuid:0db7c007-6bfc-4093-84f9-eb4a2d01ea60
uuid:0db9e307-73ee-42b6-89d8-8b1e8efb1374	yes	no	1	yes	yes	39	Ym		female	na	Some_secondary	post	yes	post	1	19	Yes	18_29	yes	yes	999	yes	not_too_far	yes	uuid:0db9e307-73ee-42b6-89d8-8b1e8efb1374	pregnant					uuid:0db9e307-73ee-42b6-89d8-8b1e8efb1374	dk					uuid:0db9e307-73ee-42b6-89d8-8b1e8efb1374	na_already_convinced					uuid:0db9e307-73ee-42b6-89d8-8b1e8efb1374	iftreat					uuid:0db9e307-73ee-42b6-89d8-8b1e8efb1374
uuid:0ddae9cc-bba2-42c9-b68c-af1aa5f28e80	other	no	4	yes	na	345	A.m	Ok	female	na	No	home	yes	home	3	73	No	70_79	no	yes	999	no	other	yes	uuid:0ddae9cc-bba2-42c9-b68c-af1aa5f28e80	dk					uuid:0ddae9cc-bba2-42c9-b68c-af1aa5f28e80	na					uuid:0ddae9cc-bba2-42c9-b68c-af1aa5f28e80	other					uuid:0ddae9cc-bba2-42c9-b68c-af1aa5f28e80	unknown					uuid:0ddae9cc-bba2-42c9-b68c-af1aa5f28e80
uuid:0de0c1ee-bbfd-4b0b-bcfa-40f503f85ade	dk	dk	2	yes	na	55	jd		female	na	No	na	dk	na	999	999	Yes	70_79	yes	na	999	na	dk	no	uuid:0de0c1ee-bbfd-4b0b-bcfa-40f503f85ade	dk					uuid:0de0c1ee-bbfd-4b0b-bcfa-40f503f85ade	na					uuid:0de0c1ee-bbfd-4b0b-bcfa-40f503f85ade	uk					uuid:0de0c1ee-bbfd-4b0b-bcfa-40f503f85ade	unknown					uuid:0de0c1ee-bbfd-4b0b-bcfa-40f503f85ade
uuid:0e0459ef-634f-4401-92b3-5de180360754	yes	no	2	yes	yes	73	aa		female	na	No	post	yes	post	3	37	Yes	30_39	yes	yes	999	yes	close	yes	uuid:0e0459ef-634f-4401-92b3-5de180360754	dk					uuid:0e0459ef-634f-4401-92b3-5de180360754	action					uuid:0e0459ef-634f-4401-92b3-5de180360754	uk					uuid:0e0459ef-634f-4401-92b3-5de180360754	unknown					uuid:0e0459ef-634f-4401-92b3-5de180360754
uuid:0e3e99d8-065a-47d0-97d9-0d2bc4007d78	other	dk	4	yes	dk	352	Do	Alaitement	female	na	Primary	post	no	post	2	18	Yes	18_29	yes	no	999	na	not_too_far	yes	uuid:0e3e99d8-065a-47d0-97d9-0d2bc4007d78	pregnant					uuid:0e3e99d8-065a-47d0-97d9-0d2bc4007d78	na					uuid:0e3e99d8-065a-47d0-97d9-0d2bc4007d78	help_me					uuid:0e3e99d8-065a-47d0-97d9-0d2bc4007d78	iftreat					uuid:0e3e99d8-065a-47d0-97d9-0d2bc4007d78
uuid:0e4fc573-3999-473b-bc32-21405dd20fc6	yes	no	5	yes	yes	260	Mb		female	na	Primary	home	yes	home	2	65	Yes	60_69	yes	yes	999	no	close	yes	uuid:0e4fc573-3999-473b-bc32-21405dd20fc6	pregnant					uuid:0e4fc573-3999-473b-bc32-21405dd20fc6	na					uuid:0e4fc573-3999-473b-bc32-21405dd20fc6	help_me					uuid:0e4fc573-3999-473b-bc32-21405dd20fc6	bednets					uuid:0e4fc573-3999-473b-bc32-21405dd20fc6
uuid:0e6c0319-af99-4531-b209-9ce591457f2d	yes	no	1	yes	yes	2628	em	mnt presente	female	na	No	post	yes	post	2	36	Yes	30_39	yes	yes	999	no	close	yes	uuid:0e6c0319-af99-4531-b209-9ce591457f2d	dk					uuid:0e6c0319-af99-4531-b209-9ce591457f2d	na					uuid:0e6c0319-af99-4531-b209-9ce591457f2d	na_already_convinced					uuid:0e6c0319-af99-4531-b209-9ce591457f2d	unknown					uuid:0e6c0319-af99-4531-b209-9ce591457f2d
uuid:0e7446ca-bd13-4637-966b-6be46c0345bf	yes	no	1	yes	yes	274	Jjw		male	na	Some_secondary	post	yes	post	1	50	Yes	50_59	yes	yes	999	no	close	yes	uuid:0e7446ca-bd13-4637-966b-6be46c0345bf	pregnant					uuid:0e7446ca-bd13-4637-966b-6be46c0345bf	na					uuid:0e7446ca-bd13-4637-966b-6be46c0345bf	na_already_convinced					uuid:0e7446ca-bd13-4637-966b-6be46c0345bf	clean_water					uuid:0e7446ca-bd13-4637-966b-6be46c0345bf
uuid:0ea336ce-498b-4e79-a485-2b372a0500ce	yes	no	1	yes	yes	273	Dj		male	na	No	post	yes	post	1	79	No	70_79	yes	yes	999	no	close	yes	uuid:0ea336ce-498b-4e79-a485-2b372a0500ce	dk					uuid:0ea336ce-498b-4e79-a485-2b372a0500ce	na					uuid:0ea336ce-498b-4e79-a485-2b372a0500ce	na_already_convinced					uuid:0ea336ce-498b-4e79-a485-2b372a0500ce	iftreat					uuid:0ea336ce-498b-4e79-a485-2b372a0500ce
uuid:0ee647be-6213-4767-a72e-6c3850420c4b	na_not_aware_of_post	dk	5	dk	na	234	Me		female	na	Primary	na	no	na	0	82	No	80_89	no	na	999	na	na_not_aware_post	no	uuid:0ee647be-6213-4767-a72e-6c3850420c4b	dk					uuid:0ee647be-6213-4767-a72e-6c3850420c4b	na					uuid:0ee647be-6213-4767-a72e-6c3850420c4b	uk					uuid:0ee647be-6213-4767-a72e-6c3850420c4b	n/a					uuid:0ee647be-6213-4767-a72e-6c3850420c4b
uuid:0f229fd0-2ca9-4577-87d2-733678f60e2b	dk	dk	4	yes	dk	362	Mp	Ok	female	na	No	home	yes	home	999	83	Yes	80_89	yes	yes	999	no	not_too_far	no	uuid:0f229fd0-2ca9-4577-87d2-733678f60e2b	dk					uuid:0f229fd0-2ca9-4577-87d2-733678f60e2b	na					uuid:0f229fd0-2ca9-4577-87d2-733678f60e2b	help_family					uuid:0f229fd0-2ca9-4577-87d2-733678f60e2b	clean_water					uuid:0f229fd0-2ca9-4577-87d2-733678f60e2b
uuid:0f3c6792-05ed-4154-91bd-4fc4a833d333	yes	no	1	yes	yes	264	Ys		female	na	No	post	yes	post	2	999	Yes	50_59	yes	yes	999	no	close	yes	uuid:0f3c6792-05ed-4154-91bd-4fc4a833d333	other					uuid:0f3c6792-05ed-4154-91bd-4fc4a833d333	na					uuid:0f3c6792-05ed-4154-91bd-4fc4a833d333	na_already_convinced					uuid:0f3c6792-05ed-4154-91bd-4fc4a833d333	iftreat					uuid:0f3c6792-05ed-4154-91bd-4fc4a833d333
uuid:0fa20124-3cfc-409b-be9c-ef04f31f4dea	yes	no	1	yes	yes	757	Kj		female	na	No	post	yes	post	3	70	Yes	70_79	yes	yes	999	no	close	yes	uuid:0fa20124-3cfc-409b-be9c-ef04f31f4dea	dk					uuid:0fa20124-3cfc-409b-be9c-ef04f31f4dea	na					uuid:0fa20124-3cfc-409b-be9c-ef04f31f4dea	na_already_convinced					uuid:0fa20124-3cfc-409b-be9c-ef04f31f4dea	clean_water					uuid:0fa20124-3cfc-409b-be9c-ef04f31f4dea
uuid:0fa25507-c902-42d8-b56a-523e6d079581	yes	no	2	yes	yes	317	dd		female	na	Primary	post	yes	post	2	38	Yes	30_39	yes	yes	999	yes	far	yes	uuid:0fa25507-c902-42d8-b56a-523e6d079581	pregnant					uuid:0fa25507-c902-42d8-b56a-523e6d079581	na					uuid:0fa25507-c902-42d8-b56a-523e6d079581	uk					uuid:0fa25507-c902-42d8-b56a-523e6d079581	mosquito					uuid:0fa25507-c902-42d8-b56a-523e6d079581
uuid:0fed510e-c0fa-4e6e-b65a-2dfa42803837	yes	no	5	yes	yes	216	Bj		female	na	Some_secondary	post	yes	post	2	27	Yes	18_29	yes	yes	999	no	close	yes	uuid:0fed510e-c0fa-4e6e-b65a-2dfa42803837	pregnant					uuid:0fed510e-c0fa-4e6e-b65a-2dfa42803837	na					uuid:0fed510e-c0fa-4e6e-b65a-2dfa42803837	help_me					uuid:0fed510e-c0fa-4e6e-b65a-2dfa42803837	iftreat					uuid:0fed510e-c0fa-4e6e-b65a-2dfa42803837
uuid:104485ac-ba47-4a17-b47a-de7f3e60fed0	yes	yes	4	yes	yes	2571	Cd	Ty	female	na	Primary	post	yes	post	2	37	Yes	30_39	yes	yes	999	yes	close	yes	uuid:104485ac-ba47-4a17-b47a-de7f3e60fed0	pregnant					uuid:104485ac-ba47-4a17-b47a-de7f3e60fed0	action					uuid:104485ac-ba47-4a17-b47a-de7f3e60fed0	help_me					uuid:104485ac-ba47-4a17-b47a-de7f3e60fed0	clean_water					uuid:104485ac-ba47-4a17-b47a-de7f3e60fed0
uuid:10765ad9-eca0-4cae-86dc-bd4af6ef5c49	yes	no	3	yes	yes	159	cj	gfjf	female	1	Some_secondary	home	no	post	2	25	Yes	18_29	yes	yes	999	no	not_too_far	yes	uuid:10765ad9-eca0-4cae-86dc-bd4af6ef5c49	pregnant					uuid:10765ad9-eca0-4cae-86dc-bd4af6ef5c49	na					uuid:10765ad9-eca0-4cae-86dc-bd4af6ef5c49	help_me					uuid:10765ad9-eca0-4cae-86dc-bd4af6ef5c49	iftreat					uuid:10765ad9-eca0-4cae-86dc-bd4af6ef5c49
uuid:10bed5ac-d44e-4a9b-a489-3d96689e5e3d	yes	no	5	yes	yes	1048	Ff		female	na	Finish_primary	home	yes	post	1	27	Yes	18_29	yes	yes	999	no	close	yes	uuid:10bed5ac-d44e-4a9b-a489-3d96689e5e3d	pregnant					uuid:10bed5ac-d44e-4a9b-a489-3d96689e5e3d	na					uuid:10bed5ac-d44e-4a9b-a489-3d96689e5e3d	na_already_convinced					uuid:10bed5ac-d44e-4a9b-a489-3d96689e5e3d	bednets					uuid:10bed5ac-d44e-4a9b-a489-3d96689e5e3d
uuid:10c4aaa1-8a73-48f2-8046-968b5f287f42	yes	no	3	yes	yes	130	Ad	Xf	male	1	Primary	post	yes	post	3	53	Yes	50_59	yes	yes	999	no	not_too_far	yes	uuid:10c4aaa1-8a73-48f2-8046-968b5f287f42	dk					uuid:10c4aaa1-8a73-48f2-8046-968b5f287f42	na					uuid:10c4aaa1-8a73-48f2-8046-968b5f287f42	side_effect					uuid:10c4aaa1-8a73-48f2-8046-968b5f287f42	unknown					uuid:10c4aaa1-8a73-48f2-8046-968b5f287f42
uuid:10cd93cf-638c-40b3-8e4f-8257fc46e5e6	yes	no	2	yes	yes	2758	tw		female	na	Some_secondary	post	yes	post	3	27	Yes	18_29	yes	yes	999	no	close	yes	uuid:10cd93cf-638c-40b3-8e4f-8257fc46e5e6	pregnant					uuid:10cd93cf-638c-40b3-8e4f-8257fc46e5e6	na					uuid:10cd93cf-638c-40b3-8e4f-8257fc46e5e6	uk					uuid:10cd93cf-638c-40b3-8e4f-8257fc46e5e6	clean_water					uuid:10cd93cf-638c-40b3-8e4f-8257fc46e5e6
uuid:1106fae9-c80f-4e7f-9108-6dd31fc6e2f2	yes	no	5	yes	yes	287	Mp		female	na	No	post	yes	post	3	84	Yes	80_89	no	yes	999	no	close	yes	uuid:1106fae9-c80f-4e7f-9108-6dd31fc6e2f2	dk					uuid:1106fae9-c80f-4e7f-9108-6dd31fc6e2f2	na					uuid:1106fae9-c80f-4e7f-9108-6dd31fc6e2f2	side_effect					uuid:1106fae9-c80f-4e7f-9108-6dd31fc6e2f2	n/a					uuid:1106fae9-c80f-4e7f-9108-6dd31fc6e2f2
uuid:110ab0d7-52fa-4aab-9cec-d271f964b104	dk	no	5	yes	no	319	ei		male	na	Primary	post	yes	post	3	30	Yes	30_39	yes	yes	999	no	close	yes	uuid:110ab0d7-52fa-4aab-9cec-d271f964b104	pregnant					uuid:110ab0d7-52fa-4aab-9cec-d271f964b104	na					uuid:110ab0d7-52fa-4aab-9cec-d271f964b104	na_already_convinced					uuid:110ab0d7-52fa-4aab-9cec-d271f964b104	unknown					uuid:110ab0d7-52fa-4aab-9cec-d271f964b104
uuid:1118e5f9-cbf2-4d7b-9f98-fe94b201cfa5	yes	yes	2	yes	yes	455	ja		male	2	Primary	post	yes	post	3	27	Yes	18_29	yes	yes	999	no	close	yes	uuid:1118e5f9-cbf2-4d7b-9f98-fe94b201cfa5	pregnant					uuid:1118e5f9-cbf2-4d7b-9f98-fe94b201cfa5	na					uuid:1118e5f9-cbf2-4d7b-9f98-fe94b201cfa5	na_already_convinced					uuid:1118e5f9-cbf2-4d7b-9f98-fe94b201cfa5	unknown					uuid:1118e5f9-cbf2-4d7b-9f98-fe94b201cfa5
uuid:112b5084-2ba8-49a1-a0dd-051f54038046	dk	dk	2	yes	yes	960	fs		female	na	Primary	home	yes	post	1	40	Yes	40_49	yes	yes	999	yes	dk	yes	uuid:112b5084-2ba8-49a1-a0dd-051f54038046	pregnant					uuid:112b5084-2ba8-49a1-a0dd-051f54038046	worm					uuid:112b5084-2ba8-49a1-a0dd-051f54038046	na_already_convinced					uuid:112b5084-2ba8-49a1-a0dd-051f54038046	unknown					uuid:112b5084-2ba8-49a1-a0dd-051f54038046
uuid:117b3167-485c-4e34-b1d8-7a927e0686b9	yes	no	5	yes	yes	164	mp	lot moun nan pa la	female	na	Primary	post	yes	post	2	31	Yes	30_39	yes	yes	999	yes	not_too_far	yes	uuid:117b3167-485c-4e34-b1d8-7a927e0686b9	pregnant					uuid:117b3167-485c-4e34-b1d8-7a927e0686b9	dk					uuid:117b3167-485c-4e34-b1d8-7a927e0686b9	uk					uuid:117b3167-485c-4e34-b1d8-7a927e0686b9	unknown					uuid:117b3167-485c-4e34-b1d8-7a927e0686b9
uuid:11c34d4d-6505-400a-ad7b-2eaaa119a075	yes	no	5	yes	yes	282	Op		female	na	No	post	yes	post	3	79	Yes	70_79	no	yes	999	no	close	yes	uuid:11c34d4d-6505-400a-ad7b-2eaaa119a075	dk					uuid:11c34d4d-6505-400a-ad7b-2eaaa119a075	na					uuid:11c34d4d-6505-400a-ad7b-2eaaa119a075	help_me					uuid:11c34d4d-6505-400a-ad7b-2eaaa119a075	n/a					uuid:11c34d4d-6505-400a-ad7b-2eaaa119a075
uuid:12094b4d-e479-4077-900d-d5f5bdbbdca2	yes	no	2	yes	yes	2841	wt		female	na	Some_secondary	post	yes	post	1	30	Yes	30_39	yes	yes	999	no	close	yes	uuid:12094b4d-e479-4077-900d-d5f5bdbbdca2	pregnant					uuid:12094b4d-e479-4077-900d-d5f5bdbbdca2	dk					uuid:12094b4d-e479-4077-900d-d5f5bdbbdca2	na_already_convinced					uuid:12094b4d-e479-4077-900d-d5f5bdbbdca2	unknown					uuid:12094b4d-e479-4077-900d-d5f5bdbbdca2
uuid:12181857-606d-4be5-8fde-970983e2d8a8	yes	no	1	yes	yes	2651	Eg		female	na	No	post	yes	post	1	46	Yes	40_49	yes	yes	999	yes	close	yes	uuid:12181857-606d-4be5-8fde-970983e2d8a8	dk					uuid:12181857-606d-4be5-8fde-970983e2d8a8	action					uuid:12181857-606d-4be5-8fde-970983e2d8a8	na_already_convinced					uuid:12181857-606d-4be5-8fde-970983e2d8a8	iftreat					uuid:12181857-606d-4be5-8fde-970983e2d8a8
uuid:122b8271-e73c-4d89-842a-aeb316094441	dk	dk	3	dk	yes	146	Un	Fgf	male	dk	Finish_primary	post	yes	school	3	22	No	18_29	yes	yes	999	no	close	yes	uuid:122b8271-e73c-4d89-842a-aeb316094441	pregnant					uuid:122b8271-e73c-4d89-842a-aeb316094441	na					uuid:122b8271-e73c-4d89-842a-aeb316094441	side_effect					uuid:122b8271-e73c-4d89-842a-aeb316094441	iftreat					uuid:122b8271-e73c-4d89-842a-aeb316094441
uuid:12471947-baee-44a6-ba5b-e62a06e21fa0	yes	no	4	yes	yes	334	A b		female	na	No	post	yes	post	2	36	Yes	30_39	yes	yes	999	yes	close	yes	uuid:12471947-baee-44a6-ba5b-e62a06e21fa0	pregnant					uuid:12471947-baee-44a6-ba5b-e62a06e21fa0	action					uuid:12471947-baee-44a6-ba5b-e62a06e21fa0	uk					uuid:12471947-baee-44a6-ba5b-e62a06e21fa0	unknown					uuid:12471947-baee-44a6-ba5b-e62a06e21fa0
uuid:1289057d-b63f-4696-bdcc-42ffbe85a669	yes	dk	4	yes	yes	2721	Wc	Pas trop bien	female	na	Primary	post	yes	post	3	20	Yes	18_29	yes	yes	999	yes	close	yes	uuid:1289057d-b63f-4696-bdcc-42ffbe85a669	pregnant					uuid:1289057d-b63f-4696-bdcc-42ffbe85a669	action					uuid:1289057d-b63f-4696-bdcc-42ffbe85a669	help_me					uuid:1289057d-b63f-4696-bdcc-42ffbe85a669	clean_water					uuid:1289057d-b63f-4696-bdcc-42ffbe85a669
uuid:12891606-9232-4007-8c19-e7334c54126e	yes	no	2	yes	yes	68	ra		male	na	No	post	yes	post	2	76	Yes	70_79	yes	yes	999	yes	not_too_far	yes	uuid:12891606-9232-4007-8c19-e7334c54126e	dk					uuid:12891606-9232-4007-8c19-e7334c54126e	action					uuid:12891606-9232-4007-8c19-e7334c54126e	uk					uuid:12891606-9232-4007-8c19-e7334c54126e	unknown					uuid:12891606-9232-4007-8c19-e7334c54126e
uuid:12922a69-daa9-48a9-8a02-84789d5f8697	yes	no	1	yes	yes	43	Ec		female	na	No	post	yes	post	1	48	Yes	40_49	yes	yes	999	yes	close	yes	uuid:12922a69-daa9-48a9-8a02-84789d5f8697	dk					uuid:12922a69-daa9-48a9-8a02-84789d5f8697	not_eat					uuid:12922a69-daa9-48a9-8a02-84789d5f8697	na_already_convinced					uuid:12922a69-daa9-48a9-8a02-84789d5f8697	iftreat					uuid:12922a69-daa9-48a9-8a02-84789d5f8697
uuid:12a1eaab-5a4d-437b-9dde-bb21e6f25fd8	yes	no	1	yes	yes	49	Le		male	na	Primary	post	yes	post	1	20	Yes	18_29	yes	yes	999	no	not_too_far	yes	uuid:12a1eaab-5a4d-437b-9dde-bb21e6f25fd8	dk					uuid:12a1eaab-5a4d-437b-9dde-bb21e6f25fd8	na					uuid:12a1eaab-5a4d-437b-9dde-bb21e6f25fd8	na_already_convinced					uuid:12a1eaab-5a4d-437b-9dde-bb21e6f25fd8	iftreat					uuid:12a1eaab-5a4d-437b-9dde-bb21e6f25fd8
uuid:12bee327-af76-477b-a62e-3167f680dc04	yes	no	2	yes	yes	957	nr		female	na	Primary	post	yes	post	2	32	Yes	30_39	yes	yes	999	no	close	yes	uuid:12bee327-af76-477b-a62e-3167f680dc04	pregnant					uuid:12bee327-af76-477b-a62e-3167f680dc04	na					uuid:12bee327-af76-477b-a62e-3167f680dc04	na_already_convinced					uuid:12bee327-af76-477b-a62e-3167f680dc04	unknown					uuid:12bee327-af76-477b-a62e-3167f680dc04
uuid:12dbdb4c-9668-497e-8514-5820d05e1064	dk	dk	3	yes	dk	852	Ca	Bfv	female	dk	Finish_primary	home	yes	home	3	39	Yes	30_39	yes	yes	999	yes	dk	yes	uuid:12dbdb4c-9668-497e-8514-5820d05e1064	pregnant					uuid:12dbdb4c-9668-497e-8514-5820d05e1064	dk					uuid:12dbdb4c-9668-497e-8514-5820d05e1064	help_family					uuid:12dbdb4c-9668-497e-8514-5820d05e1064	unknown					uuid:12dbdb4c-9668-497e-8514-5820d05e1064
uuid:130c8a37-7865-4483-b4ff-dedb80bf10da	na_not_aware_of_post	dk	4	dk	na	2554	J.j	Hh	female	na	Some_secondary	na	no	na	999	28	Yes	18_29	yes	no	999	no	na_not_aware_post	no	uuid:130c8a37-7865-4483-b4ff-dedb80bf10da	pregnant					uuid:130c8a37-7865-4483-b4ff-dedb80bf10da	na					uuid:130c8a37-7865-4483-b4ff-dedb80bf10da	other					uuid:130c8a37-7865-4483-b4ff-dedb80bf10da	clean_water					uuid:130c8a37-7865-4483-b4ff-dedb80bf10da
uuid:1314efa1-94a6-4c0c-9fe2-20e51e07ae3d	yes	no	5	yes	yes	241	Fd		male	1	Finish_secondary	post	yes	post	2	30	Yes	30_39	yes	yes	999	no	close	yes	uuid:1314efa1-94a6-4c0c-9fe2-20e51e07ae3d	pregnant					uuid:1314efa1-94a6-4c0c-9fe2-20e51e07ae3d	na					uuid:1314efa1-94a6-4c0c-9fe2-20e51e07ae3d	na_already_convinced					uuid:1314efa1-94a6-4c0c-9fe2-20e51e07ae3d	bednets					uuid:1314efa1-94a6-4c0c-9fe2-20e51e07ae3d
uuid:132976ef-df65-42b6-a18b-edf9d6166f99	yes	no	5	yes	yes	1016	Mv		female	na	Some_secondary	post	yes	post	2	18	Yes	18_29	yes	yes	999	no	close	yes	uuid:132976ef-df65-42b6-a18b-edf9d6166f99	pregnant					uuid:132976ef-df65-42b6-a18b-edf9d6166f99	na					uuid:132976ef-df65-42b6-a18b-edf9d6166f99	side_effect					uuid:132976ef-df65-42b6-a18b-edf9d6166f99	iftreat					uuid:132976ef-df65-42b6-a18b-edf9d6166f99
uuid:13552ff3-0835-4b03-a393-04f1850cb1b6	yes	no	1	yes	yes	50	Km		male	na	Some_secondary	post	yes	post	1	18	Yes	18_29	yes	yes	999	no	close	yes	uuid:13552ff3-0835-4b03-a393-04f1850cb1b6	dk					uuid:13552ff3-0835-4b03-a393-04f1850cb1b6	na					uuid:13552ff3-0835-4b03-a393-04f1850cb1b6	na_already_convinced					uuid:13552ff3-0835-4b03-a393-04f1850cb1b6	clean_water					uuid:13552ff3-0835-4b03-a393-04f1850cb1b6
uuid:135d0ccd-0395-4a72-a2ad-400c957c9bde	yes	no	5	yes	yes	2705	Ss	Ok	female	na	No	post	no	post	2	60	Yes	60_69	yes	yes	2	no	not_too_far	yes	uuid:135d0ccd-0395-4a72-a2ad-400c957c9bde	pregnant					uuid:135d0ccd-0395-4a72-a2ad-400c957c9bde	na					uuid:135d0ccd-0395-4a72-a2ad-400c957c9bde	uk					uuid:135d0ccd-0395-4a72-a2ad-400c957c9bde	clean_water					uuid:135d0ccd-0395-4a72-a2ad-400c957c9bde
uuid:13eb0957-a46d-4e9b-9ebc-e61b357cac85	yes	no	1	yes	yes	297	Lm		female	na	Some_secondary	post	yes	post	1	18	Yes	18_29	yes	yes	999	no	close	yes	uuid:13eb0957-a46d-4e9b-9ebc-e61b357cac85	pregnant					uuid:13eb0957-a46d-4e9b-9ebc-e61b357cac85	na					uuid:13eb0957-a46d-4e9b-9ebc-e61b357cac85	na_already_convinced					uuid:13eb0957-a46d-4e9b-9ebc-e61b357cac85	iftreat					uuid:13eb0957-a46d-4e9b-9ebc-e61b357cac85
uuid:140cd0c3-417e-4aed-8092-414131772e29	yes	no	4	yes	yes	215	S b		female	na	Primary	post	yes	post	999	22	Yes	18_29	yes	yes	999	yes	far	yes	uuid:140cd0c3-417e-4aed-8092-414131772e29	Children_under_1					uuid:140cd0c3-417e-4aed-8092-414131772e29	dk					uuid:140cd0c3-417e-4aed-8092-414131772e29	help_me					uuid:140cd0c3-417e-4aed-8092-414131772e29	unknown					uuid:140cd0c3-417e-4aed-8092-414131772e29
uuid:140ff704-41cd-40b4-b528-2562faaee1cc	yes	no	2	yes	yes	330	jc		female	na	Primary	post	yes	post	3	32	Yes	30_39	yes	yes	999	yes	close	yes	uuid:140ff704-41cd-40b4-b528-2562faaee1cc	pregnant					uuid:140ff704-41cd-40b4-b528-2562faaee1cc	dk					uuid:140ff704-41cd-40b4-b528-2562faaee1cc	uk					uuid:140ff704-41cd-40b4-b528-2562faaee1cc	bednets					uuid:140ff704-41cd-40b4-b528-2562faaee1cc
uuid:14318eaf-abd8-4d71-9ac5-f6a1d23af6a4	yes	no	5	yes	yes	243	Ca		male	na	Primary	post	yes	post	3	75	Yes	70_79	yes	yes	999	no	close	yes	uuid:14318eaf-abd8-4d71-9ac5-f6a1d23af6a4	pregnant					uuid:14318eaf-abd8-4d71-9ac5-f6a1d23af6a4	na					uuid:14318eaf-abd8-4d71-9ac5-f6a1d23af6a4	help_me					uuid:14318eaf-abd8-4d71-9ac5-f6a1d23af6a4	bednets					uuid:14318eaf-abd8-4d71-9ac5-f6a1d23af6a4
uuid:145326e5-8d43-462f-a35e-b52a168ae9fb	yes	no	5	yes	yes	212	Fl		female	na	Some_secondary	post	yes	post	2	22	Yes	18_29	yes	yes	999	no	close	yes	uuid:145326e5-8d43-462f-a35e-b52a168ae9fb	pregnant					uuid:145326e5-8d43-462f-a35e-b52a168ae9fb	na					uuid:145326e5-8d43-462f-a35e-b52a168ae9fb	help_me					uuid:145326e5-8d43-462f-a35e-b52a168ae9fb	bednets					uuid:145326e5-8d43-462f-a35e-b52a168ae9fb
uuid:145c9d8f-d825-4b6d-a4b3-e3e3581bbad6	yes	yes	2	yes	yes	99	cr		male	2	No	post	yes	post	3	38	Yes	30_39	yes	yes	999	no	close	yes	uuid:145c9d8f-d825-4b6d-a4b3-e3e3581bbad6	pregnant					uuid:145c9d8f-d825-4b6d-a4b3-e3e3581bbad6	na					uuid:145c9d8f-d825-4b6d-a4b3-e3e3581bbad6	uk					uuid:145c9d8f-d825-4b6d-a4b3-e3e3581bbad6	unknown					uuid:145c9d8f-d825-4b6d-a4b3-e3e3581bbad6
uuid:14a144d7-fa96-4086-b5b4-85e8f63d210c	yes	no	1	yes	no	2608	jj		female	na	No	post	yes	post	1	22	Yes	18_29	yes	yes	2	no	close	yes	uuid:14a144d7-fa96-4086-b5b4-85e8f63d210c	pregnant					uuid:14a144d7-fa96-4086-b5b4-85e8f63d210c	na					uuid:14a144d7-fa96-4086-b5b4-85e8f63d210c	na_already_convinced					uuid:14a144d7-fa96-4086-b5b4-85e8f63d210c	iftreat					uuid:14a144d7-fa96-4086-b5b4-85e8f63d210c
uuid:14a7be19-7366-44da-970b-a4d3fa359211	yes	no	5	yes	yes	2716	Rp		male	na	Some_secondary	post	yes	post	2	30	Yes	30_39	yes	yes	999	no	close	yes	uuid:14a7be19-7366-44da-970b-a4d3fa359211	pregnant					uuid:14a7be19-7366-44da-970b-a4d3fa359211	na					uuid:14a7be19-7366-44da-970b-a4d3fa359211	help_me					uuid:14a7be19-7366-44da-970b-a4d3fa359211	clean_water					uuid:14a7be19-7366-44da-970b-a4d3fa359211
uuid:14abf694-69f1-40c3-a922-d481b1e64126	yes	no	5	yes	yes	1025	Mr		male	na	No	post	yes	post	1	38	Yes	30_39	yes	yes	999	no	close	yes	uuid:14abf694-69f1-40c3-a922-d481b1e64126	dk					uuid:14abf694-69f1-40c3-a922-d481b1e64126	na					uuid:14abf694-69f1-40c3-a922-d481b1e64126	uk					uuid:14abf694-69f1-40c3-a922-d481b1e64126	clean_water					uuid:14abf694-69f1-40c3-a922-d481b1e64126
uuid:1509f6ed-4cf6-4764-92b9-a2185cc92a75	yes	no	5	yes	yes	280	Ej		female	na	Some_secondary	post	yes	post	3	37	Yes	30_39	yes	yes	1	no	close	yes	uuid:1509f6ed-4cf6-4764-92b9-a2185cc92a75	Children_under_1					uuid:1509f6ed-4cf6-4764-92b9-a2185cc92a75	na					uuid:1509f6ed-4cf6-4764-92b9-a2185cc92a75	help_me					uuid:1509f6ed-4cf6-4764-92b9-a2185cc92a75	clean_water					uuid:1509f6ed-4cf6-4764-92b9-a2185cc92a75
uuid:150fc995-ad2e-4c7a-8cd7-8fda48ef368c	yes	no	5	yes	yes	400	mv		female	na	Some_secondary	post	yes	post	2	24	Yes	18_29	yes	yes	999	no	close	yes	uuid:150fc995-ad2e-4c7a-8cd7-8fda48ef368c	pregnant					uuid:150fc995-ad2e-4c7a-8cd7-8fda48ef368c	na					uuid:150fc995-ad2e-4c7a-8cd7-8fda48ef368c	na_already_convinced					uuid:150fc995-ad2e-4c7a-8cd7-8fda48ef368c	bednets					uuid:150fc995-ad2e-4c7a-8cd7-8fda48ef368c
uuid:15478d27-ca2b-4b15-bcd5-399ad102864e	yes	no	2	yes	yes	336	fr		female	na	Some_secondary	post	yes	post	2	40	Yes	40_49	yes	yes	999	no	close	yes	uuid:15478d27-ca2b-4b15-bcd5-399ad102864e	pregnant					uuid:15478d27-ca2b-4b15-bcd5-399ad102864e	na					uuid:15478d27-ca2b-4b15-bcd5-399ad102864e	uk					uuid:15478d27-ca2b-4b15-bcd5-399ad102864e	unknown					uuid:15478d27-ca2b-4b15-bcd5-399ad102864e
uuid:156e4484-0e9f-4248-9771-0343809d9b16	yes	no	5	yes	yes	396	ra		male	na	Primary	post	yes	post	2	20	Yes	18_29	yes	yes	999	no	close	yes	uuid:156e4484-0e9f-4248-9771-0343809d9b16	pregnant					uuid:156e4484-0e9f-4248-9771-0343809d9b16	na					uuid:156e4484-0e9f-4248-9771-0343809d9b16	na_already_convinced					uuid:156e4484-0e9f-4248-9771-0343809d9b16	clean_water					uuid:156e4484-0e9f-4248-9771-0343809d9b16
uuid:15ca7b96-8427-4a62-8705-9b1abeae65ee	yes	no	4	yes	yes	151	K c		female	na	Primary	post	yes	post	1	30	Yes	30_39	yes	yes	999	yes	not_too_far	yes	uuid:15ca7b96-8427-4a62-8705-9b1abeae65ee	Sick					uuid:15ca7b96-8427-4a62-8705-9b1abeae65ee	action					uuid:15ca7b96-8427-4a62-8705-9b1abeae65ee	help_me					uuid:15ca7b96-8427-4a62-8705-9b1abeae65ee	unknown					uuid:15ca7b96-8427-4a62-8705-9b1abeae65ee
uuid:15dc907c-35e2-4d05-8d2a-49b2ea997259	yes	no	4	yes	yes	603	Sp	Ok	female	dk	No	post	no	post	999	50	Yes	50_59	yes	yes	999	no	not_too_far	no	uuid:15dc907c-35e2-4d05-8d2a-49b2ea997259	pregnant					uuid:15dc907c-35e2-4d05-8d2a-49b2ea997259	na					uuid:15dc907c-35e2-4d05-8d2a-49b2ea997259	help_me					uuid:15dc907c-35e2-4d05-8d2a-49b2ea997259	clean_water					uuid:15dc907c-35e2-4d05-8d2a-49b2ea997259
uuid:15edacb3-521c-46a0-8267-47780d6f4cd1	dk	dk	4	yes	na	185	C d		female	na	Some_secondary	na	yes	na	1	19	Yes	18_29	no	na	999	na	dk	no	uuid:15edacb3-521c-46a0-8267-47780d6f4cd1	pregnant					uuid:15edacb3-521c-46a0-8267-47780d6f4cd1	na					uuid:15edacb3-521c-46a0-8267-47780d6f4cd1	help_me					uuid:15edacb3-521c-46a0-8267-47780d6f4cd1	n/a					uuid:15edacb3-521c-46a0-8267-47780d6f4cd1
uuid:167cb8da-650a-4ef3-af07-f02528304e66	yes	no	1	yes	yes	283	Ce	Lot yo pat bwel nan commune sa	female	na	Finish_primary	home	yes	post	2	72	Yes	70_79	yes	yes	999	no	close	yes	uuid:167cb8da-650a-4ef3-af07-f02528304e66	pregnant					uuid:167cb8da-650a-4ef3-af07-f02528304e66	na					uuid:167cb8da-650a-4ef3-af07-f02528304e66	na_already_convinced					uuid:167cb8da-650a-4ef3-af07-f02528304e66	clean_water					uuid:167cb8da-650a-4ef3-af07-f02528304e66
uuid:168b9467-472a-4b4e-a18b-f2738eb5eb0b	yes	no	4	yes	yes	206	R j		female	na	No	post	yes	post	1	60	Yes	60_69	yes	yes	999	no	not_too_far	yes	uuid:168b9467-472a-4b4e-a18b-f2738eb5eb0b	pregnant					uuid:168b9467-472a-4b4e-a18b-f2738eb5eb0b	na					uuid:168b9467-472a-4b4e-a18b-f2738eb5eb0b	uk					uuid:168b9467-472a-4b4e-a18b-f2738eb5eb0b	bednets					uuid:168b9467-472a-4b4e-a18b-f2738eb5eb0b
uuid:169f99b1-3587-4b9d-a0a0-d4b5fccf8b1d	yes	no	3	yes	yes	109	Ic	Vdf	female	1	Primary	post	no	post	2	23	Yes	18_29	yes	yes	999	no	close	yes	uuid:169f99b1-3587-4b9d-a0a0-d4b5fccf8b1d	pregnant					uuid:169f99b1-3587-4b9d-a0a0-d4b5fccf8b1d	dk					uuid:169f99b1-3587-4b9d-a0a0-d4b5fccf8b1d	help_me					uuid:169f99b1-3587-4b9d-a0a0-d4b5fccf8b1d	iftreat					uuid:169f99b1-3587-4b9d-a0a0-d4b5fccf8b1d
uuid:174d8c8a-6dcc-4b53-a201-0ce19a16f339	na_not_aware_of_post	dk	5	yes	na	411	Nt		female	na	Primary	na	no	na	0	18	Yes	18_29	yes	na	999	na	na_not_aware_post	yes	uuid:174d8c8a-6dcc-4b53-a201-0ce19a16f339	pregnant					uuid:174d8c8a-6dcc-4b53-a201-0ce19a16f339	na					uuid:174d8c8a-6dcc-4b53-a201-0ce19a16f339	help_family					uuid:174d8c8a-6dcc-4b53-a201-0ce19a16f339	iftreat					uuid:174d8c8a-6dcc-4b53-a201-0ce19a16f339
uuid:1813b801-37fe-4bb5-a7ee-d9a12a339060	yes	no	2	yes	yes	554	ra		female	na	Primary	post	yes	post	2	33	Yes	30_39	yes	yes	999	no	close	yes	uuid:1813b801-37fe-4bb5-a7ee-d9a12a339060	pregnant					uuid:1813b801-37fe-4bb5-a7ee-d9a12a339060	na					uuid:1813b801-37fe-4bb5-a7ee-d9a12a339060	na_already_convinced					uuid:1813b801-37fe-4bb5-a7ee-d9a12a339060	unknown					uuid:1813b801-37fe-4bb5-a7ee-d9a12a339060
uuid:182a16a7-782d-40fd-a074-bbead3b34b44	yes	no	2	yes	no	2838	la		male	na	No	post	yes	post	2	74	Yes	70_79	yes	yes	999	no	close	yes	uuid:182a16a7-782d-40fd-a074-bbead3b34b44	pregnant					uuid:182a16a7-782d-40fd-a074-bbead3b34b44	na					uuid:182a16a7-782d-40fd-a074-bbead3b34b44	na_already_convinced					uuid:182a16a7-782d-40fd-a074-bbead3b34b44	unknown					uuid:182a16a7-782d-40fd-a074-bbead3b34b44
uuid:186957fe-9c60-4e37-b453-45a9b768b0cf	yes	no	5	yes	yes	1008	Ga		female	na	Primary	home	yes	home	2	44	Yes	40_49	yes	yes	999	no	close	yes	uuid:186957fe-9c60-4e37-b453-45a9b768b0cf	pregnant					uuid:186957fe-9c60-4e37-b453-45a9b768b0cf	na					uuid:186957fe-9c60-4e37-b453-45a9b768b0cf	side_effect					uuid:186957fe-9c60-4e37-b453-45a9b768b0cf	unknown					uuid:186957fe-9c60-4e37-b453-45a9b768b0cf
uuid:189035a0-415f-496e-9702-f6ce3ca02fc2	yes	no	5	yes	yes	205	Za	Lot moun yo pala	female	dk	No	school	yes	school	3	41	Yes	40_49	yes	yes	999	no	not_too_far	yes	uuid:189035a0-415f-496e-9702-f6ce3ca02fc2	pregnant					uuid:189035a0-415f-496e-9702-f6ce3ca02fc2	dk					uuid:189035a0-415f-496e-9702-f6ce3ca02fc2	help_me					uuid:189035a0-415f-496e-9702-f6ce3ca02fc2	clean_water					uuid:189035a0-415f-496e-9702-f6ce3ca02fc2
uuid:18a26ac8-c993-4aa6-935d-2997a95d812f	yes	no	5	yes	yes	1012	Bn		male	na	Some_secondary	post	yes	post	2	19	Yes	18_29	yes	yes	999	no	not_too_far	yes	uuid:18a26ac8-c993-4aa6-935d-2997a95d812f	pregnant					uuid:18a26ac8-c993-4aa6-935d-2997a95d812f	na					uuid:18a26ac8-c993-4aa6-935d-2997a95d812f	help_me					uuid:18a26ac8-c993-4aa6-935d-2997a95d812f	bednets					uuid:18a26ac8-c993-4aa6-935d-2997a95d812f
uuid:18b51de6-d383-4591-a5e6-2958d87f987a	yes	no	4	yes	yes	385	C.d	Gfdgh	female	na	Primary	post	yes	post	2	27	Yes	18_29	yes	yes	999	no	not_too_far	yes	uuid:18b51de6-d383-4591-a5e6-2958d87f987a	dk					uuid:18b51de6-d383-4591-a5e6-2958d87f987a	na					uuid:18b51de6-d383-4591-a5e6-2958d87f987a	uk					uuid:18b51de6-d383-4591-a5e6-2958d87f987a	unknown					uuid:18b51de6-d383-4591-a5e6-2958d87f987a
uuid:18de8dc8-069e-4af1-976e-5a336187194a	yes	no	1	yes	yes	2653	Fp	Sa fè plizyè ka lnsa. Avan yo te pranl nan pos, akoz li pat fè yo byen, dezyèm fwa, yo pranl, yal bwèl lakay yo. Lè yo pral domi...	female	na	Finish_primary	home	yes	post	1	40	Yes	40_49	yes	yes	999	no	close	yes	uuid:18de8dc8-069e-4af1-976e-5a336187194a	pregnant					uuid:18de8dc8-069e-4af1-976e-5a336187194a	na					uuid:18de8dc8-069e-4af1-976e-5a336187194a	na_already_convinced					uuid:18de8dc8-069e-4af1-976e-5a336187194a	clean_water					uuid:18de8dc8-069e-4af1-976e-5a336187194a
uuid:19148d42-fe12-42ec-bdfa-2286d707bb2c	yes	yes	4	yes	no	348	Ml	Ok	female	na	Primary	post	yes	post	3	67	Yes	60_69	yes	yes	5	no	not_too_far	yes	uuid:19148d42-fe12-42ec-bdfa-2286d707bb2c	pregnant					uuid:19148d42-fe12-42ec-bdfa-2286d707bb2c	na					uuid:19148d42-fe12-42ec-bdfa-2286d707bb2c	help_me					uuid:19148d42-fe12-42ec-bdfa-2286d707bb2c	iftreat					uuid:19148d42-fe12-42ec-bdfa-2286d707bb2c
uuid:1921efad-85ed-41d7-b54f-65af376ac79c	yes	no	5	yes	yes	409	Fj		male	na	No	post	yes	post	3	55	Yes	50_59	yes	yes	999	no	close	yes	uuid:1921efad-85ed-41d7-b54f-65af376ac79c	pregnant					uuid:1921efad-85ed-41d7-b54f-65af376ac79c	na					uuid:1921efad-85ed-41d7-b54f-65af376ac79c	na_already_convinced					uuid:1921efad-85ed-41d7-b54f-65af376ac79c	clean_water					uuid:1921efad-85ed-41d7-b54f-65af376ac79c
uuid:1930d6c2-4ab7-419b-838d-cdf558797eba	yes	no	3	yes	yes	133	Eb	Fgf	female	1	Finish_primary	post	yes	post	3	55	Yes	50_59	yes	yes	999	no	not_too_far	yes	uuid:1930d6c2-4ab7-419b-838d-cdf558797eba	pregnant					uuid:1930d6c2-4ab7-419b-838d-cdf558797eba	na					uuid:1930d6c2-4ab7-419b-838d-cdf558797eba	help_me					uuid:1930d6c2-4ab7-419b-838d-cdf558797eba	unknown					uuid:1930d6c2-4ab7-419b-838d-cdf558797eba
uuid:193ccf0a-a983-4f61-963c-12bc3ec4bb41	yes	no	1	yes	yes	20	Dm		female	na	No	post	yes	post	3	999	Yes	80_89	yes	yes	999	no	close	yes	uuid:193ccf0a-a983-4f61-963c-12bc3ec4bb41	dk					uuid:193ccf0a-a983-4f61-963c-12bc3ec4bb41	na					uuid:193ccf0a-a983-4f61-963c-12bc3ec4bb41	na_already_convinced					uuid:193ccf0a-a983-4f61-963c-12bc3ec4bb41	unknown					uuid:193ccf0a-a983-4f61-963c-12bc3ec4bb41
uuid:19d6cf20-c476-462d-bf11-c8095c8172f7	yes	no	2	yes	yes	953	ob		female	na	Primary	post	yes	post	2	23	Yes	18_29	yes	yes	999	no	close	yes	uuid:19d6cf20-c476-462d-bf11-c8095c8172f7	pregnant					uuid:19d6cf20-c476-462d-bf11-c8095c8172f7	na					uuid:19d6cf20-c476-462d-bf11-c8095c8172f7	na_already_convinced					uuid:19d6cf20-c476-462d-bf11-c8095c8172f7	unknown					uuid:19d6cf20-c476-462d-bf11-c8095c8172f7
uuid:1a036b21-5c46-480b-b27b-f4a535f18b78	yes	no	2	yes	yes	2782	aa		female	na	Some_secondary	post	yes	post	2	28	Yes	18_29	yes	yes	999	yes	close	yes	uuid:1a036b21-5c46-480b-b27b-f4a535f18b78	pregnant					uuid:1a036b21-5c46-480b-b27b-f4a535f18b78	dk					uuid:1a036b21-5c46-480b-b27b-f4a535f18b78	uk					uuid:1a036b21-5c46-480b-b27b-f4a535f18b78	unknown					uuid:1a036b21-5c46-480b-b27b-f4a535f18b78
uuid:1a0eab9b-e227-4f01-a8ab-5a54b2bfe238	yes	yes	4	yes	yes	161	P c		female	na	Primary	post	yes	post	2	29	Yes	18_29	yes	yes	999	yes	close	yes	uuid:1a0eab9b-e227-4f01-a8ab-5a54b2bfe238	pregnant					uuid:1a0eab9b-e227-4f01-a8ab-5a54b2bfe238	action					uuid:1a0eab9b-e227-4f01-a8ab-5a54b2bfe238	help_me					uuid:1a0eab9b-e227-4f01-a8ab-5a54b2bfe238	bednets					uuid:1a0eab9b-e227-4f01-a8ab-5a54b2bfe238
uuid:1a3b7eed-8295-4947-8c01-2b548aeaf021	yes	no	1	yes	na	281	De		female	na	Some_secondary	na	yes	na	1	28	Yes	18_29	yes	na	999	na	not_too_far	no	uuid:1a3b7eed-8295-4947-8c01-2b548aeaf021	pregnant					uuid:1a3b7eed-8295-4947-8c01-2b548aeaf021	na					uuid:1a3b7eed-8295-4947-8c01-2b548aeaf021	na_already_convinced					uuid:1a3b7eed-8295-4947-8c01-2b548aeaf021	iftreat					uuid:1a3b7eed-8295-4947-8c01-2b548aeaf021
uuid:1a3c5c8e-dbaa-4e8a-a70e-702d7ee73bda	yes	no	4	yes	yes	179	O d		male	na	Some_secondary	post	yes	post	1	25	Yes	18_29	yes	yes	999	no	close	yes	uuid:1a3c5c8e-dbaa-4e8a-a70e-702d7ee73bda	pregnant					uuid:1a3c5c8e-dbaa-4e8a-a70e-702d7ee73bda	na					uuid:1a3c5c8e-dbaa-4e8a-a70e-702d7ee73bda	help_family					uuid:1a3c5c8e-dbaa-4e8a-a70e-702d7ee73bda	bednets					uuid:1a3c5c8e-dbaa-4e8a-a70e-702d7ee73bda
uuid:1a534127-9484-44ff-b235-a4c33d729557	yes	no	1	yes	na	29	Ae	Y	female	na	Finish_secondary	na	yes	na	2	27	Yes	18_29	yes	na	999	na	close	no	uuid:1a534127-9484-44ff-b235-a4c33d729557	pregnant					uuid:1a534127-9484-44ff-b235-a4c33d729557	na					uuid:1a534127-9484-44ff-b235-a4c33d729557	na_already_convinced					uuid:1a534127-9484-44ff-b235-a4c33d729557	clean_water					uuid:1a534127-9484-44ff-b235-a4c33d729557
uuid:1a84bf4e-85a5-417a-850e-a959894524f6	yes	no	4	yes	yes	217	C m		female	na	No	post	yes	post	2	57	Yes	50_59	yes	yes	999	no	not_too_far	yes	uuid:1a84bf4e-85a5-417a-850e-a959894524f6	dk					uuid:1a84bf4e-85a5-417a-850e-a959894524f6	na					uuid:1a84bf4e-85a5-417a-850e-a959894524f6	uk					uuid:1a84bf4e-85a5-417a-850e-a959894524f6	unknown					uuid:1a84bf4e-85a5-417a-850e-a959894524f6
uuid:1a9d55cb-dbe7-48c2-b11f-de210688d13b	yes	no	5	yes	no	1819	Pr		female	na	Primary	post	yes	post	3	43	Yes	40_49	no	yes	999	no	close	yes	uuid:1a9d55cb-dbe7-48c2-b11f-de210688d13b	pregnant					uuid:1a9d55cb-dbe7-48c2-b11f-de210688d13b	na					uuid:1a9d55cb-dbe7-48c2-b11f-de210688d13b	na_already_convinced					uuid:1a9d55cb-dbe7-48c2-b11f-de210688d13b	n/a					uuid:1a9d55cb-dbe7-48c2-b11f-de210688d13b
uuid:1abca824-78c6-4e8b-acfb-9f31fe05c128	dk	dk	2	dk	na	95	jv	d4 li pat bwe medicament paske li te gentan fini.	female	na	No	na	yes	na	2	30	Yes	30_39	yes	na	999	na	dk	no	uuid:1abca824-78c6-4e8b-acfb-9f31fe05c128	pregnant					uuid:1abca824-78c6-4e8b-acfb-9f31fe05c128	na					uuid:1abca824-78c6-4e8b-acfb-9f31fe05c128	uk					uuid:1abca824-78c6-4e8b-acfb-9f31fe05c128	clean_water					uuid:1abca824-78c6-4e8b-acfb-9f31fe05c128
uuid:1b2a2981-598b-4d39-8be1-9a99a752cf7d	yes	no	1	yes	yes	2621	Cl	Mouch bay li tou...	female	na	Some_secondary	school	yes	school	2	18	Yes	18_29	yes	yes	5	yes	na_not_aware_post	yes	uuid:1b2a2981-598b-4d39-8be1-9a99a752cf7d	pregnant					uuid:1b2a2981-598b-4d39-8be1-9a99a752cf7d	dk					uuid:1b2a2981-598b-4d39-8be1-9a99a752cf7d	na_already_convinced					uuid:1b2a2981-598b-4d39-8be1-9a99a752cf7d	bednets					uuid:1b2a2981-598b-4d39-8be1-9a99a752cf7d
uuid:1b316481-bd7b-4cbb-a428-5a85f91a8987	yes	no	3	yes	yes	631	Mm	Gtn	male	2	No	post	dk	post	999	84	No	80_89	no	yes	999	no	close	yes	uuid:1b316481-bd7b-4cbb-a428-5a85f91a8987	dk					uuid:1b316481-bd7b-4cbb-a428-5a85f91a8987	na					uuid:1b316481-bd7b-4cbb-a428-5a85f91a8987	help_me					uuid:1b316481-bd7b-4cbb-a428-5a85f91a8987	n/a					uuid:1b316481-bd7b-4cbb-a428-5a85f91a8987
uuid:1b37892e-ab08-442b-9049-447359522ae3	dk	dk	4	yes	na	160	E j		male	na	Primary	na	no	na	999	36	Yes	30_39	yes	na	999	na	dk	no	uuid:1b37892e-ab08-442b-9049-447359522ae3	pregnant					uuid:1b37892e-ab08-442b-9049-447359522ae3	na					uuid:1b37892e-ab08-442b-9049-447359522ae3	uk					uuid:1b37892e-ab08-442b-9049-447359522ae3	unknown					uuid:1b37892e-ab08-442b-9049-447359522ae3
uuid:1b4d8b5b-c3d8-45eb-822f-7c9f86f20d61	yes	no	4	dk	yes	2516	O.d	Gd	female	na	No	post	yes	post	1	42	Yes	40_49	yes	yes	999	no	close	yes	uuid:1b4d8b5b-c3d8-45eb-822f-7c9f86f20d61	pregnant					uuid:1b4d8b5b-c3d8-45eb-822f-7c9f86f20d61	dk					uuid:1b4d8b5b-c3d8-45eb-822f-7c9f86f20d61	uk					uuid:1b4d8b5b-c3d8-45eb-822f-7c9f86f20d61	clean_water					uuid:1b4d8b5b-c3d8-45eb-822f-7c9f86f20d61
uuid:1b5983bc-ea0e-4952-b415-eed5d98b8bb8	yes	no	3	yes	yes	109	Vg	Hdug	female	1	No	post	yes	post	3	56	Yes	50_59	yes	yes	999	no	not_too_far	yes	uuid:1b5983bc-ea0e-4952-b415-eed5d98b8bb8	pregnant					uuid:1b5983bc-ea0e-4952-b415-eed5d98b8bb8	na					uuid:1b5983bc-ea0e-4952-b415-eed5d98b8bb8	help_family					uuid:1b5983bc-ea0e-4952-b415-eed5d98b8bb8	unknown					uuid:1b5983bc-ea0e-4952-b415-eed5d98b8bb8
uuid:1bb98019-0741-4c4c-ab43-9bc680e95a89	yes	no	2	yes	yes	151	mv		male	na	No	post	yes	post	3	70	Yes	70_79	yes	yes	999	no	close	yes	uuid:1bb98019-0741-4c4c-ab43-9bc680e95a89	pregnant					uuid:1bb98019-0741-4c4c-ab43-9bc680e95a89	na					uuid:1bb98019-0741-4c4c-ab43-9bc680e95a89	uk					uuid:1bb98019-0741-4c4c-ab43-9bc680e95a89	unknown					uuid:1bb98019-0741-4c4c-ab43-9bc680e95a89
uuid:1bdcfd33-5d09-405f-924a-93e67f7f0684	dk	dk	2	yes	na	65	wj		male	na	Primary	na	dk	na	999	45	Yes	40_49	yes	na	999	na	dk	no	uuid:1bdcfd33-5d09-405f-924a-93e67f7f0684	pregnant					uuid:1bdcfd33-5d09-405f-924a-93e67f7f0684	na					uuid:1bdcfd33-5d09-405f-924a-93e67f7f0684	side_effect					uuid:1bdcfd33-5d09-405f-924a-93e67f7f0684	bednets					uuid:1bdcfd33-5d09-405f-924a-93e67f7f0684
uuid:1be12e9d-20b6-4b40-bdd1-c3011541a02d	yes	no	1	yes	yes	28	Sa		male	na	Some_secondary	post	yes	post	1	25	Yes	18_29	yes	yes	999	yes	close	yes	uuid:1be12e9d-20b6-4b40-bdd1-c3011541a02d	pregnant					uuid:1be12e9d-20b6-4b40-bdd1-c3011541a02d	action					uuid:1be12e9d-20b6-4b40-bdd1-c3011541a02d	side_effect					uuid:1be12e9d-20b6-4b40-bdd1-c3011541a02d	clean_water					uuid:1be12e9d-20b6-4b40-bdd1-c3011541a02d
uuid:1c335f2a-8015-466e-a173-58eeaed0f77f	yes	no	1	yes	no	2601	ad		female	na	Primary	post	yes	post	1	72	Yes	70_79	yes	yes	999	no	not_too_far	yes	uuid:1c335f2a-8015-466e-a173-58eeaed0f77f	dk					uuid:1c335f2a-8015-466e-a173-58eeaed0f77f	na					uuid:1c335f2a-8015-466e-a173-58eeaed0f77f	na_already_convinced					uuid:1c335f2a-8015-466e-a173-58eeaed0f77f	unknown					uuid:1c335f2a-8015-466e-a173-58eeaed0f77f
uuid:1c42b66b-ce70-482a-ae96-ba77542d1b66	dk	dk	3	dk	na	108	Nf	Bfjc	female	dk	Finish_primary	na	no	na	2	23	Yes	18_29	yes	na	999	na	dk	no	uuid:1c42b66b-ce70-482a-ae96-ba77542d1b66	pregnant					uuid:1c42b66b-ce70-482a-ae96-ba77542d1b66	na					uuid:1c42b66b-ce70-482a-ae96-ba77542d1b66	side_effect					uuid:1c42b66b-ce70-482a-ae96-ba77542d1b66	unknown					uuid:1c42b66b-ce70-482a-ae96-ba77542d1b66
uuid:1c455050-7861-469f-b0c2-819bce7c167e	dk	dk	5	yes	na	153	pm	li t bliye le yo tap bay medikaman	female	dk	No	na	no	na	999	24	Yes	18_29	yes	na	999	na	dk	no	uuid:1c455050-7861-469f-b0c2-819bce7c167e	pregnant					uuid:1c455050-7861-469f-b0c2-819bce7c167e	na					uuid:1c455050-7861-469f-b0c2-819bce7c167e	help_me					uuid:1c455050-7861-469f-b0c2-819bce7c167e	clean_water					uuid:1c455050-7861-469f-b0c2-819bce7c167e
uuid:1c46d547-5107-439d-a203-e94a1e7dbe1c	yes	no	5	yes	yes	299	Sm		female	na	Some_secondary	post	yes	post	3	22	Yes	18_29	yes	yes	999	no	not_too_far	yes	uuid:1c46d547-5107-439d-a203-e94a1e7dbe1c	pregnant					uuid:1c46d547-5107-439d-a203-e94a1e7dbe1c	na					uuid:1c46d547-5107-439d-a203-e94a1e7dbe1c	side_effect					uuid:1c46d547-5107-439d-a203-e94a1e7dbe1c	clean_water					uuid:1c46d547-5107-439d-a203-e94a1e7dbe1c
uuid:1c8d753b-c31d-4c8d-b1ad-f0b487f7a1c5	yes	no	4	yes	yes	680	D.i	Yd	female	na	Some_secondary	post	yes	post	3	35	Yes	30_39	yes	yes	999	yes	close	yes	uuid:1c8d753b-c31d-4c8d-b1ad-f0b487f7a1c5	pregnant					uuid:1c8d753b-c31d-4c8d-b1ad-f0b487f7a1c5	action					uuid:1c8d753b-c31d-4c8d-b1ad-f0b487f7a1c5	other					uuid:1c8d753b-c31d-4c8d-b1ad-f0b487f7a1c5	bednets					uuid:1c8d753b-c31d-4c8d-b1ad-f0b487f7a1c5
uuid:1d2ff44c-d252-4a14-bccc-48abdebde346	yes	dk	4	yes	dk	2574	Drj	Sghj	male	na	Primary	post	yes	post	1	37	Yes	30_39	yes	yes	999	no	close	no	uuid:1d2ff44c-d252-4a14-bccc-48abdebde346	dk					uuid:1d2ff44c-d252-4a14-bccc-48abdebde346	na					uuid:1d2ff44c-d252-4a14-bccc-48abdebde346	help_me					uuid:1d2ff44c-d252-4a14-bccc-48abdebde346	clean_water					uuid:1d2ff44c-d252-4a14-bccc-48abdebde346
uuid:1d51dac8-a34c-4eef-8448-fa4eb406b881	yes	no	5	yes	yes	2716	Ml		female	na	No	post	yes	post	3	75	Yes	70_79	no	yes	999	no	close	yes	uuid:1d51dac8-a34c-4eef-8448-fa4eb406b881	dk					uuid:1d51dac8-a34c-4eef-8448-fa4eb406b881	na					uuid:1d51dac8-a34c-4eef-8448-fa4eb406b881	uk					uuid:1d51dac8-a34c-4eef-8448-fa4eb406b881	n/a					uuid:1d51dac8-a34c-4eef-8448-fa4eb406b881
uuid:1d5a8ad2-f879-4106-a536-34a5071b599d	na_not_aware_of_post	dk	4	yes	na	157	R n		female	na	No	na	no	na	999	26	No	18_29	yes	na	999	na	na_not_aware_post	no	uuid:1d5a8ad2-f879-4106-a536-34a5071b599d	dk					uuid:1d5a8ad2-f879-4106-a536-34a5071b599d	na					uuid:1d5a8ad2-f879-4106-a536-34a5071b599d	help_me					uuid:1d5a8ad2-f879-4106-a536-34a5071b599d	unknown					uuid:1d5a8ad2-f879-4106-a536-34a5071b599d
uuid:1d689673-6a2a-4585-b6bf-382bce6e3158	yes	no	2	yes	yes	2771	Ro		female	na	No	post	yes	post	2	52	Yes	50_59	yes	yes	999	no	close	yes	uuid:1d689673-6a2a-4585-b6bf-382bce6e3158	pregnant					uuid:1d689673-6a2a-4585-b6bf-382bce6e3158	na					uuid:1d689673-6a2a-4585-b6bf-382bce6e3158	side_effect					uuid:1d689673-6a2a-4585-b6bf-382bce6e3158	n/a					uuid:1d689673-6a2a-4585-b6bf-382bce6e3158
uuid:1d9558bd-2705-4ba2-91a6-8daf030b4f02	yes	no	5	yes	yes	299	Cs		female	na	No	post	yes	post	3	41	Yes	40_49	yes	yes	999	no	not_too_far	yes	uuid:1d9558bd-2705-4ba2-91a6-8daf030b4f02	pregnant					uuid:1d9558bd-2705-4ba2-91a6-8daf030b4f02	na					uuid:1d9558bd-2705-4ba2-91a6-8daf030b4f02	help_me					uuid:1d9558bd-2705-4ba2-91a6-8daf030b4f02	clean_water					uuid:1d9558bd-2705-4ba2-91a6-8daf030b4f02
uuid:1d9736e3-59df-44a8-ba29-48103b6fe4d7	yes	no	1	yes	no	2817	Dj		male	na	Primary	home	yes	post	2	38	Yes	30_39	yes	yes	999	yes	close	yes	uuid:1d9736e3-59df-44a8-ba29-48103b6fe4d7	Children_unk					uuid:1d9736e3-59df-44a8-ba29-48103b6fe4d7	action					uuid:1d9736e3-59df-44a8-ba29-48103b6fe4d7	na_already_convinced					uuid:1d9736e3-59df-44a8-ba29-48103b6fe4d7	unknown					uuid:1d9736e3-59df-44a8-ba29-48103b6fe4d7
uuid:1dacd7a6-2df8-4b34-a276-a41db41b7a34	yes	no	4	yes	yes	164	J n		female	na	Some_secondary	school	no	school	999	18	Yes	18_29	yes	yes	999	no	far	yes	uuid:1dacd7a6-2df8-4b34-a276-a41db41b7a34	pregnant					uuid:1dacd7a6-2df8-4b34-a276-a41db41b7a34	na					uuid:1dacd7a6-2df8-4b34-a276-a41db41b7a34	help_me					uuid:1dacd7a6-2df8-4b34-a276-a41db41b7a34	unknown					uuid:1dacd7a6-2df8-4b34-a276-a41db41b7a34
uuid:1db1cf86-5597-4599-91d0-34106a8431f1	dk	dk	3	dk	na	125	Cd	Hxv	female	dk	No	na	no	na	0	70	No	70_79	yes	na	999	na	dk	no	uuid:1db1cf86-5597-4599-91d0-34106a8431f1	other					uuid:1db1cf86-5597-4599-91d0-34106a8431f1	na					uuid:1db1cf86-5597-4599-91d0-34106a8431f1	side_effect					uuid:1db1cf86-5597-4599-91d0-34106a8431f1	unknown					uuid:1db1cf86-5597-4599-91d0-34106a8431f1
uuid:1e00fe5e-756c-42b2-b40e-476b19cc621e	dk	dk	2	yes	na	2846	fd		female	na	Primary	na	no	na	999	34	Yes	30_39	yes	na	999	na	dk	no	uuid:1e00fe5e-756c-42b2-b40e-476b19cc621e	pregnant					uuid:1e00fe5e-756c-42b2-b40e-476b19cc621e	na					uuid:1e00fe5e-756c-42b2-b40e-476b19cc621e	side_effect					uuid:1e00fe5e-756c-42b2-b40e-476b19cc621e	unknown					uuid:1e00fe5e-756c-42b2-b40e-476b19cc621e
uuid:1e015d36-6dda-4660-a5d5-a7a56769515b	yes	no	1	yes	yes	12	Yd		female	na	Some_secondary	post	yes	post	2	32	Yes	30_39	yes	yes	999	no	not_too_far	yes	uuid:1e015d36-6dda-4660-a5d5-a7a56769515b	pregnant					uuid:1e015d36-6dda-4660-a5d5-a7a56769515b	na					uuid:1e015d36-6dda-4660-a5d5-a7a56769515b	na_already_convinced					uuid:1e015d36-6dda-4660-a5d5-a7a56769515b	mosquito					uuid:1e015d36-6dda-4660-a5d5-a7a56769515b
uuid:1e10122a-5240-41a5-869a-ac8e7afa77dc	yes	no	1	yes	no	2665	Jrb		male	na	Finish_secondary	home	yes	post	999	35	Yes	30_39	yes	yes	999	no	not_too_far	yes	uuid:1e10122a-5240-41a5-869a-ac8e7afa77dc	pregnant					uuid:1e10122a-5240-41a5-869a-ac8e7afa77dc	na					uuid:1e10122a-5240-41a5-869a-ac8e7afa77dc	na_already_convinced					uuid:1e10122a-5240-41a5-869a-ac8e7afa77dc	clean_water					uuid:1e10122a-5240-41a5-869a-ac8e7afa77dc
uuid:1e47d684-46fd-4bfe-b90d-3511d2adb4a3	dk	dk	3	yes	dk	140	Mm	Hyd	female	dk	Finish_primary	home	no	post	2	27	Yes	18_29	yes	yes	999	no	dk	yes	uuid:1e47d684-46fd-4bfe-b90d-3511d2adb4a3	pregnant					uuid:1e47d684-46fd-4bfe-b90d-3511d2adb4a3	na					uuid:1e47d684-46fd-4bfe-b90d-3511d2adb4a3	help_family					uuid:1e47d684-46fd-4bfe-b90d-3511d2adb4a3	iftreat					uuid:1e47d684-46fd-4bfe-b90d-3511d2adb4a3
uuid:1e4b6dba-8575-49e6-8ef6-c47b13f5e5d7	yes	no	5	yes	yes	282	Mp		female	na	Primary	post	yes	post	3	35	Yes	30_39	yes	yes	999	no	close	yes	uuid:1e4b6dba-8575-49e6-8ef6-c47b13f5e5d7	pregnant					uuid:1e4b6dba-8575-49e6-8ef6-c47b13f5e5d7	na					uuid:1e4b6dba-8575-49e6-8ef6-c47b13f5e5d7	help_me					uuid:1e4b6dba-8575-49e6-8ef6-c47b13f5e5d7	clean_water					uuid:1e4b6dba-8575-49e6-8ef6-c47b13f5e5d7
uuid:1e59ae85-a8dd-4900-a67d-63f291fb07bf	yes	no	1	yes	yes	43	Cg		female	na	Some_secondary	school	yes	post	2	18	Yes	18_29	yes	yes	999	no	close	yes	uuid:1e59ae85-a8dd-4900-a67d-63f291fb07bf	pregnant					uuid:1e59ae85-a8dd-4900-a67d-63f291fb07bf	na					uuid:1e59ae85-a8dd-4900-a67d-63f291fb07bf	na_already_convinced					uuid:1e59ae85-a8dd-4900-a67d-63f291fb07bf	clean_water					uuid:1e59ae85-a8dd-4900-a67d-63f291fb07bf
uuid:1e7ce179-64c1-4796-bd73-331f28c62c5b	yes	no	2	yes	yes	341	av		female	na	Some_secondary	post	yes	post	2	19	Yes	18_29	yes	yes	999	yes	close	yes	uuid:1e7ce179-64c1-4796-bd73-331f28c62c5b	pregnant					uuid:1e7ce179-64c1-4796-bd73-331f28c62c5b	dk					uuid:1e7ce179-64c1-4796-bd73-331f28c62c5b	uk					uuid:1e7ce179-64c1-4796-bd73-331f28c62c5b	unknown					uuid:1e7ce179-64c1-4796-bd73-331f28c62c5b
uuid:1eff2a4a-8ab4-4f53-855f-ba7a0642ad0a	yes	no	1	yes	yes	2811	mj		male	na	Finish_primary	post	no	post	0	18	Yes	18_29	yes	yes	999	yes	close	yes	uuid:1eff2a4a-8ab4-4f53-855f-ba7a0642ad0a	pregnant					uuid:1eff2a4a-8ab4-4f53-855f-ba7a0642ad0a	dk					uuid:1eff2a4a-8ab4-4f53-855f-ba7a0642ad0a	na_already_convinced					uuid:1eff2a4a-8ab4-4f53-855f-ba7a0642ad0a	clean_water					uuid:1eff2a4a-8ab4-4f53-855f-ba7a0642ad0a
uuid:1f287411-4a1f-4a52-b11a-054cd4e181c9	yes	no	3	yes	yes	133	Pcd	Gfh	male	1	Primary	post	yes	post	3	72	Yes	70_79	yes	yes	999	no	close	yes	uuid:1f287411-4a1f-4a52-b11a-054cd4e181c9	pregnant					uuid:1f287411-4a1f-4a52-b11a-054cd4e181c9	na					uuid:1f287411-4a1f-4a52-b11a-054cd4e181c9	help_me					uuid:1f287411-4a1f-4a52-b11a-054cd4e181c9	iftreat					uuid:1f287411-4a1f-4a52-b11a-054cd4e181c9
uuid:1f55d23f-de7a-412d-b822-e59f41b594c7	yes	no	2	yes	yes	94	gc		female	na	No	post	yes	post	3	40	Yes	40_49	yes	yes	999	yes	close	yes	uuid:1f55d23f-de7a-412d-b822-e59f41b594c7	dk					uuid:1f55d23f-de7a-412d-b822-e59f41b594c7	dk					uuid:1f55d23f-de7a-412d-b822-e59f41b594c7	na_already_convinced					uuid:1f55d23f-de7a-412d-b822-e59f41b594c7	unknown					uuid:1f55d23f-de7a-412d-b822-e59f41b594c7
uuid:1f9763cd-781b-48f0-a9ed-5d1f60c51176	yes	no	5	yes	yes	2706	Ac	Ok	female	na	No	post	yes	post	3	49	Yes	40_49	yes	yes	3	yes	not_too_far	yes	uuid:1f9763cd-781b-48f0-a9ed-5d1f60c51176	pregnant					uuid:1f9763cd-781b-48f0-a9ed-5d1f60c51176	dk					uuid:1f9763cd-781b-48f0-a9ed-5d1f60c51176	other					uuid:1f9763cd-781b-48f0-a9ed-5d1f60c51176	clean_water					uuid:1f9763cd-781b-48f0-a9ed-5d1f60c51176
uuid:1f9cb503-0a87-48cc-b043-2d667858be8d	yes	no	2	yes	yes	948	vc		male	na	Some_secondary	post	yes	post	2	22	Yes	18_29	yes	yes	999	yes	not_too_far	yes	uuid:1f9cb503-0a87-48cc-b043-2d667858be8d	pregnant					uuid:1f9cb503-0a87-48cc-b043-2d667858be8d	dk					uuid:1f9cb503-0a87-48cc-b043-2d667858be8d	na_already_convinced					uuid:1f9cb503-0a87-48cc-b043-2d667858be8d	bednets					uuid:1f9cb503-0a87-48cc-b043-2d667858be8d
uuid:1fec7ddd-dd56-43c6-8d6e-b5f93a39dbd9	yes	no	1	yes	no	2634	Sj	Yd	female	na	No	home	yes	post	1	45	Yes	40_49	yes	yes	999	yes	not_too_far	yes	uuid:1fec7ddd-dd56-43c6-8d6e-b5f93a39dbd9	Children_unk					uuid:1fec7ddd-dd56-43c6-8d6e-b5f93a39dbd9	action					uuid:1fec7ddd-dd56-43c6-8d6e-b5f93a39dbd9	na_already_convinced					uuid:1fec7ddd-dd56-43c6-8d6e-b5f93a39dbd9	iftreat					uuid:1fec7ddd-dd56-43c6-8d6e-b5f93a39dbd9
uuid:202965ac-8a22-46d8-984e-2160a63e6bfc	yes	no	2	yes	yes	151	mc		male	na	Some_secondary	post	yes	post	2	24	Yes	18_29	yes	yes	999	no	close	yes	uuid:202965ac-8a22-46d8-984e-2160a63e6bfc	pregnant					uuid:202965ac-8a22-46d8-984e-2160a63e6bfc	na					uuid:202965ac-8a22-46d8-984e-2160a63e6bfc	na_already_convinced					uuid:202965ac-8a22-46d8-984e-2160a63e6bfc	unknown					uuid:202965ac-8a22-46d8-984e-2160a63e6bfc
uuid:205600e1-4654-49f3-86b9-0e802c7f5bfa	yes	no	5	yes	yes	250	Fb		female	na	No	post	yes	post	3	44	Yes	40_49	yes	yes	999	no	not_too_far	yes	uuid:205600e1-4654-49f3-86b9-0e802c7f5bfa	pregnant					uuid:205600e1-4654-49f3-86b9-0e802c7f5bfa	na					uuid:205600e1-4654-49f3-86b9-0e802c7f5bfa	help_me					uuid:205600e1-4654-49f3-86b9-0e802c7f5bfa	bednets					uuid:205600e1-4654-49f3-86b9-0e802c7f5bfa
uuid:205f32f9-01a8-4943-84d5-b7ef838eb2b8	yes	no	5	yes	yes	207	Pj	Dhd	male	1	No	post	yes	post	2	40	Yes	40_49	no	yes	999	yes	close	yes	uuid:205f32f9-01a8-4943-84d5-b7ef838eb2b8	Children_under_1					uuid:205f32f9-01a8-4943-84d5-b7ef838eb2b8	action					uuid:205f32f9-01a8-4943-84d5-b7ef838eb2b8	uk					uuid:205f32f9-01a8-4943-84d5-b7ef838eb2b8	n/a					uuid:205f32f9-01a8-4943-84d5-b7ef838eb2b8
uuid:20a0bb53-ac04-4c61-9ab2-6d8952a5e475	yes	no	4	yes	yes	258	F f		male	na	Primary	post	yes	post	2	36	Yes	30_39	yes	yes	999	no	close	yes	uuid:20a0bb53-ac04-4c61-9ab2-6d8952a5e475	pregnant					uuid:20a0bb53-ac04-4c61-9ab2-6d8952a5e475	na					uuid:20a0bb53-ac04-4c61-9ab2-6d8952a5e475	help_me					uuid:20a0bb53-ac04-4c61-9ab2-6d8952a5e475	unknown					uuid:20a0bb53-ac04-4c61-9ab2-6d8952a5e475
uuid:20a1bef8-286d-4f62-b678-c24df2d8e3ce	yes	no	1	yes	yes	2811	ro		male	na	Some_secondary	post	no	post	0	23	Yes	18_29	yes	yes	999	yes	close	yes	uuid:20a1bef8-286d-4f62-b678-c24df2d8e3ce	pregnant					uuid:20a1bef8-286d-4f62-b678-c24df2d8e3ce	action					uuid:20a1bef8-286d-4f62-b678-c24df2d8e3ce	na_already_convinced					uuid:20a1bef8-286d-4f62-b678-c24df2d8e3ce	clean_water					uuid:20a1bef8-286d-4f62-b678-c24df2d8e3ce
uuid:20a85a33-0a45-4952-a463-98d7e59d6f09	yes	no	2	yes	yes	905	ep		female	na	Primary	post	yes	post	2	25	Yes	18_29	yes	yes	999	no	close	yes	uuid:20a85a33-0a45-4952-a463-98d7e59d6f09	pregnant					uuid:20a85a33-0a45-4952-a463-98d7e59d6f09	na					uuid:20a85a33-0a45-4952-a463-98d7e59d6f09	na_already_convinced					uuid:20a85a33-0a45-4952-a463-98d7e59d6f09	unknown					uuid:20a85a33-0a45-4952-a463-98d7e59d6f09
uuid:20f10238-a6d5-4757-8d1f-9f45e994415e	yes	no	5	yes	yes	1032	Gg		male	na	Finish_primary	post	yes	post	2	32	Yes	30_39	yes	yes	999	no	close	yes	uuid:20f10238-a6d5-4757-8d1f-9f45e994415e	pregnant					uuid:20f10238-a6d5-4757-8d1f-9f45e994415e	na					uuid:20f10238-a6d5-4757-8d1f-9f45e994415e	na_already_convinced					uuid:20f10238-a6d5-4757-8d1f-9f45e994415e	bednets					uuid:20f10238-a6d5-4757-8d1f-9f45e994415e
uuid:2106ba58-2e4e-4a7a-abcc-103b0f4c5f2f	no	no	2	yes	yes	912	df		male	na	Primary	post	yes	post	2	19	Yes	18_29	yes	yes	999	no	close	yes	uuid:2106ba58-2e4e-4a7a-abcc-103b0f4c5f2f	pregnant					uuid:2106ba58-2e4e-4a7a-abcc-103b0f4c5f2f	dk					uuid:2106ba58-2e4e-4a7a-abcc-103b0f4c5f2f	na_already_convinced					uuid:2106ba58-2e4e-4a7a-abcc-103b0f4c5f2f	unknown					uuid:2106ba58-2e4e-4a7a-abcc-103b0f4c5f2f
uuid:210a78cb-d4f2-45f2-a06e-06e7837a4776	yes	no	5	yes	yes	271	Mc		female	na	No	post	yes	post	3	999	Yes	60_69	no	yes	999	no	close	no	uuid:210a78cb-d4f2-45f2-a06e-06e7837a4776	pregnant					uuid:210a78cb-d4f2-45f2-a06e-06e7837a4776	na					uuid:210a78cb-d4f2-45f2-a06e-06e7837a4776	uk					uuid:210a78cb-d4f2-45f2-a06e-06e7837a4776	n/a					uuid:210a78cb-d4f2-45f2-a06e-06e7837a4776
uuid:21296f6f-4143-4bd5-9918-7517cbc6ebf0	na_not_aware_of_post	dk	4	yes	na	167	A r		female	na	No	na	dk	na	999	60	DK	60_69	yes	na	999	na	na_not_aware_post	no	uuid:21296f6f-4143-4bd5-9918-7517cbc6ebf0	dk					uuid:21296f6f-4143-4bd5-9918-7517cbc6ebf0	na					uuid:21296f6f-4143-4bd5-9918-7517cbc6ebf0	uk					uuid:21296f6f-4143-4bd5-9918-7517cbc6ebf0	unknown					uuid:21296f6f-4143-4bd5-9918-7517cbc6ebf0
uuid:212e29fb-56e4-41fe-8090-754dde537a15	dk	dk	2	yes	na	79	ca		female	na	Primary	na	yes	na	2	23	Yes	18_29	yes	na	999	na	dk	no	uuid:212e29fb-56e4-41fe-8090-754dde537a15	pregnant					uuid:212e29fb-56e4-41fe-8090-754dde537a15	na					uuid:212e29fb-56e4-41fe-8090-754dde537a15	uk					uuid:212e29fb-56e4-41fe-8090-754dde537a15	clean_water					uuid:212e29fb-56e4-41fe-8090-754dde537a15
uuid:214f218e-8d15-4795-bd3f-639a1191ce5e	yes	yes	2	yes	yes	2836	zg		female	2	No	post	yes	post	3	46	Yes	40_49	yes	yes	1	yes	close	yes	uuid:214f218e-8d15-4795-bd3f-639a1191ce5e	pregnant					uuid:214f218e-8d15-4795-bd3f-639a1191ce5e	not_eat					uuid:214f218e-8d15-4795-bd3f-639a1191ce5e	na_already_convinced					uuid:214f218e-8d15-4795-bd3f-639a1191ce5e	clean_water					uuid:214f218e-8d15-4795-bd3f-639a1191ce5e
uuid:21518ea4-2350-4593-ba4b-48ad441b5392	yes	no	2	yes	yes	251	mm		female	na	Primary	post	yes	post	2	27	Yes	18_29	yes	yes	999	yes	close	yes	uuid:21518ea4-2350-4593-ba4b-48ad441b5392	dk					uuid:21518ea4-2350-4593-ba4b-48ad441b5392	action					uuid:21518ea4-2350-4593-ba4b-48ad441b5392	uk					uuid:21518ea4-2350-4593-ba4b-48ad441b5392	unknown					uuid:21518ea4-2350-4593-ba4b-48ad441b5392
uuid:2151aecd-f6ca-4f3b-870e-ef4f92bdb14c	dk	dk	2	yes	na	2850	ci		female	na	Some_secondary	na	yes	na	0	22	Yes	18_29	yes	na	999	na	dk	no	uuid:2151aecd-f6ca-4f3b-870e-ef4f92bdb14c	pregnant					uuid:2151aecd-f6ca-4f3b-870e-ef4f92bdb14c	na					uuid:2151aecd-f6ca-4f3b-870e-ef4f92bdb14c	uk					uuid:2151aecd-f6ca-4f3b-870e-ef4f92bdb14c	clean_water					uuid:2151aecd-f6ca-4f3b-870e-ef4f92bdb14c
uuid:2164c446-cf10-488c-8361-44fb986f6da1	yes	no	5	yes	yes	242	Mr		female	na	No	post	yes	post	2	50	Yes	50_59	yes	yes	999	no	close	yes	uuid:2164c446-cf10-488c-8361-44fb986f6da1	pregnant					uuid:2164c446-cf10-488c-8361-44fb986f6da1	na					uuid:2164c446-cf10-488c-8361-44fb986f6da1	help_me					uuid:2164c446-cf10-488c-8361-44fb986f6da1	bednets					uuid:2164c446-cf10-488c-8361-44fb986f6da1
uuid:2205a581-3003-4952-91ae-b54c7eb31168	na_not_aware_of_post	dk	4	yes	na	158	M j		female	na	Primary	na	no	na	999	29	No	18_29	no	na	999	na	na_not_aware_post	no	uuid:2205a581-3003-4952-91ae-b54c7eb31168	pregnant					uuid:2205a581-3003-4952-91ae-b54c7eb31168	na					uuid:2205a581-3003-4952-91ae-b54c7eb31168	help_me					uuid:2205a581-3003-4952-91ae-b54c7eb31168	n/a					uuid:2205a581-3003-4952-91ae-b54c7eb31168
uuid:22ad873a-c7e4-479b-a9b6-3c1d4c0a1896	yes	no	1	yes	yes	2625	dn		male	na	Primary	post	yes	post	2	60	Yes	60_69	yes	yes	999	yes	close	yes	uuid:22ad873a-c7e4-479b-a9b6-3c1d4c0a1896	dk					uuid:22ad873a-c7e4-479b-a9b6-3c1d4c0a1896	action					uuid:22ad873a-c7e4-479b-a9b6-3c1d4c0a1896	na_already_convinced					uuid:22ad873a-c7e4-479b-a9b6-3c1d4c0a1896	iftreat					uuid:22ad873a-c7e4-479b-a9b6-3c1d4c0a1896
uuid:22d12256-b4b5-4f74-8878-9e64a6c4bc63	yes	no	2	yes	yes	71	it		male	na	No	post	yes	post	3	56	Yes	50_59	yes	yes	999	no	not_too_far	yes	uuid:22d12256-b4b5-4f74-8878-9e64a6c4bc63	dk					uuid:22d12256-b4b5-4f74-8878-9e64a6c4bc63	na					uuid:22d12256-b4b5-4f74-8878-9e64a6c4bc63	uk					uuid:22d12256-b4b5-4f74-8878-9e64a6c4bc63	unknown					uuid:22d12256-b4b5-4f74-8878-9e64a6c4bc63
uuid:23358eda-d7f1-4918-8700-aa8f98c2ab97	na_not_aware_of_post	dk	4	yes	na	362	Mf	Li pa pran l	female	na	Primary	na	no	na	0	50	Yes	50_59	yes	na	999	na	na_not_aware_post	no	uuid:23358eda-d7f1-4918-8700-aa8f98c2ab97	pregnant					uuid:23358eda-d7f1-4918-8700-aa8f98c2ab97	na					uuid:23358eda-d7f1-4918-8700-aa8f98c2ab97	uk					uuid:23358eda-d7f1-4918-8700-aa8f98c2ab97	clean_water					uuid:23358eda-d7f1-4918-8700-aa8f98c2ab97
uuid:2381c3ca-99e3-4cab-8ff4-c5afe657d3ce	yes	no	2	yes	yes	151	ji		female	na	No	post	yes	post	3	49	Yes	40_49	yes	yes	999	yes	close	yes	uuid:2381c3ca-99e3-4cab-8ff4-c5afe657d3ce	pregnant					uuid:2381c3ca-99e3-4cab-8ff4-c5afe657d3ce	dk					uuid:2381c3ca-99e3-4cab-8ff4-c5afe657d3ce	na_already_convinced					uuid:2381c3ca-99e3-4cab-8ff4-c5afe657d3ce	unknown					uuid:2381c3ca-99e3-4cab-8ff4-c5afe657d3ce
uuid:239f8097-12c4-42e1-ab5f-69888f3d4a84	yes	no	3	yes	yes	121	Pmd	Hyfd	female	1	No	post	yes	post	3	62	Yes	60_69	yes	yes	999	no	close	yes	uuid:239f8097-12c4-42e1-ab5f-69888f3d4a84	pregnant					uuid:239f8097-12c4-42e1-ab5f-69888f3d4a84	na					uuid:239f8097-12c4-42e1-ab5f-69888f3d4a84	help_me					uuid:239f8097-12c4-42e1-ab5f-69888f3d4a84	bednets					uuid:239f8097-12c4-42e1-ab5f-69888f3d4a84
uuid:23af8739-411c-42b9-bf16-52e086298bbc	yes	no	5	yes	yes	227	Jc		male	na	No	post	yes	post	2	45	Yes	40_49	no	yes	999	no	not_too_far	yes	uuid:23af8739-411c-42b9-bf16-52e086298bbc	pregnant					uuid:23af8739-411c-42b9-bf16-52e086298bbc	na					uuid:23af8739-411c-42b9-bf16-52e086298bbc	side_effect					uuid:23af8739-411c-42b9-bf16-52e086298bbc	n/a					uuid:23af8739-411c-42b9-bf16-52e086298bbc
uuid:23d4f901-d7d9-451c-a437-35abfa635a1b	yes	no	4	yes	yes	335	M l		female	na	No	post	yes	post	1	45	Yes	40_49	yes	yes	999	yes	close	yes	uuid:23d4f901-d7d9-451c-a437-35abfa635a1b	Children_under_1					uuid:23d4f901-d7d9-451c-a437-35abfa635a1b	dk					uuid:23d4f901-d7d9-451c-a437-35abfa635a1b	help_me					uuid:23d4f901-d7d9-451c-a437-35abfa635a1b	mosquito					uuid:23d4f901-d7d9-451c-a437-35abfa635a1b
uuid:23d561f6-fac5-4a37-a793-c77b418c7beb	yes	no	1	dk	yes	2674	iv		female	na	Primary	post	yes	post	1	36	Yes	30_39	yes	yes	999	yes	close	yes	uuid:23d561f6-fac5-4a37-a793-c77b418c7beb	pregnant					uuid:23d561f6-fac5-4a37-a793-c77b418c7beb	dk					uuid:23d561f6-fac5-4a37-a793-c77b418c7beb	side_effect					uuid:23d561f6-fac5-4a37-a793-c77b418c7beb	iftreat					uuid:23d561f6-fac5-4a37-a793-c77b418c7beb
uuid:24391dee-cbc0-43e7-a189-d6664eb999b0	yes	no	3	yes	yes	102	Cj	Hdg	female	1	No	post	yes	post	3	35	Yes	30_39	yes	yes	999	no	far	yes	uuid:24391dee-cbc0-43e7-a189-d6664eb999b0	dk					uuid:24391dee-cbc0-43e7-a189-d6664eb999b0	na					uuid:24391dee-cbc0-43e7-a189-d6664eb999b0	help_me					uuid:24391dee-cbc0-43e7-a189-d6664eb999b0	unknown					uuid:24391dee-cbc0-43e7-a189-d6664eb999b0
uuid:244ec147-e341-45c4-8438-ccb57110a958	na_not_aware_of_post	dk	5	yes	na	225	Nl	Li pat abite nan zone nan apen li vin rete	female	na	Primary	na	no	na	999	27	No	18_29	no	no	999	na	na_not_aware_post	no	uuid:244ec147-e341-45c4-8438-ccb57110a958	dk					uuid:244ec147-e341-45c4-8438-ccb57110a958	na					uuid:244ec147-e341-45c4-8438-ccb57110a958	help_me					uuid:244ec147-e341-45c4-8438-ccb57110a958	n/a					uuid:244ec147-e341-45c4-8438-ccb57110a958
uuid:247302ea-803d-4261-abfa-b3f4679699a2	yes	no	1	yes	yes	287	Mf	Li pat isit ane avan yo	female	na	Some_secondary	post	no	post	0	36	Yes	30_39	yes	yes	999	no	close	yes	uuid:247302ea-803d-4261-abfa-b3f4679699a2	pregnant					uuid:247302ea-803d-4261-abfa-b3f4679699a2	na					uuid:247302ea-803d-4261-abfa-b3f4679699a2	na_already_convinced					uuid:247302ea-803d-4261-abfa-b3f4679699a2	clean_water					uuid:247302ea-803d-4261-abfa-b3f4679699a2
uuid:249f3bcc-efc8-4616-8044-96ecd029d962	yes	no	2	yes	yes	259	aa		female	na	Primary	post	yes	post	2	45	Yes	40_49	yes	yes	999	yes	close	yes	uuid:249f3bcc-efc8-4616-8044-96ecd029d962	dk					uuid:249f3bcc-efc8-4616-8044-96ecd029d962	not_eat					uuid:249f3bcc-efc8-4616-8044-96ecd029d962	na_already_convinced					uuid:249f3bcc-efc8-4616-8044-96ecd029d962	unknown					uuid:249f3bcc-efc8-4616-8044-96ecd029d962
uuid:24cd8a78-a721-4182-a9ef-424dc0b74027	yes	no	1	yes	yes	2625	fn		female	na	Some_secondary	post	yes	post	1	18	Yes	18_29	yes	yes	999	yes	close	yes	uuid:24cd8a78-a721-4182-a9ef-424dc0b74027	pregnant					uuid:24cd8a78-a721-4182-a9ef-424dc0b74027	action					uuid:24cd8a78-a721-4182-a9ef-424dc0b74027	na_already_convinced					uuid:24cd8a78-a721-4182-a9ef-424dc0b74027	clean_water					uuid:24cd8a78-a721-4182-a9ef-424dc0b74027
uuid:250a1926-a83d-4739-bc79-505b6c7a3b8d	yes	no	1	yes	yes	42	Mp		female	na	Some_secondary	post	yes	post	3	18	Yes	18_29	yes	yes	999	no	close	yes	uuid:250a1926-a83d-4739-bc79-505b6c7a3b8d	pregnant					uuid:250a1926-a83d-4739-bc79-505b6c7a3b8d	na					uuid:250a1926-a83d-4739-bc79-505b6c7a3b8d	na_already_convinced					uuid:250a1926-a83d-4739-bc79-505b6c7a3b8d	bednets					uuid:250a1926-a83d-4739-bc79-505b6c7a3b8d
uuid:252ada56-46fa-46e6-ab3c-30984f6934e5	dk	dk	2	yes	na	73	vm		female	na	Primary	na	yes	na	2	37	Yes	30_39	yes	na	999	na	dk	no	uuid:252ada56-46fa-46e6-ab3c-30984f6934e5	pregnant					uuid:252ada56-46fa-46e6-ab3c-30984f6934e5	na					uuid:252ada56-46fa-46e6-ab3c-30984f6934e5	help_me					uuid:252ada56-46fa-46e6-ab3c-30984f6934e5	unknown					uuid:252ada56-46fa-46e6-ab3c-30984f6934e5
uuid:2553fd00-7392-46d1-a781-552581da106e	yes	no	5	yes	yes	271	Dj		female	na	No	post	yes	post	3	32	Yes	30_39	no	yes	999	no	close	yes	uuid:2553fd00-7392-46d1-a781-552581da106e	pregnant					uuid:2553fd00-7392-46d1-a781-552581da106e	na					uuid:2553fd00-7392-46d1-a781-552581da106e	help_me					uuid:2553fd00-7392-46d1-a781-552581da106e	unknown					uuid:2553fd00-7392-46d1-a781-552581da106e
uuid:25ad5cf1-8624-412d-b3b0-74eff048003b	yes	no	1	yes	no	2615	Rp		female	na	Some_secondary	home	no	post	0	31	Yes	30_39	yes	yes	999	no	not_too_far	yes	uuid:25ad5cf1-8624-412d-b3b0-74eff048003b	pregnant					uuid:25ad5cf1-8624-412d-b3b0-74eff048003b	na					uuid:25ad5cf1-8624-412d-b3b0-74eff048003b	na_already_convinced					uuid:25ad5cf1-8624-412d-b3b0-74eff048003b	iftreat					uuid:25ad5cf1-8624-412d-b3b0-74eff048003b
uuid:25f5cce6-b23e-42e1-94dc-66718063ee3b	yes	no	5	yes	yes	288	Hp		female	na	Some_secondary	post	yes	post	3	48	Yes	40_49	yes	yes	999	no	close	yes	uuid:25f5cce6-b23e-42e1-94dc-66718063ee3b	pregnant					uuid:25f5cce6-b23e-42e1-94dc-66718063ee3b	na					uuid:25f5cce6-b23e-42e1-94dc-66718063ee3b	help_me					uuid:25f5cce6-b23e-42e1-94dc-66718063ee3b	clean_water					uuid:25f5cce6-b23e-42e1-94dc-66718063ee3b
uuid:265a27f0-3d33-4335-b315-3b75be2dcc63	yes	no	1	yes	yes	43	Cj		male	na	University	post	yes	post	1	27	Yes	18_29	yes	yes	999	no	close	yes	uuid:265a27f0-3d33-4335-b315-3b75be2dcc63	pregnant					uuid:265a27f0-3d33-4335-b315-3b75be2dcc63	na					uuid:265a27f0-3d33-4335-b315-3b75be2dcc63	na_already_convinced					uuid:265a27f0-3d33-4335-b315-3b75be2dcc63	clean_water					uuid:265a27f0-3d33-4335-b315-3b75be2dcc63
uuid:267e67bc-a6ef-4559-9e63-925b4e51d366	yes	no	1	yes	yes	38	Mj		female	na	No	post	yes	post	1	40	Yes	40_49	yes	yes	999	no	close	yes	uuid:267e67bc-a6ef-4559-9e63-925b4e51d366	dk					uuid:267e67bc-a6ef-4559-9e63-925b4e51d366	na					uuid:267e67bc-a6ef-4559-9e63-925b4e51d366	na_already_convinced					uuid:267e67bc-a6ef-4559-9e63-925b4e51d366	iftreat					uuid:267e67bc-a6ef-4559-9e63-925b4e51d366
uuid:26982671-9f7e-48e2-8053-052d3435a14b	yes	no	1	yes	yes	270	Mp		female	na	No	post	yes	post	3	20	Yes	18_29	yes	yes	999	no	close	yes	uuid:26982671-9f7e-48e2-8053-052d3435a14b	Children_under_1					uuid:26982671-9f7e-48e2-8053-052d3435a14b	na					uuid:26982671-9f7e-48e2-8053-052d3435a14b	na_already_convinced					uuid:26982671-9f7e-48e2-8053-052d3435a14b	other					uuid:26982671-9f7e-48e2-8053-052d3435a14b
uuid:26c02ac1-cd5f-43c3-8448-bcee94843450	yes	no	5	yes	yes	405	ep		male	na	Finish_primary	post	yes	post	3	25	Yes	18_29	yes	yes	999	no	close	yes	uuid:26c02ac1-cd5f-43c3-8448-bcee94843450	pregnant					uuid:26c02ac1-cd5f-43c3-8448-bcee94843450	na					uuid:26c02ac1-cd5f-43c3-8448-bcee94843450	help_me					uuid:26c02ac1-cd5f-43c3-8448-bcee94843450	clean_water					uuid:26c02ac1-cd5f-43c3-8448-bcee94843450
uuid:26e58d70-810a-47dd-b6b5-23a9fc23826d	yes	no	2	yes	yes	257	re		female	na	Primary	post	yes	post	2	32	Yes	30_39	yes	yes	999	yes	close	yes	uuid:26e58d70-810a-47dd-b6b5-23a9fc23826d	pregnant					uuid:26e58d70-810a-47dd-b6b5-23a9fc23826d	dk					uuid:26e58d70-810a-47dd-b6b5-23a9fc23826d	na_already_convinced					uuid:26e58d70-810a-47dd-b6b5-23a9fc23826d	clean_water					uuid:26e58d70-810a-47dd-b6b5-23a9fc23826d
uuid:26f0ff20-6a70-4f1b-a5f7-cb14f2499ca4	na_not_aware_of_post	dk	5	no	na	2719	Wj		female	na	Some_secondary	na	no	na	0	25	Yes	18_29	yes	na	999	na	na_not_aware_post	no	uuid:26f0ff20-6a70-4f1b-a5f7-cb14f2499ca4	pregnant					uuid:26f0ff20-6a70-4f1b-a5f7-cb14f2499ca4	na					uuid:26f0ff20-6a70-4f1b-a5f7-cb14f2499ca4	uk					uuid:26f0ff20-6a70-4f1b-a5f7-cb14f2499ca4	clean_water					uuid:26f0ff20-6a70-4f1b-a5f7-cb14f2499ca4
uuid:26fbfb90-5bf9-41d3-918a-7b8dd389d626	yes	no	5	yes	yes	1016	Ec		female	na	Primary	post	yes	post	3	19	Yes	18_29	yes	yes	999	no	close	yes	uuid:26fbfb90-5bf9-41d3-918a-7b8dd389d626	pregnant					uuid:26fbfb90-5bf9-41d3-918a-7b8dd389d626	na					uuid:26fbfb90-5bf9-41d3-918a-7b8dd389d626	side_effect					uuid:26fbfb90-5bf9-41d3-918a-7b8dd389d626	clean_water					uuid:26fbfb90-5bf9-41d3-918a-7b8dd389d626
uuid:26ffb667-7cee-4d13-a102-e6c1dc3ab70f	yes	no	2	yes	yes	911	jp		male	na	Primary	post	yes	post	2	38	Yes	30_39	yes	yes	999	yes	close	yes	uuid:26ffb667-7cee-4d13-a102-e6c1dc3ab70f	pregnant					uuid:26ffb667-7cee-4d13-a102-e6c1dc3ab70f	action					uuid:26ffb667-7cee-4d13-a102-e6c1dc3ab70f	na_already_convinced					uuid:26ffb667-7cee-4d13-a102-e6c1dc3ab70f	unknown					uuid:26ffb667-7cee-4d13-a102-e6c1dc3ab70f
uuid:27156d2a-69a0-461b-a3db-9f612374edae	yes	no	5	yes	dk	209	Me	Gsfd	female	1	No	home	yes	home	3	57	Yes	50_59	yes	yes	999	no	far	yes	uuid:27156d2a-69a0-461b-a3db-9f612374edae	pregnant					uuid:27156d2a-69a0-461b-a3db-9f612374edae	na					uuid:27156d2a-69a0-461b-a3db-9f612374edae	uk					uuid:27156d2a-69a0-461b-a3db-9f612374edae	n/a					uuid:27156d2a-69a0-461b-a3db-9f612374edae
uuid:27352ad6-514e-41cd-97d9-9c78234959b4	yes	no	4	yes	yes	162	D n		male	na	No	post	yes	post	999	50	Yes	50_59	yes	yes	99	no	close	yes	uuid:27352ad6-514e-41cd-97d9-9c78234959b4	pregnant					uuid:27352ad6-514e-41cd-97d9-9c78234959b4	na					uuid:27352ad6-514e-41cd-97d9-9c78234959b4	uk					uuid:27352ad6-514e-41cd-97d9-9c78234959b4	unknown					uuid:27352ad6-514e-41cd-97d9-9c78234959b4
uuid:275c88de-8180-42c2-adc9-d86582c4798c	yes	no	1	dk	na	2798	je		male	na	Primary	na	no	home	0	52	Yes	50_59	yes	no	999	na	close	yes	uuid:275c88de-8180-42c2-adc9-d86582c4798c	pregnant					uuid:275c88de-8180-42c2-adc9-d86582c4798c	na					uuid:275c88de-8180-42c2-adc9-d86582c4798c	side_effect					uuid:275c88de-8180-42c2-adc9-d86582c4798c	unknown					uuid:275c88de-8180-42c2-adc9-d86582c4798c
uuid:275ca54d-7844-405a-afa8-2888b8a281bf	yes	no	1	yes	yes	37	Ws		male	na	Primary	post	yes	post	1	40	Yes	40_49	yes	yes	999	no	not_too_far	yes	uuid:275ca54d-7844-405a-afa8-2888b8a281bf	pregnant					uuid:275ca54d-7844-405a-afa8-2888b8a281bf	na					uuid:275ca54d-7844-405a-afa8-2888b8a281bf	na_already_convinced					uuid:275ca54d-7844-405a-afa8-2888b8a281bf	clean_water					uuid:275ca54d-7844-405a-afa8-2888b8a281bf
uuid:2761116c-6319-45b0-82c7-ffc413e94d43	yes	no	2	yes	yes	556	mg		female	na	Some_secondary	post	yes	post	2	24	Yes	18_29	yes	yes	999	yes	close	yes	uuid:2761116c-6319-45b0-82c7-ffc413e94d43	pregnant					uuid:2761116c-6319-45b0-82c7-ffc413e94d43	dk					uuid:2761116c-6319-45b0-82c7-ffc413e94d43	na_already_convinced					uuid:2761116c-6319-45b0-82c7-ffc413e94d43	clean_water					uuid:2761116c-6319-45b0-82c7-ffc413e94d43
uuid:283572ac-e0b1-4a29-a731-6eee99a0c579	yes	no	5	yes	no	226	Rz		male	na	Finish_primary	home	yes	home	2	19	Yes	18_29	no	yes	999	no	far	yes	uuid:283572ac-e0b1-4a29-a731-6eee99a0c579	dk					uuid:283572ac-e0b1-4a29-a731-6eee99a0c579	na					uuid:283572ac-e0b1-4a29-a731-6eee99a0c579	na_already_convinced					uuid:283572ac-e0b1-4a29-a731-6eee99a0c579	n/a					uuid:283572ac-e0b1-4a29-a731-6eee99a0c579
uuid:285d88a1-86c9-4977-bfa8-0e2eaf8fac76	yes	no	5	yes	yes	214	Mv		female	na	Primary	post	yes	post	3	32	Yes	30_39	yes	yes	999	no	close	yes	uuid:285d88a1-86c9-4977-bfa8-0e2eaf8fac76	pregnant					uuid:285d88a1-86c9-4977-bfa8-0e2eaf8fac76	na					uuid:285d88a1-86c9-4977-bfa8-0e2eaf8fac76	side_effect					uuid:285d88a1-86c9-4977-bfa8-0e2eaf8fac76	clean_water					uuid:285d88a1-86c9-4977-bfa8-0e2eaf8fac76
uuid:288c8ecb-5742-4e7e-92fb-803a0e322c66	na_not_aware_of_post	no	1	yes	yes	2624	cs	li vini kounya	female	na	Some_secondary	school	yes	school	1	18	Yes	18_29	yes	yes	999	yes	na_not_aware_post	yes	uuid:288c8ecb-5742-4e7e-92fb-803a0e322c66	pregnant					uuid:288c8ecb-5742-4e7e-92fb-803a0e322c66	action					uuid:288c8ecb-5742-4e7e-92fb-803a0e322c66	na_already_convinced					uuid:288c8ecb-5742-4e7e-92fb-803a0e322c66	clean_water					uuid:288c8ecb-5742-4e7e-92fb-803a0e322c66
uuid:28bbb30f-6cf5-4e58-942c-b7a536fce6cc	yes	no	2	yes	yes	2854	mp		male	na	Some_secondary	post	yes	school	1	18	Yes	18_29	yes	yes	999	yes	close	yes	uuid:28bbb30f-6cf5-4e58-942c-b7a536fce6cc	pregnant					uuid:28bbb30f-6cf5-4e58-942c-b7a536fce6cc	dk					uuid:28bbb30f-6cf5-4e58-942c-b7a536fce6cc	na_already_convinced					uuid:28bbb30f-6cf5-4e58-942c-b7a536fce6cc	unknown					uuid:28bbb30f-6cf5-4e58-942c-b7a536fce6cc
uuid:28d29f13-19a8-4e2a-8661-a4f70524d7a2	yes	no	1	yes	yes	2628	fe		female	na	No	post	yes	post	1	999	Yes	40_49	yes	yes	999	no	not_too_far	yes	uuid:28d29f13-19a8-4e2a-8661-a4f70524d7a2	pregnant					uuid:28d29f13-19a8-4e2a-8661-a4f70524d7a2	na					uuid:28d29f13-19a8-4e2a-8661-a4f70524d7a2	na_already_convinced					uuid:28d29f13-19a8-4e2a-8661-a4f70524d7a2	mosquito					uuid:28d29f13-19a8-4e2a-8661-a4f70524d7a2
uuid:28ec2a53-923f-4736-928f-d798bd61e367	yes	no	4	yes	yes	170	W n		male	na	Primary	post	yes	post	2	32	No	30_39	yes	yes	999	no	not_too_far	yes	uuid:28ec2a53-923f-4736-928f-d798bd61e367	pregnant					uuid:28ec2a53-923f-4736-928f-d798bd61e367	na					uuid:28ec2a53-923f-4736-928f-d798bd61e367	help_me					uuid:28ec2a53-923f-4736-928f-d798bd61e367	unknown					uuid:28ec2a53-923f-4736-928f-d798bd61e367
uuid:29126eaa-0e0d-4627-a4a1-52fc9faa0dc5	yes	dk	4	yes	yes	357	Wj	Or	female	na	Primary	post	yes	post	2	27	Yes	18_29	yes	yes	999	yes	close	yes	uuid:29126eaa-0e0d-4627-a4a1-52fc9faa0dc5	pregnant					uuid:29126eaa-0e0d-4627-a4a1-52fc9faa0dc5	dk					uuid:29126eaa-0e0d-4627-a4a1-52fc9faa0dc5	help_me					uuid:29126eaa-0e0d-4627-a4a1-52fc9faa0dc5	clean_water					uuid:29126eaa-0e0d-4627-a4a1-52fc9faa0dc5
uuid:2913ed03-d6eb-47f8-83c7-02ae9fa8ba72	yes	no	2	yes	yes	63	av		male	na	Some_secondary	post	yes	post	2	27	Yes	18_29	yes	yes	999	yes	not_too_far	yes	uuid:2913ed03-d6eb-47f8-83c7-02ae9fa8ba72	pregnant					uuid:2913ed03-d6eb-47f8-83c7-02ae9fa8ba72	not_eat					uuid:2913ed03-d6eb-47f8-83c7-02ae9fa8ba72	uk					uuid:2913ed03-d6eb-47f8-83c7-02ae9fa8ba72	clean_water					uuid:2913ed03-d6eb-47f8-83c7-02ae9fa8ba72
uuid:2944d239-3cea-405c-b641-0631fd4d2982	yes	no	1	yes	yes	31	Vl		male	na	Primary	post	yes	post	2	43	Yes	40_49	yes	yes	999	no	close	yes	uuid:2944d239-3cea-405c-b641-0631fd4d2982	pregnant					uuid:2944d239-3cea-405c-b641-0631fd4d2982	na					uuid:2944d239-3cea-405c-b641-0631fd4d2982	na_already_convinced					uuid:2944d239-3cea-405c-b641-0631fd4d2982	clean_water					uuid:2944d239-3cea-405c-b641-0631fd4d2982
uuid:29650589-370a-49df-b876-ce6ed1f705c7	yes	no	1	yes	yes	23	Fm	Li pè konprime tou ...	female	na	Primary	home	yes	post	1	52	Yes	50_59	yes	yes	999	yes	close	yes	uuid:29650589-370a-49df-b876-ce6ed1f705c7	pregnant					uuid:29650589-370a-49df-b876-ce6ed1f705c7	action					uuid:29650589-370a-49df-b876-ce6ed1f705c7	na_already_convinced					uuid:29650589-370a-49df-b876-ce6ed1f705c7	clean_water					uuid:29650589-370a-49df-b876-ce6ed1f705c7
uuid:296acf55-0ce5-48d8-9fde-fd660c75e607	yes	no	1	yes	yes	7	Kd		male	na	No	post	yes	post	1	80	Yes	80_89	unknown	yes	999	no	close	yes	uuid:296acf55-0ce5-48d8-9fde-fd660c75e607	dk					uuid:296acf55-0ce5-48d8-9fde-fd660c75e607	na					uuid:296acf55-0ce5-48d8-9fde-fd660c75e607	na_already_convinced					uuid:296acf55-0ce5-48d8-9fde-fd660c75e607	n/a					uuid:296acf55-0ce5-48d8-9fde-fd660c75e607
uuid:29d78667-1faf-4eba-8e14-50c34741c7b5	dk	dk	2	yes	na	323	ji		female	na	No	na	yes	post	2	28	Yes	30_39	yes	no	999	na	dk	yes	uuid:29d78667-1faf-4eba-8e14-50c34741c7b5	pregnant					uuid:29d78667-1faf-4eba-8e14-50c34741c7b5	na					uuid:29d78667-1faf-4eba-8e14-50c34741c7b5	uk					uuid:29d78667-1faf-4eba-8e14-50c34741c7b5	clean_water					uuid:29d78667-1faf-4eba-8e14-50c34741c7b5
uuid:29e89208-1d8e-4919-ab34-f1f7b0472e2a	yes	no	2	yes	yes	2756	sg		female	na	No	post	yes	post	2	45	Yes	40_49	yes	yes	999	yes	not_too_far	yes	uuid:29e89208-1d8e-4919-ab34-f1f7b0472e2a	dk					uuid:29e89208-1d8e-4919-ab34-f1f7b0472e2a	dk					uuid:29e89208-1d8e-4919-ab34-f1f7b0472e2a	uk					uuid:29e89208-1d8e-4919-ab34-f1f7b0472e2a	unknown					uuid:29e89208-1d8e-4919-ab34-f1f7b0472e2a
uuid:29ec2126-c121-4ab1-828f-25b54b15d915	dk	dk	3	dk	dk	864	Ir	Hgu	female	dk	No	home	no	home	2	55	Yes	50_59	yes	yes	999	no	dk	yes	uuid:29ec2126-c121-4ab1-828f-25b54b15d915	pregnant					uuid:29ec2126-c121-4ab1-828f-25b54b15d915	na					uuid:29ec2126-c121-4ab1-828f-25b54b15d915	side_effect					uuid:29ec2126-c121-4ab1-828f-25b54b15d915	unknown					uuid:29ec2126-c121-4ab1-828f-25b54b15d915
uuid:2a05e5a5-3a98-4680-8a4f-8542a122c63e	yes	no	3	yes	yes	527	Cs	Vtj	male	1	Finish_primary	post	yes	post	3	43	Yes	40_49	yes	yes	999	no	close	yes	uuid:2a05e5a5-3a98-4680-8a4f-8542a122c63e	pregnant					uuid:2a05e5a5-3a98-4680-8a4f-8542a122c63e	na					uuid:2a05e5a5-3a98-4680-8a4f-8542a122c63e	help_me					uuid:2a05e5a5-3a98-4680-8a4f-8542a122c63e	bednets					uuid:2a05e5a5-3a98-4680-8a4f-8542a122c63e
uuid:2a41e21c-d804-40c5-81bf-6bfb01884ed4	yes	yes	2	yes	yes	2749	cs		female	1	Primary	post	yes	post	2	27	Yes	18_29	yes	yes	999	no	close	yes	uuid:2a41e21c-d804-40c5-81bf-6bfb01884ed4	pregnant					uuid:2a41e21c-d804-40c5-81bf-6bfb01884ed4	na					uuid:2a41e21c-d804-40c5-81bf-6bfb01884ed4	na_already_convinced					uuid:2a41e21c-d804-40c5-81bf-6bfb01884ed4	clean_water					uuid:2a41e21c-d804-40c5-81bf-6bfb01884ed4
uuid:2a505ec2-b27c-47f4-843e-f5b18c810797	yes	no	2	yes	yes	2837	ja		male	na	Primary	post	yes	post	2	42	Yes	40_49	yes	yes	999	no	close	yes	uuid:2a505ec2-b27c-47f4-843e-f5b18c810797	pregnant					uuid:2a505ec2-b27c-47f4-843e-f5b18c810797	na					uuid:2a505ec2-b27c-47f4-843e-f5b18c810797	na_already_convinced					uuid:2a505ec2-b27c-47f4-843e-f5b18c810797	unknown					uuid:2a505ec2-b27c-47f4-843e-f5b18c810797
uuid:2a5600cc-27ae-4b46-9bcc-337a5bb489df	dk	no	2	yes	na	2843	em		female	na	Some_secondary	na	no	na	999	40	Yes	40_49	yes	na	999	na	dk	no	uuid:2a5600cc-27ae-4b46-9bcc-337a5bb489df	pregnant					uuid:2a5600cc-27ae-4b46-9bcc-337a5bb489df	na					uuid:2a5600cc-27ae-4b46-9bcc-337a5bb489df	uk					uuid:2a5600cc-27ae-4b46-9bcc-337a5bb489df	clean_water					uuid:2a5600cc-27ae-4b46-9bcc-337a5bb489df
uuid:2a6e5f6e-e055-4f13-8c98-8c4b6bcf563b	yes	no	1	yes	yes	2628	ag	present kounya	female	na	Some_secondary	post	yes	post	2	18	Yes	18_29	yes	yes	999	no	close	yes	uuid:2a6e5f6e-e055-4f13-8c98-8c4b6bcf563b	Children_under_1					uuid:2a6e5f6e-e055-4f13-8c98-8c4b6bcf563b	na					uuid:2a6e5f6e-e055-4f13-8c98-8c4b6bcf563b	na_already_convinced					uuid:2a6e5f6e-e055-4f13-8c98-8c4b6bcf563b	bednets					uuid:2a6e5f6e-e055-4f13-8c98-8c4b6bcf563b
uuid:2a781e0f-20b6-4372-88e6-178736e3f0ff	yes	no	2	yes	yes	52	dp		male	na	Finish_primary	post	yes	post	999	20	Yes	18_29	yes	yes	999	no	close	yes	uuid:2a781e0f-20b6-4372-88e6-178736e3f0ff	dk					uuid:2a781e0f-20b6-4372-88e6-178736e3f0ff	na					uuid:2a781e0f-20b6-4372-88e6-178736e3f0ff	na_already_convinced					uuid:2a781e0f-20b6-4372-88e6-178736e3f0ff	unknown					uuid:2a781e0f-20b6-4372-88e6-178736e3f0ff
uuid:2ae01cce-15bd-4021-814e-e34bf80059d3	yes	no	5	yes	yes	1017	Sj		female	na	No	post	yes	post	3	54	Yes	50_59	no	yes	999	no	close	yes	uuid:2ae01cce-15bd-4021-814e-e34bf80059d3	pregnant					uuid:2ae01cce-15bd-4021-814e-e34bf80059d3	na					uuid:2ae01cce-15bd-4021-814e-e34bf80059d3	side_effect					uuid:2ae01cce-15bd-4021-814e-e34bf80059d3	n/a					uuid:2ae01cce-15bd-4021-814e-e34bf80059d3
uuid:2ae2c88c-4e35-4c57-b0d1-0066809c50ae	na_not_aware_of_post	dk	4	dk	yes	2728	Af	Er	female	na	No	post	yes	post	2	55	Yes	50_59	yes	yes	999	yes	close	yes	uuid:2ae2c88c-4e35-4c57-b0d1-0066809c50ae	pregnant					uuid:2ae2c88c-4e35-4c57-b0d1-0066809c50ae	action					uuid:2ae2c88c-4e35-4c57-b0d1-0066809c50ae	help_family					uuid:2ae2c88c-4e35-4c57-b0d1-0066809c50ae	clean_water					uuid:2ae2c88c-4e35-4c57-b0d1-0066809c50ae
uuid:2ae3d881-a6f3-4c09-9f3a-d9e9f4cd4263	yes	no	2	yes	yes	159	kj		female	na	Primary	post	yes	post	3	18	Yes	18_29	yes	yes	999	yes	not_too_far	yes	uuid:2ae3d881-a6f3-4c09-9f3a-d9e9f4cd4263	pregnant					uuid:2ae3d881-a6f3-4c09-9f3a-d9e9f4cd4263	not_eat					uuid:2ae3d881-a6f3-4c09-9f3a-d9e9f4cd4263	na_already_convinced					uuid:2ae3d881-a6f3-4c09-9f3a-d9e9f4cd4263	unknown					uuid:2ae3d881-a6f3-4c09-9f3a-d9e9f4cd4263
uuid:2aebf674-fa17-4ee0-aef8-9ce7a11b1607	yes	no	3	yes	yes	110	As	Bdvd	female	1	No	home	yes	post	3	54	Yes	50_59	yes	yes	999	no	close	yes	uuid:2aebf674-fa17-4ee0-aef8-9ce7a11b1607	dk					uuid:2aebf674-fa17-4ee0-aef8-9ce7a11b1607	na					uuid:2aebf674-fa17-4ee0-aef8-9ce7a11b1607	help_family					uuid:2aebf674-fa17-4ee0-aef8-9ce7a11b1607	unknown					uuid:2aebf674-fa17-4ee0-aef8-9ce7a11b1607
uuid:2b2ad7d1-285c-4511-b749-ac827ea2411f	yes	no	2	yes	yes	62	sj		male	na	Some_secondary	post	yes	post	3	36	Yes	30_39	yes	yes	999	yes	close	yes	uuid:2b2ad7d1-285c-4511-b749-ac827ea2411f	pregnant					uuid:2b2ad7d1-285c-4511-b749-ac827ea2411f	dk					uuid:2b2ad7d1-285c-4511-b749-ac827ea2411f	uk					uuid:2b2ad7d1-285c-4511-b749-ac827ea2411f	unknown					uuid:2b2ad7d1-285c-4511-b749-ac827ea2411f
uuid:2b3b27bb-cd1e-42e5-9317-2a8048cad6b3	yes	no	2	yes	yes	84	ma		female	na	No	post	yes	post	2	35	Yes	30_39	yes	yes	999	no	close	yes	uuid:2b3b27bb-cd1e-42e5-9317-2a8048cad6b3	dk					uuid:2b3b27bb-cd1e-42e5-9317-2a8048cad6b3	na					uuid:2b3b27bb-cd1e-42e5-9317-2a8048cad6b3	uk					uuid:2b3b27bb-cd1e-42e5-9317-2a8048cad6b3	unknown					uuid:2b3b27bb-cd1e-42e5-9317-2a8048cad6b3
uuid:2b427ce3-2e33-4c32-bc30-b90c9da36249	yes	no	2	yes	yes	902	sg		female	na	No	post	yes	post	2	70	Yes	70_79	yes	yes	999	yes	close	yes	uuid:2b427ce3-2e33-4c32-bc30-b90c9da36249	pregnant					uuid:2b427ce3-2e33-4c32-bc30-b90c9da36249	action					uuid:2b427ce3-2e33-4c32-bc30-b90c9da36249	na_already_convinced					uuid:2b427ce3-2e33-4c32-bc30-b90c9da36249	unknown					uuid:2b427ce3-2e33-4c32-bc30-b90c9da36249
uuid:2b60c080-286d-4073-98ec-febf5f320031	yes	no	5	yes	yes	166	Ac		female	na	No	home	yes	home	2	50	Yes	50_59	no	yes	999	no	close	yes	uuid:2b60c080-286d-4073-98ec-febf5f320031	pregnant					uuid:2b60c080-286d-4073-98ec-febf5f320031	na					uuid:2b60c080-286d-4073-98ec-febf5f320031	side_effect					uuid:2b60c080-286d-4073-98ec-febf5f320031	n/a					uuid:2b60c080-286d-4073-98ec-febf5f320031
uuid:2b999c0f-fa88-4fe4-9347-6ca5b28cf4c1	yes	no	2	yes	yes	945	as		female	na	Primary	post	yes	post	1	18	Yes	18_29	yes	yes	999	yes	close	yes	uuid:2b999c0f-fa88-4fe4-9347-6ca5b28cf4c1	pregnant					uuid:2b999c0f-fa88-4fe4-9347-6ca5b28cf4c1	dk					uuid:2b999c0f-fa88-4fe4-9347-6ca5b28cf4c1	na_already_convinced					uuid:2b999c0f-fa88-4fe4-9347-6ca5b28cf4c1	unknown					uuid:2b999c0f-fa88-4fe4-9347-6ca5b28cf4c1
uuid:2ba6e097-5373-4f6f-b8f9-d718f5e4bd6f	yes	no	1	yes	na	17	Dm		female	na	Some_secondary	na	yes	na	1	24	Yes	18_29	yes	no	999	na	close	no	uuid:2ba6e097-5373-4f6f-b8f9-d718f5e4bd6f	pregnant					uuid:2ba6e097-5373-4f6f-b8f9-d718f5e4bd6f	na					uuid:2ba6e097-5373-4f6f-b8f9-d718f5e4bd6f	na_already_convinced					uuid:2ba6e097-5373-4f6f-b8f9-d718f5e4bd6f	unknown					uuid:2ba6e097-5373-4f6f-b8f9-d718f5e4bd6f
uuid:2bba8b98-6168-402b-9c4f-51330ebab765	dk	dk	3	other	na	540	Sm	Gb	male	dk	Finish_primary	na	no	na	0	29	Yes	18_29	yes	na	999	na	dk	no	uuid:2bba8b98-6168-402b-9c4f-51330ebab765	pregnant					uuid:2bba8b98-6168-402b-9c4f-51330ebab765	na					uuid:2bba8b98-6168-402b-9c4f-51330ebab765	help_family					uuid:2bba8b98-6168-402b-9c4f-51330ebab765	clean_water					uuid:2bba8b98-6168-402b-9c4f-51330ebab765
uuid:2bc04f68-9a20-40ab-aa03-fc7fc4363fed	yes	no	5	yes	no	243	Am		female	dk	Some_secondary	home	yes	post	1	21	Yes	18_29	yes	yes	999	yes	close	yes	uuid:2bc04f68-9a20-40ab-aa03-fc7fc4363fed	pregnant					uuid:2bc04f68-9a20-40ab-aa03-fc7fc4363fed	dk					uuid:2bc04f68-9a20-40ab-aa03-fc7fc4363fed	help_me					uuid:2bc04f68-9a20-40ab-aa03-fc7fc4363fed	bednets					uuid:2bc04f68-9a20-40ab-aa03-fc7fc4363fed
uuid:2bc3a9f1-d279-4d26-ba5d-cdee498a9822	yes	no	2	yes	yes	97	mc		female	na	No	post	yes	post	3	50	Yes	50_59	yes	yes	999	no	close	yes	uuid:2bc3a9f1-d279-4d26-ba5d-cdee498a9822	pregnant					uuid:2bc3a9f1-d279-4d26-ba5d-cdee498a9822	na					uuid:2bc3a9f1-d279-4d26-ba5d-cdee498a9822	uk					uuid:2bc3a9f1-d279-4d26-ba5d-cdee498a9822	unknown					uuid:2bc3a9f1-d279-4d26-ba5d-cdee498a9822
uuid:2be40aa3-342d-4848-9589-35399fb76b95	na_not_aware_of_post	dk	5	yes	na	284	Mj		female	na	Some_secondary	na	no	na	0	29	Yes	18_29	yes	no	999	na	na_not_aware_post	no	uuid:2be40aa3-342d-4848-9589-35399fb76b95	pregnant					uuid:2be40aa3-342d-4848-9589-35399fb76b95	na					uuid:2be40aa3-342d-4848-9589-35399fb76b95	help_me					uuid:2be40aa3-342d-4848-9589-35399fb76b95	iftreat					uuid:2be40aa3-342d-4848-9589-35399fb76b95
uuid:2be57d55-9287-4053-a00b-9a04438a3f01	yes	no	3	yes	yes	631	Mg	Gtu	male	1	Finish_primary	post	yes	post	3	53	Yes	50_59	yes	yes	999	no	not_too_far	yes	uuid:2be57d55-9287-4053-a00b-9a04438a3f01	dk					uuid:2be57d55-9287-4053-a00b-9a04438a3f01	na					uuid:2be57d55-9287-4053-a00b-9a04438a3f01	help_me					uuid:2be57d55-9287-4053-a00b-9a04438a3f01	unknown					uuid:2be57d55-9287-4053-a00b-9a04438a3f01
uuid:2bf0dd12-1bfa-4594-b7ef-dc34fb6be3c1	yes	no	2	yes	yes	335	pl		male	na	Some_secondary	post	yes	post	3	38	Yes	30_39	yes	yes	1	no	close	yes	uuid:2bf0dd12-1bfa-4594-b7ef-dc34fb6be3c1	pregnant					uuid:2bf0dd12-1bfa-4594-b7ef-dc34fb6be3c1	na					uuid:2bf0dd12-1bfa-4594-b7ef-dc34fb6be3c1	uk					uuid:2bf0dd12-1bfa-4594-b7ef-dc34fb6be3c1	clean_water					uuid:2bf0dd12-1bfa-4594-b7ef-dc34fb6be3c1
uuid:2c0d2263-0c94-4652-b7fe-16cf92230103	yes	yes	2	yes	yes	254	mt		female	2	No	post	yes	post	3	40	Yes	40_49	yes	yes	999	yes	close	yes	uuid:2c0d2263-0c94-4652-b7fe-16cf92230103	dk					uuid:2c0d2263-0c94-4652-b7fe-16cf92230103	dk					uuid:2c0d2263-0c94-4652-b7fe-16cf92230103	uk					uuid:2c0d2263-0c94-4652-b7fe-16cf92230103	unknown					uuid:2c0d2263-0c94-4652-b7fe-16cf92230103
uuid:2c122edc-00c9-4d07-aa54-3193f6a6daa4	dk	dk	3	dk	na	130	Me	Bduf	female	dk	Primary	na	no	na	2	23	Yes	18_29	yes	na	999	na	dk	no	uuid:2c122edc-00c9-4d07-aa54-3193f6a6daa4	pregnant					uuid:2c122edc-00c9-4d07-aa54-3193f6a6daa4	na					uuid:2c122edc-00c9-4d07-aa54-3193f6a6daa4	side_effect					uuid:2c122edc-00c9-4d07-aa54-3193f6a6daa4	unknown					uuid:2c122edc-00c9-4d07-aa54-3193f6a6daa4
uuid:2c2ebc0d-66ff-4c34-8f23-0191afc16f3f	yes	no	1	yes	yes	282	Bt		female	na	No	post	yes	post	1	37	Yes	30_39	yes	yes	999	yes	not_too_far	yes	uuid:2c2ebc0d-66ff-4c34-8f23-0191afc16f3f	pregnant					uuid:2c2ebc0d-66ff-4c34-8f23-0191afc16f3f	not_eat					uuid:2c2ebc0d-66ff-4c34-8f23-0191afc16f3f	na_already_convinced					uuid:2c2ebc0d-66ff-4c34-8f23-0191afc16f3f	unknown					uuid:2c2ebc0d-66ff-4c34-8f23-0191afc16f3f
uuid:2cdaa470-67ad-4c1f-89f4-59821eb6f272	na_not_aware_of_post	dk	5	yes	na	1025	Ab		female	na	No	na	no	na	1	27	Yes	18_29	yes	na	999	na	na_not_aware_post	no	uuid:2cdaa470-67ad-4c1f-89f4-59821eb6f272	pregnant					uuid:2cdaa470-67ad-4c1f-89f4-59821eb6f272	na					uuid:2cdaa470-67ad-4c1f-89f4-59821eb6f272	help_me					uuid:2cdaa470-67ad-4c1f-89f4-59821eb6f272	clean_water					uuid:2cdaa470-67ad-4c1f-89f4-59821eb6f272
uuid:2d16f3aa-0ecd-4ad0-8362-e2531a24bd64	yes	no	5	yes	yes	210	Rc	Dgs	female	1	Primary	school	yes	school	3	35	No	30_39	yes	yes	999	no	not_too_far	yes	uuid:2d16f3aa-0ecd-4ad0-8362-e2531a24bd64	pregnant					uuid:2d16f3aa-0ecd-4ad0-8362-e2531a24bd64	na					uuid:2d16f3aa-0ecd-4ad0-8362-e2531a24bd64	na_already_convinced					uuid:2d16f3aa-0ecd-4ad0-8362-e2531a24bd64	clean_water					uuid:2d16f3aa-0ecd-4ad0-8362-e2531a24bd64
uuid:2d2807ad-7bba-4637-95a5-ab7d7a0418af	yes	no	2	yes	yes	447	jt		male	na	Some_secondary	post	yes	post	3	26	Yes	18_29	yes	yes	999	yes	close	yes	uuid:2d2807ad-7bba-4637-95a5-ab7d7a0418af	dk					uuid:2d2807ad-7bba-4637-95a5-ab7d7a0418af	dk					uuid:2d2807ad-7bba-4637-95a5-ab7d7a0418af	na_already_convinced					uuid:2d2807ad-7bba-4637-95a5-ab7d7a0418af	unknown					uuid:2d2807ad-7bba-4637-95a5-ab7d7a0418af
uuid:2d3b3486-b9a0-4f2c-8f6c-78607cdcc0d2	dk	dk	2	yes	na	301	sn		female	na	Primary	na	yes	na	1	37	Yes	30_39	yes	na	999	na	dk	no	uuid:2d3b3486-b9a0-4f2c-8f6c-78607cdcc0d2	pregnant					uuid:2d3b3486-b9a0-4f2c-8f6c-78607cdcc0d2	na					uuid:2d3b3486-b9a0-4f2c-8f6c-78607cdcc0d2	uk					uuid:2d3b3486-b9a0-4f2c-8f6c-78607cdcc0d2	unknown					uuid:2d3b3486-b9a0-4f2c-8f6c-78607cdcc0d2
uuid:2d7fb0c5-8d06-4dc1-a6c7-4d7be7d67fa0	no	no	2	yes	yes	912	aa		female	na	No	post	yes	post	2	35	Yes	30_39	yes	yes	999	yes	close	yes	uuid:2d7fb0c5-8d06-4dc1-a6c7-4d7be7d67fa0	pregnant					uuid:2d7fb0c5-8d06-4dc1-a6c7-4d7be7d67fa0	dk					uuid:2d7fb0c5-8d06-4dc1-a6c7-4d7be7d67fa0	na_already_convinced					uuid:2d7fb0c5-8d06-4dc1-a6c7-4d7be7d67fa0	unknown					uuid:2d7fb0c5-8d06-4dc1-a6c7-4d7be7d67fa0
uuid:2d9a35da-a02f-41bd-8f22-0fa85626fe7a	no	dk	4	yes	yes	2568	Mls	Gg	female	na	No	post	yes	post	2	54	Yes	50_59	yes	yes	5	no	close	yes	uuid:2d9a35da-a02f-41bd-8f22-0fa85626fe7a	pregnant					uuid:2d9a35da-a02f-41bd-8f22-0fa85626fe7a	na					uuid:2d9a35da-a02f-41bd-8f22-0fa85626fe7a	help_me					uuid:2d9a35da-a02f-41bd-8f22-0fa85626fe7a	clean_water					uuid:2d9a35da-a02f-41bd-8f22-0fa85626fe7a
uuid:2da65a49-b41f-49af-9648-9ad305228177	yes	no	5	yes	yes	255	Sg		male	na	Some_secondary	post	yes	post	3	29	Yes	18_29	yes	yes	999	no	close	yes	uuid:2da65a49-b41f-49af-9648-9ad305228177	pregnant					uuid:2da65a49-b41f-49af-9648-9ad305228177	na					uuid:2da65a49-b41f-49af-9648-9ad305228177	help_me					uuid:2da65a49-b41f-49af-9648-9ad305228177	bednets					uuid:2da65a49-b41f-49af-9648-9ad305228177
uuid:2df933c1-d183-4146-a522-d82489e206a7	yes	no	4	yes	yes	171	S b		male	na	No	post	no	post	999	40	Yes	40_49	yes	yes	999	yes	close	yes	uuid:2df933c1-d183-4146-a522-d82489e206a7	Children_under_1					uuid:2df933c1-d183-4146-a522-d82489e206a7	action					uuid:2df933c1-d183-4146-a522-d82489e206a7	uk					uuid:2df933c1-d183-4146-a522-d82489e206a7	unknown					uuid:2df933c1-d183-4146-a522-d82489e206a7
uuid:2e557940-24f6-4883-a178-35053e155913	yes	no	1	yes	yes	2611	Mj		female	na	No	post	no	post	0	50	Yes	50_59	yes	yes	999	yes	close	yes	uuid:2e557940-24f6-4883-a178-35053e155913	dk					uuid:2e557940-24f6-4883-a178-35053e155913	dk					uuid:2e557940-24f6-4883-a178-35053e155913	na_already_convinced					uuid:2e557940-24f6-4883-a178-35053e155913	iftreat					uuid:2e557940-24f6-4883-a178-35053e155913
uuid:2e7bf3e3-49fc-4950-b015-c27b5342d1e4	other	no	2	yes	no	2787	Bj		male	na	Some_secondary	school	yes	school	2	18	Yes	18_29	yes	yes	999	no	other	yes	uuid:2e7bf3e3-49fc-4950-b015-c27b5342d1e4	pregnant					uuid:2e7bf3e3-49fc-4950-b015-c27b5342d1e4	na					uuid:2e7bf3e3-49fc-4950-b015-c27b5342d1e4	help_me					uuid:2e7bf3e3-49fc-4950-b015-c27b5342d1e4	clean_water					uuid:2e7bf3e3-49fc-4950-b015-c27b5342d1e4
uuid:2e9c7c5a-c7fd-4224-b904-32ecd70afb02	yes	no	5	yes	yes	216	Fj		male	na	Primary	post	yes	post	2	56	Yes	50_59	no	yes	999	no	close	yes	uuid:2e9c7c5a-c7fd-4224-b904-32ecd70afb02	dk					uuid:2e9c7c5a-c7fd-4224-b904-32ecd70afb02	na					uuid:2e9c7c5a-c7fd-4224-b904-32ecd70afb02	side_effect					uuid:2e9c7c5a-c7fd-4224-b904-32ecd70afb02	n/a					uuid:2e9c7c5a-c7fd-4224-b904-32ecd70afb02
uuid:2ee0f7e1-7011-451a-becb-ddf3efbd0da0	yes	no	5	yes	yes	253	Mt		female	na	No	post	yes	post	3	96	Yes	90_99	yes	yes	999	no	close	yes	uuid:2ee0f7e1-7011-451a-becb-ddf3efbd0da0	dk					uuid:2ee0f7e1-7011-451a-becb-ddf3efbd0da0	na					uuid:2ee0f7e1-7011-451a-becb-ddf3efbd0da0	help_me					uuid:2ee0f7e1-7011-451a-becb-ddf3efbd0da0	unknown					uuid:2ee0f7e1-7011-451a-becb-ddf3efbd0da0
uuid:2ef80576-59f5-4bed-a6e1-ba5ed792f515	yes	no	5	yes	yes	212	Sf	Lot moun yo al nan bouk	female	1	No	school	yes	school	2	999	Yes	60_69	yes	yes	999	no	not_too_far	yes	uuid:2ef80576-59f5-4bed-a6e1-ba5ed792f515	Children_under_1					uuid:2ef80576-59f5-4bed-a6e1-ba5ed792f515	na					uuid:2ef80576-59f5-4bed-a6e1-ba5ed792f515	uk					uuid:2ef80576-59f5-4bed-a6e1-ba5ed792f515	n/a					uuid:2ef80576-59f5-4bed-a6e1-ba5ed792f515
uuid:2f602577-a84a-4027-bd10-7de8cf87f0c7	yes	no	1	yes	yes	2624	tm		female	na	Primary	post	yes	post	1	23	Yes	18_29	yes	yes	999	yes	not_too_far	yes	uuid:2f602577-a84a-4027-bd10-7de8cf87f0c7	pregnant					uuid:2f602577-a84a-4027-bd10-7de8cf87f0c7	dk					uuid:2f602577-a84a-4027-bd10-7de8cf87f0c7	na_already_convinced					uuid:2f602577-a84a-4027-bd10-7de8cf87f0c7	iftreat					uuid:2f602577-a84a-4027-bd10-7de8cf87f0c7
uuid:2f7f96e6-92d2-4e5d-9e3d-635fe1c1a9e6	yes	no	1	yes	yes	269	Jj		female	na	No	post	yes	post	2	58	Yes	50_59	yes	yes	999	no	close	yes	uuid:2f7f96e6-92d2-4e5d-9e3d-635fe1c1a9e6	dk					uuid:2f7f96e6-92d2-4e5d-9e3d-635fe1c1a9e6	na					uuid:2f7f96e6-92d2-4e5d-9e3d-635fe1c1a9e6	na_already_convinced					uuid:2f7f96e6-92d2-4e5d-9e3d-635fe1c1a9e6	clean_water					uuid:2f7f96e6-92d2-4e5d-9e3d-635fe1c1a9e6
uuid:2f832d6f-78f1-4464-bf55-fe9780c21c28	dk	dk	4	yes	na	173	A b		female	na	Primary	na	no	na	999	46	Yes	40_49	yes	na	999	na	dk	no	uuid:2f832d6f-78f1-4464-bf55-fe9780c21c28	Children_under_1					uuid:2f832d6f-78f1-4464-bf55-fe9780c21c28	na					uuid:2f832d6f-78f1-4464-bf55-fe9780c21c28	help_me					uuid:2f832d6f-78f1-4464-bf55-fe9780c21c28	bednets					uuid:2f832d6f-78f1-4464-bf55-fe9780c21c28
uuid:2f90a988-3522-405d-be67-6bbdeb6f0a77	na_not_aware_of_post	dk	5	yes	na	1007	Sa		female	na	Finish_primary	na	no	na	0	26	Yes	18_29	no	na	999	na	na_not_aware_post	no	uuid:2f90a988-3522-405d-be67-6bbdeb6f0a77	pregnant					uuid:2f90a988-3522-405d-be67-6bbdeb6f0a77	na					uuid:2f90a988-3522-405d-be67-6bbdeb6f0a77	help_me					uuid:2f90a988-3522-405d-be67-6bbdeb6f0a77	n/a					uuid:2f90a988-3522-405d-be67-6bbdeb6f0a77
uuid:2fa80997-9c0d-48fb-93ba-4e7d386fceb9	yes	no	1	yes	yes	587	Ee		male	na	Some_secondary	post	yes	post	1	25	Yes	18_29	yes	yes	999	yes	close	yes	uuid:2fa80997-9c0d-48fb-93ba-4e7d386fceb9	dk					uuid:2fa80997-9c0d-48fb-93ba-4e7d386fceb9	dk					uuid:2fa80997-9c0d-48fb-93ba-4e7d386fceb9	na_already_convinced					uuid:2fa80997-9c0d-48fb-93ba-4e7d386fceb9	iftreat					uuid:2fa80997-9c0d-48fb-93ba-4e7d386fceb9
uuid:2faf3489-337c-47a5-9207-ea9687adff59	yes	no	4	yes	yes	174	G e		female	na	No	post	no	post	999	35	Yes	30_39	yes	yes	999	yes	close	yes	uuid:2faf3489-337c-47a5-9207-ea9687adff59	pregnant					uuid:2faf3489-337c-47a5-9207-ea9687adff59	dk					uuid:2faf3489-337c-47a5-9207-ea9687adff59	help_me					uuid:2faf3489-337c-47a5-9207-ea9687adff59	bednets					uuid:2faf3489-337c-47a5-9207-ea9687adff59
uuid:2fcfd892-0f51-4107-8ea9-bec0a577f3da	na_not_aware_of_post	dk	3	dk	na	148	En	Bfh	female	na	No	other	yes	post	3	21	DK	18_29	yes	yes	99	no	dk	unknown	uuid:2fcfd892-0f51-4107-8ea9-bec0a577f3da	dk					uuid:2fcfd892-0f51-4107-8ea9-bec0a577f3da	na					uuid:2fcfd892-0f51-4107-8ea9-bec0a577f3da	side_effect					uuid:2fcfd892-0f51-4107-8ea9-bec0a577f3da	unknown					uuid:2fcfd892-0f51-4107-8ea9-bec0a577f3da
uuid:2fece5dd-9674-4dc2-8993-5602447ff97f	yes	yes	4	yes	yes	2507	B.c	Rfw	male	na	Some_secondary	post	yes	post	2	37	Yes	30_39	yes	yes	999	no	not_too_far	yes	uuid:2fece5dd-9674-4dc2-8993-5602447ff97f	pregnant					uuid:2fece5dd-9674-4dc2-8993-5602447ff97f	na					uuid:2fece5dd-9674-4dc2-8993-5602447ff97f	na_already_convinced					uuid:2fece5dd-9674-4dc2-8993-5602447ff97f	clean_water					uuid:2fece5dd-9674-4dc2-8993-5602447ff97f
uuid:3008336b-de02-4586-9b4b-addf9a2844a2	yes	no	1	yes	yes	40	Mm		female	na	Some_secondary	post	yes	post	2	26	Yes	18_29	yes	yes	999	no	close	yes	uuid:3008336b-de02-4586-9b4b-addf9a2844a2	pregnant					uuid:3008336b-de02-4586-9b4b-addf9a2844a2	na					uuid:3008336b-de02-4586-9b4b-addf9a2844a2	na_already_convinced					uuid:3008336b-de02-4586-9b4b-addf9a2844a2	iftreat					uuid:3008336b-de02-4586-9b4b-addf9a2844a2
uuid:302041d3-ef56-4073-b987-789a3eeeea74	yes	no	4	yes	yes	164	K f		female	na	Some_secondary	post	yes	school	1	23	Yes	18_29	yes	yes	999	no	not_too_far	yes	uuid:302041d3-ef56-4073-b987-789a3eeeea74	pregnant					uuid:302041d3-ef56-4073-b987-789a3eeeea74	na					uuid:302041d3-ef56-4073-b987-789a3eeeea74	help_me					uuid:302041d3-ef56-4073-b987-789a3eeeea74	bednets					uuid:302041d3-ef56-4073-b987-789a3eeeea74
uuid:303e461f-d7df-48ac-ba67-7c611cbe4ba5	dk	dk	3	yes	dk	858	Yi	Gef	female	dk	Primary	home	no	home	2	35	Yes	30_39	yes	yes	999	no	dk	yes	uuid:303e461f-d7df-48ac-ba67-7c611cbe4ba5	pregnant					uuid:303e461f-d7df-48ac-ba67-7c611cbe4ba5	na					uuid:303e461f-d7df-48ac-ba67-7c611cbe4ba5	help_family					uuid:303e461f-d7df-48ac-ba67-7c611cbe4ba5	iftreat					uuid:303e461f-d7df-48ac-ba67-7c611cbe4ba5
uuid:305d9718-ec7b-4617-bf7e-dcf4a6a87077	yes	no	2	yes	yes	99	ms		female	na	No	post	yes	post	2	45	Yes	40_49	yes	yes	999	no	close	yes	uuid:305d9718-ec7b-4617-bf7e-dcf4a6a87077	pregnant					uuid:305d9718-ec7b-4617-bf7e-dcf4a6a87077	na					uuid:305d9718-ec7b-4617-bf7e-dcf4a6a87077	uk					uuid:305d9718-ec7b-4617-bf7e-dcf4a6a87077	bednets					uuid:305d9718-ec7b-4617-bf7e-dcf4a6a87077
uuid:307ecc84-9bcd-4239-8435-84008f06016e	yes	no	5	yes	yes	1014	Jl		male	na	Primary	post	yes	school	1	26	Yes	18_29	no	yes	999	no	close	yes	uuid:307ecc84-9bcd-4239-8435-84008f06016e	pregnant					uuid:307ecc84-9bcd-4239-8435-84008f06016e	na					uuid:307ecc84-9bcd-4239-8435-84008f06016e	na_already_convinced					uuid:307ecc84-9bcd-4239-8435-84008f06016e	n/a					uuid:307ecc84-9bcd-4239-8435-84008f06016e
uuid:307eefcb-2d0c-4dc4-9a23-a5d553126791	yes	no	1	yes	yes	593	Ra		female	na	Finish_primary	school	yes	school	1	18	Yes	18_29	yes	yes	999	yes	close	yes	uuid:307eefcb-2d0c-4dc4-9a23-a5d553126791	pregnant					uuid:307eefcb-2d0c-4dc4-9a23-a5d553126791	not_eat					uuid:307eefcb-2d0c-4dc4-9a23-a5d553126791	na_already_convinced					uuid:307eefcb-2d0c-4dc4-9a23-a5d553126791	iftreat					uuid:307eefcb-2d0c-4dc4-9a23-a5d553126791
uuid:308cbc4e-228a-4ef7-8d83-dd2d36f8c52b	yes	no	1	yes	yes	16	Gs		male	na	University	post	yes	post	1	30	Yes	30_39	yes	yes	999	no	not_too_far	yes	uuid:308cbc4e-228a-4ef7-8d83-dd2d36f8c52b	pregnant					uuid:308cbc4e-228a-4ef7-8d83-dd2d36f8c52b	na					uuid:308cbc4e-228a-4ef7-8d83-dd2d36f8c52b	na_already_convinced					uuid:308cbc4e-228a-4ef7-8d83-dd2d36f8c52b	iftreat					uuid:308cbc4e-228a-4ef7-8d83-dd2d36f8c52b
uuid:30955875-cbc0-4c93-b3a9-c71a9b5f8e04	yes	no	5	yes	yes	2676	Ca		female	na	Primary	post	yes	post	2	40	Yes	40_49	yes	yes	999	no	close	yes	uuid:30955875-cbc0-4c93-b3a9-c71a9b5f8e04	pregnant					uuid:30955875-cbc0-4c93-b3a9-c71a9b5f8e04	na					uuid:30955875-cbc0-4c93-b3a9-c71a9b5f8e04	na_already_convinced					uuid:30955875-cbc0-4c93-b3a9-c71a9b5f8e04	clean_water					uuid:30955875-cbc0-4c93-b3a9-c71a9b5f8e04
uuid:3097ffeb-d05a-43de-b76e-e7eb91fc1821	yes	no	2	yes	yes	262	mm		female	na	Primary	post	yes	post	1	38	Yes	30_39	yes	yes	999	yes	close	yes	uuid:3097ffeb-d05a-43de-b76e-e7eb91fc1821	pregnant					uuid:3097ffeb-d05a-43de-b76e-e7eb91fc1821	dk					uuid:3097ffeb-d05a-43de-b76e-e7eb91fc1821	na_already_convinced					uuid:3097ffeb-d05a-43de-b76e-e7eb91fc1821	unknown					uuid:3097ffeb-d05a-43de-b76e-e7eb91fc1821
uuid:30ecc5a2-87fd-4ae6-9452-7a79e8a4d30f	yes	no	2	yes	yes	2781	tv		male	na	Primary	post	yes	post	2	33	Yes	30_39	yes	yes	999	yes	close	yes	uuid:30ecc5a2-87fd-4ae6-9452-7a79e8a4d30f	pregnant					uuid:30ecc5a2-87fd-4ae6-9452-7a79e8a4d30f	dk					uuid:30ecc5a2-87fd-4ae6-9452-7a79e8a4d30f	na_already_convinced					uuid:30ecc5a2-87fd-4ae6-9452-7a79e8a4d30f	unknown					uuid:30ecc5a2-87fd-4ae6-9452-7a79e8a4d30f
uuid:30f685f0-3e4a-4e14-babc-1c6ff3692385	yes	no	1	yes	yes	2804	da	kounya li raplel te bwel	male	na	No	post	no	post	0	50	Yes	50_59	yes	yes	999	yes	not_too_far	yes	uuid:30f685f0-3e4a-4e14-babc-1c6ff3692385	dk					uuid:30f685f0-3e4a-4e14-babc-1c6ff3692385	not_eat					uuid:30f685f0-3e4a-4e14-babc-1c6ff3692385	na_already_convinced					uuid:30f685f0-3e4a-4e14-babc-1c6ff3692385	iftreat					uuid:30f685f0-3e4a-4e14-babc-1c6ff3692385
uuid:3100c3bc-f41e-4da6-8696-39ce7eb299e7	yes	no	2	yes	yes	956	jm		female	na	Primary	post	yes	post	2	41	Yes	40_49	yes	yes	999	yes	close	yes	uuid:3100c3bc-f41e-4da6-8696-39ce7eb299e7	pregnant					uuid:3100c3bc-f41e-4da6-8696-39ce7eb299e7	na					uuid:3100c3bc-f41e-4da6-8696-39ce7eb299e7	na_already_convinced					uuid:3100c3bc-f41e-4da6-8696-39ce7eb299e7	unknown					uuid:3100c3bc-f41e-4da6-8696-39ce7eb299e7
uuid:3109218b-1ae6-4204-ae9e-ee7317307279	dk	dk	4	yes	na	159	F l		male	na	Primary	na	no	na	999	28	Yes	18_29	yes	na	999	na	dk	no	uuid:3109218b-1ae6-4204-ae9e-ee7317307279	dk					uuid:3109218b-1ae6-4204-ae9e-ee7317307279	na					uuid:3109218b-1ae6-4204-ae9e-ee7317307279	help_me					uuid:3109218b-1ae6-4204-ae9e-ee7317307279	unknown					uuid:3109218b-1ae6-4204-ae9e-ee7317307279
uuid:312b2161-210e-4dc0-a7a7-06dda7dfa79e	yes	no	1	yes	yes	36	Wa		male	na	No	post	yes	post	2	45	No	40_49	yes	yes	999	no	not_too_far	yes	uuid:312b2161-210e-4dc0-a7a7-06dda7dfa79e	dk					uuid:312b2161-210e-4dc0-a7a7-06dda7dfa79e	na					uuid:312b2161-210e-4dc0-a7a7-06dda7dfa79e	na_already_convinced					uuid:312b2161-210e-4dc0-a7a7-06dda7dfa79e	clean_water					uuid:312b2161-210e-4dc0-a7a7-06dda7dfa79e
uuid:3141a056-acb3-499b-8915-df43264123c0	yes	no	4	yes	yes	153	J c		male	na	Primary	post	yes	post	99	21	Yes	18_29	yes	yes	999	yes	close	yes	uuid:3141a056-acb3-499b-8915-df43264123c0	Children_under_1					uuid:3141a056-acb3-499b-8915-df43264123c0	dk					uuid:3141a056-acb3-499b-8915-df43264123c0	help_me					uuid:3141a056-acb3-499b-8915-df43264123c0	unknown					uuid:3141a056-acb3-499b-8915-df43264123c0
uuid:318b935b-d68e-4c6f-8db6-29fcab54ca4c	yes	no	5	yes	yes	247	Va		female	na	Some_secondary	post	yes	post	3	38	Yes	30_39	yes	yes	999	no	close	yes	uuid:318b935b-d68e-4c6f-8db6-29fcab54ca4c	pregnant					uuid:318b935b-d68e-4c6f-8db6-29fcab54ca4c	na					uuid:318b935b-d68e-4c6f-8db6-29fcab54ca4c	help_me					uuid:318b935b-d68e-4c6f-8db6-29fcab54ca4c	iftreat					uuid:318b935b-d68e-4c6f-8db6-29fcab54ca4c
uuid:31b5274c-cc24-405e-8a32-e69011c4f44b	yes	no	1	yes	yes	2672	rd		male	na	Some_secondary	post	yes	post	1	18	Yes	18_29	yes	yes	999	yes	not_too_far	yes	uuid:31b5274c-cc24-405e-8a32-e69011c4f44b	pregnant					uuid:31b5274c-cc24-405e-8a32-e69011c4f44b	dk					uuid:31b5274c-cc24-405e-8a32-e69011c4f44b	na_already_convinced					uuid:31b5274c-cc24-405e-8a32-e69011c4f44b	bednets					uuid:31b5274c-cc24-405e-8a32-e69011c4f44b
uuid:31b85478-e682-4021-bd40-cb3b0ecd107f	yes	no	2	yes	yes	338	yv		female	na	Primary	post	yes	post	4	25	Yes	18_29	yes	yes	999	yes	close	yes	uuid:31b85478-e682-4021-bd40-cb3b0ecd107f	pregnant					uuid:31b85478-e682-4021-bd40-cb3b0ecd107f	dk					uuid:31b85478-e682-4021-bd40-cb3b0ecd107f	help_me					uuid:31b85478-e682-4021-bd40-cb3b0ecd107f	clean_water					uuid:31b85478-e682-4021-bd40-cb3b0ecd107f
uuid:32120284-45c0-4bdc-8fee-b2b1c4bf4958	yes	no	2	yes	yes	68	ao		male	na	Some_secondary	post	yes	post	2	33	Yes	30_39	yes	yes	999	no	close	yes	uuid:32120284-45c0-4bdc-8fee-b2b1c4bf4958	pregnant					uuid:32120284-45c0-4bdc-8fee-b2b1c4bf4958	na					uuid:32120284-45c0-4bdc-8fee-b2b1c4bf4958	uk					uuid:32120284-45c0-4bdc-8fee-b2b1c4bf4958	clean_water					uuid:32120284-45c0-4bdc-8fee-b2b1c4bf4958
uuid:3223f7d2-3c95-47f5-897d-66ee7a6ccbe2	yes	no	5	yes	yes	2673	Al		male	na	Some_secondary	school	yes	school	2	19	Yes	18_29	yes	yes	999	no	close	yes	uuid:3223f7d2-3c95-47f5-897d-66ee7a6ccbe2	pregnant					uuid:3223f7d2-3c95-47f5-897d-66ee7a6ccbe2	na					uuid:3223f7d2-3c95-47f5-897d-66ee7a6ccbe2	na_already_convinced					uuid:3223f7d2-3c95-47f5-897d-66ee7a6ccbe2	iftreat					uuid:3223f7d2-3c95-47f5-897d-66ee7a6ccbe2
uuid:323099f5-ba22-449d-9566-6d9fc219fe2e	yes	no	1	yes	yes	2617	pc		male	na	No	post	yes	post	1	47	Yes	40_49	yes	yes	999	no	close	yes	uuid:323099f5-ba22-449d-9566-6d9fc219fe2e	dk					uuid:323099f5-ba22-449d-9566-6d9fc219fe2e	na					uuid:323099f5-ba22-449d-9566-6d9fc219fe2e	na_already_convinced					uuid:323099f5-ba22-449d-9566-6d9fc219fe2e	iftreat					uuid:323099f5-ba22-449d-9566-6d9fc219fe2e
uuid:3244aa90-f086-4a75-a64d-d79c92168fbd	yes	no	5	yes	yes	1026	Sm		female	na	No	post	yes	post	2	49	Yes	40_49	yes	yes	999	no	close	yes	uuid:3244aa90-f086-4a75-a64d-d79c92168fbd	pregnant					uuid:3244aa90-f086-4a75-a64d-d79c92168fbd	na					uuid:3244aa90-f086-4a75-a64d-d79c92168fbd	help_me					uuid:3244aa90-f086-4a75-a64d-d79c92168fbd	clean_water					uuid:3244aa90-f086-4a75-a64d-d79c92168fbd
uuid:3279b3cf-2036-4301-be9f-2cb970b5a3b2	na_not_aware_of_post	dk	5	dk	na	307	Aj	Li y bwe se pitit li ki pale pou li paske li soud.	female	na	No	na	yes	na	2	101	No	100+	no	na	999	na	na_not_aware_post	unknown	uuid:3279b3cf-2036-4301-be9f-2cb970b5a3b2	dk					uuid:3279b3cf-2036-4301-be9f-2cb970b5a3b2	na					uuid:3279b3cf-2036-4301-be9f-2cb970b5a3b2	uk					uuid:3279b3cf-2036-4301-be9f-2cb970b5a3b2	n/a					uuid:3279b3cf-2036-4301-be9f-2cb970b5a3b2
uuid:329c91bb-34a9-4ac3-bb3c-d8e2d034bb48	yes	no	2	yes	yes	89	ja		male	na	Primary	post	yes	post	3	65	Yes	60_69	yes	yes	999	yes	close	yes	uuid:329c91bb-34a9-4ac3-bb3c-d8e2d034bb48	dk					uuid:329c91bb-34a9-4ac3-bb3c-d8e2d034bb48	action					uuid:329c91bb-34a9-4ac3-bb3c-d8e2d034bb48	na_already_convinced					uuid:329c91bb-34a9-4ac3-bb3c-d8e2d034bb48	unknown					uuid:329c91bb-34a9-4ac3-bb3c-d8e2d034bb48
uuid:32b925bf-2861-402d-9d6d-7cc2b8b3f9f0	yes	no	4	yes	yes	253	C f		female	na	No	post	yes	post	1	60	Yes	60_69	yes	yes	999	no	not_too_far	yes	uuid:32b925bf-2861-402d-9d6d-7cc2b8b3f9f0	dk					uuid:32b925bf-2861-402d-9d6d-7cc2b8b3f9f0	na					uuid:32b925bf-2861-402d-9d6d-7cc2b8b3f9f0	help_me					uuid:32b925bf-2861-402d-9d6d-7cc2b8b3f9f0	unknown					uuid:32b925bf-2861-402d-9d6d-7cc2b8b3f9f0
uuid:32f5b4d0-ffec-40b5-a877-c51d5b711f28	yes	no	2	yes	yes	58	am		female	na	No	post	yes	post	3	54	Yes	50_59	yes	yes	999	yes	close	yes	uuid:32f5b4d0-ffec-40b5-a877-c51d5b711f28	pregnant					uuid:32f5b4d0-ffec-40b5-a877-c51d5b711f28	action					uuid:32f5b4d0-ffec-40b5-a877-c51d5b711f28	uk					uuid:32f5b4d0-ffec-40b5-a877-c51d5b711f28	n/a					uuid:32f5b4d0-ffec-40b5-a877-c51d5b711f28
uuid:32fb4611-a646-4582-a3b2-16db0c913ff6	yes	no	1	yes	no	2635	Gr		female	na	Primary	home	yes	post	1	22	Yes	18_29	yes	yes	999	yes	close	yes	uuid:32fb4611-a646-4582-a3b2-16db0c913ff6	Children_unk					uuid:32fb4611-a646-4582-a3b2-16db0c913ff6	action					uuid:32fb4611-a646-4582-a3b2-16db0c913ff6	na_already_convinced					uuid:32fb4611-a646-4582-a3b2-16db0c913ff6	iftreat					uuid:32fb4611-a646-4582-a3b2-16db0c913ff6
uuid:3320a7d9-94be-4f3f-adcc-c48240ca61a1	yes	no	5	yes	yes	176	am		male	na	No	post	yes	post	3	48	Yes	40_49	no	yes	999	yes	close	yes	uuid:3320a7d9-94be-4f3f-adcc-c48240ca61a1	dk					uuid:3320a7d9-94be-4f3f-adcc-c48240ca61a1	dk					uuid:3320a7d9-94be-4f3f-adcc-c48240ca61a1	side_effect					uuid:3320a7d9-94be-4f3f-adcc-c48240ca61a1	n/a					uuid:3320a7d9-94be-4f3f-adcc-c48240ca61a1
uuid:3343a78e-5cd4-4cec-b6cc-91d21e588543	yes	no	2	yes	yes	64	ma		female	na	No	post	yes	post	3	55	Yes	50_59	yes	yes	999	yes	not_too_far	yes	uuid:3343a78e-5cd4-4cec-b6cc-91d21e588543	pregnant					uuid:3343a78e-5cd4-4cec-b6cc-91d21e588543	dk					uuid:3343a78e-5cd4-4cec-b6cc-91d21e588543	na_already_convinced					uuid:3343a78e-5cd4-4cec-b6cc-91d21e588543	clean_water					uuid:3343a78e-5cd4-4cec-b6cc-91d21e588543
uuid:335760e0-02e9-4195-9f96-90110cadd349	dk	no	1	dk	na	2660	Fsf		male	na	Some_secondary	na	dk	na	999	70	No	70_79	no	na	999	na	na_not_aware_post	no	uuid:335760e0-02e9-4195-9f96-90110cadd349	dk					uuid:335760e0-02e9-4195-9f96-90110cadd349	na					uuid:335760e0-02e9-4195-9f96-90110cadd349	uk					uuid:335760e0-02e9-4195-9f96-90110cadd349	n/a					uuid:335760e0-02e9-4195-9f96-90110cadd349
uuid:338e6e10-4b69-4741-b801-c5a1420a6e70	yes	no	1	dk	na	277	Jm		male	na	No	na	no	na	999	48	Yes	40_49	yes	na	999	na	not_too_far	no	uuid:338e6e10-4b69-4741-b801-c5a1420a6e70	dk					uuid:338e6e10-4b69-4741-b801-c5a1420a6e70	na					uuid:338e6e10-4b69-4741-b801-c5a1420a6e70	side_effect					uuid:338e6e10-4b69-4741-b801-c5a1420a6e70	unknown					uuid:338e6e10-4b69-4741-b801-c5a1420a6e70
uuid:33a8bc63-246b-4307-a363-6103affc787b	yes	no	3	yes	yes	102	Ld	Ndhc	male	1	Primary	post	yes	post	3	57	Yes	50_59	yes	yes	999	no	not_too_far	yes	uuid:33a8bc63-246b-4307-a363-6103affc787b	pregnant					uuid:33a8bc63-246b-4307-a363-6103affc787b	na					uuid:33a8bc63-246b-4307-a363-6103affc787b	side_effect					uuid:33a8bc63-246b-4307-a363-6103affc787b	unknown					uuid:33a8bc63-246b-4307-a363-6103affc787b
uuid:33da6e14-2aa1-47ae-8bbe-ccc1d9e188e5	no	no	5	yes	yes	231	Gc		female	na	Primary	post	yes	post	1	26	Yes	18_29	no	yes	999	no	close	yes	uuid:33da6e14-2aa1-47ae-8bbe-ccc1d9e188e5	pregnant					uuid:33da6e14-2aa1-47ae-8bbe-ccc1d9e188e5	na					uuid:33da6e14-2aa1-47ae-8bbe-ccc1d9e188e5	side_effect					uuid:33da6e14-2aa1-47ae-8bbe-ccc1d9e188e5	n/a					uuid:33da6e14-2aa1-47ae-8bbe-ccc1d9e188e5
uuid:33e1f63c-248d-4990-961f-2076c73c02e6	yes	no	1	yes	yes	25	Csp		male	na	Some_secondary	post	yes	post	1	51	Yes	50_59	yes	yes	999	no	not_too_far	yes	uuid:33e1f63c-248d-4990-961f-2076c73c02e6	pregnant					uuid:33e1f63c-248d-4990-961f-2076c73c02e6	na					uuid:33e1f63c-248d-4990-961f-2076c73c02e6	na_already_convinced					uuid:33e1f63c-248d-4990-961f-2076c73c02e6	clean_water					uuid:33e1f63c-248d-4990-961f-2076c73c02e6
uuid:340f6cc5-e1ed-4f5a-8f25-13ddb25afa2e	other	dk	4	yes	yes	204	A d		female	na	No	home	yes	other	1	24	Yes	18_29	yes	yes	999	yes	other	yes	uuid:340f6cc5-e1ed-4f5a-8f25-13ddb25afa2e	dk					uuid:340f6cc5-e1ed-4f5a-8f25-13ddb25afa2e	action					uuid:340f6cc5-e1ed-4f5a-8f25-13ddb25afa2e	help_me					uuid:340f6cc5-e1ed-4f5a-8f25-13ddb25afa2e	unknown					uuid:340f6cc5-e1ed-4f5a-8f25-13ddb25afa2e
uuid:34288b42-6227-4c6e-90ac-666f6e9ee368	yes	no	1	no	na	295	Ty		female	na	Some_secondary	na	yes	na	1	27	Yes	18_29	yes	no	999	na	na_not_aware_post	no	uuid:34288b42-6227-4c6e-90ac-666f6e9ee368	pregnant					uuid:34288b42-6227-4c6e-90ac-666f6e9ee368	na					uuid:34288b42-6227-4c6e-90ac-666f6e9ee368	other					uuid:34288b42-6227-4c6e-90ac-666f6e9ee368	bednets					uuid:34288b42-6227-4c6e-90ac-666f6e9ee368
uuid:3436dd01-ca9c-4cf6-9464-b30b84619088	yes	no	1	yes	yes	2628	fa		male	na	Some_secondary	post	yes	post	2	18	Yes	18_29	yes	yes	5	no	close	yes	uuid:3436dd01-ca9c-4cf6-9464-b30b84619088	pregnant					uuid:3436dd01-ca9c-4cf6-9464-b30b84619088	na					uuid:3436dd01-ca9c-4cf6-9464-b30b84619088	na_already_convinced					uuid:3436dd01-ca9c-4cf6-9464-b30b84619088	clean_water					uuid:3436dd01-ca9c-4cf6-9464-b30b84619088
uuid:343c911c-9c24-40ee-883d-cca9391d8a21	yes	no	1	yes	yes	2659	Fc		female	na	Some_secondary	home	yes	post	2	27	Yes	18_29	yes	yes	999	no	not_too_far	yes	uuid:343c911c-9c24-40ee-883d-cca9391d8a21	pregnant					uuid:343c911c-9c24-40ee-883d-cca9391d8a21	na					uuid:343c911c-9c24-40ee-883d-cca9391d8a21	na_already_convinced					uuid:343c911c-9c24-40ee-883d-cca9391d8a21	clean_water					uuid:343c911c-9c24-40ee-883d-cca9391d8a21
uuid:347de0e6-3db5-4cf4-b8c4-758e2cede7be	yes	no	1	yes	yes	584	Il		male	na	Primary	post	yes	post	2	61	Yes	60_69	yes	yes	999	no	close	yes	uuid:347de0e6-3db5-4cf4-b8c4-758e2cede7be	dk					uuid:347de0e6-3db5-4cf4-b8c4-758e2cede7be	na					uuid:347de0e6-3db5-4cf4-b8c4-758e2cede7be	na_already_convinced					uuid:347de0e6-3db5-4cf4-b8c4-758e2cede7be	clean_water					uuid:347de0e6-3db5-4cf4-b8c4-758e2cede7be
uuid:34a46617-7103-4002-89af-d2544ef2b659	yes	no	1	yes	yes	2815	nl		female	na	Some_secondary	school	yes	school	1	20	Yes	18_29	yes	yes	999	yes	not_too_far	yes	uuid:34a46617-7103-4002-89af-d2544ef2b659	pregnant					uuid:34a46617-7103-4002-89af-d2544ef2b659	action					uuid:34a46617-7103-4002-89af-d2544ef2b659	na_already_convinced					uuid:34a46617-7103-4002-89af-d2544ef2b659	clean_water					uuid:34a46617-7103-4002-89af-d2544ef2b659
uuid:34ba3b4b-c5a7-423d-9b0f-8b9cd229fc11	yes	no	5	yes	yes	1062	Rs		male	na	No	post	yes	post	3	52	Yes	50_59	yes	yes	999	no	close	yes	uuid:34ba3b4b-c5a7-423d-9b0f-8b9cd229fc11	pregnant					uuid:34ba3b4b-c5a7-423d-9b0f-8b9cd229fc11	na					uuid:34ba3b4b-c5a7-423d-9b0f-8b9cd229fc11	help_me					uuid:34ba3b4b-c5a7-423d-9b0f-8b9cd229fc11	clean_water					uuid:34ba3b4b-c5a7-423d-9b0f-8b9cd229fc11
uuid:34e0cb49-d6b2-4d2e-bf82-94aeb71d44f9	dk	dk	3	yes	na	2800	Cw	Vyjd	female	na	Finish_primary	na	dk	na	999	36	Yes	30_39	yes	na	999	na	dk	no	uuid:34e0cb49-d6b2-4d2e-bf82-94aeb71d44f9	pregnant					uuid:34e0cb49-d6b2-4d2e-bf82-94aeb71d44f9	na					uuid:34e0cb49-d6b2-4d2e-bf82-94aeb71d44f9	help_family					uuid:34e0cb49-d6b2-4d2e-bf82-94aeb71d44f9	unknown					uuid:34e0cb49-d6b2-4d2e-bf82-94aeb71d44f9
uuid:34e858e9-b320-4441-b07a-df9855ada42e	yes	no	5	yes	yes	316	Je		female	na	University	school	yes	post	3	51	Yes	50_59	yes	yes	999	no	close	yes	uuid:34e858e9-b320-4441-b07a-df9855ada42e	pregnant					uuid:34e858e9-b320-4441-b07a-df9855ada42e	na					uuid:34e858e9-b320-4441-b07a-df9855ada42e	na_already_convinced					uuid:34e858e9-b320-4441-b07a-df9855ada42e	bednets					uuid:34e858e9-b320-4441-b07a-df9855ada42e
uuid:34f68e40-c7bb-4ef2-9034-6c8164df8523	yes	no	5	yes	yes	215	Wj	C menaj sa yo selman ki genyen moun yo al ret nan bewou paske le rivye a desann yo pa ka al nan bouk.	male	1	Primary	post	yes	post	3	66	No	60_69	no	yes	999	no	close	yes	uuid:34f68e40-c7bb-4ef2-9034-6c8164df8523	Children_under_1					uuid:34f68e40-c7bb-4ef2-9034-6c8164df8523	na					uuid:34f68e40-c7bb-4ef2-9034-6c8164df8523	uk					uuid:34f68e40-c7bb-4ef2-9034-6c8164df8523	n/a					uuid:34f68e40-c7bb-4ef2-9034-6c8164df8523
uuid:352d8586-cffe-4770-a0ac-66623e972672	yes	no	5	yes	yes	2710	Ne		female	na	Primary	post	yes	post	1	38	Yes	30_39	yes	yes	999	no	close	yes	uuid:352d8586-cffe-4770-a0ac-66623e972672	pregnant					uuid:352d8586-cffe-4770-a0ac-66623e972672	na					uuid:352d8586-cffe-4770-a0ac-66623e972672	side_effect					uuid:352d8586-cffe-4770-a0ac-66623e972672	clean_water					uuid:352d8586-cffe-4770-a0ac-66623e972672
uuid:352d8e80-7091-46a1-85a0-ad29f2211e0c	yes	no	5	yes	yes	204	La		female	1	No	school	yes	school	3	33	Yes	30_39	unknown	yes	999	yes	close	yes	uuid:352d8e80-7091-46a1-85a0-ad29f2211e0c	Children_under_1					uuid:352d8e80-7091-46a1-85a0-ad29f2211e0c	not_eat					uuid:352d8e80-7091-46a1-85a0-ad29f2211e0c	uk					uuid:352d8e80-7091-46a1-85a0-ad29f2211e0c	n/a					uuid:352d8e80-7091-46a1-85a0-ad29f2211e0c
uuid:35ab1cde-43e4-417f-beff-080ed8aa8ae7	yes	no	1	yes	yes	43	Fw		male	na	Some_secondary	post	no	post	0	18	Yes	18_29	yes	yes	999	no	close	yes	uuid:35ab1cde-43e4-417f-beff-080ed8aa8ae7	pregnant					uuid:35ab1cde-43e4-417f-beff-080ed8aa8ae7	na					uuid:35ab1cde-43e4-417f-beff-080ed8aa8ae7	na_already_convinced					uuid:35ab1cde-43e4-417f-beff-080ed8aa8ae7	unknown					uuid:35ab1cde-43e4-417f-beff-080ed8aa8ae7
uuid:35b43fbd-6bfc-4a3c-b963-6ab3e1cbfef9	other	no	1	yes	na	24	Smc		female	na	Some_secondary	na	yes	na	1	32	Yes	30_39	no	na	999	na	not_too_far	no	uuid:35b43fbd-6bfc-4a3c-b963-6ab3e1cbfef9	pregnant					uuid:35b43fbd-6bfc-4a3c-b963-6ab3e1cbfef9	na					uuid:35b43fbd-6bfc-4a3c-b963-6ab3e1cbfef9	na_already_convinced					uuid:35b43fbd-6bfc-4a3c-b963-6ab3e1cbfef9	clean_water					uuid:35b43fbd-6bfc-4a3c-b963-6ab3e1cbfef9
uuid:35d1bd49-dfe9-4657-838c-3223101f4874	yes	no	2	yes	no	2787	Ab		male	na	Some_secondary	school	yes	school	2	23	Yes	18_29	yes	no	999	no	other	yes	uuid:35d1bd49-dfe9-4657-838c-3223101f4874	pregnant					uuid:35d1bd49-dfe9-4657-838c-3223101f4874	na					uuid:35d1bd49-dfe9-4657-838c-3223101f4874	side_effect					uuid:35d1bd49-dfe9-4657-838c-3223101f4874	clean_water					uuid:35d1bd49-dfe9-4657-838c-3223101f4874
uuid:36102bdc-6d82-42bf-bc79-c66784872bc3	yes	no	2	yes	yes	452	ai		female	na	Primary	post	yes	post	2	26	Yes	18_29	yes	yes	999	yes	close	yes	uuid:36102bdc-6d82-42bf-bc79-c66784872bc3	pregnant					uuid:36102bdc-6d82-42bf-bc79-c66784872bc3	action					uuid:36102bdc-6d82-42bf-bc79-c66784872bc3	na_already_convinced					uuid:36102bdc-6d82-42bf-bc79-c66784872bc3	unknown					uuid:36102bdc-6d82-42bf-bc79-c66784872bc3
uuid:36146126-8000-4d35-b0f6-7aba5d81339a	yes	no	5	yes	yes	213	Ji	Gen yon timoun twazan li di li t bwe men nan dat la li pa gen laj poul t bwe	female	1	Primary	school	yes	school	3	36	Yes	30_39	yes	yes	999	yes	close	yes	uuid:36146126-8000-4d35-b0f6-7aba5d81339a	pregnant					uuid:36146126-8000-4d35-b0f6-7aba5d81339a	dk					uuid:36146126-8000-4d35-b0f6-7aba5d81339a	uk					uuid:36146126-8000-4d35-b0f6-7aba5d81339a	n/a					uuid:36146126-8000-4d35-b0f6-7aba5d81339a
uuid:3636f16a-f94e-4d1e-badb-804dd4fb1f01	yes	no	4	yes	yes	2509	Jg	Fts	male	na	Primary	post	yes	post	2	40	No	40_49	yes	yes	999	no	not_too_far	yes	uuid:3636f16a-f94e-4d1e-badb-804dd4fb1f01	pregnant					uuid:3636f16a-f94e-4d1e-badb-804dd4fb1f01	dk					uuid:3636f16a-f94e-4d1e-badb-804dd4fb1f01	na_already_convinced					uuid:3636f16a-f94e-4d1e-badb-804dd4fb1f01	unknown					uuid:3636f16a-f94e-4d1e-badb-804dd4fb1f01
uuid:365c177c-fb3d-49c8-b2be-97b1312bf27d	yes	no	3	yes	yes	630	Nb	Gyb	female	1	Primary	post	no	post	2	25	Yes	18_29	yes	yes	999	yes	close	yes	uuid:365c177c-fb3d-49c8-b2be-97b1312bf27d	pregnant					uuid:365c177c-fb3d-49c8-b2be-97b1312bf27d	dk					uuid:365c177c-fb3d-49c8-b2be-97b1312bf27d	help_me					uuid:365c177c-fb3d-49c8-b2be-97b1312bf27d	unknown					uuid:365c177c-fb3d-49c8-b2be-97b1312bf27d
uuid:36700a42-2bbe-4774-97fc-581f3cd25167	na_not_aware_of_post	dk	5	yes	na	292	Er		male	na	Primary	na	no	na	0	23	No	18_29	yes	na	999	na	na_not_aware_post	no	uuid:36700a42-2bbe-4774-97fc-581f3cd25167	dk					uuid:36700a42-2bbe-4774-97fc-581f3cd25167	na					uuid:36700a42-2bbe-4774-97fc-581f3cd25167	help_me					uuid:36700a42-2bbe-4774-97fc-581f3cd25167	n/a					uuid:36700a42-2bbe-4774-97fc-581f3cd25167
uuid:3671ff33-fd83-4bd1-b183-40a719f5eaa1	yes	no	2	yes	yes	252	mc		female	na	No	post	yes	post	3	35	Yes	30_39	yes	yes	999	no	close	yes	uuid:3671ff33-fd83-4bd1-b183-40a719f5eaa1	dk					uuid:3671ff33-fd83-4bd1-b183-40a719f5eaa1	dk					uuid:3671ff33-fd83-4bd1-b183-40a719f5eaa1	uk					uuid:3671ff33-fd83-4bd1-b183-40a719f5eaa1	unknown					uuid:3671ff33-fd83-4bd1-b183-40a719f5eaa1
uuid:367e763e-6e0f-44ac-9b8d-fd8c11999349	yes	no	5	yes	yes	297	Ac		female	na	Finish_primary	post	yes	post	3	24	Yes	18_29	yes	yes	999	no	not_too_far	yes	uuid:367e763e-6e0f-44ac-9b8d-fd8c11999349	pregnant					uuid:367e763e-6e0f-44ac-9b8d-fd8c11999349	na					uuid:367e763e-6e0f-44ac-9b8d-fd8c11999349	side_effect					uuid:367e763e-6e0f-44ac-9b8d-fd8c11999349	bednets					uuid:367e763e-6e0f-44ac-9b8d-fd8c11999349
uuid:36fbf10b-8049-4ef5-9973-99aeb238d303	yes	no	4	yes	yes	162	A m		male	na	Some_secondary	school	yes	school	999	28	Yes	18_29	yes	yes	900	no	not_too_far	yes	uuid:36fbf10b-8049-4ef5-9973-99aeb238d303	Children_under_1					uuid:36fbf10b-8049-4ef5-9973-99aeb238d303	na					uuid:36fbf10b-8049-4ef5-9973-99aeb238d303	help_me					uuid:36fbf10b-8049-4ef5-9973-99aeb238d303	clean_water					uuid:36fbf10b-8049-4ef5-9973-99aeb238d303
uuid:370954cb-7de2-4832-ac1d-bd24ec5027f9	yes	no	1	yes	yes	604	ag		female	na	Primary	post	yes	post	1	34	Yes	30_39	yes	yes	999	yes	not_too_far	yes	uuid:370954cb-7de2-4832-ac1d-bd24ec5027f9	pregnant					uuid:370954cb-7de2-4832-ac1d-bd24ec5027f9	action					uuid:370954cb-7de2-4832-ac1d-bd24ec5027f9	na_already_convinced					uuid:370954cb-7de2-4832-ac1d-bd24ec5027f9	bednets					uuid:370954cb-7de2-4832-ac1d-bd24ec5027f9
uuid:37696cbf-b848-4861-9401-dbb71699cfa2	dk	dk	2	yes	na	67	jb		male	na	Primary	na	yes	na	2	30	Yes	30_39	yes	na	999	na	dk	no	uuid:37696cbf-b848-4861-9401-dbb71699cfa2	pregnant					uuid:37696cbf-b848-4861-9401-dbb71699cfa2	na					uuid:37696cbf-b848-4861-9401-dbb71699cfa2	uk					uuid:37696cbf-b848-4861-9401-dbb71699cfa2	clean_water					uuid:37696cbf-b848-4861-9401-dbb71699cfa2
uuid:377c623b-8bf1-4935-8003-e6a07c5641ae	yes	no	1	yes	yes	2608	Jwc		male	na	Some_secondary	post	yes	post	1	19	Yes	18_29	yes	yes	999	no	close	yes	uuid:377c623b-8bf1-4935-8003-e6a07c5641ae	pregnant					uuid:377c623b-8bf1-4935-8003-e6a07c5641ae	na					uuid:377c623b-8bf1-4935-8003-e6a07c5641ae	na_already_convinced					uuid:377c623b-8bf1-4935-8003-e6a07c5641ae	iftreat					uuid:377c623b-8bf1-4935-8003-e6a07c5641ae
uuid:377d594b-820e-4266-a7b9-88b6fa16a2e5	yes	no	3	yes	yes	2795	Nj	Vdud	male	1	Some_secondary	school	yes	school	3	22	Yes	18_29	yes	yes	999	yes	not_too_far	yes	uuid:377d594b-820e-4266-a7b9-88b6fa16a2e5	pregnant					uuid:377d594b-820e-4266-a7b9-88b6fa16a2e5	dk					uuid:377d594b-820e-4266-a7b9-88b6fa16a2e5	help_family					uuid:377d594b-820e-4266-a7b9-88b6fa16a2e5	unknown					uuid:377d594b-820e-4266-a7b9-88b6fa16a2e5
uuid:37925ee0-a17f-4a95-bccf-aa86efe74fce	yes	no	1	dk	yes	2596	ky		female	na	Some_secondary	na	no	post	999	18	Yes	18_29	yes	no	999	na	not_too_far	yes	uuid:37925ee0-a17f-4a95-bccf-aa86efe74fce	pregnant					uuid:37925ee0-a17f-4a95-bccf-aa86efe74fce	na					uuid:37925ee0-a17f-4a95-bccf-aa86efe74fce	side_effect					uuid:37925ee0-a17f-4a95-bccf-aa86efe74fce	clean_water					uuid:37925ee0-a17f-4a95-bccf-aa86efe74fce
uuid:37954576-f7fe-40d7-b132-666df442e939	yes	no	3	yes	yes	2796	It	Vfjf	female	1	No	home	yes	post	3	40	Yes	40_49	yes	yes	999	no	close	yes	uuid:37954576-f7fe-40d7-b132-666df442e939	pregnant					uuid:37954576-f7fe-40d7-b132-666df442e939	na					uuid:37954576-f7fe-40d7-b132-666df442e939	help_me					uuid:37954576-f7fe-40d7-b132-666df442e939	unknown					uuid:37954576-f7fe-40d7-b132-666df442e939
uuid:37c6e5ca-2299-42ec-9b6a-ff3a02b1e665	yes	no	2	yes	yes	260	ms		male	na	No	post	yes	post	3	70	Yes	70_79	yes	yes	999	no	close	yes	uuid:37c6e5ca-2299-42ec-9b6a-ff3a02b1e665	dk					uuid:37c6e5ca-2299-42ec-9b6a-ff3a02b1e665	dk					uuid:37c6e5ca-2299-42ec-9b6a-ff3a02b1e665	uk					uuid:37c6e5ca-2299-42ec-9b6a-ff3a02b1e665	unknown					uuid:37c6e5ca-2299-42ec-9b6a-ff3a02b1e665
uuid:37defde1-297f-49d2-b206-a0ddfcef9118	yes	no	5	yes	yes	231	Pb		male	na	Finish_primary	post	yes	post	2	34	Yes	30_39	yes	yes	999	no	not_too_far	yes	uuid:37defde1-297f-49d2-b206-a0ddfcef9118	pregnant					uuid:37defde1-297f-49d2-b206-a0ddfcef9118	na					uuid:37defde1-297f-49d2-b206-a0ddfcef9118	help_me					uuid:37defde1-297f-49d2-b206-a0ddfcef9118	clean_water					uuid:37defde1-297f-49d2-b206-a0ddfcef9118
uuid:37ea6066-fe3f-44ff-b43c-e596734c1786	yes	no	4	yes	dk	258	F m		female	na	No	home	yes	home	999	83	Yes	80_89	yes	yes	999	yes	other	yes	uuid:37ea6066-fe3f-44ff-b43c-e596734c1786	dk					uuid:37ea6066-fe3f-44ff-b43c-e596734c1786	dk					uuid:37ea6066-fe3f-44ff-b43c-e596734c1786	uk					uuid:37ea6066-fe3f-44ff-b43c-e596734c1786	bednets					uuid:37ea6066-fe3f-44ff-b43c-e596734c1786
uuid:37f86925-101f-4ac8-8dd1-93932d36bc7c	yes	no	5	yes	yes	2677	Rt		female	na	No	post	yes	post	1	49	Yes	40_49	no	yes	999	no	not_too_far	yes	uuid:37f86925-101f-4ac8-8dd1-93932d36bc7c	pregnant					uuid:37f86925-101f-4ac8-8dd1-93932d36bc7c	na					uuid:37f86925-101f-4ac8-8dd1-93932d36bc7c	help_family					uuid:37f86925-101f-4ac8-8dd1-93932d36bc7c	n/a					uuid:37f86925-101f-4ac8-8dd1-93932d36bc7c
uuid:37f893b3-4774-4bf4-a6c3-63af99f9f6e1	dk	dk	3	yes	na	855	Li	Fhb	female	dk	Finish_primary	na	no	na	0	27	Yes	18_29	yes	na	999	na	dk	no	uuid:37f893b3-4774-4bf4-a6c3-63af99f9f6e1	pregnant					uuid:37f893b3-4774-4bf4-a6c3-63af99f9f6e1	na					uuid:37f893b3-4774-4bf4-a6c3-63af99f9f6e1	help_me					uuid:37f893b3-4774-4bf4-a6c3-63af99f9f6e1	unknown					uuid:37f893b3-4774-4bf4-a6c3-63af99f9f6e1
uuid:380d5316-f4f7-41c9-87b5-651f54cd12f5	dk	dk	2	yes	na	312	sf	d4 li pat bwe medicament paske yo pat vinn bay li nan zone nan	female	na	Primary	na	no	na	999	25	Yes	18_29	yes	na	999	na	dk	no	uuid:380d5316-f4f7-41c9-87b5-651f54cd12f5	dk					uuid:380d5316-f4f7-41c9-87b5-651f54cd12f5	na					uuid:380d5316-f4f7-41c9-87b5-651f54cd12f5	uk					uuid:380d5316-f4f7-41c9-87b5-651f54cd12f5	clean_water					uuid:380d5316-f4f7-41c9-87b5-651f54cd12f5
uuid:381f776f-a8ee-4a68-8826-760770e61d08	yes	no	2	yes	yes	959	os		male	na	Some_secondary	post	yes	post	1	73	Yes	70_79	yes	yes	999	no	close	yes	uuid:381f776f-a8ee-4a68-8826-760770e61d08	pregnant					uuid:381f776f-a8ee-4a68-8826-760770e61d08	na					uuid:381f776f-a8ee-4a68-8826-760770e61d08	na_already_convinced					uuid:381f776f-a8ee-4a68-8826-760770e61d08	unknown					uuid:381f776f-a8ee-4a68-8826-760770e61d08
uuid:38256fa6-b682-4968-88e4-c7fb279d271c	yes	no	5	yes	yes	421	Fs		female	na	Finish_primary	post	yes	post	2	34	Yes	30_39	yes	yes	999	no	close	yes	uuid:38256fa6-b682-4968-88e4-c7fb279d271c	pregnant					uuid:38256fa6-b682-4968-88e4-c7fb279d271c	na					uuid:38256fa6-b682-4968-88e4-c7fb279d271c	na_already_convinced					uuid:38256fa6-b682-4968-88e4-c7fb279d271c	clean_water					uuid:38256fa6-b682-4968-88e4-c7fb279d271c
uuid:384ec4f9-c9f2-49db-b0bd-4910c25b8217	yes	no	1	yes	na	2638	Ej		female	na	Primary	na	no	na	0	27	Yes	18_29	yes	no	999	na	na_not_aware_post	yes	uuid:384ec4f9-c9f2-49db-b0bd-4910c25b8217	pregnant					uuid:384ec4f9-c9f2-49db-b0bd-4910c25b8217	na					uuid:384ec4f9-c9f2-49db-b0bd-4910c25b8217	help_me					uuid:384ec4f9-c9f2-49db-b0bd-4910c25b8217	bednets					uuid:384ec4f9-c9f2-49db-b0bd-4910c25b8217
uuid:3855d5ce-3d71-4032-83e2-6b5b04e61feb	yes	no	5	yes	yes	243	Aw		male	dk	Some_secondary	post	yes	post	1	22	Yes	18_29	yes	yes	999	no	close	yes	uuid:3855d5ce-3d71-4032-83e2-6b5b04e61feb	pregnant					uuid:3855d5ce-3d71-4032-83e2-6b5b04e61feb	na					uuid:3855d5ce-3d71-4032-83e2-6b5b04e61feb	help_me					uuid:3855d5ce-3d71-4032-83e2-6b5b04e61feb	bednets					uuid:3855d5ce-3d71-4032-83e2-6b5b04e61feb
uuid:38a2593c-98da-4547-89ef-2d43fce1357f	dk	dk	2	yes	na	455	gb		female	na	No	na	no	na	999	25	Yes	18_29	yes	na	999	na	dk	no	uuid:38a2593c-98da-4547-89ef-2d43fce1357f	pregnant					uuid:38a2593c-98da-4547-89ef-2d43fce1357f	na					uuid:38a2593c-98da-4547-89ef-2d43fce1357f	uk					uuid:38a2593c-98da-4547-89ef-2d43fce1357f	unknown					uuid:38a2593c-98da-4547-89ef-2d43fce1357f
uuid:38bc993f-7ef1-490e-bfa3-c4280065c02f	yes	no	1	yes	yes	5	Ls		female	na	No	post	yes	post	1	63	Yes	60_69	yes	yes	999	no	not_too_far	yes	uuid:38bc993f-7ef1-490e-bfa3-c4280065c02f	pregnant					uuid:38bc993f-7ef1-490e-bfa3-c4280065c02f	na					uuid:38bc993f-7ef1-490e-bfa3-c4280065c02f	na_already_convinced					uuid:38bc993f-7ef1-490e-bfa3-c4280065c02f	iftreat					uuid:38bc993f-7ef1-490e-bfa3-c4280065c02f
uuid:38cbbb95-a94a-442c-9b9d-ce3ba8a8fcc2	yes	no	1	yes	yes	15	Ev		female	na	Finish_primary	post	no	post	0	26	Yes	18_29	yes	yes	999	no	close	yes	uuid:38cbbb95-a94a-442c-9b9d-ce3ba8a8fcc2	pregnant					uuid:38cbbb95-a94a-442c-9b9d-ce3ba8a8fcc2	na					uuid:38cbbb95-a94a-442c-9b9d-ce3ba8a8fcc2	na_already_convinced					uuid:38cbbb95-a94a-442c-9b9d-ce3ba8a8fcc2	iftreat					uuid:38cbbb95-a94a-442c-9b9d-ce3ba8a8fcc2
uuid:38d4a5a4-967e-4c6a-a2f7-386d70699282	yes	no	1	yes	yes	2816	Wjb		male	na	Finish_primary	post	yes	post	1	25	Yes	18_29	yes	yes	999	no	close	yes	uuid:38d4a5a4-967e-4c6a-a2f7-386d70699282	Children_unk					uuid:38d4a5a4-967e-4c6a-a2f7-386d70699282	action					uuid:38d4a5a4-967e-4c6a-a2f7-386d70699282	na_already_convinced					uuid:38d4a5a4-967e-4c6a-a2f7-386d70699282	clean_water					uuid:38d4a5a4-967e-4c6a-a2f7-386d70699282
uuid:38ee8059-697d-402b-b7f1-5c85e2ffc081	yes	no	5	yes	yes	438	Aa		female	na	No	post	yes	post	2	50	Yes	50_59	yes	yes	999	no	close	yes	uuid:38ee8059-697d-402b-b7f1-5c85e2ffc081	pregnant					uuid:38ee8059-697d-402b-b7f1-5c85e2ffc081	na					uuid:38ee8059-697d-402b-b7f1-5c85e2ffc081	help_me					uuid:38ee8059-697d-402b-b7f1-5c85e2ffc081	clean_water					uuid:38ee8059-697d-402b-b7f1-5c85e2ffc081
uuid:394bbf54-b857-410b-9dac-2b65923ae906	yes	no	1	yes	yes	2598	ml		female	na	Some_secondary	school	yes	school	2	18	Yes	18_29	yes	yes	999	no	na_not_aware_post	yes	uuid:394bbf54-b857-410b-9dac-2b65923ae906	pregnant					uuid:394bbf54-b857-410b-9dac-2b65923ae906	na					uuid:394bbf54-b857-410b-9dac-2b65923ae906	na_already_convinced					uuid:394bbf54-b857-410b-9dac-2b65923ae906	clean_water					uuid:394bbf54-b857-410b-9dac-2b65923ae906
uuid:3958ff99-4d66-4dac-a732-57bd018c3b5b	yes	no	3	yes	yes	133	Aj	Hdg	female	1	Finish_primary	home	no	post	1	25	Yes	18_29	yes	yes	999	no	close	yes	uuid:3958ff99-4d66-4dac-a732-57bd018c3b5b	pregnant					uuid:3958ff99-4d66-4dac-a732-57bd018c3b5b	na					uuid:3958ff99-4d66-4dac-a732-57bd018c3b5b	side_effect					uuid:3958ff99-4d66-4dac-a732-57bd018c3b5b	unknown					uuid:3958ff99-4d66-4dac-a732-57bd018c3b5b
uuid:3962da28-71aa-4e66-a0c6-57a2564b08d6	yes	no	5	yes	yes	241	Hd		female	na	Some_secondary	post	yes	post	3	26	Yes	18_29	yes	yes	999	yes	close	yes	uuid:3962da28-71aa-4e66-a0c6-57a2564b08d6	pregnant					uuid:3962da28-71aa-4e66-a0c6-57a2564b08d6	action					uuid:3962da28-71aa-4e66-a0c6-57a2564b08d6	na_already_convinced					uuid:3962da28-71aa-4e66-a0c6-57a2564b08d6	iftreat					uuid:3962da28-71aa-4e66-a0c6-57a2564b08d6
uuid:39837f9e-0e2d-4e61-8422-8743d6f985f9	yes	no	3	yes	no	533	Jp	Bfh	male	1	Finish_primary	post	no	post	2	39	No	30_39	yes	yes	999	yes	close	yes	uuid:39837f9e-0e2d-4e61-8422-8743d6f985f9	dk					uuid:39837f9e-0e2d-4e61-8422-8743d6f985f9	dk					uuid:39837f9e-0e2d-4e61-8422-8743d6f985f9	side_effect					uuid:39837f9e-0e2d-4e61-8422-8743d6f985f9	unknown					uuid:39837f9e-0e2d-4e61-8422-8743d6f985f9
uuid:39849a72-dca6-45f5-bc45-975665934a28	yes	no	5	yes	yes	272	Ep		female	na	Primary	post	yes	post	3	20	Yes	18_29	yes	yes	999	no	close	yes	uuid:39849a72-dca6-45f5-bc45-975665934a28	pregnant					uuid:39849a72-dca6-45f5-bc45-975665934a28	na					uuid:39849a72-dca6-45f5-bc45-975665934a28	help_me					uuid:39849a72-dca6-45f5-bc45-975665934a28	unknown					uuid:39849a72-dca6-45f5-bc45-975665934a28
uuid:39c4802a-2139-40ba-bca1-e420f30be293	other	no	3	yes	other	130	Mp	Hfd	male	dk	Primary	home	yes	other	3	47	Yes	40_49	yes	yes	999	no	far	yes	uuid:39c4802a-2139-40ba-bca1-e420f30be293	dk					uuid:39c4802a-2139-40ba-bca1-e420f30be293	na					uuid:39c4802a-2139-40ba-bca1-e420f30be293	help_family					uuid:39c4802a-2139-40ba-bca1-e420f30be293	unknown					uuid:39c4802a-2139-40ba-bca1-e420f30be293
uuid:3a0351e8-3fbe-4be9-ab37-184f39943b94	yes	no	5	yes	yes	321	vi		female	na	No	post	yes	post	2	30	Yes	30_39	yes	yes	999	no	close	yes	uuid:3a0351e8-3fbe-4be9-ab37-184f39943b94	dk					uuid:3a0351e8-3fbe-4be9-ab37-184f39943b94	na					uuid:3a0351e8-3fbe-4be9-ab37-184f39943b94	na_already_convinced					uuid:3a0351e8-3fbe-4be9-ab37-184f39943b94	unknown					uuid:3a0351e8-3fbe-4be9-ab37-184f39943b94
uuid:3a1c15ed-fb21-4456-b9a3-8d0a4973a43e	yes	no	1	yes	yes	280	Sd		male	na	Primary	post	yes	post	2	18	Yes	18_29	yes	yes	999	no	close	yes	uuid:3a1c15ed-fb21-4456-b9a3-8d0a4973a43e	dk					uuid:3a1c15ed-fb21-4456-b9a3-8d0a4973a43e	na					uuid:3a1c15ed-fb21-4456-b9a3-8d0a4973a43e	na_already_convinced					uuid:3a1c15ed-fb21-4456-b9a3-8d0a4973a43e	clean_water					uuid:3a1c15ed-fb21-4456-b9a3-8d0a4973a43e
uuid:3a4cb617-b2be-43e9-a186-c9162ea4ab68	yes	no	1	yes	na	2803	ah		male	na	Some_secondary	na	no	na	0	25	No	18_29	yes	na	999	na	not_too_far	no	uuid:3a4cb617-b2be-43e9-a186-c9162ea4ab68	pregnant					uuid:3a4cb617-b2be-43e9-a186-c9162ea4ab68	na					uuid:3a4cb617-b2be-43e9-a186-c9162ea4ab68	na_already_convinced					uuid:3a4cb617-b2be-43e9-a186-c9162ea4ab68	unknown					uuid:3a4cb617-b2be-43e9-a186-c9162ea4ab68
uuid:3a769c43-a09c-46ab-a6e6-50092d1af104	yes	no	5	yes	yes	317	mj		male	na	Primary	post	yes	post	2	27	Yes	18_29	yes	yes	1	no	close	yes	uuid:3a769c43-a09c-46ab-a6e6-50092d1af104	pregnant					uuid:3a769c43-a09c-46ab-a6e6-50092d1af104	na					uuid:3a769c43-a09c-46ab-a6e6-50092d1af104	uk					uuid:3a769c43-a09c-46ab-a6e6-50092d1af104	bednets					uuid:3a769c43-a09c-46ab-a6e6-50092d1af104
uuid:3aa2bc1d-a635-4d2e-913f-2ccc252efb4a	yes	no	1	yes	yes	581	Jc		male	na	No	post	yes	post	2	25	Yes	18_29	yes	yes	999	no	not_too_far	yes	uuid:3aa2bc1d-a635-4d2e-913f-2ccc252efb4a	dk					uuid:3aa2bc1d-a635-4d2e-913f-2ccc252efb4a	na					uuid:3aa2bc1d-a635-4d2e-913f-2ccc252efb4a	na_already_convinced					uuid:3aa2bc1d-a635-4d2e-913f-2ccc252efb4a	mosquito					uuid:3aa2bc1d-a635-4d2e-913f-2ccc252efb4a
uuid:3ab21f8e-1fc5-4415-94b7-f426f8b5c2bc	yes	dk	4	dk	yes	2724	Mf	Oo	male	na	No	post	yes	post	2	66	Yes	60_69	yes	yes	5	yes	close	yes	uuid:3ab21f8e-1fc5-4415-94b7-f426f8b5c2bc	pregnant					uuid:3ab21f8e-1fc5-4415-94b7-f426f8b5c2bc	action					uuid:3ab21f8e-1fc5-4415-94b7-f426f8b5c2bc	help_me					uuid:3ab21f8e-1fc5-4415-94b7-f426f8b5c2bc	clean_water					uuid:3ab21f8e-1fc5-4415-94b7-f426f8b5c2bc
uuid:3ab7fa58-11f5-4dbc-86db-c5b09cc93e7f	other	dk	3	yes	yes	129	Pjm	Dub	female	dk	No	home	yes	home	3	30	Yes	30_39	yes	yes	999	no	other	yes	uuid:3ab7fa58-11f5-4dbc-86db-c5b09cc93e7f	pregnant					uuid:3ab7fa58-11f5-4dbc-86db-c5b09cc93e7f	na					uuid:3ab7fa58-11f5-4dbc-86db-c5b09cc93e7f	side_effect					uuid:3ab7fa58-11f5-4dbc-86db-c5b09cc93e7f	iftreat					uuid:3ab7fa58-11f5-4dbc-86db-c5b09cc93e7f
uuid:3abe4374-4272-4323-b866-e1f9b35b5185	yes	no	1	yes	yes	25	Vr		female	na	Primary	post	yes	post	2	999	Yes	60_69	yes	yes	999	no	not_too_far	yes	uuid:3abe4374-4272-4323-b866-e1f9b35b5185	Children_unk					uuid:3abe4374-4272-4323-b866-e1f9b35b5185	na					uuid:3abe4374-4272-4323-b866-e1f9b35b5185	uk					uuid:3abe4374-4272-4323-b866-e1f9b35b5185	bednets					uuid:3abe4374-4272-4323-b866-e1f9b35b5185
uuid:3ac89e9e-0092-45a8-b7b6-31e840fe2933	yes	no	5	yes	yes	1051	Na	Fomasyom moun yo manke fet	female	na	Primary	post	yes	post	1	28	Yes	18_29	no	yes	999	no	close	yes	uuid:3ac89e9e-0092-45a8-b7b6-31e840fe2933	pregnant					uuid:3ac89e9e-0092-45a8-b7b6-31e840fe2933	na					uuid:3ac89e9e-0092-45a8-b7b6-31e840fe2933	side_effect					uuid:3ac89e9e-0092-45a8-b7b6-31e840fe2933	n/a					uuid:3ac89e9e-0092-45a8-b7b6-31e840fe2933
uuid:3add812c-a182-42ed-960d-97b32065defa	yes	no	3	yes	yes	859	Jl	Bsyv	female	1	No	post	no	post	2	54	Yes	50_59	no	yes	999	no	not_too_far	yes	uuid:3add812c-a182-42ed-960d-97b32065defa	dk					uuid:3add812c-a182-42ed-960d-97b32065defa	na					uuid:3add812c-a182-42ed-960d-97b32065defa	help_me					uuid:3add812c-a182-42ed-960d-97b32065defa	n/a					uuid:3add812c-a182-42ed-960d-97b32065defa
uuid:3ae2d721-4d7a-4855-aac7-f6f819912d93	yes	no	2	yes	yes	2766	de		female	na	No	post	yes	post	1	45	Yes	40_49	yes	yes	999	no	close	yes	uuid:3ae2d721-4d7a-4855-aac7-f6f819912d93	pregnant					uuid:3ae2d721-4d7a-4855-aac7-f6f819912d93	na					uuid:3ae2d721-4d7a-4855-aac7-f6f819912d93	uk					uuid:3ae2d721-4d7a-4855-aac7-f6f819912d93	unknown					uuid:3ae2d721-4d7a-4855-aac7-f6f819912d93
uuid:3b07ec70-f53a-4d3f-9398-9479053e415e	yes	no	5	yes	yes	285	Ea		female	na	Primary	post	yes	post	3	33	Yes	30_39	yes	yes	999	no	close	yes	uuid:3b07ec70-f53a-4d3f-9398-9479053e415e	pregnant					uuid:3b07ec70-f53a-4d3f-9398-9479053e415e	na					uuid:3b07ec70-f53a-4d3f-9398-9479053e415e	help_me					uuid:3b07ec70-f53a-4d3f-9398-9479053e415e	iftreat					uuid:3b07ec70-f53a-4d3f-9398-9479053e415e
uuid:3b112db7-c35b-4a44-8fd2-058c6fd4846a	yes	yes	1	yes	yes	6	Jp		female	na	Some_secondary	post	yes	post	2	23	Yes	18_29	yes	yes	999	yes	close	yes	uuid:3b112db7-c35b-4a44-8fd2-058c6fd4846a	pregnant					uuid:3b112db7-c35b-4a44-8fd2-058c6fd4846a	action					uuid:3b112db7-c35b-4a44-8fd2-058c6fd4846a	na_already_convinced					uuid:3b112db7-c35b-4a44-8fd2-058c6fd4846a	clean_water					uuid:3b112db7-c35b-4a44-8fd2-058c6fd4846a
uuid:3b66d21f-3baa-4a60-a1d9-f14a66c04af1	dk	dk	3	dk	na	101	Eo	Hsc	female	na	Primary	na	no	na	1	24	No	18_29	yes	na	999	na	dk	no	uuid:3b66d21f-3baa-4a60-a1d9-f14a66c04af1	pregnant					uuid:3b66d21f-3baa-4a60-a1d9-f14a66c04af1	na					uuid:3b66d21f-3baa-4a60-a1d9-f14a66c04af1	help_family					uuid:3b66d21f-3baa-4a60-a1d9-f14a66c04af1	clean_water					uuid:3b66d21f-3baa-4a60-a1d9-f14a66c04af1
uuid:3b965b7e-4b06-4dd1-8455-b924ecd12456	yes	no	1	yes	yes	2813	ef		male	na	No	post	yes	post	2	25	Yes	18_29	yes	yes	999	no	close	yes	uuid:3b965b7e-4b06-4dd1-8455-b924ecd12456	dk					uuid:3b965b7e-4b06-4dd1-8455-b924ecd12456	na					uuid:3b965b7e-4b06-4dd1-8455-b924ecd12456	na_already_convinced					uuid:3b965b7e-4b06-4dd1-8455-b924ecd12456	iftreat					uuid:3b965b7e-4b06-4dd1-8455-b924ecd12456
uuid:3be19f57-1793-4d58-b724-6567842e8624	yes	no	4	yes	yes	260	C f		male	na	Some_secondary	post	yes	post	1	40	Yes	40_49	yes	yes	999	no	close	yes	uuid:3be19f57-1793-4d58-b724-6567842e8624	pregnant					uuid:3be19f57-1793-4d58-b724-6567842e8624	na					uuid:3be19f57-1793-4d58-b724-6567842e8624	help_me					uuid:3be19f57-1793-4d58-b724-6567842e8624	n/a					uuid:3be19f57-1793-4d58-b724-6567842e8624
uuid:3bed3d3f-ba7c-446d-9e84-0696b3157d22	yes	no	1	yes	yes	586	Ss		female	na	No	post	no	post	0	999	Yes	80_89	yes	yes	999	no	close	yes	uuid:3bed3d3f-ba7c-446d-9e84-0696b3157d22	dk					uuid:3bed3d3f-ba7c-446d-9e84-0696b3157d22	na					uuid:3bed3d3f-ba7c-446d-9e84-0696b3157d22	na_already_convinced					uuid:3bed3d3f-ba7c-446d-9e84-0696b3157d22	unknown					uuid:3bed3d3f-ba7c-446d-9e84-0696b3157d22
uuid:3c05a6c3-93e1-4f23-b431-1db8741b0928	yes	no	2	yes	yes	85	sp		female	na	No	post	yes	post	3	38	Yes	30_39	yes	yes	999	yes	close	yes	uuid:3c05a6c3-93e1-4f23-b431-1db8741b0928	dk					uuid:3c05a6c3-93e1-4f23-b431-1db8741b0928	action					uuid:3c05a6c3-93e1-4f23-b431-1db8741b0928	uk					uuid:3c05a6c3-93e1-4f23-b431-1db8741b0928	unknown					uuid:3c05a6c3-93e1-4f23-b431-1db8741b0928
uuid:3c191a77-eb6c-4883-ab58-c4d2a667ecc9	yes	no	5	yes	yes	242	Ld		female	dk	Primary	post	yes	post	2	35	Yes	30_39	yes	yes	999	no	close	yes	uuid:3c191a77-eb6c-4883-ab58-c4d2a667ecc9	dk					uuid:3c191a77-eb6c-4883-ab58-c4d2a667ecc9	na					uuid:3c191a77-eb6c-4883-ab58-c4d2a667ecc9	help_me					uuid:3c191a77-eb6c-4883-ab58-c4d2a667ecc9	n/a					uuid:3c191a77-eb6c-4883-ab58-c4d2a667ecc9
uuid:3c424e1b-c0f8-4420-a1d4-23f3e5b596df	yes	no	1	yes	yes	16	Dt	Li te okipe li vini kounya...	male	na	Primary	post	yes	post	1	22	Yes	18_29	yes	yes	999	no	close	yes	uuid:3c424e1b-c0f8-4420-a1d4-23f3e5b596df	pregnant					uuid:3c424e1b-c0f8-4420-a1d4-23f3e5b596df	na					uuid:3c424e1b-c0f8-4420-a1d4-23f3e5b596df	na_already_convinced					uuid:3c424e1b-c0f8-4420-a1d4-23f3e5b596df	iftreat					uuid:3c424e1b-c0f8-4420-a1d4-23f3e5b596df
uuid:3c80127e-7b84-4bba-a72c-1a8b82eec1dc	yes	no	2	yes	yes	2753	ll		female	na	No	post	yes	post	3	37	Yes	30_39	yes	yes	999	yes	close	yes	uuid:3c80127e-7b84-4bba-a72c-1a8b82eec1dc	pregnant					uuid:3c80127e-7b84-4bba-a72c-1a8b82eec1dc	dk					uuid:3c80127e-7b84-4bba-a72c-1a8b82eec1dc	uk					uuid:3c80127e-7b84-4bba-a72c-1a8b82eec1dc	unknown					uuid:3c80127e-7b84-4bba-a72c-1a8b82eec1dc
uuid:3cb8aca7-4be6-4910-83ff-dbf0b9efdd8b	yes	no	2	yes	yes	560	ca		male	na	Some_secondary	post	yes	post	2	20	Yes	18_29	yes	yes	999	no	close	yes	uuid:3cb8aca7-4be6-4910-83ff-dbf0b9efdd8b	pregnant					uuid:3cb8aca7-4be6-4910-83ff-dbf0b9efdd8b	na					uuid:3cb8aca7-4be6-4910-83ff-dbf0b9efdd8b	na_already_convinced					uuid:3cb8aca7-4be6-4910-83ff-dbf0b9efdd8b	clean_water					uuid:3cb8aca7-4be6-4910-83ff-dbf0b9efdd8b
uuid:3cd3f0ae-4357-4f69-9520-fed11a54af7a	yes	no	5	yes	yes	2662	Hm		female	na	No	post	yes	post	3	22	Yes	18_29	yes	yes	999	no	not_too_far	yes	uuid:3cd3f0ae-4357-4f69-9520-fed11a54af7a	pregnant					uuid:3cd3f0ae-4357-4f69-9520-fed11a54af7a	na					uuid:3cd3f0ae-4357-4f69-9520-fed11a54af7a	help_me					uuid:3cd3f0ae-4357-4f69-9520-fed11a54af7a	clean_water					uuid:3cd3f0ae-4357-4f69-9520-fed11a54af7a
uuid:3cdcd520-b4ff-44e3-9a9b-092aa0476b52	dk	dk	2	dk	na	921	jp		male	na	Primary	na	no	na	0	30	Yes	30_39	yes	na	999	na	dk	no	uuid:3cdcd520-b4ff-44e3-9a9b-092aa0476b52	dk					uuid:3cdcd520-b4ff-44e3-9a9b-092aa0476b52	na					uuid:3cdcd520-b4ff-44e3-9a9b-092aa0476b52	na_already_convinced					uuid:3cdcd520-b4ff-44e3-9a9b-092aa0476b52	clean_water					uuid:3cdcd520-b4ff-44e3-9a9b-092aa0476b52
uuid:3cfb6f4c-22ee-44fb-87b9-712d1e1ddeac	yes	no	2	yes	yes	87	de		male	na	Primary	post	yes	post	3	45	Yes	40_49	yes	yes	999	no	close	yes	uuid:3cfb6f4c-22ee-44fb-87b9-712d1e1ddeac	pregnant					uuid:3cfb6f4c-22ee-44fb-87b9-712d1e1ddeac	na					uuid:3cfb6f4c-22ee-44fb-87b9-712d1e1ddeac	uk					uuid:3cfb6f4c-22ee-44fb-87b9-712d1e1ddeac	clean_water					uuid:3cfb6f4c-22ee-44fb-87b9-712d1e1ddeac
uuid:3d12a649-9815-47e9-b30e-882188aac473	yes	no	1	yes	yes	26	Bm		male	na	Some_secondary	post	yes	post	1	38	Yes	30_39	yes	yes	999	yes	close	yes	uuid:3d12a649-9815-47e9-b30e-882188aac473	pregnant					uuid:3d12a649-9815-47e9-b30e-882188aac473	dk					uuid:3d12a649-9815-47e9-b30e-882188aac473	na_already_convinced					uuid:3d12a649-9815-47e9-b30e-882188aac473	clean_water					uuid:3d12a649-9815-47e9-b30e-882188aac473
uuid:3d15d353-0dc5-4649-97f3-21a34ece837d	yes	no	3	yes	yes	108	Se	Vthd	male	1	No	post	no	post	2	60	DK	60_69	no	yes	999	no	close	yes	uuid:3d15d353-0dc5-4649-97f3-21a34ece837d	dk					uuid:3d15d353-0dc5-4649-97f3-21a34ece837d	na					uuid:3d15d353-0dc5-4649-97f3-21a34ece837d	help_me					uuid:3d15d353-0dc5-4649-97f3-21a34ece837d	n/a					uuid:3d15d353-0dc5-4649-97f3-21a34ece837d
uuid:3d1db911-7fd4-4385-b000-af198e92a9ff	yes	no	3	yes	yes	108	Sd	Hdjf	female	1	Finish_primary	post	no	post	2	24	Yes	18_29	yes	yes	999	no	not_too_far	yes	uuid:3d1db911-7fd4-4385-b000-af198e92a9ff	pregnant					uuid:3d1db911-7fd4-4385-b000-af198e92a9ff	na					uuid:3d1db911-7fd4-4385-b000-af198e92a9ff	help_family					uuid:3d1db911-7fd4-4385-b000-af198e92a9ff	iftreat					uuid:3d1db911-7fd4-4385-b000-af198e92a9ff
uuid:3d3a330a-580a-4934-9894-e2491c811ca3	yes	no	4	dk	dk	2498	D.j	Ugr	male	na	Primary	home	no	post	1	27	DK	18_29	yes	yes	999	no	close	yes	uuid:3d3a330a-580a-4934-9894-e2491c811ca3	dk					uuid:3d3a330a-580a-4934-9894-e2491c811ca3	na					uuid:3d3a330a-580a-4934-9894-e2491c811ca3	uk					uuid:3d3a330a-580a-4934-9894-e2491c811ca3	unknown					uuid:3d3a330a-580a-4934-9894-e2491c811ca3
uuid:3d6ceb7a-bc7e-4be8-8568-1a7a5eaf1ec5	yes	no	5	yes	yes	224	Mp		female	na	No	post	yes	post	2	55	Yes	50_59	no	yes	999	no	not_too_far	yes	uuid:3d6ceb7a-bc7e-4be8-8568-1a7a5eaf1ec5	dk					uuid:3d6ceb7a-bc7e-4be8-8568-1a7a5eaf1ec5	na					uuid:3d6ceb7a-bc7e-4be8-8568-1a7a5eaf1ec5	uk					uuid:3d6ceb7a-bc7e-4be8-8568-1a7a5eaf1ec5	n/a					uuid:3d6ceb7a-bc7e-4be8-8568-1a7a5eaf1ec5
uuid:3d91734c-044e-4945-b3d0-79b15e94e5e4	yes	no	3	yes	yes	722	Ag	Bfh	female	1	Primary	post	yes	post	3	40	No	40_49	yes	yes	999	no	close	yes	uuid:3d91734c-044e-4945-b3d0-79b15e94e5e4	dk					uuid:3d91734c-044e-4945-b3d0-79b15e94e5e4	dk					uuid:3d91734c-044e-4945-b3d0-79b15e94e5e4	help_family					uuid:3d91734c-044e-4945-b3d0-79b15e94e5e4	other					uuid:3d91734c-044e-4945-b3d0-79b15e94e5e4
uuid:3dc1dafb-9d3b-477a-9513-1f74a4cc2149	yes	no	5	yes	yes	2713	Ic		female	na	Primary	post	yes	post	3	30	Yes	30_39	yes	yes	999	no	close	yes	uuid:3dc1dafb-9d3b-477a-9513-1f74a4cc2149	pregnant					uuid:3dc1dafb-9d3b-477a-9513-1f74a4cc2149	na					uuid:3dc1dafb-9d3b-477a-9513-1f74a4cc2149	help_me					uuid:3dc1dafb-9d3b-477a-9513-1f74a4cc2149	clean_water					uuid:3dc1dafb-9d3b-477a-9513-1f74a4cc2149
uuid:3dd1d91d-4d12-4deb-b3df-9fa7143f7af2	yes	no	1	yes	yes	2621	Il		female	na	Some_secondary	school	yes	school	3	19	Yes	18_29	yes	yes	5	yes	na_not_aware_post	yes	uuid:3dd1d91d-4d12-4deb-b3df-9fa7143f7af2	pregnant					uuid:3dd1d91d-4d12-4deb-b3df-9fa7143f7af2	dk					uuid:3dd1d91d-4d12-4deb-b3df-9fa7143f7af2	na_already_convinced					uuid:3dd1d91d-4d12-4deb-b3df-9fa7143f7af2	clean_water					uuid:3dd1d91d-4d12-4deb-b3df-9fa7143f7af2
uuid:3ddbbf66-aeb4-4e10-9c8c-82197bdf1ea6	yes	no	2	yes	yes	906	pp		female	na	No	post	yes	post	2	52	Yes	50_59	yes	yes	999	yes	close	yes	uuid:3ddbbf66-aeb4-4e10-9c8c-82197bdf1ea6	dk					uuid:3ddbbf66-aeb4-4e10-9c8c-82197bdf1ea6	dk					uuid:3ddbbf66-aeb4-4e10-9c8c-82197bdf1ea6	na_already_convinced					uuid:3ddbbf66-aeb4-4e10-9c8c-82197bdf1ea6	unknown					uuid:3ddbbf66-aeb4-4e10-9c8c-82197bdf1ea6
uuid:3e4659d7-2d0c-45ce-9823-99f08cef4da3	yes	dk	4	dk	no	352	Al	Ok	female	na	No	post	yes	post	2	57	Yes	50_59	yes	yes	999	yes	not_too_far	yes	uuid:3e4659d7-2d0c-45ce-9823-99f08cef4da3	dk					uuid:3e4659d7-2d0c-45ce-9823-99f08cef4da3	dk					uuid:3e4659d7-2d0c-45ce-9823-99f08cef4da3	help_me					uuid:3e4659d7-2d0c-45ce-9823-99f08cef4da3	iftreat					uuid:3e4659d7-2d0c-45ce-9823-99f08cef4da3
uuid:3eb92651-ae98-457f-8637-a5b81c02b982	yes	no	5	yes	yes	237	Jm		female	1	Some_secondary	post	yes	post	1	25	Yes	18_29	yes	yes	999	no	close	yes	uuid:3eb92651-ae98-457f-8637-a5b81c02b982	pregnant					uuid:3eb92651-ae98-457f-8637-a5b81c02b982	na					uuid:3eb92651-ae98-457f-8637-a5b81c02b982	help_me					uuid:3eb92651-ae98-457f-8637-a5b81c02b982	bednets					uuid:3eb92651-ae98-457f-8637-a5b81c02b982
uuid:3ec580a4-daf2-463a-b333-f4d0073153aa	yes	no	1	yes	yes	2611	Om		female	na	Some_secondary	home	yes	post	1	20	Yes	18_29	yes	yes	999	no	not_too_far	yes	uuid:3ec580a4-daf2-463a-b333-f4d0073153aa	pregnant					uuid:3ec580a4-daf2-463a-b333-f4d0073153aa	na					uuid:3ec580a4-daf2-463a-b333-f4d0073153aa	na_already_convinced					uuid:3ec580a4-daf2-463a-b333-f4d0073153aa	clean_water					uuid:3ec580a4-daf2-463a-b333-f4d0073153aa
uuid:3ed959d4-ab4f-47d9-8b2c-313577738a92	dk	dk	3	dk	dk	141	Jp	Gfjf	female	dk	Primary	home	yes	post	3	19	Yes	18_29	yes	yes	999	no	dk	yes	uuid:3ed959d4-ab4f-47d9-8b2c-313577738a92	pregnant					uuid:3ed959d4-ab4f-47d9-8b2c-313577738a92	na					uuid:3ed959d4-ab4f-47d9-8b2c-313577738a92	side_effect					uuid:3ed959d4-ab4f-47d9-8b2c-313577738a92	iftreat					uuid:3ed959d4-ab4f-47d9-8b2c-313577738a92
uuid:3eecbd16-f884-4b98-82fe-5383e1ad91b0	yes	no	4	yes	yes	163	D b		female	na	Some_secondary	post	yes	post	1	28	Yes	18_29	yes	yes	999	no	close	yes	uuid:3eecbd16-f884-4b98-82fe-5383e1ad91b0	pregnant					uuid:3eecbd16-f884-4b98-82fe-5383e1ad91b0	na					uuid:3eecbd16-f884-4b98-82fe-5383e1ad91b0	help_me					uuid:3eecbd16-f884-4b98-82fe-5383e1ad91b0	clean_water					uuid:3eecbd16-f884-4b98-82fe-5383e1ad91b0
uuid:3f078aef-4db8-438d-83fa-d6315a491d92	yes	yes	2	yes	yes	331	cn		female	2	Some_secondary	post	yes	post	2	32	Yes	30_39	yes	yes	999	yes	close	yes	uuid:3f078aef-4db8-438d-83fa-d6315a491d92	pregnant					uuid:3f078aef-4db8-438d-83fa-d6315a491d92	dk					uuid:3f078aef-4db8-438d-83fa-d6315a491d92	uk					uuid:3f078aef-4db8-438d-83fa-d6315a491d92	unknown					uuid:3f078aef-4db8-438d-83fa-d6315a491d92
uuid:3f2f7d1f-04da-4268-b93b-137ad790eea2	yes	no	2	yes	yes	2845	iv		female	na	Primary	post	yes	post	3	30	Yes	30_39	yes	yes	999	yes	not_too_far	yes	uuid:3f2f7d1f-04da-4268-b93b-137ad790eea2	pregnant					uuid:3f2f7d1f-04da-4268-b93b-137ad790eea2	action					uuid:3f2f7d1f-04da-4268-b93b-137ad790eea2	na_already_convinced					uuid:3f2f7d1f-04da-4268-b93b-137ad790eea2	bednets					uuid:3f2f7d1f-04da-4268-b93b-137ad790eea2
uuid:3f339c14-ef87-4dcd-aa70-96c5f0251caf	yes	no	2	yes	yes	76	ct		male	na	Primary	post	yes	post	3	38	Yes	30_39	yes	yes	999	yes	close	yes	uuid:3f339c14-ef87-4dcd-aa70-96c5f0251caf	pregnant					uuid:3f339c14-ef87-4dcd-aa70-96c5f0251caf	not_eat					uuid:3f339c14-ef87-4dcd-aa70-96c5f0251caf	uk					uuid:3f339c14-ef87-4dcd-aa70-96c5f0251caf	unknown					uuid:3f339c14-ef87-4dcd-aa70-96c5f0251caf
uuid:3f6a59e9-d081-4d0b-95d9-570b693f967b	yes	no	3	yes	yes	127	Wc	Gdud	male	1	Finish_primary	post	no	post	2	27	Yes	18_29	yes	yes	999	no	close	yes	uuid:3f6a59e9-d081-4d0b-95d9-570b693f967b	pregnant					uuid:3f6a59e9-d081-4d0b-95d9-570b693f967b	na					uuid:3f6a59e9-d081-4d0b-95d9-570b693f967b	side_effect					uuid:3f6a59e9-d081-4d0b-95d9-570b693f967b	unknown					uuid:3f6a59e9-d081-4d0b-95d9-570b693f967b
uuid:3fa1197f-a14d-49bd-8032-2979f8167056	yes	no	2	yes	yes	961	ms		female	na	No	post	yes	post	1	20	Yes	18_29	yes	yes	999	no	not_too_far	yes	uuid:3fa1197f-a14d-49bd-8032-2979f8167056	dk					uuid:3fa1197f-a14d-49bd-8032-2979f8167056	na					uuid:3fa1197f-a14d-49bd-8032-2979f8167056	na_already_convinced					uuid:3fa1197f-a14d-49bd-8032-2979f8167056	unknown					uuid:3fa1197f-a14d-49bd-8032-2979f8167056
uuid:3fb1c673-e5bb-4e7b-adf9-a2091aeb4989	yes	no	1	yes	yes	269	Lp		female	na	No	post	yes	post	2	43	Yes	40_49	yes	yes	999	yes	close	yes	uuid:3fb1c673-e5bb-4e7b-adf9-a2091aeb4989	pregnant					uuid:3fb1c673-e5bb-4e7b-adf9-a2091aeb4989	action					uuid:3fb1c673-e5bb-4e7b-adf9-a2091aeb4989	na_already_convinced					uuid:3fb1c673-e5bb-4e7b-adf9-a2091aeb4989	iftreat					uuid:3fb1c673-e5bb-4e7b-adf9-a2091aeb4989
uuid:400d8c4e-3694-4df0-b640-4480d31ab719	na_not_aware_of_post	dk	3	yes	na	135	Ja	Li pat jwenn li	female	na	Primary	na	no	na	0	22	No	18_29	no	na	999	na	dk	no	uuid:400d8c4e-3694-4df0-b640-4480d31ab719	dk					uuid:400d8c4e-3694-4df0-b640-4480d31ab719	na					uuid:400d8c4e-3694-4df0-b640-4480d31ab719	help_family					uuid:400d8c4e-3694-4df0-b640-4480d31ab719	n/a					uuid:400d8c4e-3694-4df0-b640-4480d31ab719
uuid:401547a1-f6c0-444f-abd5-3e1f760208d0	na_not_aware_of_post	no	4	dk	dk	2499	Cp	Gfs	female	na	No	na	no	na	999	50	No	50_59	yes	no	999	na	na_not_aware_post	no	uuid:401547a1-f6c0-444f-abd5-3e1f760208d0	dk					uuid:401547a1-f6c0-444f-abd5-3e1f760208d0	na					uuid:401547a1-f6c0-444f-abd5-3e1f760208d0	help_family					uuid:401547a1-f6c0-444f-abd5-3e1f760208d0	unknown					uuid:401547a1-f6c0-444f-abd5-3e1f760208d0
uuid:40185f7d-d761-4195-9257-5da0b2e23c45	yes	dk	4	yes	yes	2567	Wt	Oy	female	na	Primary	na	yes	post	2	32	Yes	30_39	yes	yes	999	yes	not_too_far	no	uuid:40185f7d-d761-4195-9257-5da0b2e23c45	pregnant					uuid:40185f7d-d761-4195-9257-5da0b2e23c45	not_eat					uuid:40185f7d-d761-4195-9257-5da0b2e23c45	help_me					uuid:40185f7d-d761-4195-9257-5da0b2e23c45	clean_water					uuid:40185f7d-d761-4195-9257-5da0b2e23c45
uuid:402f9df1-6f1a-42e2-8684-583851cc55cd	yes	no	2	yes	yes	925	df		male	na	No	post	yes	post	1	81	Yes	80_89	yes	yes	999	no	close	yes	uuid:402f9df1-6f1a-42e2-8684-583851cc55cd	dk					uuid:402f9df1-6f1a-42e2-8684-583851cc55cd	na					uuid:402f9df1-6f1a-42e2-8684-583851cc55cd	na_already_convinced					uuid:402f9df1-6f1a-42e2-8684-583851cc55cd	unknown					uuid:402f9df1-6f1a-42e2-8684-583851cc55cd
uuid:404bd59f-c6ad-4615-94d7-cf7e6e1c8b12	yes	no	2	yes	yes	82	fj		female	na	No	post	yes	post	2	62	Yes	60_69	yes	yes	999	no	close	yes	uuid:404bd59f-c6ad-4615-94d7-cf7e6e1c8b12	dk					uuid:404bd59f-c6ad-4615-94d7-cf7e6e1c8b12	na					uuid:404bd59f-c6ad-4615-94d7-cf7e6e1c8b12	uk					uuid:404bd59f-c6ad-4615-94d7-cf7e6e1c8b12	unknown					uuid:404bd59f-c6ad-4615-94d7-cf7e6e1c8b12
uuid:40c03231-06ee-4c26-9581-b9816fa4b9a9	yes	no	1	yes	yes	2662	Sf		female	na	Some_secondary	post	no	post	0	28	Yes	18_29	yes	yes	999	yes	close	yes	uuid:40c03231-06ee-4c26-9581-b9816fa4b9a9	pregnant					uuid:40c03231-06ee-4c26-9581-b9816fa4b9a9	action					uuid:40c03231-06ee-4c26-9581-b9816fa4b9a9	na_already_convinced					uuid:40c03231-06ee-4c26-9581-b9816fa4b9a9	unknown					uuid:40c03231-06ee-4c26-9581-b9816fa4b9a9
uuid:40d9d7db-853a-4489-8c9d-c5d7afa83423	yes	no	2	yes	yes	325	ac		female	na	Primary	post	yes	post	3	33	Yes	30_39	yes	yes	999	yes	not_too_far	yes	uuid:40d9d7db-853a-4489-8c9d-c5d7afa83423	pregnant					uuid:40d9d7db-853a-4489-8c9d-c5d7afa83423	dk					uuid:40d9d7db-853a-4489-8c9d-c5d7afa83423	uk					uuid:40d9d7db-853a-4489-8c9d-c5d7afa83423	clean_water					uuid:40d9d7db-853a-4489-8c9d-c5d7afa83423
uuid:40ecd9b2-db3c-440e-92df-f08a2147a163	yes	no	5	yes	yes	2672	Lr		female	na	Some_secondary	school	yes	school	3	18	Yes	18_29	yes	yes	999	no	other	yes	uuid:40ecd9b2-db3c-440e-92df-f08a2147a163	pregnant					uuid:40ecd9b2-db3c-440e-92df-f08a2147a163	na					uuid:40ecd9b2-db3c-440e-92df-f08a2147a163	na_already_convinced					uuid:40ecd9b2-db3c-440e-92df-f08a2147a163	bednets					uuid:40ecd9b2-db3c-440e-92df-f08a2147a163
uuid:4119eed6-42da-450a-a0e3-27bfe51c1fc7	yes	no	1	yes	yes	27	Mmb		female	na	Finish_primary	post	yes	post	2	29	Yes	18_29	yes	yes	999	no	close	yes	uuid:4119eed6-42da-450a-a0e3-27bfe51c1fc7	pregnant					uuid:4119eed6-42da-450a-a0e3-27bfe51c1fc7	na					uuid:4119eed6-42da-450a-a0e3-27bfe51c1fc7	na_already_convinced					uuid:4119eed6-42da-450a-a0e3-27bfe51c1fc7	clean_water					uuid:4119eed6-42da-450a-a0e3-27bfe51c1fc7
uuid:411f2af0-12f6-4f6f-8af8-c1f898bd2c04	yes	no	4	yes	yes	161	C p		female	na	Primary	post	yes	post	1	19	Yes	18_29	yes	yes	999	no	close	yes	uuid:411f2af0-12f6-4f6f-8af8-c1f898bd2c04	pregnant					uuid:411f2af0-12f6-4f6f-8af8-c1f898bd2c04	na					uuid:411f2af0-12f6-4f6f-8af8-c1f898bd2c04	help_me					uuid:411f2af0-12f6-4f6f-8af8-c1f898bd2c04	unknown					uuid:411f2af0-12f6-4f6f-8af8-c1f898bd2c04
uuid:41575d50-e19f-450a-997a-ba7e7b5359ef	yes	no	1	yes	yes	2608	Se		female	na	No	post	yes	post	2	70	Yes	70_79	yes	yes	999	no	close	yes	uuid:41575d50-e19f-450a-997a-ba7e7b5359ef	dk					uuid:41575d50-e19f-450a-997a-ba7e7b5359ef	na					uuid:41575d50-e19f-450a-997a-ba7e7b5359ef	na_already_convinced					uuid:41575d50-e19f-450a-997a-ba7e7b5359ef	iftreat					uuid:41575d50-e19f-450a-997a-ba7e7b5359ef
uuid:415a4ecb-0534-48c8-bd87-a637e92937a9	yes	no	5	yes	yes	222	Ve		female	na	Primary	post	yes	post	1	30	Yes	30_39	yes	yes	999	no	not_too_far	yes	uuid:415a4ecb-0534-48c8-bd87-a637e92937a9	pregnant					uuid:415a4ecb-0534-48c8-bd87-a637e92937a9	na					uuid:415a4ecb-0534-48c8-bd87-a637e92937a9	side_effect					uuid:415a4ecb-0534-48c8-bd87-a637e92937a9	bednets					uuid:415a4ecb-0534-48c8-bd87-a637e92937a9
uuid:415c1f16-7fc8-4b86-adbd-db73f0c2812a	yes	no	1	dk	yes	261	Lm		female	na	Primary	post	yes	post	1	61	Yes	60_69	yes	yes	999	no	not_too_far	yes	uuid:415c1f16-7fc8-4b86-adbd-db73f0c2812a	pregnant					uuid:415c1f16-7fc8-4b86-adbd-db73f0c2812a	na					uuid:415c1f16-7fc8-4b86-adbd-db73f0c2812a	na_already_convinced					uuid:415c1f16-7fc8-4b86-adbd-db73f0c2812a	clean_water					uuid:415c1f16-7fc8-4b86-adbd-db73f0c2812a
uuid:41739144-907a-4667-a755-3a1eff1155f6	yes	no	5	yes	yes	224	S o		female	na	No	post	no	post	999	61	Yes	60_69	no	yes	999	no	not_too_far	yes	uuid:41739144-907a-4667-a755-3a1eff1155f6	pregnant					uuid:41739144-907a-4667-a755-3a1eff1155f6	na					uuid:41739144-907a-4667-a755-3a1eff1155f6	uk					uuid:41739144-907a-4667-a755-3a1eff1155f6	n/a					uuid:41739144-907a-4667-a755-3a1eff1155f6
uuid:41b13a71-2101-4eba-ac5d-0a8cf27826d1	dk	no	4	yes	na	188	R d		female	na	Finish_primary	na	no	na	999	28	Yes	18_29	yes	na	999	na	dk	no	uuid:41b13a71-2101-4eba-ac5d-0a8cf27826d1	pregnant					uuid:41b13a71-2101-4eba-ac5d-0a8cf27826d1	na					uuid:41b13a71-2101-4eba-ac5d-0a8cf27826d1	help_me					uuid:41b13a71-2101-4eba-ac5d-0a8cf27826d1	unknown					uuid:41b13a71-2101-4eba-ac5d-0a8cf27826d1
uuid:41f10ad0-7e0c-4f0e-a61d-d9199f70cc70	yes	no	4	dk	dk	2497	L.f	Lidt	female	dk	No	home	yes	post	1	34	Yes	30_39	yes	yes	999	yes	not_too_far	yes	uuid:41f10ad0-7e0c-4f0e-a61d-d9199f70cc70	Children_under_3					uuid:41f10ad0-7e0c-4f0e-a61d-d9199f70cc70	action					uuid:41f10ad0-7e0c-4f0e-a61d-d9199f70cc70	na_already_convinced					uuid:41f10ad0-7e0c-4f0e-a61d-d9199f70cc70	unknown					uuid:41f10ad0-7e0c-4f0e-a61d-d9199f70cc70
uuid:420def9f-f16e-46db-aa50-66592d5572ba	no	no	1	yes	na	586	Tc		male	na	No	na	yes	na	1	86	Yes	80_89	yes	no	999	na	far	no	uuid:420def9f-f16e-46db-aa50-66592d5572ba	dk					uuid:420def9f-f16e-46db-aa50-66592d5572ba	na					uuid:420def9f-f16e-46db-aa50-66592d5572ba	side_effect					uuid:420def9f-f16e-46db-aa50-66592d5572ba	unknown					uuid:420def9f-f16e-46db-aa50-66592d5572ba
uuid:421572a5-14ba-4b4f-9adb-6f093c437e7e	yes	no	2	yes	yes	263	ic		female	na	No	post	yes	post	2	75	Yes	70_79	yes	yes	999	yes	close	yes	uuid:421572a5-14ba-4b4f-9adb-6f093c437e7e	dk					uuid:421572a5-14ba-4b4f-9adb-6f093c437e7e	dk					uuid:421572a5-14ba-4b4f-9adb-6f093c437e7e	uk					uuid:421572a5-14ba-4b4f-9adb-6f093c437e7e	unknown					uuid:421572a5-14ba-4b4f-9adb-6f093c437e7e
uuid:4226c9a3-8cce-4ad7-8f25-0b94be1a6393	yes	no	3	yes	yes	101	La	Vdu	male	1	No	post	yes	post	3	49	Yes	40_49	yes	yes	999	no	not_too_far	yes	uuid:4226c9a3-8cce-4ad7-8f25-0b94be1a6393	dk					uuid:4226c9a3-8cce-4ad7-8f25-0b94be1a6393	na					uuid:4226c9a3-8cce-4ad7-8f25-0b94be1a6393	side_effect					uuid:4226c9a3-8cce-4ad7-8f25-0b94be1a6393	unknown					uuid:4226c9a3-8cce-4ad7-8f25-0b94be1a6393
uuid:426a0e6a-185b-42cc-90da-788ffb633317	yes	no	5	yes	yes	1010	Jk		female	na	No	post	yes	post	2	63	Yes	60_69	no	yes	999	no	not_too_far	yes	uuid:426a0e6a-185b-42cc-90da-788ffb633317	dk					uuid:426a0e6a-185b-42cc-90da-788ffb633317	na					uuid:426a0e6a-185b-42cc-90da-788ffb633317	uk					uuid:426a0e6a-185b-42cc-90da-788ffb633317	n/a					uuid:426a0e6a-185b-42cc-90da-788ffb633317
uuid:42a1a688-4509-42ed-80e3-daa1156b33a1	dk	dk	2	yes	na	315	mj		female	na	Some_secondary	na	yes	na	2	18	Yes	18_29	yes	na	999	na	dk	no	uuid:42a1a688-4509-42ed-80e3-daa1156b33a1	pregnant					uuid:42a1a688-4509-42ed-80e3-daa1156b33a1	na					uuid:42a1a688-4509-42ed-80e3-daa1156b33a1	uk					uuid:42a1a688-4509-42ed-80e3-daa1156b33a1	unknown					uuid:42a1a688-4509-42ed-80e3-daa1156b33a1
uuid:42ebcc91-7b03-4a0a-867c-0d65920d52c9	yes	no	4	dk	yes	190	A p		female	na	Some_secondary	school	yes	school	1	23	Yes	18_29	yes	yes	999	no	not_too_far	yes	uuid:42ebcc91-7b03-4a0a-867c-0d65920d52c9	dk					uuid:42ebcc91-7b03-4a0a-867c-0d65920d52c9	na					uuid:42ebcc91-7b03-4a0a-867c-0d65920d52c9	help_me					uuid:42ebcc91-7b03-4a0a-867c-0d65920d52c9	unknown					uuid:42ebcc91-7b03-4a0a-867c-0d65920d52c9
uuid:432fc60b-8282-45dd-bbeb-3fc7f333a027	yes	no	1	yes	yes	47	Rc		female	na	No	post	dk	post	999	65	Yes	60_69	yes	yes	999	no	not_too_far	yes	uuid:432fc60b-8282-45dd-bbeb-3fc7f333a027	pregnant					uuid:432fc60b-8282-45dd-bbeb-3fc7f333a027	na					uuid:432fc60b-8282-45dd-bbeb-3fc7f333a027	na_already_convinced					uuid:432fc60b-8282-45dd-bbeb-3fc7f333a027	clean_water					uuid:432fc60b-8282-45dd-bbeb-3fc7f333a027
uuid:433e51b5-3f2d-4d3f-b402-4ad6be2e59cb	yes	no	1	yes	yes	2812	jf		female	na	Primary	post	no	post	0	18	Yes	18_29	yes	yes	999	no	close	yes	uuid:433e51b5-3f2d-4d3f-b402-4ad6be2e59cb	pregnant					uuid:433e51b5-3f2d-4d3f-b402-4ad6be2e59cb	na					uuid:433e51b5-3f2d-4d3f-b402-4ad6be2e59cb	na_already_convinced					uuid:433e51b5-3f2d-4d3f-b402-4ad6be2e59cb	iftreat					uuid:433e51b5-3f2d-4d3f-b402-4ad6be2e59cb
uuid:434d4eb7-141e-4103-8b35-875706414301	yes	no	2	yes	yes	331	ml		male	na	University	post	yes	post	3	40	Yes	40_49	yes	yes	1	no	close	yes	uuid:434d4eb7-141e-4103-8b35-875706414301	pregnant					uuid:434d4eb7-141e-4103-8b35-875706414301	na					uuid:434d4eb7-141e-4103-8b35-875706414301	uk					uuid:434d4eb7-141e-4103-8b35-875706414301	clean_water					uuid:434d4eb7-141e-4103-8b35-875706414301
uuid:435298ba-39da-41b9-b855-a2b0442c220d	yes	no	1	yes	yes	2656	Wp		male	na	Finish_primary	post	yes	post	2	44	Yes	40_49	yes	yes	999	no	close	yes	uuid:435298ba-39da-41b9-b855-a2b0442c220d	pregnant					uuid:435298ba-39da-41b9-b855-a2b0442c220d	na					uuid:435298ba-39da-41b9-b855-a2b0442c220d	na_already_convinced					uuid:435298ba-39da-41b9-b855-a2b0442c220d	clean_water					uuid:435298ba-39da-41b9-b855-a2b0442c220d
uuid:43616de4-f867-4c3c-ace1-e65122e1a637	yes	no	3	yes	yes	161	ds	li te fe grenn li fel mal.	male	1	Finish_primary	post	no	post	2	26	Yes	18_29	yes	yes	999	yes	not_too_far	yes	uuid:43616de4-f867-4c3c-ace1-e65122e1a637	pregnant					uuid:43616de4-f867-4c3c-ace1-e65122e1a637	dk					uuid:43616de4-f867-4c3c-ace1-e65122e1a637	help_me					uuid:43616de4-f867-4c3c-ace1-e65122e1a637	clean_water					uuid:43616de4-f867-4c3c-ace1-e65122e1a637
uuid:437390d9-2d9e-4de5-b29b-dc69480dc620	yes	no	1	yes	yes	26	Ve		female	na	Finish_primary	post	yes	post	2	22	Yes	18_29	yes	yes	999	no	close	yes	uuid:437390d9-2d9e-4de5-b29b-dc69480dc620	pregnant					uuid:437390d9-2d9e-4de5-b29b-dc69480dc620	na					uuid:437390d9-2d9e-4de5-b29b-dc69480dc620	na_already_convinced					uuid:437390d9-2d9e-4de5-b29b-dc69480dc620	bednets					uuid:437390d9-2d9e-4de5-b29b-dc69480dc620
uuid:438577b0-d99c-4b5d-98bf-5feede74fd8c	yes	no	5	yes	yes	315	Dj		female	na	Some_secondary	post	yes	post	2	30	Yes	30_39	yes	yes	999	no	close	yes	uuid:438577b0-d99c-4b5d-98bf-5feede74fd8c	pregnant					uuid:438577b0-d99c-4b5d-98bf-5feede74fd8c	na					uuid:438577b0-d99c-4b5d-98bf-5feede74fd8c	help_me					uuid:438577b0-d99c-4b5d-98bf-5feede74fd8c	mosquito					uuid:438577b0-d99c-4b5d-98bf-5feede74fd8c
uuid:4389c692-00ca-4480-b677-fe559a184329	yes	no	1	yes	yes	2655	Mn		female	na	Some_secondary	post	no	post	0	22	Yes	18_29	yes	yes	999	no	close	yes	uuid:4389c692-00ca-4480-b677-fe559a184329	pregnant					uuid:4389c692-00ca-4480-b677-fe559a184329	na					uuid:4389c692-00ca-4480-b677-fe559a184329	na_already_convinced					uuid:4389c692-00ca-4480-b677-fe559a184329	iftreat					uuid:4389c692-00ca-4480-b677-fe559a184329
uuid:4397c922-8a43-4c66-b127-8908164ffcce	yes	no	5	yes	yes	1064	Lc		female	na	Finish_primary	post	yes	post	3	27	Yes	18_29	yes	yes	999	no	close	yes	uuid:4397c922-8a43-4c66-b127-8908164ffcce	pregnant					uuid:4397c922-8a43-4c66-b127-8908164ffcce	na					uuid:4397c922-8a43-4c66-b127-8908164ffcce	na_already_convinced					uuid:4397c922-8a43-4c66-b127-8908164ffcce	clean_water					uuid:4397c922-8a43-4c66-b127-8908164ffcce
uuid:43a0bebe-16a5-4308-9df9-1b8122a8f79e	yes	no	3	other	yes	625	Md	Bfjf	female	1	Finish_primary	home	no	post	2	34	Yes	30_39	yes	yes	999	no	not_too_far	yes	uuid:43a0bebe-16a5-4308-9df9-1b8122a8f79e	pregnant					uuid:43a0bebe-16a5-4308-9df9-1b8122a8f79e	na					uuid:43a0bebe-16a5-4308-9df9-1b8122a8f79e	help_me					uuid:43a0bebe-16a5-4308-9df9-1b8122a8f79e	unknown					uuid:43a0bebe-16a5-4308-9df9-1b8122a8f79e
uuid:43d413e4-f39b-4801-82ca-74452d4bd2c6	yes	no	2	yes	yes	2757	sg		male	na	No	post	yes	post	1	36	Yes	30_39	yes	yes	999	no	close	yes	uuid:43d413e4-f39b-4801-82ca-74452d4bd2c6	dk					uuid:43d413e4-f39b-4801-82ca-74452d4bd2c6	na					uuid:43d413e4-f39b-4801-82ca-74452d4bd2c6	uk					uuid:43d413e4-f39b-4801-82ca-74452d4bd2c6	unknown					uuid:43d413e4-f39b-4801-82ca-74452d4bd2c6
uuid:4402e0e9-559f-44a4-8e29-18565d8688e0	yes	no	3	yes	yes	128	Il	Hg	female	1	No	post	yes	post	3	58	Yes	50_59	yes	yes	999	no	not_too_far	yes	uuid:4402e0e9-559f-44a4-8e29-18565d8688e0	dk					uuid:4402e0e9-559f-44a4-8e29-18565d8688e0	na					uuid:4402e0e9-559f-44a4-8e29-18565d8688e0	side_effect					uuid:4402e0e9-559f-44a4-8e29-18565d8688e0	iftreat					uuid:4402e0e9-559f-44a4-8e29-18565d8688e0
uuid:44147cde-aed0-41d8-9be1-fee72885ed39	yes	no	1	yes	yes	45	Sab		male	na	Primary	post	yes	post	2	70	Yes	70_79	yes	yes	999	no	close	yes	uuid:44147cde-aed0-41d8-9be1-fee72885ed39	dk					uuid:44147cde-aed0-41d8-9be1-fee72885ed39	na					uuid:44147cde-aed0-41d8-9be1-fee72885ed39	na_already_convinced					uuid:44147cde-aed0-41d8-9be1-fee72885ed39	unknown					uuid:44147cde-aed0-41d8-9be1-fee72885ed39
uuid:444c92ef-f04f-4dd8-9946-2fb06d8cd58b	yes	no	4	yes	yes	2503	W.c	Yye	female	na	Some_secondary	post	yes	post	2	33	Yes	30_39	yes	yes	999	no	close	yes	uuid:444c92ef-f04f-4dd8-9946-2fb06d8cd58b	pregnant					uuid:444c92ef-f04f-4dd8-9946-2fb06d8cd58b	na					uuid:444c92ef-f04f-4dd8-9946-2fb06d8cd58b	na_already_convinced					uuid:444c92ef-f04f-4dd8-9946-2fb06d8cd58b	clean_water					uuid:444c92ef-f04f-4dd8-9946-2fb06d8cd58b
uuid:4486b09b-208d-48c2-9ba9-daec999c7c82	dk	dk	4	yes	na	156	J d		female	na	Some_secondary	na	yes	na	1	24	Yes	18_29	no	na	999	na	dk	no	uuid:4486b09b-208d-48c2-9ba9-daec999c7c82	pregnant					uuid:4486b09b-208d-48c2-9ba9-daec999c7c82	na					uuid:4486b09b-208d-48c2-9ba9-daec999c7c82	help_family					uuid:4486b09b-208d-48c2-9ba9-daec999c7c82	n/a					uuid:4486b09b-208d-48c2-9ba9-daec999c7c82
uuid:44dcfe44-c49f-4ec1-af40-2e9ad9bfec86	yes	no	1	yes	yes	2602	rm		female	na	No	post	yes	post	1	20	Yes	18_29	yes	yes	999	yes	not_too_far	yes	uuid:44dcfe44-c49f-4ec1-af40-2e9ad9bfec86	pregnant					uuid:44dcfe44-c49f-4ec1-af40-2e9ad9bfec86	action					uuid:44dcfe44-c49f-4ec1-af40-2e9ad9bfec86	na_already_convinced					uuid:44dcfe44-c49f-4ec1-af40-2e9ad9bfec86	iftreat					uuid:44dcfe44-c49f-4ec1-af40-2e9ad9bfec86
uuid:45179f3e-f1b8-49d5-a30c-257a83030825	yes	no	1	yes	yes	2626	mlt		female	na	Primary	post	yes	post	2	62	Yes	60_69	yes	yes	999	no	close	yes	uuid:45179f3e-f1b8-49d5-a30c-257a83030825	pregnant					uuid:45179f3e-f1b8-49d5-a30c-257a83030825	na					uuid:45179f3e-f1b8-49d5-a30c-257a83030825	na_already_convinced					uuid:45179f3e-f1b8-49d5-a30c-257a83030825	clean_water					uuid:45179f3e-f1b8-49d5-a30c-257a83030825
uuid:451de783-0d06-4d5e-b4b6-9470dd4671df	yes	no	3	yes	yes	114	Cl	Btjd	female	1	Finish_primary	home	yes	post	3	32	Yes	30_39	yes	yes	999	no	not_too_far	yes	uuid:451de783-0d06-4d5e-b4b6-9470dd4671df	pregnant					uuid:451de783-0d06-4d5e-b4b6-9470dd4671df	na					uuid:451de783-0d06-4d5e-b4b6-9470dd4671df	help_me					uuid:451de783-0d06-4d5e-b4b6-9470dd4671df	iftreat					uuid:451de783-0d06-4d5e-b4b6-9470dd4671df
uuid:45bc2047-81d1-4fc6-b892-4aef5b5f4ee6	yes	no	3	yes	yes	146	jj	bdc	female	1	Finish_primary	home	no	post	2	38	Yes	30_39	yes	yes	999	no	close	yes	uuid:45bc2047-81d1-4fc6-b892-4aef5b5f4ee6	pregnant					uuid:45bc2047-81d1-4fc6-b892-4aef5b5f4ee6	na					uuid:45bc2047-81d1-4fc6-b892-4aef5b5f4ee6	help_me					uuid:45bc2047-81d1-4fc6-b892-4aef5b5f4ee6	bednets					uuid:45bc2047-81d1-4fc6-b892-4aef5b5f4ee6
uuid:45d78fea-1065-4f56-9038-7db95122b30a	yes	no	1	yes	no	2636	Rj		female	na	Some_secondary	home	yes	post	1	42	Yes	40_49	yes	yes	999	no	close	yes	uuid:45d78fea-1065-4f56-9038-7db95122b30a	pregnant					uuid:45d78fea-1065-4f56-9038-7db95122b30a	na					uuid:45d78fea-1065-4f56-9038-7db95122b30a	na_already_convinced					uuid:45d78fea-1065-4f56-9038-7db95122b30a	iftreat					uuid:45d78fea-1065-4f56-9038-7db95122b30a
uuid:45e599cc-a8ad-416d-8196-076224035ab9	yes	no	1	yes	yes	14	Mn	U	female	na	Finish_primary	post	yes	post	1	34	Yes	30_39	yes	yes	999	no	not_too_far	yes	uuid:45e599cc-a8ad-416d-8196-076224035ab9	pregnant					uuid:45e599cc-a8ad-416d-8196-076224035ab9	na					uuid:45e599cc-a8ad-416d-8196-076224035ab9	na_already_convinced					uuid:45e599cc-a8ad-416d-8196-076224035ab9	clean_water					uuid:45e599cc-a8ad-416d-8196-076224035ab9
uuid:45e7ec4a-c447-42ba-b3cc-d65d5dfe475a	yes	no	2	yes	yes	2776	Ad		female	na	Primary	post	yes	post	2	57	Yes	50_59	yes	yes	999	no	close	yes	uuid:45e7ec4a-c447-42ba-b3cc-d65d5dfe475a	pregnant					uuid:45e7ec4a-c447-42ba-b3cc-d65d5dfe475a	na					uuid:45e7ec4a-c447-42ba-b3cc-d65d5dfe475a	help_me					uuid:45e7ec4a-c447-42ba-b3cc-d65d5dfe475a	clean_water					uuid:45e7ec4a-c447-42ba-b3cc-d65d5dfe475a
uuid:45f88ea9-ae13-4f27-b516-832fc8b0c5fd	yes	no	3	yes	yes	130	Rj	Ffh	female	1	No	home	no	post	2	54	Yes	50_59	yes	yes	999	no	not_too_far	yes	uuid:45f88ea9-ae13-4f27-b516-832fc8b0c5fd	pregnant					uuid:45f88ea9-ae13-4f27-b516-832fc8b0c5fd	na					uuid:45f88ea9-ae13-4f27-b516-832fc8b0c5fd	help_family					uuid:45f88ea9-ae13-4f27-b516-832fc8b0c5fd	other					uuid:45f88ea9-ae13-4f27-b516-832fc8b0c5fd
uuid:46158f6e-8582-4850-816b-c88fbdac9232	yes	no	5	yes	yes	291	Mp		female	na	Primary	post	yes	post	3	35	Yes	30_39	yes	yes	999	no	close	yes	uuid:46158f6e-8582-4850-816b-c88fbdac9232	pregnant					uuid:46158f6e-8582-4850-816b-c88fbdac9232	na					uuid:46158f6e-8582-4850-816b-c88fbdac9232	help_family					uuid:46158f6e-8582-4850-816b-c88fbdac9232	clean_water					uuid:46158f6e-8582-4850-816b-c88fbdac9232
uuid:4676ea37-3f34-422f-bcb8-735f42832ff4	yes	no	1	yes	na	579	Mng		female	na	No	home	yes	home	1	54	Yes	50_59	yes	yes	999	no	close	yes	uuid:4676ea37-3f34-422f-bcb8-735f42832ff4	pregnant					uuid:4676ea37-3f34-422f-bcb8-735f42832ff4	na					uuid:4676ea37-3f34-422f-bcb8-735f42832ff4	na_already_convinced					uuid:4676ea37-3f34-422f-bcb8-735f42832ff4	unknown					uuid:4676ea37-3f34-422f-bcb8-735f42832ff4
uuid:467e9bfb-3936-44ba-97ad-bd76212c75de	yes	no	4	yes	yes	206	J j		female	na	Primary	school	yes	school	1	18	Yes	18_29	yes	yes	999	no	far	yes	uuid:467e9bfb-3936-44ba-97ad-bd76212c75de	pregnant					uuid:467e9bfb-3936-44ba-97ad-bd76212c75de	na					uuid:467e9bfb-3936-44ba-97ad-bd76212c75de	help_me					uuid:467e9bfb-3936-44ba-97ad-bd76212c75de	mosquito					uuid:467e9bfb-3936-44ba-97ad-bd76212c75de
uuid:46ab6f69-2347-4d17-b71c-d7f97ad7bc81	yes	no	1	yes	yes	266	Ce		male	na	Finish_primary	post	yes	post	2	28	Yes	18_29	yes	yes	999	yes	close	yes	uuid:46ab6f69-2347-4d17-b71c-d7f97ad7bc81	pregnant					uuid:46ab6f69-2347-4d17-b71c-d7f97ad7bc81	not_eat					uuid:46ab6f69-2347-4d17-b71c-d7f97ad7bc81	na_already_convinced					uuid:46ab6f69-2347-4d17-b71c-d7f97ad7bc81	bednets					uuid:46ab6f69-2347-4d17-b71c-d7f97ad7bc81
uuid:46bc211b-d845-4884-a306-a024386bbe07	yes	no	1	yes	yes	2620	cl		female	na	Some_secondary	home	yes	post	1	18	Yes	18_29	yes	yes	999	yes	not_too_far	yes	uuid:46bc211b-d845-4884-a306-a024386bbe07	pregnant					uuid:46bc211b-d845-4884-a306-a024386bbe07	dk					uuid:46bc211b-d845-4884-a306-a024386bbe07	na_already_convinced					uuid:46bc211b-d845-4884-a306-a024386bbe07	unknown					uuid:46bc211b-d845-4884-a306-a024386bbe07
uuid:46be63f1-d73d-4fe5-9bd8-b3dbe5ede9ee	yes	no	4	yes	dk	213	T j		female	na	Finish_primary	home	yes	post	999	30	Yes	30_39	no	yes	999	no	not_too_far	yes	uuid:46be63f1-d73d-4fe5-9bd8-b3dbe5ede9ee	pregnant					uuid:46be63f1-d73d-4fe5-9bd8-b3dbe5ede9ee	na					uuid:46be63f1-d73d-4fe5-9bd8-b3dbe5ede9ee	help_me					uuid:46be63f1-d73d-4fe5-9bd8-b3dbe5ede9ee	n/a					uuid:46be63f1-d73d-4fe5-9bd8-b3dbe5ede9ee
uuid:46c25c8d-920c-46a0-b00c-cb75134a94d0	na_not_aware_of_post	dk	5	yes	na	1018	Da		female	na	Some_secondary	na	no	na	0	23	No	18_29	no	na	999	na	na_not_aware_post	unknown	uuid:46c25c8d-920c-46a0-b00c-cb75134a94d0	dk					uuid:46c25c8d-920c-46a0-b00c-cb75134a94d0	na					uuid:46c25c8d-920c-46a0-b00c-cb75134a94d0	help_me					uuid:46c25c8d-920c-46a0-b00c-cb75134a94d0	n/a					uuid:46c25c8d-920c-46a0-b00c-cb75134a94d0
uuid:46e79089-fc4c-4c15-898f-7401c55d2d62	yes	no	1	yes	yes	33	Jj		male	na	Some_secondary	post	yes	post	3	24	Yes	18_29	yes	yes	999	yes	close	yes	uuid:46e79089-fc4c-4c15-898f-7401c55d2d62	pregnant					uuid:46e79089-fc4c-4c15-898f-7401c55d2d62	action					uuid:46e79089-fc4c-4c15-898f-7401c55d2d62	na_already_convinced					uuid:46e79089-fc4c-4c15-898f-7401c55d2d62	clean_water					uuid:46e79089-fc4c-4c15-898f-7401c55d2d62
uuid:46f34929-cc1c-42bc-a8fc-44cf0b0fe1ed	yes	no	3	yes	yes	2972	Vc	Hrhd	female	1	No	post	no	post	2	70	Yes	70_79	yes	yes	999	yes	not_too_far	yes	uuid:46f34929-cc1c-42bc-a8fc-44cf0b0fe1ed	pregnant					uuid:46f34929-cc1c-42bc-a8fc-44cf0b0fe1ed	dk					uuid:46f34929-cc1c-42bc-a8fc-44cf0b0fe1ed	help_family					uuid:46f34929-cc1c-42bc-a8fc-44cf0b0fe1ed	unknown					uuid:46f34929-cc1c-42bc-a8fc-44cf0b0fe1ed
uuid:47390794-c52a-4786-8df4-18c673e0f009	yes	no	1	yes	yes	46	Ia		female	na	Primary	post	yes	post	1	40	Yes	40_49	yes	yes	999	no	not_too_far	yes	uuid:47390794-c52a-4786-8df4-18c673e0f009	pregnant					uuid:47390794-c52a-4786-8df4-18c673e0f009	na					uuid:47390794-c52a-4786-8df4-18c673e0f009	na_already_convinced					uuid:47390794-c52a-4786-8df4-18c673e0f009	clean_water					uuid:47390794-c52a-4786-8df4-18c673e0f009
uuid:47b8055a-6011-409d-889d-3104de207572	yes	no	4	yes	yes	2505	Yg	Li gen ve ya nan san l	female	na	No	post	yes	post	3	50	Yes	50_59	yes	yes	999	yes	close	yes	uuid:47b8055a-6011-409d-889d-3104de207572	dk					uuid:47b8055a-6011-409d-889d-3104de207572	worm					uuid:47b8055a-6011-409d-889d-3104de207572	na_already_convinced					uuid:47b8055a-6011-409d-889d-3104de207572	unknown					uuid:47b8055a-6011-409d-889d-3104de207572
uuid:47bcfe19-1cac-40f6-8a47-151bdc1141eb	yes	no	5	yes	yes	2698	Re		female	na	No	post	yes	post	2	48	Yes	40_49	yes	yes	999	no	close	yes	uuid:47bcfe19-1cac-40f6-8a47-151bdc1141eb	pregnant					uuid:47bcfe19-1cac-40f6-8a47-151bdc1141eb	na					uuid:47bcfe19-1cac-40f6-8a47-151bdc1141eb	side_effect					uuid:47bcfe19-1cac-40f6-8a47-151bdc1141eb	clean_water					uuid:47bcfe19-1cac-40f6-8a47-151bdc1141eb
uuid:47f0d25a-938e-4c2a-b0d3-1dd64a55f9da	yes	no	5	yes	yes	2683	Al		male	na	No	post	yes	post	2	45	Yes	40_49	no	yes	999	no	not_too_far	yes	uuid:47f0d25a-938e-4c2a-b0d3-1dd64a55f9da	dk					uuid:47f0d25a-938e-4c2a-b0d3-1dd64a55f9da	na					uuid:47f0d25a-938e-4c2a-b0d3-1dd64a55f9da	uk					uuid:47f0d25a-938e-4c2a-b0d3-1dd64a55f9da	n/a					uuid:47f0d25a-938e-4c2a-b0d3-1dd64a55f9da
uuid:4806cc1c-e5fa-40c1-aea6-ed81ff351cca	yes	no	1	yes	yes	2596	mi		male	na	Some_secondary	post	yes	post	1	23	Yes	18_29	yes	yes	999	yes	close	yes	uuid:4806cc1c-e5fa-40c1-aea6-ed81ff351cca	other					uuid:4806cc1c-e5fa-40c1-aea6-ed81ff351cca	dk					uuid:4806cc1c-e5fa-40c1-aea6-ed81ff351cca	na_already_convinced					uuid:4806cc1c-e5fa-40c1-aea6-ed81ff351cca	clean_water					uuid:4806cc1c-e5fa-40c1-aea6-ed81ff351cca
uuid:4806f217-7b9d-4475-931d-c199fddce8ae	yes	dk	2	yes	dk	944	fl		female	na	No	home	yes	home	2	65	Yes	60_69	yes	yes	999	no	dk	yes	uuid:4806f217-7b9d-4475-931d-c199fddce8ae	dk					uuid:4806f217-7b9d-4475-931d-c199fddce8ae	na					uuid:4806f217-7b9d-4475-931d-c199fddce8ae	na_already_convinced					uuid:4806f217-7b9d-4475-931d-c199fddce8ae	unknown					uuid:4806f217-7b9d-4475-931d-c199fddce8ae
uuid:485cbe06-d9ab-43d3-978b-6502825624a7	dk	dk	2	yes	na	334	cc		female	na	Primary	na	yes	na	2	26	Yes	18_29	yes	na	999	na	dk	no	uuid:485cbe06-d9ab-43d3-978b-6502825624a7	pregnant					uuid:485cbe06-d9ab-43d3-978b-6502825624a7	na					uuid:485cbe06-d9ab-43d3-978b-6502825624a7	uk					uuid:485cbe06-d9ab-43d3-978b-6502825624a7	unknown					uuid:485cbe06-d9ab-43d3-978b-6502825624a7
uuid:486dea52-8110-4ef4-95f9-f00cf8a6eee2	yes	no	2	yes	yes	557	aa		female	na	Primary	post	yes	post	3	48	Yes	40_49	yes	yes	999	no	close	yes	uuid:486dea52-8110-4ef4-95f9-f00cf8a6eee2	pregnant					uuid:486dea52-8110-4ef4-95f9-f00cf8a6eee2	na					uuid:486dea52-8110-4ef4-95f9-f00cf8a6eee2	na_already_convinced					uuid:486dea52-8110-4ef4-95f9-f00cf8a6eee2	unknown					uuid:486dea52-8110-4ef4-95f9-f00cf8a6eee2
uuid:48a2b2d0-c100-4b22-946e-f7d51bbe211a	yes	no	4	dk	yes	167	T i		female	na	No	post	yes	post	999	70	Yes	70_79	no	yes	999	no	not_too_far	yes	uuid:48a2b2d0-c100-4b22-946e-f7d51bbe211a	dk					uuid:48a2b2d0-c100-4b22-946e-f7d51bbe211a	na					uuid:48a2b2d0-c100-4b22-946e-f7d51bbe211a	uk					uuid:48a2b2d0-c100-4b22-946e-f7d51bbe211a	n/a					uuid:48a2b2d0-c100-4b22-946e-f7d51bbe211a
uuid:48b2ffa1-e54b-4239-adbb-c54786b34779	yes	no	5	yes	yes	249	Ej		male	na	No	post	yes	post	3	70	Yes	70_79	yes	yes	999	yes	not_too_far	yes	uuid:48b2ffa1-e54b-4239-adbb-c54786b34779	pregnant					uuid:48b2ffa1-e54b-4239-adbb-c54786b34779	dk					uuid:48b2ffa1-e54b-4239-adbb-c54786b34779	help_me					uuid:48b2ffa1-e54b-4239-adbb-c54786b34779	bednets					uuid:48b2ffa1-e54b-4239-adbb-c54786b34779
uuid:48f3600f-1b1f-4b77-93b1-9beeccf5bff3	yes	no	4	yes	yes	201	J t		male	na	University	post	no	post	999	35	Yes	30_39	yes	yes	999	no	far	yes	uuid:48f3600f-1b1f-4b77-93b1-9beeccf5bff3	pregnant					uuid:48f3600f-1b1f-4b77-93b1-9beeccf5bff3	na					uuid:48f3600f-1b1f-4b77-93b1-9beeccf5bff3	help_me					uuid:48f3600f-1b1f-4b77-93b1-9beeccf5bff3	clean_water					uuid:48f3600f-1b1f-4b77-93b1-9beeccf5bff3
uuid:49509adf-10b2-4c05-b0bd-3b6ff90c41d9	yes	no	1	yes	yes	278	Mc		female	na	No	post	yes	post	1	48	Yes	40_49	yes	yes	999	yes	close	yes	uuid:49509adf-10b2-4c05-b0bd-3b6ff90c41d9	pregnant					uuid:49509adf-10b2-4c05-b0bd-3b6ff90c41d9	action					uuid:49509adf-10b2-4c05-b0bd-3b6ff90c41d9	na_already_convinced					uuid:49509adf-10b2-4c05-b0bd-3b6ff90c41d9	iftreat					uuid:49509adf-10b2-4c05-b0bd-3b6ff90c41d9
uuid:4998e474-f409-44f5-abb6-1fedfb1c74b0	yes	no	1	yes	yes	2	Ssc		male	na	No	post	yes	post	2	41	Yes	40_49	yes	yes	999	no	close	yes	uuid:4998e474-f409-44f5-abb6-1fedfb1c74b0	pregnant					uuid:4998e474-f409-44f5-abb6-1fedfb1c74b0	na					uuid:4998e474-f409-44f5-abb6-1fedfb1c74b0	na_already_convinced					uuid:4998e474-f409-44f5-abb6-1fedfb1c74b0	iftreat					uuid:4998e474-f409-44f5-abb6-1fedfb1c74b0
uuid:49a64ddd-6b80-400b-bf08-7a9cea14dc13	yes	no	1	yes	yes	597	Al		male	na	Primary	school	yes	school	1	19	Yes	18_29	yes	yes	999	yes	not_too_far	yes	uuid:49a64ddd-6b80-400b-bf08-7a9cea14dc13	pregnant					uuid:49a64ddd-6b80-400b-bf08-7a9cea14dc13	not_eat					uuid:49a64ddd-6b80-400b-bf08-7a9cea14dc13	na_already_convinced					uuid:49a64ddd-6b80-400b-bf08-7a9cea14dc13	iftreat					uuid:49a64ddd-6b80-400b-bf08-7a9cea14dc13
uuid:49b56b72-bc32-4de5-bb21-85eebc1808b7	yes	no	5	yes	yes	318	an		female	na	No	post	yes	post	2	47	Yes	40_49	yes	yes	999	yes	close	yes	uuid:49b56b72-bc32-4de5-bb21-85eebc1808b7	dk					uuid:49b56b72-bc32-4de5-bb21-85eebc1808b7	dk					uuid:49b56b72-bc32-4de5-bb21-85eebc1808b7	na_already_convinced					uuid:49b56b72-bc32-4de5-bb21-85eebc1808b7	unknown					uuid:49b56b72-bc32-4de5-bb21-85eebc1808b7
uuid:49bf8993-b649-489b-b7f1-44b40ee6b4ef	no	no	5	yes	yes	243	Ra		female	na	Primary	post	yes	post	3	62	Yes	60_69	yes	yes	999	no	close	yes	uuid:49bf8993-b649-489b-b7f1-44b40ee6b4ef	pregnant					uuid:49bf8993-b649-489b-b7f1-44b40ee6b4ef	na					uuid:49bf8993-b649-489b-b7f1-44b40ee6b4ef	help_me					uuid:49bf8993-b649-489b-b7f1-44b40ee6b4ef	bednets					uuid:49bf8993-b649-489b-b7f1-44b40ee6b4ef
uuid:49c322e3-17bc-409f-ac34-cc862a5453a2	yes	no	1	yes	yes	8	Dd		male	na	Some_secondary	post	yes	post	1	28	Yes	18_29	yes	yes	999	yes	close	yes	uuid:49c322e3-17bc-409f-ac34-cc862a5453a2	pregnant					uuid:49c322e3-17bc-409f-ac34-cc862a5453a2	action					uuid:49c322e3-17bc-409f-ac34-cc862a5453a2	na_already_convinced					uuid:49c322e3-17bc-409f-ac34-cc862a5453a2	bednets					uuid:49c322e3-17bc-409f-ac34-cc862a5453a2
uuid:4a2a03c8-3877-4c4c-b515-bcd3f69fed69	yes	no	2	yes	yes	2783	em		female	na	No	post	yes	post	2	75	Yes	70_79	yes	yes	999	no	close	yes	uuid:4a2a03c8-3877-4c4c-b515-bcd3f69fed69	dk					uuid:4a2a03c8-3877-4c4c-b515-bcd3f69fed69	na					uuid:4a2a03c8-3877-4c4c-b515-bcd3f69fed69	uk					uuid:4a2a03c8-3877-4c4c-b515-bcd3f69fed69	unknown					uuid:4a2a03c8-3877-4c4c-b515-bcd3f69fed69
uuid:4a4009a1-c39d-465a-bb12-04d68be1a583	dk	dk	3	dk	na	145	Mp	Vxhxs	female	na	Some_secondary	na	no	na	1	24	No	18_29	yes	na	999	na	dk	no	uuid:4a4009a1-c39d-465a-bb12-04d68be1a583	pregnant					uuid:4a4009a1-c39d-465a-bb12-04d68be1a583	na					uuid:4a4009a1-c39d-465a-bb12-04d68be1a583	side_effect					uuid:4a4009a1-c39d-465a-bb12-04d68be1a583	unknown					uuid:4a4009a1-c39d-465a-bb12-04d68be1a583
uuid:4a6c88a1-3fa9-446e-816b-700e3c198fb9	na_not_aware_of_post	no	1	yes	na	2656	Hi		female	na	Primary	na	yes	na	1	39	Yes	30_39	yes	no	999	na	na_not_aware_post	no	uuid:4a6c88a1-3fa9-446e-816b-700e3c198fb9	pregnant					uuid:4a6c88a1-3fa9-446e-816b-700e3c198fb9	na					uuid:4a6c88a1-3fa9-446e-816b-700e3c198fb9	na_already_convinced					uuid:4a6c88a1-3fa9-446e-816b-700e3c198fb9	clean_water					uuid:4a6c88a1-3fa9-446e-816b-700e3c198fb9
uuid:4a7a318a-f46d-4c7b-aaea-32590f92c046	yes	no	5	yes	yes	408	Vs		female	na	No	post	yes	post	2	40	Yes	40_49	yes	yes	999	no	close	yes	uuid:4a7a318a-f46d-4c7b-aaea-32590f92c046	pregnant					uuid:4a7a318a-f46d-4c7b-aaea-32590f92c046	na					uuid:4a7a318a-f46d-4c7b-aaea-32590f92c046	uk					uuid:4a7a318a-f46d-4c7b-aaea-32590f92c046	clean_water					uuid:4a7a318a-f46d-4c7b-aaea-32590f92c046
uuid:4a7cd929-a96f-4d75-a385-1f2733984c19	na_not_aware_of_post	dk	5	dk	na	281	Ir	Li pap viv ayiti	female	na	Some_secondary	na	dk	na	0	36	No	30_39	yes	no	999	na	na_not_aware_post	no	uuid:4a7cd929-a96f-4d75-a385-1f2733984c19	dk					uuid:4a7cd929-a96f-4d75-a385-1f2733984c19	na					uuid:4a7cd929-a96f-4d75-a385-1f2733984c19	other					uuid:4a7cd929-a96f-4d75-a385-1f2733984c19	n/a					uuid:4a7cd929-a96f-4d75-a385-1f2733984c19
uuid:4aa9fd57-d107-4008-b74e-acfda3c057c5	yes	no	1	yes	yes	10	Ml		male	na	Some_secondary	post	yes	post	2	30	Yes	30_39	yes	yes	999	no	close	yes	uuid:4aa9fd57-d107-4008-b74e-acfda3c057c5	pregnant					uuid:4aa9fd57-d107-4008-b74e-acfda3c057c5	na					uuid:4aa9fd57-d107-4008-b74e-acfda3c057c5	na_already_convinced					uuid:4aa9fd57-d107-4008-b74e-acfda3c057c5	clean_water					uuid:4aa9fd57-d107-4008-b74e-acfda3c057c5
uuid:4aaba1b0-11a7-402c-8f0f-0894751108bb	yes	no	1	yes	yes	2622	as		female	na	Primary	post	no	post	0	38	Yes	30_39	yes	yes	999	yes	not_too_far	yes	uuid:4aaba1b0-11a7-402c-8f0f-0894751108bb	pregnant					uuid:4aaba1b0-11a7-402c-8f0f-0894751108bb	dk					uuid:4aaba1b0-11a7-402c-8f0f-0894751108bb	na_already_convinced					uuid:4aaba1b0-11a7-402c-8f0f-0894751108bb	iftreat					uuid:4aaba1b0-11a7-402c-8f0f-0894751108bb
uuid:4aeb51e8-90da-4cd3-bb5f-b70035edf615	yes	no	2	yes	yes	2785	rg		male	na	No	post	yes	post	2	22	Yes	18_29	yes	yes	999	no	close	yes	uuid:4aeb51e8-90da-4cd3-bb5f-b70035edf615	dk					uuid:4aeb51e8-90da-4cd3-bb5f-b70035edf615	na					uuid:4aeb51e8-90da-4cd3-bb5f-b70035edf615	na_already_convinced					uuid:4aeb51e8-90da-4cd3-bb5f-b70035edf615	unknown					uuid:4aeb51e8-90da-4cd3-bb5f-b70035edf615
uuid:4b2f8683-f2fa-4e6c-a2b5-ba4613839cc6	yes	no	2	yes	yes	329	fd		female	na	Some_secondary	post	yes	post	2	30	Yes	30_39	yes	yes	999	yes	close	yes	uuid:4b2f8683-f2fa-4e6c-a2b5-ba4613839cc6	dk					uuid:4b2f8683-f2fa-4e6c-a2b5-ba4613839cc6	dk					uuid:4b2f8683-f2fa-4e6c-a2b5-ba4613839cc6	na_already_convinced					uuid:4b2f8683-f2fa-4e6c-a2b5-ba4613839cc6	unknown					uuid:4b2f8683-f2fa-4e6c-a2b5-ba4613839cc6
uuid:4b368461-cb97-4d06-86d5-17b4569a4709	yes	no	3	yes	yes	119	Eb	Guc	male	1	No	post	yes	post	3	80	Yes	80_89	yes	yes	999	no	not_too_far	yes	uuid:4b368461-cb97-4d06-86d5-17b4569a4709	pregnant					uuid:4b368461-cb97-4d06-86d5-17b4569a4709	na					uuid:4b368461-cb97-4d06-86d5-17b4569a4709	side_effect					uuid:4b368461-cb97-4d06-86d5-17b4569a4709	iftreat					uuid:4b368461-cb97-4d06-86d5-17b4569a4709
uuid:4b719e23-8017-49b9-bf5b-845047bdf5bd	yes	no	5	yes	yes	220	Ro		male	na	Some_secondary	post	yes	post	3	48	Yes	40_49	yes	yes	4	no	close	yes	uuid:4b719e23-8017-49b9-bf5b-845047bdf5bd	pregnant					uuid:4b719e23-8017-49b9-bf5b-845047bdf5bd	na					uuid:4b719e23-8017-49b9-bf5b-845047bdf5bd	uk					uuid:4b719e23-8017-49b9-bf5b-845047bdf5bd	clean_water					uuid:4b719e23-8017-49b9-bf5b-845047bdf5bd
uuid:4b763332-9ca1-4cb1-9a13-23bd806633bb	yes	no	1	yes	na	2602	mm		male	na	No	home	yes	home	1	60	Yes	60_69	yes	yes	999	yes	not_too_far	yes	uuid:4b763332-9ca1-4cb1-9a13-23bd806633bb	dk					uuid:4b763332-9ca1-4cb1-9a13-23bd806633bb	worm					uuid:4b763332-9ca1-4cb1-9a13-23bd806633bb	na_already_convinced					uuid:4b763332-9ca1-4cb1-9a13-23bd806633bb	unknown					uuid:4b763332-9ca1-4cb1-9a13-23bd806633bb
uuid:4b9ad33b-2481-4f3e-804b-a4af613b3e54	yes	no	5	yes	yes	402	cd		female	na	Some_secondary	school	yes	school	3	19	Yes	18_29	yes	yes	999	no	other	yes	uuid:4b9ad33b-2481-4f3e-804b-a4af613b3e54	pregnant					uuid:4b9ad33b-2481-4f3e-804b-a4af613b3e54	na					uuid:4b9ad33b-2481-4f3e-804b-a4af613b3e54	na_already_convinced					uuid:4b9ad33b-2481-4f3e-804b-a4af613b3e54	clean_water					uuid:4b9ad33b-2481-4f3e-804b-a4af613b3e54
uuid:4b9bb841-017c-4c21-a9ae-63326b8eda0a	yes	no	2	yes	yes	2774	Aa		female	na	Primary	home	yes	home	2	60	Yes	60_69	yes	yes	999	no	close	yes	uuid:4b9bb841-017c-4c21-a9ae-63326b8eda0a	pregnant					uuid:4b9bb841-017c-4c21-a9ae-63326b8eda0a	na					uuid:4b9bb841-017c-4c21-a9ae-63326b8eda0a	help_me					uuid:4b9bb841-017c-4c21-a9ae-63326b8eda0a	bednets					uuid:4b9bb841-017c-4c21-a9ae-63326b8eda0a
uuid:4bf6de85-8af2-4e1e-82da-532a8b88ccfc	yes	no	2	yes	yes	334	lo		male	na	Some_secondary	post	yes	post	3	20	Yes	18_29	yes	yes	1	yes	close	yes	uuid:4bf6de85-8af2-4e1e-82da-532a8b88ccfc	pregnant					uuid:4bf6de85-8af2-4e1e-82da-532a8b88ccfc	action					uuid:4bf6de85-8af2-4e1e-82da-532a8b88ccfc	uk					uuid:4bf6de85-8af2-4e1e-82da-532a8b88ccfc	clean_water					uuid:4bf6de85-8af2-4e1e-82da-532a8b88ccfc
uuid:4c345594-58bf-45cc-b381-14ea64779418	yes	no	3	yes	yes	109	Yj	Gtgd	male	1	Primary	post	yes	post	3	34	Yes	30_39	yes	yes	999	no	close	yes	uuid:4c345594-58bf-45cc-b381-14ea64779418	pregnant					uuid:4c345594-58bf-45cc-b381-14ea64779418	na					uuid:4c345594-58bf-45cc-b381-14ea64779418	side_effect					uuid:4c345594-58bf-45cc-b381-14ea64779418	iftreat					uuid:4c345594-58bf-45cc-b381-14ea64779418
uuid:4c3e1f37-961b-42c0-8920-0c60011b5cc5	dk	dk	3	dk	na	111	Dl	Hdc	female	dk	Primary	na	no	na	1	20	Yes	18_29	yes	na	5	na	dk	no	uuid:4c3e1f37-961b-42c0-8920-0c60011b5cc5	pregnant					uuid:4c3e1f37-961b-42c0-8920-0c60011b5cc5	na					uuid:4c3e1f37-961b-42c0-8920-0c60011b5cc5	side_effect					uuid:4c3e1f37-961b-42c0-8920-0c60011b5cc5	iftreat					uuid:4c3e1f37-961b-42c0-8920-0c60011b5cc5
uuid:4c6da61d-6066-4f6b-bfee-dda429a5f918	other	dk	5	other	no	1016	Bj		female	na	No	home	yes	home	2	999	Yes	80_89	no	yes	999	no	not_too_far	yes	uuid:4c6da61d-6066-4f6b-bfee-dda429a5f918	dk					uuid:4c6da61d-6066-4f6b-bfee-dda429a5f918	na					uuid:4c6da61d-6066-4f6b-bfee-dda429a5f918	uk					uuid:4c6da61d-6066-4f6b-bfee-dda429a5f918	n/a					uuid:4c6da61d-6066-4f6b-bfee-dda429a5f918
uuid:4c8e20d5-bc9b-46f8-bb4f-7d324c04e6d3	yes	no	3	yes	yes	114	Lj	Fdh	female	1	No	post	yes	post	3	32	Yes	30_39	yes	yes	999	no	not_too_far	yes	uuid:4c8e20d5-bc9b-46f8-bb4f-7d324c04e6d3	pregnant					uuid:4c8e20d5-bc9b-46f8-bb4f-7d324c04e6d3	na					uuid:4c8e20d5-bc9b-46f8-bb4f-7d324c04e6d3	side_effect					uuid:4c8e20d5-bc9b-46f8-bb4f-7d324c04e6d3	unknown					uuid:4c8e20d5-bc9b-46f8-bb4f-7d324c04e6d3
uuid:4c9ff921-835b-4e2e-aa86-e19d679cfa80	yes	no	5	yes	yes	396	ca		male	na	Primary	post	yes	post	2	18	Yes	18_29	yes	yes	999	no	close	yes	uuid:4c9ff921-835b-4e2e-aa86-e19d679cfa80	pregnant					uuid:4c9ff921-835b-4e2e-aa86-e19d679cfa80	na					uuid:4c9ff921-835b-4e2e-aa86-e19d679cfa80	side_effect					uuid:4c9ff921-835b-4e2e-aa86-e19d679cfa80	clean_water					uuid:4c9ff921-835b-4e2e-aa86-e19d679cfa80
uuid:4ca01b43-0d72-4279-ab10-3e28056e6c3f	yes	no	1	yes	yes	2613	Cd		female	na	No	post	yes	post	2	38	Yes	30_39	yes	yes	999	no	not_too_far	yes	uuid:4ca01b43-0d72-4279-ab10-3e28056e6c3f	pregnant					uuid:4ca01b43-0d72-4279-ab10-3e28056e6c3f	na					uuid:4ca01b43-0d72-4279-ab10-3e28056e6c3f	na_already_convinced					uuid:4ca01b43-0d72-4279-ab10-3e28056e6c3f	iftreat					uuid:4ca01b43-0d72-4279-ab10-3e28056e6c3f
uuid:4ca36b0c-7b06-4cb5-bbe8-22b744a88120	dk	dk	2	yes	na	62	lc		female	na	No	na	no	na	999	60	Yes	60_69	yes	na	999	na	dk	no	uuid:4ca36b0c-7b06-4cb5-bbe8-22b744a88120	dk					uuid:4ca36b0c-7b06-4cb5-bbe8-22b744a88120	na					uuid:4ca36b0c-7b06-4cb5-bbe8-22b744a88120	uk					uuid:4ca36b0c-7b06-4cb5-bbe8-22b744a88120	unknown					uuid:4ca36b0c-7b06-4cb5-bbe8-22b744a88120
uuid:4ca463cd-e2ec-414d-bd00-bb1a1647cc22	yes	no	5	yes	yes	240	Df		male	dk	Some_secondary	school	yes	school	3	19	Yes	18_29	yes	yes	999	no	close	yes	uuid:4ca463cd-e2ec-414d-bd00-bb1a1647cc22	pregnant					uuid:4ca463cd-e2ec-414d-bd00-bb1a1647cc22	na					uuid:4ca463cd-e2ec-414d-bd00-bb1a1647cc22	na_already_convinced					uuid:4ca463cd-e2ec-414d-bd00-bb1a1647cc22	bednets					uuid:4ca463cd-e2ec-414d-bd00-bb1a1647cc22
uuid:4d354a0d-674e-404d-ae89-1c5a87e922a9	yes	no	1	yes	yes	2797	mji		female	na	No	post	yes	post	1	50	Yes	50_59	yes	yes	999	yes	close	yes	uuid:4d354a0d-674e-404d-ae89-1c5a87e922a9	dk					uuid:4d354a0d-674e-404d-ae89-1c5a87e922a9	dk					uuid:4d354a0d-674e-404d-ae89-1c5a87e922a9	na_already_convinced					uuid:4d354a0d-674e-404d-ae89-1c5a87e922a9	iftreat					uuid:4d354a0d-674e-404d-ae89-1c5a87e922a9
uuid:4d5e22ff-a9f6-48ad-a528-05561983f6c1	yes	no	2	yes	yes	258	le		female	na	Primary	post	yes	post	1	18	Yes	18_29	yes	yes	999	yes	close	yes	uuid:4d5e22ff-a9f6-48ad-a528-05561983f6c1	pregnant					uuid:4d5e22ff-a9f6-48ad-a528-05561983f6c1	dk					uuid:4d5e22ff-a9f6-48ad-a528-05561983f6c1	uk					uuid:4d5e22ff-a9f6-48ad-a528-05561983f6c1	unknown					uuid:4d5e22ff-a9f6-48ad-a528-05561983f6c1
uuid:4d8fc017-d088-4db4-9706-8dde4d41fc8b	yes	no	2	yes	yes	951	am		female	na	No	post	yes	post	3	46	Yes	40_49	yes	yes	999	no	not_too_far	yes	uuid:4d8fc017-d088-4db4-9706-8dde4d41fc8b	pregnant					uuid:4d8fc017-d088-4db4-9706-8dde4d41fc8b	dk					uuid:4d8fc017-d088-4db4-9706-8dde4d41fc8b	na_already_convinced					uuid:4d8fc017-d088-4db4-9706-8dde4d41fc8b	unknown					uuid:4d8fc017-d088-4db4-9706-8dde4d41fc8b
uuid:4db6b643-c0ea-414e-8057-b052bbc2374c	yes	no	1	yes	yes	757	Gj		male	na	Some_secondary	post	yes	post	3	32	Yes	30_39	yes	yes	999	no	close	yes	uuid:4db6b643-c0ea-414e-8057-b052bbc2374c	pregnant					uuid:4db6b643-c0ea-414e-8057-b052bbc2374c	na					uuid:4db6b643-c0ea-414e-8057-b052bbc2374c	na_already_convinced					uuid:4db6b643-c0ea-414e-8057-b052bbc2374c	bednets					uuid:4db6b643-c0ea-414e-8057-b052bbc2374c
uuid:4e026e89-a529-4c64-a499-f59f44842e55	yes	no	2	yes	yes	950	yp		female	na	Primary	post	yes	post	2	55	Yes	50_59	yes	yes	999	yes	close	yes	uuid:4e026e89-a529-4c64-a499-f59f44842e55	pregnant					uuid:4e026e89-a529-4c64-a499-f59f44842e55	dk					uuid:4e026e89-a529-4c64-a499-f59f44842e55	uk					uuid:4e026e89-a529-4c64-a499-f59f44842e55	unknown					uuid:4e026e89-a529-4c64-a499-f59f44842e55
uuid:4e517c70-0dcf-4850-a110-dd0bc7346128	yes	no	1	yes	yes	289	Ms		male	na	Some_secondary	post	yes	post	3	42	Yes	40_49	yes	yes	999	no	not_too_far	yes	uuid:4e517c70-0dcf-4850-a110-dd0bc7346128	pregnant					uuid:4e517c70-0dcf-4850-a110-dd0bc7346128	na					uuid:4e517c70-0dcf-4850-a110-dd0bc7346128	na_already_convinced					uuid:4e517c70-0dcf-4850-a110-dd0bc7346128	clean_water					uuid:4e517c70-0dcf-4850-a110-dd0bc7346128
uuid:4e6f5559-9b14-415d-9c3b-297161bade4c	yes	no	2	yes	yes	265	cd		female	na	No	post	yes	post	3	60	Yes	60_69	yes	yes	999	yes	close	yes	uuid:4e6f5559-9b14-415d-9c3b-297161bade4c	dk					uuid:4e6f5559-9b14-415d-9c3b-297161bade4c	dk					uuid:4e6f5559-9b14-415d-9c3b-297161bade4c	na_already_convinced					uuid:4e6f5559-9b14-415d-9c3b-297161bade4c	unknown					uuid:4e6f5559-9b14-415d-9c3b-297161bade4c
uuid:4e831842-6667-4a29-b94c-651903690e91	yes	no	1	yes	yes	2614	Nj		female	na	Some_secondary	home	no	post	0	26	Yes	18_29	yes	yes	999	yes	not_too_far	yes	uuid:4e831842-6667-4a29-b94c-651903690e91	dk					uuid:4e831842-6667-4a29-b94c-651903690e91	dk					uuid:4e831842-6667-4a29-b94c-651903690e91	na_already_convinced					uuid:4e831842-6667-4a29-b94c-651903690e91	iftreat					uuid:4e831842-6667-4a29-b94c-651903690e91
uuid:4e856baa-3c20-4266-a50f-a1da55b7b51f	yes	yes	2	yes	yes	75	cf		male	1	Primary	post	yes	post	2	22	Yes	18_29	yes	yes	999	no	close	yes	uuid:4e856baa-3c20-4266-a50f-a1da55b7b51f	pregnant					uuid:4e856baa-3c20-4266-a50f-a1da55b7b51f	na					uuid:4e856baa-3c20-4266-a50f-a1da55b7b51f	uk					uuid:4e856baa-3c20-4266-a50f-a1da55b7b51f	unknown					uuid:4e856baa-3c20-4266-a50f-a1da55b7b51f
uuid:4ef3ebd6-d943-4d43-97c5-23b0bc1eddde	yes	no	2	yes	yes	311	md		female	na	No	post	yes	post	4	56	Yes	50_59	yes	yes	999	no	close	yes	uuid:4ef3ebd6-d943-4d43-97c5-23b0bc1eddde	pregnant					uuid:4ef3ebd6-d943-4d43-97c5-23b0bc1eddde	na					uuid:4ef3ebd6-d943-4d43-97c5-23b0bc1eddde	uk					uuid:4ef3ebd6-d943-4d43-97c5-23b0bc1eddde	clean_water					uuid:4ef3ebd6-d943-4d43-97c5-23b0bc1eddde
uuid:4f137593-2cbc-40f2-8dec-f9145eeedf4b	yes	no	1	yes	yes	597	Mb		female	na	Finish_primary	school	yes	school	1	18	Yes	18_29	yes	yes	999	yes	not_too_far	yes	uuid:4f137593-2cbc-40f2-8dec-f9145eeedf4b	pregnant					uuid:4f137593-2cbc-40f2-8dec-f9145eeedf4b	action					uuid:4f137593-2cbc-40f2-8dec-f9145eeedf4b	na_already_convinced					uuid:4f137593-2cbc-40f2-8dec-f9145eeedf4b	unknown					uuid:4f137593-2cbc-40f2-8dec-f9145eeedf4b
uuid:4f1e7e6f-49ea-4aba-9300-5662f73fdff2	yes	no	1	yes	yes	581	Ve		female	na	Primary	post	yes	post	2	47	Yes	40_49	yes	yes	999	yes	close	yes	uuid:4f1e7e6f-49ea-4aba-9300-5662f73fdff2	pregnant					uuid:4f1e7e6f-49ea-4aba-9300-5662f73fdff2	worm					uuid:4f1e7e6f-49ea-4aba-9300-5662f73fdff2	na_already_convinced					uuid:4f1e7e6f-49ea-4aba-9300-5662f73fdff2	clean_water					uuid:4f1e7e6f-49ea-4aba-9300-5662f73fdff2
uuid:4f613b59-da67-4817-b053-68e52886d142	na_not_aware_of_post	dk	3	dk	na	135	Sa	Bff	female	na	Finish_primary	na	no	na	2	39	DK	30_39	yes	na	999	yes	na_not_aware_post	no	uuid:4f613b59-da67-4817-b053-68e52886d142	dk					uuid:4f613b59-da67-4817-b053-68e52886d142	dk					uuid:4f613b59-da67-4817-b053-68e52886d142	side_effect					uuid:4f613b59-da67-4817-b053-68e52886d142	unknown					uuid:4f613b59-da67-4817-b053-68e52886d142
uuid:4fa9b095-43f5-4329-9f52-361d45c31447	other	no	5	yes	no	300	Od	Se yon moun ki pa fin tro tem ki gen pwoblem nan tet.	male	na	No	home	yes	home	2	20	No	18_29	no	yes	999	na	not_too_far	yes	uuid:4fa9b095-43f5-4329-9f52-361d45c31447	dk					uuid:4fa9b095-43f5-4329-9f52-361d45c31447	na					uuid:4fa9b095-43f5-4329-9f52-361d45c31447	uk					uuid:4fa9b095-43f5-4329-9f52-361d45c31447	n/a					uuid:4fa9b095-43f5-4329-9f52-361d45c31447
uuid:4fbd2c64-e264-45e7-a862-523c265c15c5	yes	no	2	yes	yes	336	pr		male	na	University	post	yes	post	3	45	Yes	40_49	yes	yes	999	no	close	yes	uuid:4fbd2c64-e264-45e7-a862-523c265c15c5	pregnant					uuid:4fbd2c64-e264-45e7-a862-523c265c15c5	na					uuid:4fbd2c64-e264-45e7-a862-523c265c15c5	uk					uuid:4fbd2c64-e264-45e7-a862-523c265c15c5	clean_water					uuid:4fbd2c64-e264-45e7-a862-523c265c15c5
uuid:4fbe61cc-1dee-415f-9bef-b00edc325072	yes	no	4	yes	yes	259	C c		female	na	Primary	home	yes	home	1	32	Yes	30_39	yes	yes	999	no	other	yes	uuid:4fbe61cc-1dee-415f-9bef-b00edc325072	dk					uuid:4fbe61cc-1dee-415f-9bef-b00edc325072	na					uuid:4fbe61cc-1dee-415f-9bef-b00edc325072	help_me					uuid:4fbe61cc-1dee-415f-9bef-b00edc325072	n/a					uuid:4fbe61cc-1dee-415f-9bef-b00edc325072
uuid:4fdabc81-f9b5-4eb9-af8e-e0da82ab2acd	yes	no	5	yes	yes	165	ce	pk	female	dk	Primary	post	yes	post	3	18	Yes	18_29	yes	yes	999	yes	not_too_far	yes	uuid:4fdabc81-f9b5-4eb9-af8e-e0da82ab2acd	pregnant					uuid:4fdabc81-f9b5-4eb9-af8e-e0da82ab2acd	dk					uuid:4fdabc81-f9b5-4eb9-af8e-e0da82ab2acd	uk					uuid:4fdabc81-f9b5-4eb9-af8e-e0da82ab2acd	clean_water					uuid:4fdabc81-f9b5-4eb9-af8e-e0da82ab2acd
uuid:4fdb55fa-1707-42be-89d6-33423aad197a	yes	no	4	yes	yes	151	J b	Ol	male	na	Primary	post	yes	post	1	35	Yes	30_39	yes	yes	999	yes	not_too_far	yes	uuid:4fdb55fa-1707-42be-89d6-33423aad197a	Children_under_1					uuid:4fdb55fa-1707-42be-89d6-33423aad197a	action					uuid:4fdb55fa-1707-42be-89d6-33423aad197a	help_me					uuid:4fdb55fa-1707-42be-89d6-33423aad197a	unknown					uuid:4fdb55fa-1707-42be-89d6-33423aad197a
uuid:5041ac9b-8046-42c1-81af-6cbeacf994cb	yes	no	2	yes	yes	559	im		female	na	Primary	post	yes	post	3	26	Yes	18_29	yes	yes	999	no	close	yes	uuid:5041ac9b-8046-42c1-81af-6cbeacf994cb	pregnant					uuid:5041ac9b-8046-42c1-81af-6cbeacf994cb	na					uuid:5041ac9b-8046-42c1-81af-6cbeacf994cb	na_already_convinced					uuid:5041ac9b-8046-42c1-81af-6cbeacf994cb	unknown					uuid:5041ac9b-8046-42c1-81af-6cbeacf994cb
uuid:5055b1e2-a1f8-4903-8422-7138bd5527b8	yes	no	4	yes	yes	173	N m		male	na	No	post	no	post	999	48	Yes	40_49	yes	yes	999	no	close	yes	uuid:5055b1e2-a1f8-4903-8422-7138bd5527b8	Children_under_1					uuid:5055b1e2-a1f8-4903-8422-7138bd5527b8	na					uuid:5055b1e2-a1f8-4903-8422-7138bd5527b8	help_me					uuid:5055b1e2-a1f8-4903-8422-7138bd5527b8	unknown					uuid:5055b1e2-a1f8-4903-8422-7138bd5527b8
uuid:506417ef-ebe7-494f-8a85-61490eebfac9	na_not_aware_of_post	dk	5	yes	na	296	Ve		male	na	Some_secondary	na	no	na	0	33	Yes	30_39	yes	no	999	na	na_not_aware_post	no	uuid:506417ef-ebe7-494f-8a85-61490eebfac9	pregnant					uuid:506417ef-ebe7-494f-8a85-61490eebfac9	na					uuid:506417ef-ebe7-494f-8a85-61490eebfac9	help_me					uuid:506417ef-ebe7-494f-8a85-61490eebfac9	clean_water					uuid:506417ef-ebe7-494f-8a85-61490eebfac9
uuid:5064cb86-4230-4860-aaae-b597afbc4fae	yes	no	2	yes	yes	934	lj		female	na	Primary	post	yes	post	2	45	Yes	40_49	yes	yes	999	no	close	yes	uuid:5064cb86-4230-4860-aaae-b597afbc4fae	pregnant					uuid:5064cb86-4230-4860-aaae-b597afbc4fae	na					uuid:5064cb86-4230-4860-aaae-b597afbc4fae	na_already_convinced					uuid:5064cb86-4230-4860-aaae-b597afbc4fae	unknown					uuid:5064cb86-4230-4860-aaae-b597afbc4fae
uuid:50a791ea-bb85-4336-99b8-54bd496a7e9a	yes	no	3	yes	yes	721	Ja	Vth	male	1	Primary	post	no	post	2	57	Yes	50_59	yes	yes	999	no	close	yes	uuid:50a791ea-bb85-4336-99b8-54bd496a7e9a	dk					uuid:50a791ea-bb85-4336-99b8-54bd496a7e9a	na					uuid:50a791ea-bb85-4336-99b8-54bd496a7e9a	help_me					uuid:50a791ea-bb85-4336-99b8-54bd496a7e9a	iftreat					uuid:50a791ea-bb85-4336-99b8-54bd496a7e9a
uuid:50c96e19-3c26-4e06-aa12-065175c48f00	yes	no	2	yes	yes	970	jf		female	na	No	post	yes	post	2	45	Yes	40_49	yes	yes	999	yes	close	yes	uuid:50c96e19-3c26-4e06-aa12-065175c48f00	pregnant					uuid:50c96e19-3c26-4e06-aa12-065175c48f00	not_eat					uuid:50c96e19-3c26-4e06-aa12-065175c48f00	na_already_convinced					uuid:50c96e19-3c26-4e06-aa12-065175c48f00	unknown					uuid:50c96e19-3c26-4e06-aa12-065175c48f00
uuid:50cb4468-e35d-4407-9e20-761c9ec97440	dk	dk	2	yes	na	2849	fo		male	na	Primary	na	no	na	0	61	Yes	60_69	yes	na	999	na	dk	no	uuid:50cb4468-e35d-4407-9e20-761c9ec97440	pregnant					uuid:50cb4468-e35d-4407-9e20-761c9ec97440	na					uuid:50cb4468-e35d-4407-9e20-761c9ec97440	na_already_convinced					uuid:50cb4468-e35d-4407-9e20-761c9ec97440	unknown					uuid:50cb4468-e35d-4407-9e20-761c9ec97440
uuid:50cd52e8-1158-4991-97cd-4b22ac9dfd89	yes	no	1	yes	yes	577	Nc		female	na	Primary	post	yes	post	2	19	Yes	18_29	yes	yes	999	yes	not_too_far	yes	uuid:50cd52e8-1158-4991-97cd-4b22ac9dfd89	other					uuid:50cd52e8-1158-4991-97cd-4b22ac9dfd89	not_eat					uuid:50cd52e8-1158-4991-97cd-4b22ac9dfd89	na_already_convinced					uuid:50cd52e8-1158-4991-97cd-4b22ac9dfd89	clean_water					uuid:50cd52e8-1158-4991-97cd-4b22ac9dfd89
uuid:50d51ce8-78fe-40ad-bbee-6043eb6d6d42	na_not_aware_of_post	dk	4	yes	na	157	L d		female	na	No	na	no	na	999	50	No	50_59	no	na	999	na	na_not_aware_post	no	uuid:50d51ce8-78fe-40ad-bbee-6043eb6d6d42	dk					uuid:50d51ce8-78fe-40ad-bbee-6043eb6d6d42	na					uuid:50d51ce8-78fe-40ad-bbee-6043eb6d6d42	help_me					uuid:50d51ce8-78fe-40ad-bbee-6043eb6d6d42	n/a					uuid:50d51ce8-78fe-40ad-bbee-6043eb6d6d42
uuid:50e9c18f-bad9-4bda-ae23-40856ade4ed3	yes	no	5	yes	yes	2672	Lf		male	na	Some_secondary	school	yes	school	1	20	Yes	18_29	yes	yes	999	no	other	yes	uuid:50e9c18f-bad9-4bda-ae23-40856ade4ed3	pregnant					uuid:50e9c18f-bad9-4bda-ae23-40856ade4ed3	na					uuid:50e9c18f-bad9-4bda-ae23-40856ade4ed3	na_already_convinced					uuid:50e9c18f-bad9-4bda-ae23-40856ade4ed3	clean_water					uuid:50e9c18f-bad9-4bda-ae23-40856ade4ed3
uuid:50f82739-7c56-4774-8572-96f14460caee	yes	no	1	yes	na	285	Bd		female	na	Primary	home	yes	home	2	30	Yes	30_39	yes	yes	999	yes	other	yes	uuid:50f82739-7c56-4774-8572-96f14460caee	other					uuid:50f82739-7c56-4774-8572-96f14460caee	dk					uuid:50f82739-7c56-4774-8572-96f14460caee	na_already_convinced					uuid:50f82739-7c56-4774-8572-96f14460caee	clean_water					uuid:50f82739-7c56-4774-8572-96f14460caee
uuid:50fdf0ae-9da0-4475-adeb-ce4325cf0c51	na_not_aware_of_post	no	1	yes	na	7	Va		female	na	No	na	yes	na	1	20	Yes	18_29	yes	no	999	na	na_not_aware_post	no	uuid:50fdf0ae-9da0-4475-adeb-ce4325cf0c51	pregnant					uuid:50fdf0ae-9da0-4475-adeb-ce4325cf0c51	na					uuid:50fdf0ae-9da0-4475-adeb-ce4325cf0c51	help_me					uuid:50fdf0ae-9da0-4475-adeb-ce4325cf0c51	bednets					uuid:50fdf0ae-9da0-4475-adeb-ce4325cf0c51
uuid:516d4b6b-256e-4152-8a56-f35a6d84b88f	yes	no	3	yes	yes	860	Ff	Vdb	female	1	Primary	post	no	post	2	30	Yes	30_39	yes	yes	999	no	close	yes	uuid:516d4b6b-256e-4152-8a56-f35a6d84b88f	pregnant					uuid:516d4b6b-256e-4152-8a56-f35a6d84b88f	na					uuid:516d4b6b-256e-4152-8a56-f35a6d84b88f	help_me					uuid:516d4b6b-256e-4152-8a56-f35a6d84b88f	unknown					uuid:516d4b6b-256e-4152-8a56-f35a6d84b88f
uuid:51760782-86fe-4865-9a33-445075c11bb9	yes	no	5	yes	yes	407	Sd		male	na	Finish_primary	post	yes	post	2	23	Yes	18_29	yes	yes	999	yes	far	yes	uuid:51760782-86fe-4865-9a33-445075c11bb9	pregnant					uuid:51760782-86fe-4865-9a33-445075c11bb9	action					uuid:51760782-86fe-4865-9a33-445075c11bb9	help_me					uuid:51760782-86fe-4865-9a33-445075c11bb9	clean_water					uuid:51760782-86fe-4865-9a33-445075c11bb9
uuid:5182b7c0-6eb6-4c46-8d54-abd71d75b261	dk	dk	2	dk	na	307	jm		female	na	Some_secondary	na	yes	na	2	22	Yes	18_29	yes	na	999	na	dk	no	uuid:5182b7c0-6eb6-4c46-8d54-abd71d75b261	pregnant					uuid:5182b7c0-6eb6-4c46-8d54-abd71d75b261	na					uuid:5182b7c0-6eb6-4c46-8d54-abd71d75b261	uk					uuid:5182b7c0-6eb6-4c46-8d54-abd71d75b261	unknown					uuid:5182b7c0-6eb6-4c46-8d54-abd71d75b261
uuid:51f122df-3398-4948-a0a6-03535a676efc	yes	no	1	yes	yes	20	Asj		male	na	Some_secondary	post	yes	post	2	28	Yes	18_29	yes	yes	999	no	not_too_far	yes	uuid:51f122df-3398-4948-a0a6-03535a676efc	pregnant					uuid:51f122df-3398-4948-a0a6-03535a676efc	na					uuid:51f122df-3398-4948-a0a6-03535a676efc	na_already_convinced					uuid:51f122df-3398-4948-a0a6-03535a676efc	iftreat					uuid:51f122df-3398-4948-a0a6-03535a676efc
uuid:5238100a-a75a-4e75-98bd-cf2389b67cdc	other	dk	5	yes	yes	1025	Ic		female	na	No	home	yes	home	3	110	DK	100+	no	yes	999	no	dk	yes	uuid:5238100a-a75a-4e75-98bd-cf2389b67cdc	dk					uuid:5238100a-a75a-4e75-98bd-cf2389b67cdc	na					uuid:5238100a-a75a-4e75-98bd-cf2389b67cdc	uk					uuid:5238100a-a75a-4e75-98bd-cf2389b67cdc	n/a					uuid:5238100a-a75a-4e75-98bd-cf2389b67cdc
uuid:5262ad45-401e-43b6-8cf3-e46e4295096f	na_not_aware_of_post	dk	4	dk	na	2500	C.d	Gg	female	na	Primary	na	no	na	999	20	No	18_29	yes	no	999	na	dk	no	uuid:5262ad45-401e-43b6-8cf3-e46e4295096f	dk					uuid:5262ad45-401e-43b6-8cf3-e46e4295096f	na					uuid:5262ad45-401e-43b6-8cf3-e46e4295096f	help_family					uuid:5262ad45-401e-43b6-8cf3-e46e4295096f	unknown					uuid:5262ad45-401e-43b6-8cf3-e46e4295096f
uuid:5278992b-b0a4-4ff4-9462-1da465355548	yes	no	1	yes	yes	260	Jp		male	na	No	post	yes	post	1	999	Yes	40_49	yes	yes	999	no	not_too_far	yes	uuid:5278992b-b0a4-4ff4-9462-1da465355548	other					uuid:5278992b-b0a4-4ff4-9462-1da465355548	na					uuid:5278992b-b0a4-4ff4-9462-1da465355548	na_already_convinced					uuid:5278992b-b0a4-4ff4-9462-1da465355548	iftreat					uuid:5278992b-b0a4-4ff4-9462-1da465355548
uuid:52a029b9-5458-4d8f-bffb-8cab446415b3	yes	no	2	yes	yes	84	jc		male	na	Primary	post	yes	post	2	65	Yes	60_69	yes	no	999	no	close	yes	uuid:52a029b9-5458-4d8f-bffb-8cab446415b3	Children_unk					uuid:52a029b9-5458-4d8f-bffb-8cab446415b3	na					uuid:52a029b9-5458-4d8f-bffb-8cab446415b3	uk					uuid:52a029b9-5458-4d8f-bffb-8cab446415b3	clean_water					uuid:52a029b9-5458-4d8f-bffb-8cab446415b3
uuid:52d34293-1112-47b5-8442-f9a6b4cc8b16	yes	no	1	yes	yes	2666	sf		female	na	Some_secondary	school	yes	school	2	18	Yes	18_29	yes	yes	999	no	not_too_far	yes	uuid:52d34293-1112-47b5-8442-f9a6b4cc8b16	pregnant					uuid:52d34293-1112-47b5-8442-f9a6b4cc8b16	na					uuid:52d34293-1112-47b5-8442-f9a6b4cc8b16	na_already_convinced					uuid:52d34293-1112-47b5-8442-f9a6b4cc8b16	clean_water					uuid:52d34293-1112-47b5-8442-f9a6b4cc8b16
uuid:52df9812-5a08-4f8e-99da-4f03e9bcf2e3	na_not_aware_of_post	no	1	yes	na	2625	Jce		female	na	Primary	na	yes	na	1	42	Yes	40_49	yes	no	999	na	na_not_aware_post	no	uuid:52df9812-5a08-4f8e-99da-4f03e9bcf2e3	pregnant					uuid:52df9812-5a08-4f8e-99da-4f03e9bcf2e3	na					uuid:52df9812-5a08-4f8e-99da-4f03e9bcf2e3	na_already_convinced					uuid:52df9812-5a08-4f8e-99da-4f03e9bcf2e3	iftreat					uuid:52df9812-5a08-4f8e-99da-4f03e9bcf2e3
uuid:52e31db8-4839-452d-b9b1-8df0316be431	dk	dk	4	yes	na	185	C a		male	na	Some_secondary	na	yes	na	1	28	Yes	18_29	yes	na	999	na	dk	no	uuid:52e31db8-4839-452d-b9b1-8df0316be431	pregnant					uuid:52e31db8-4839-452d-b9b1-8df0316be431	na					uuid:52e31db8-4839-452d-b9b1-8df0316be431	help_me					uuid:52e31db8-4839-452d-b9b1-8df0316be431	unknown					uuid:52e31db8-4839-452d-b9b1-8df0316be431
uuid:52fdda30-122f-48ff-ba72-b79b6074a921	yes	no	2	yes	yes	2777	gv		male	na	No	post	yes	post	1	79	Yes	70_79	yes	yes	999	no	close	yes	uuid:52fdda30-122f-48ff-ba72-b79b6074a921	dk					uuid:52fdda30-122f-48ff-ba72-b79b6074a921	na					uuid:52fdda30-122f-48ff-ba72-b79b6074a921	uk					uuid:52fdda30-122f-48ff-ba72-b79b6074a921	unknown					uuid:52fdda30-122f-48ff-ba72-b79b6074a921
uuid:5346e224-5d71-4408-a8b1-ad2d5edc2f39	yes	no	3	yes	yes	110	Cp	Vf	male	1	Finish_secondary	post	yes	post	3	25	Yes	18_29	yes	yes	999	no	not_too_far	yes	uuid:5346e224-5d71-4408-a8b1-ad2d5edc2f39	pregnant					uuid:5346e224-5d71-4408-a8b1-ad2d5edc2f39	na					uuid:5346e224-5d71-4408-a8b1-ad2d5edc2f39	help_me					uuid:5346e224-5d71-4408-a8b1-ad2d5edc2f39	iftreat					uuid:5346e224-5d71-4408-a8b1-ad2d5edc2f39
uuid:53517b9e-dd2b-43c8-b687-890f05773af2	yes	no	1	yes	na	2802	nd		female	na	Some_secondary	na	no	na	0	19	Yes	18_29	yes	na	999	na	not_too_far	no	uuid:53517b9e-dd2b-43c8-b687-890f05773af2	pregnant					uuid:53517b9e-dd2b-43c8-b687-890f05773af2	na					uuid:53517b9e-dd2b-43c8-b687-890f05773af2	na_already_convinced					uuid:53517b9e-dd2b-43c8-b687-890f05773af2	unknown					uuid:53517b9e-dd2b-43c8-b687-890f05773af2
uuid:5379dbc1-8c27-4fdd-855a-c2f914479798	yes	no	2	yes	yes	2758	je		female	na	Some_secondary	post	yes	post	3	27	Yes	18_29	yes	yes	999	yes	close	yes	uuid:5379dbc1-8c27-4fdd-855a-c2f914479798	pregnant					uuid:5379dbc1-8c27-4fdd-855a-c2f914479798	dk					uuid:5379dbc1-8c27-4fdd-855a-c2f914479798	na_already_convinced					uuid:5379dbc1-8c27-4fdd-855a-c2f914479798	unknown					uuid:5379dbc1-8c27-4fdd-855a-c2f914479798
uuid:53bac82f-32cd-4de0-a00c-8bcb16d114f0	dk	dk	2	yes	na	81	yp		female	na	Some_secondary	na	yes	na	3	29	Yes	18_29	yes	na	1	na	dk	no	uuid:53bac82f-32cd-4de0-a00c-8bcb16d114f0	pregnant					uuid:53bac82f-32cd-4de0-a00c-8bcb16d114f0	na					uuid:53bac82f-32cd-4de0-a00c-8bcb16d114f0	uk					uuid:53bac82f-32cd-4de0-a00c-8bcb16d114f0	unknown					uuid:53bac82f-32cd-4de0-a00c-8bcb16d114f0
uuid:53de250d-dd99-4ac6-b892-0966d6e49dbd	yes	no	1	yes	yes	271	Cb		male	na	Primary	post	yes	post	2	48	Yes	40_49	yes	yes	5	no	close	yes	uuid:53de250d-dd99-4ac6-b892-0966d6e49dbd	pregnant					uuid:53de250d-dd99-4ac6-b892-0966d6e49dbd	na					uuid:53de250d-dd99-4ac6-b892-0966d6e49dbd	na_already_convinced					uuid:53de250d-dd99-4ac6-b892-0966d6e49dbd	iftreat					uuid:53de250d-dd99-4ac6-b892-0966d6e49dbd
uuid:53ea275e-2e73-411e-86f5-da7389652ba2	yes	no	5	yes	yes	201	Og		female	na	Primary	post	yes	post	2	24	Yes	18_29	yes	yes	999	yes	close	yes	uuid:53ea275e-2e73-411e-86f5-da7389652ba2	pregnant					uuid:53ea275e-2e73-411e-86f5-da7389652ba2	dk					uuid:53ea275e-2e73-411e-86f5-da7389652ba2	help_me					uuid:53ea275e-2e73-411e-86f5-da7389652ba2	bednets					uuid:53ea275e-2e73-411e-86f5-da7389652ba2
uuid:5442e641-c1a2-453e-a1ac-550265d981e2	yes	no	5	yes	yes	423	Ef		female	na	Some_secondary	post	yes	post	2	29	Yes	18_29	yes	yes	999	no	close	yes	uuid:5442e641-c1a2-453e-a1ac-550265d981e2	pregnant					uuid:5442e641-c1a2-453e-a1ac-550265d981e2	na					uuid:5442e641-c1a2-453e-a1ac-550265d981e2	na_already_convinced					uuid:5442e641-c1a2-453e-a1ac-550265d981e2	clean_water					uuid:5442e641-c1a2-453e-a1ac-550265d981e2
uuid:5455f735-6007-46ee-b391-2ec47c711635	yes	no	3	yes	yes	132	Lj	Gdg	female	1	No	post	yes	post	3	52	Yes	50_59	yes	yes	999	no	not_too_far	yes	uuid:5455f735-6007-46ee-b391-2ec47c711635	pregnant					uuid:5455f735-6007-46ee-b391-2ec47c711635	na					uuid:5455f735-6007-46ee-b391-2ec47c711635	help_family					uuid:5455f735-6007-46ee-b391-2ec47c711635	unknown					uuid:5455f735-6007-46ee-b391-2ec47c711635
uuid:54585303-254b-4049-ac7f-a42172887f35	yes	no	5	yes	no	312	Cf		male	na	Finish_primary	post	yes	post	3	45	Yes	40_49	yes	yes	999	no	close	yes	uuid:54585303-254b-4049-ac7f-a42172887f35	pregnant					uuid:54585303-254b-4049-ac7f-a42172887f35	na					uuid:54585303-254b-4049-ac7f-a42172887f35	na_already_convinced					uuid:54585303-254b-4049-ac7f-a42172887f35	bednets					uuid:54585303-254b-4049-ac7f-a42172887f35
uuid:547410cb-4ce9-4054-8749-95c3a75de941	yes	no	4	yes	yes	154	R d		male	na	Finish_primary	post	no	post	999	27	Yes	18_29	yes	yes	999	no	far	yes	uuid:547410cb-4ce9-4054-8749-95c3a75de941	pregnant					uuid:547410cb-4ce9-4054-8749-95c3a75de941	na					uuid:547410cb-4ce9-4054-8749-95c3a75de941	help_family					uuid:547410cb-4ce9-4054-8749-95c3a75de941	unknown					uuid:547410cb-4ce9-4054-8749-95c3a75de941
uuid:54a7efb8-63f3-4bc8-b1d4-54e36f47d894	yes	no	1	dk	yes	18	So	H	female	na	Primary	post	yes	post	2	25	Yes	18_29	yes	yes	999	yes	not_too_far	yes	uuid:54a7efb8-63f3-4bc8-b1d4-54e36f47d894	pregnant					uuid:54a7efb8-63f3-4bc8-b1d4-54e36f47d894	dk					uuid:54a7efb8-63f3-4bc8-b1d4-54e36f47d894	side_effect					uuid:54a7efb8-63f3-4bc8-b1d4-54e36f47d894	clean_water					uuid:54a7efb8-63f3-4bc8-b1d4-54e36f47d894
uuid:54d10624-1916-46d8-bc68-c8fd5f839ef8	dk	dk	2	yes	na	549	dp		female	na	Primary	na	yes	na	3	25	Yes	18_29	yes	na	999	na	dk	no	uuid:54d10624-1916-46d8-bc68-c8fd5f839ef8	pregnant					uuid:54d10624-1916-46d8-bc68-c8fd5f839ef8	na					uuid:54d10624-1916-46d8-bc68-c8fd5f839ef8	na_already_convinced					uuid:54d10624-1916-46d8-bc68-c8fd5f839ef8	unknown					uuid:54d10624-1916-46d8-bc68-c8fd5f839ef8
uuid:5508bfee-c78d-413a-89cb-f7edd62fdb59	dk	dk	3	yes	yes	118	Ee	Shg	male	dk	Finish_primary	post	yes	post	3	47	Yes	40_49	yes	yes	999	no	far	yes	uuid:5508bfee-c78d-413a-89cb-f7edd62fdb59	pregnant					uuid:5508bfee-c78d-413a-89cb-f7edd62fdb59	na					uuid:5508bfee-c78d-413a-89cb-f7edd62fdb59	side_effect					uuid:5508bfee-c78d-413a-89cb-f7edd62fdb59	iftreat					uuid:5508bfee-c78d-413a-89cb-f7edd62fdb59
uuid:552b0715-516f-49fd-90a4-d24111faedd0	yes	yes	4	yes	yes	2740	fb	er	male	na	Primary	post	dk	post	3	40	Yes	40_49	yes	yes	999	no	close	yes	uuid:552b0715-516f-49fd-90a4-d24111faedd0	pregnant					uuid:552b0715-516f-49fd-90a4-d24111faedd0	na					uuid:552b0715-516f-49fd-90a4-d24111faedd0	help_me					uuid:552b0715-516f-49fd-90a4-d24111faedd0	n/a					uuid:552b0715-516f-49fd-90a4-d24111faedd0
uuid:552f6a0f-14d1-4e21-a496-cecee7f67b1c	yes	no	3	yes	yes	105	Ac	Bfhd	female	1	No	post	yes	post	3	45	Yes	40_49	yes	yes	999	no	not_too_far	yes	uuid:552f6a0f-14d1-4e21-a496-cecee7f67b1c	Children_unk					uuid:552f6a0f-14d1-4e21-a496-cecee7f67b1c	na					uuid:552f6a0f-14d1-4e21-a496-cecee7f67b1c	side_effect					uuid:552f6a0f-14d1-4e21-a496-cecee7f67b1c	unknown					uuid:552f6a0f-14d1-4e21-a496-cecee7f67b1c
uuid:556a2117-ad0f-4528-aa21-3c9baf04d9c0	yes	no	2	yes	yes	927	ga		female	na	Some_secondary	post	yes	post	3	32	Yes	30_39	yes	yes	1	no	close	yes	uuid:556a2117-ad0f-4528-aa21-3c9baf04d9c0	pregnant					uuid:556a2117-ad0f-4528-aa21-3c9baf04d9c0	na					uuid:556a2117-ad0f-4528-aa21-3c9baf04d9c0	uk					uuid:556a2117-ad0f-4528-aa21-3c9baf04d9c0	clean_water					uuid:556a2117-ad0f-4528-aa21-3c9baf04d9c0
uuid:5588ce58-324b-4096-bb0b-ffc4c2a2586b	yes	no	1	yes	na	2619	ap		female	na	No	home	yes	home	2	35	Yes	30_39	yes	yes	999	no	not_too_far	yes	uuid:5588ce58-324b-4096-bb0b-ffc4c2a2586b	pregnant					uuid:5588ce58-324b-4096-bb0b-ffc4c2a2586b	na					uuid:5588ce58-324b-4096-bb0b-ffc4c2a2586b	na_already_convinced					uuid:5588ce58-324b-4096-bb0b-ffc4c2a2586b	unknown					uuid:5588ce58-324b-4096-bb0b-ffc4c2a2586b
uuid:55b55739-8af4-42f1-8bf4-a8c93a5f8c0a	yes	no	2	yes	yes	2856	cj		female	na	Some_secondary	post	yes	post	3	19	Yes	18_29	yes	yes	999	yes	close	yes	uuid:55b55739-8af4-42f1-8bf4-a8c93a5f8c0a	pregnant					uuid:55b55739-8af4-42f1-8bf4-a8c93a5f8c0a	dk					uuid:55b55739-8af4-42f1-8bf4-a8c93a5f8c0a	na_already_convinced					uuid:55b55739-8af4-42f1-8bf4-a8c93a5f8c0a	clean_water					uuid:55b55739-8af4-42f1-8bf4-a8c93a5f8c0a
uuid:55fda3af-712f-4afc-92a0-a3794ac23f71	yes	no	1	yes	yes	287	Im		female	na	Some_secondary	school	yes	school	2	25	Yes	18_29	yes	yes	999	yes	na_not_aware_post	yes	uuid:55fda3af-712f-4afc-92a0-a3794ac23f71	pregnant					uuid:55fda3af-712f-4afc-92a0-a3794ac23f71	dk					uuid:55fda3af-712f-4afc-92a0-a3794ac23f71	na_already_convinced					uuid:55fda3af-712f-4afc-92a0-a3794ac23f71	clean_water					uuid:55fda3af-712f-4afc-92a0-a3794ac23f71
uuid:56084521-c9bb-4d21-834a-7992cd54ebd3	yes	no	2	yes	yes	64	mj		female	na	Some_secondary	post	yes	post	2	29	Yes	18_29	yes	yes	999	no	not_too_far	yes	uuid:56084521-c9bb-4d21-834a-7992cd54ebd3	pregnant					uuid:56084521-c9bb-4d21-834a-7992cd54ebd3	na					uuid:56084521-c9bb-4d21-834a-7992cd54ebd3	uk					uuid:56084521-c9bb-4d21-834a-7992cd54ebd3	bednets					uuid:56084521-c9bb-4d21-834a-7992cd54ebd3
uuid:562b54dd-4d0d-4ed5-bdbb-0372207e8d17	yes	no	2	yes	yes	343	ss		female	na	Some_secondary	post	yes	post	2	32	Yes	30_39	yes	yes	999	yes	close	yes	uuid:562b54dd-4d0d-4ed5-bdbb-0372207e8d17	pregnant					uuid:562b54dd-4d0d-4ed5-bdbb-0372207e8d17	dk					uuid:562b54dd-4d0d-4ed5-bdbb-0372207e8d17	na_already_convinced					uuid:562b54dd-4d0d-4ed5-bdbb-0372207e8d17	clean_water					uuid:562b54dd-4d0d-4ed5-bdbb-0372207e8d17
uuid:5642748f-8950-4bf6-9ee5-beef6114155a	yes	no	5	yes	yes	299	Js		male	na	Primary	post	yes	post	3	26	Yes	18_29	yes	yes	999	no	close	yes	uuid:5642748f-8950-4bf6-9ee5-beef6114155a	pregnant					uuid:5642748f-8950-4bf6-9ee5-beef6114155a	na					uuid:5642748f-8950-4bf6-9ee5-beef6114155a	side_effect					uuid:5642748f-8950-4bf6-9ee5-beef6114155a	clean_water					uuid:5642748f-8950-4bf6-9ee5-beef6114155a
uuid:564a8323-77a6-4690-883f-0a129e0a244e	yes	no	5	yes	yes	1023	Jn		male	na	Primary	post	yes	post	3	20	Yes	18_29	no	yes	999	no	close	yes	uuid:564a8323-77a6-4690-883f-0a129e0a244e	dk					uuid:564a8323-77a6-4690-883f-0a129e0a244e	na					uuid:564a8323-77a6-4690-883f-0a129e0a244e	na_already_convinced					uuid:564a8323-77a6-4690-883f-0a129e0a244e	n/a					uuid:564a8323-77a6-4690-883f-0a129e0a244e
uuid:56544ee7-fd01-42ad-9915-8763da66d3d1	yes	no	1	yes	no	2817	Lfa		female	na	No	home	yes	post	999	79	Yes	70_79	yes	yes	999	no	close	yes	uuid:56544ee7-fd01-42ad-9915-8763da66d3d1	dk					uuid:56544ee7-fd01-42ad-9915-8763da66d3d1	na					uuid:56544ee7-fd01-42ad-9915-8763da66d3d1	na_already_convinced					uuid:56544ee7-fd01-42ad-9915-8763da66d3d1	iftreat					uuid:56544ee7-fd01-42ad-9915-8763da66d3d1
uuid:5668d36b-c843-4261-889a-f223cdaf145f	yes	no	5	yes	yes	401	oj		male	na	No	home	yes	post	1	45	Yes	40_49	no	yes	999	no	other	yes	uuid:5668d36b-c843-4261-889a-f223cdaf145f	dk					uuid:5668d36b-c843-4261-889a-f223cdaf145f	na					uuid:5668d36b-c843-4261-889a-f223cdaf145f	uk					uuid:5668d36b-c843-4261-889a-f223cdaf145f	n/a					uuid:5668d36b-c843-4261-889a-f223cdaf145f
uuid:566bd84a-b1f0-4245-a493-9eb8ae3d7c80	yes	no	4	yes	yes	165	A o		female	na	Some_secondary	post	yes	post	2	46	Yes	40_49	yes	yes	999	no	not_too_far	yes	uuid:566bd84a-b1f0-4245-a493-9eb8ae3d7c80	pregnant					uuid:566bd84a-b1f0-4245-a493-9eb8ae3d7c80	na					uuid:566bd84a-b1f0-4245-a493-9eb8ae3d7c80	help_me					uuid:566bd84a-b1f0-4245-a493-9eb8ae3d7c80	mosquito					uuid:566bd84a-b1f0-4245-a493-9eb8ae3d7c80
uuid:5693eda2-0246-46d3-8a16-9d00780ce863	yes	no	4	yes	yes	370	A.p	Ugf	female	na	No	post	yes	post	3	27	Yes	18_29	yes	yes	999	no	close	yes	uuid:5693eda2-0246-46d3-8a16-9d00780ce863	pregnant					uuid:5693eda2-0246-46d3-8a16-9d00780ce863	na					uuid:5693eda2-0246-46d3-8a16-9d00780ce863	other					uuid:5693eda2-0246-46d3-8a16-9d00780ce863	mosquito					uuid:5693eda2-0246-46d3-8a16-9d00780ce863
uuid:56afc904-8994-4158-9db6-68b7037b9b3a	yes	no	4	yes	yes	196	D l		female	na	Finish_secondary	post	yes	post	2	24	Yes	18_29	yes	yes	999	no	close	yes	uuid:56afc904-8994-4158-9db6-68b7037b9b3a	pregnant					uuid:56afc904-8994-4158-9db6-68b7037b9b3a	na					uuid:56afc904-8994-4158-9db6-68b7037b9b3a	help_family					uuid:56afc904-8994-4158-9db6-68b7037b9b3a	unknown					uuid:56afc904-8994-4158-9db6-68b7037b9b3a
uuid:56f1a4c5-baa7-40ec-867a-db6d8cff9b0f	yes	no	1	yes	yes	2612	Cd		female	na	Primary	post	yes	post	1	35	Yes	30_39	yes	yes	999	yes	not_too_far	yes	uuid:56f1a4c5-baa7-40ec-867a-db6d8cff9b0f	pregnant					uuid:56f1a4c5-baa7-40ec-867a-db6d8cff9b0f	action					uuid:56f1a4c5-baa7-40ec-867a-db6d8cff9b0f	na_already_convinced					uuid:56f1a4c5-baa7-40ec-867a-db6d8cff9b0f	iftreat					uuid:56f1a4c5-baa7-40ec-867a-db6d8cff9b0f
uuid:56fb9ea7-a3ba-4c1c-ae2b-c10d6d1538f7	yes	no	5	yes	yes	2720	Mp		female	na	Some_secondary	school	yes	school	2	18	Yes	18_29	yes	yes	999	no	other	yes	uuid:56fb9ea7-a3ba-4c1c-ae2b-c10d6d1538f7	pregnant					uuid:56fb9ea7-a3ba-4c1c-ae2b-c10d6d1538f7	na					uuid:56fb9ea7-a3ba-4c1c-ae2b-c10d6d1538f7	na_already_convinced					uuid:56fb9ea7-a3ba-4c1c-ae2b-c10d6d1538f7	iftreat					uuid:56fb9ea7-a3ba-4c1c-ae2b-c10d6d1538f7
uuid:5702a64f-f809-417a-9f57-b220671afbe1	yes	no	2	yes	yes	77	dv		female	na	Some_secondary	post	yes	post	2	41	Yes	40_49	yes	yes	999	no	close	yes	uuid:5702a64f-f809-417a-9f57-b220671afbe1	pregnant					uuid:5702a64f-f809-417a-9f57-b220671afbe1	na					uuid:5702a64f-f809-417a-9f57-b220671afbe1	uk					uuid:5702a64f-f809-417a-9f57-b220671afbe1	unknown					uuid:5702a64f-f809-417a-9f57-b220671afbe1
uuid:57049c1a-b3e6-4172-85d3-11280f2de2be	yes	no	5	yes	yes	1065	Vd		female	na	No	post	yes	post	3	25	Yes	18_29	no	yes	999	no	close	yes	uuid:57049c1a-b3e6-4172-85d3-11280f2de2be	dk					uuid:57049c1a-b3e6-4172-85d3-11280f2de2be	na					uuid:57049c1a-b3e6-4172-85d3-11280f2de2be	help_me					uuid:57049c1a-b3e6-4172-85d3-11280f2de2be	n/a					uuid:57049c1a-b3e6-4172-85d3-11280f2de2be
uuid:5735554d-8bae-4c8d-a50b-b4264fb098a7	yes	no	4	yes	yes	182	Z p		female	na	No	post	yes	post	1	46	Yes	40_49	yes	yes	999	no	close	yes	uuid:5735554d-8bae-4c8d-a50b-b4264fb098a7	pregnant					uuid:5735554d-8bae-4c8d-a50b-b4264fb098a7	na					uuid:5735554d-8bae-4c8d-a50b-b4264fb098a7	uk					uuid:5735554d-8bae-4c8d-a50b-b4264fb098a7	unknown					uuid:5735554d-8bae-4c8d-a50b-b4264fb098a7
uuid:57516b06-ee39-495e-bc42-9687472865dc	yes	no	1	yes	yes	35	Ml		female	na	Primary	post	no	post	0	47	Yes	40_49	yes	yes	999	no	close	yes	uuid:57516b06-ee39-495e-bc42-9687472865dc	pregnant					uuid:57516b06-ee39-495e-bc42-9687472865dc	na					uuid:57516b06-ee39-495e-bc42-9687472865dc	na_already_convinced					uuid:57516b06-ee39-495e-bc42-9687472865dc	clean_water					uuid:57516b06-ee39-495e-bc42-9687472865dc
uuid:5755c714-d676-4f2a-a084-c655662dbdc7	dk	dk	2	yes	na	59	lf	d4 li pat bwe medicament paske li te gentan fini.	male	na	Some_secondary	na	no	na	999	18	Yes	18_29	yes	na	999	na	dk	no	uuid:5755c714-d676-4f2a-a084-c655662dbdc7	pregnant					uuid:5755c714-d676-4f2a-a084-c655662dbdc7	na					uuid:5755c714-d676-4f2a-a084-c655662dbdc7	uk					uuid:5755c714-d676-4f2a-a084-c655662dbdc7	clean_water					uuid:5755c714-d676-4f2a-a084-c655662dbdc7
uuid:575a6a7a-86d1-409e-a1e7-3c49a732bd07	dk	dk	2	yes	na	2853	ll		female	na	No	na	no	na	0	65	Yes	60_69	yes	na	999	na	dk	no	uuid:575a6a7a-86d1-409e-a1e7-3c49a732bd07	dk					uuid:575a6a7a-86d1-409e-a1e7-3c49a732bd07	na					uuid:575a6a7a-86d1-409e-a1e7-3c49a732bd07	na_already_convinced					uuid:575a6a7a-86d1-409e-a1e7-3c49a732bd07	unknown					uuid:575a6a7a-86d1-409e-a1e7-3c49a732bd07
uuid:578c0897-3dfc-420d-88db-4eee1045d922	yes	no	2	yes	yes	928	nc		female	na	Primary	post	yes	post	1	42	Yes	40_49	yes	yes	999	yes	close	yes	uuid:578c0897-3dfc-420d-88db-4eee1045d922	pregnant					uuid:578c0897-3dfc-420d-88db-4eee1045d922	dk					uuid:578c0897-3dfc-420d-88db-4eee1045d922	uk					uuid:578c0897-3dfc-420d-88db-4eee1045d922	unknown					uuid:578c0897-3dfc-420d-88db-4eee1045d922
uuid:579ba11d-ebf8-4ea9-b6a6-b336a4c4783b	yes	no	1	other	yes	40	Cd		male	na	Some_secondary	post	no	post	999	28	Yes	18_29	yes	yes	999	no	close	yes	uuid:579ba11d-ebf8-4ea9-b6a6-b336a4c4783b	pregnant					uuid:579ba11d-ebf8-4ea9-b6a6-b336a4c4783b	na					uuid:579ba11d-ebf8-4ea9-b6a6-b336a4c4783b	na_already_convinced					uuid:579ba11d-ebf8-4ea9-b6a6-b336a4c4783b	iftreat					uuid:579ba11d-ebf8-4ea9-b6a6-b336a4c4783b
uuid:57a148f9-88b1-4730-a4f6-ba84415a282b	yes	no	4	yes	yes	181	L p		male	na	No	post	yes	post	2	56	Yes	50_59	yes	yes	999	no	close	yes	uuid:57a148f9-88b1-4730-a4f6-ba84415a282b	pregnant					uuid:57a148f9-88b1-4730-a4f6-ba84415a282b	na					uuid:57a148f9-88b1-4730-a4f6-ba84415a282b	help_family					uuid:57a148f9-88b1-4730-a4f6-ba84415a282b	clean_water					uuid:57a148f9-88b1-4730-a4f6-ba84415a282b
uuid:57bf186a-d48f-4e80-ba58-f91e631fb0e2	other	dk	5	yes	na	266	Ls		female	na	Some_secondary	na	no	na	0	19	Yes	18_29	yes	no	999	na	other	yes	uuid:57bf186a-d48f-4e80-ba58-f91e631fb0e2	pregnant					uuid:57bf186a-d48f-4e80-ba58-f91e631fb0e2	na					uuid:57bf186a-d48f-4e80-ba58-f91e631fb0e2	help_me					uuid:57bf186a-d48f-4e80-ba58-f91e631fb0e2	unknown					uuid:57bf186a-d48f-4e80-ba58-f91e631fb0e2
uuid:57c4ce8f-4fcd-40d9-8091-3965a3db9f7f	yes	no	2	yes	yes	556	rg		female	na	No	post	yes	post	2	54	Yes	50_59	yes	yes	999	no	close	yes	uuid:57c4ce8f-4fcd-40d9-8091-3965a3db9f7f	pregnant					uuid:57c4ce8f-4fcd-40d9-8091-3965a3db9f7f	na					uuid:57c4ce8f-4fcd-40d9-8091-3965a3db9f7f	na_already_convinced					uuid:57c4ce8f-4fcd-40d9-8091-3965a3db9f7f	unknown					uuid:57c4ce8f-4fcd-40d9-8091-3965a3db9f7f
uuid:57d6ab93-2ee6-4d91-94f2-8d6aed08aaf2	yes	no	3	yes	yes	101	Sd	Bdy	female	1	Primary	post	yes	post	3	45	Yes	40_49	yes	yes	999	yes	not_too_far	yes	uuid:57d6ab93-2ee6-4d91-94f2-8d6aed08aaf2	pregnant					uuid:57d6ab93-2ee6-4d91-94f2-8d6aed08aaf2	dk					uuid:57d6ab93-2ee6-4d91-94f2-8d6aed08aaf2	side_effect					uuid:57d6ab93-2ee6-4d91-94f2-8d6aed08aaf2	unknown					uuid:57d6ab93-2ee6-4d91-94f2-8d6aed08aaf2
uuid:57f6829a-43e3-429d-a939-7dad5a8c0b04	yes	no	5	yes	yes	1052	Mf		female	na	No	post	yes	post	2	40	Yes	40_49	yes	yes	999	no	close	yes	uuid:57f6829a-43e3-429d-a939-7dad5a8c0b04	pregnant					uuid:57f6829a-43e3-429d-a939-7dad5a8c0b04	na					uuid:57f6829a-43e3-429d-a939-7dad5a8c0b04	na_already_convinced					uuid:57f6829a-43e3-429d-a939-7dad5a8c0b04	clean_water					uuid:57f6829a-43e3-429d-a939-7dad5a8c0b04
uuid:581cc78b-5d02-4419-8ae3-93e49cf8cb40	yes	no	5	yes	yes	2704	De	Oj	male	na	No	post	no	post	1	78	Yes	70_79	yes	yes	1	no	not_too_far	yes	uuid:581cc78b-5d02-4419-8ae3-93e49cf8cb40	pregnant					uuid:581cc78b-5d02-4419-8ae3-93e49cf8cb40	na					uuid:581cc78b-5d02-4419-8ae3-93e49cf8cb40	uk					uuid:581cc78b-5d02-4419-8ae3-93e49cf8cb40	clean_water					uuid:581cc78b-5d02-4419-8ae3-93e49cf8cb40
uuid:5825a0f2-c4fa-4640-8228-ec5fc711be9d	yes	no	5	yes	yes	234	Sp		female	na	Primary	post	yes	post	2	33	Yes	30_39	no	yes	999	no	not_too_far	yes	uuid:5825a0f2-c4fa-4640-8228-ec5fc711be9d	dk					uuid:5825a0f2-c4fa-4640-8228-ec5fc711be9d	na					uuid:5825a0f2-c4fa-4640-8228-ec5fc711be9d	side_effect					uuid:5825a0f2-c4fa-4640-8228-ec5fc711be9d	n/a					uuid:5825a0f2-c4fa-4640-8228-ec5fc711be9d
uuid:58275910-6ca6-4249-b283-735216a71f1d	yes	no	1	yes	na	2622	vd		female	na	No	home	yes	home	1	43	Yes	40_49	yes	yes	999	yes	dk	yes	uuid:58275910-6ca6-4249-b283-735216a71f1d	pregnant					uuid:58275910-6ca6-4249-b283-735216a71f1d	action					uuid:58275910-6ca6-4249-b283-735216a71f1d	na_already_convinced					uuid:58275910-6ca6-4249-b283-735216a71f1d	iftreat					uuid:58275910-6ca6-4249-b283-735216a71f1d
uuid:5831c254-2326-4e0c-b710-5455c6a78ecd	dk	dk	3	yes	dk	856	Cj	Bgbe	female	dk	No	home	no	home	2	26	Yes	18_29	yes	yes	999	no	dk	yes	uuid:5831c254-2326-4e0c-b710-5455c6a78ecd	pregnant					uuid:5831c254-2326-4e0c-b710-5455c6a78ecd	na					uuid:5831c254-2326-4e0c-b710-5455c6a78ecd	help_me					uuid:5831c254-2326-4e0c-b710-5455c6a78ecd	iftreat					uuid:5831c254-2326-4e0c-b710-5455c6a78ecd
uuid:58d126ec-1f1b-457a-a3c7-4150d7a1c243	dk	dk	2	yes	na	55	ld		female	na	Some_secondary	na	dk	na	999	40	Yes	40_49	yes	na	1	na	dk	no	uuid:58d126ec-1f1b-457a-a3c7-4150d7a1c243	pregnant					uuid:58d126ec-1f1b-457a-a3c7-4150d7a1c243	na					uuid:58d126ec-1f1b-457a-a3c7-4150d7a1c243	uk					uuid:58d126ec-1f1b-457a-a3c7-4150d7a1c243	clean_water					uuid:58d126ec-1f1b-457a-a3c7-4150d7a1c243
uuid:58d1f176-844f-4116-a61e-b40dc859539f	yes	no	1	yes	yes	2617	Mf		male	na	Primary	post	yes	post	1	55	Yes	50_59	yes	yes	999	yes	close	yes	uuid:58d1f176-844f-4116-a61e-b40dc859539f	pregnant					uuid:58d1f176-844f-4116-a61e-b40dc859539f	dk					uuid:58d1f176-844f-4116-a61e-b40dc859539f	na_already_convinced					uuid:58d1f176-844f-4116-a61e-b40dc859539f	unknown					uuid:58d1f176-844f-4116-a61e-b40dc859539f
uuid:59241d5f-5eb0-4a11-b54b-2f5eed065cda	yes	no	3	yes	yes	133	Rsc	Fdif	female	1	No	post	yes	post	3	50	Yes	50_59	yes	yes	999	no	not_too_far	yes	uuid:59241d5f-5eb0-4a11-b54b-2f5eed065cda	pregnant					uuid:59241d5f-5eb0-4a11-b54b-2f5eed065cda	na					uuid:59241d5f-5eb0-4a11-b54b-2f5eed065cda	help_me					uuid:59241d5f-5eb0-4a11-b54b-2f5eed065cda	mosquito					uuid:59241d5f-5eb0-4a11-b54b-2f5eed065cda
uuid:5927e52d-6446-4377-b6c3-b915932deb59	dk	dk	2	yes	na	328	ma		female	na	No	na	yes	na	3	80	Yes	80_89	yes	na	999	na	dk	no	uuid:5927e52d-6446-4377-b6c3-b915932deb59	dk					uuid:5927e52d-6446-4377-b6c3-b915932deb59	na					uuid:5927e52d-6446-4377-b6c3-b915932deb59	uk					uuid:5927e52d-6446-4377-b6c3-b915932deb59	unknown					uuid:5927e52d-6446-4377-b6c3-b915932deb59
uuid:59a2c135-b86f-400c-a886-2d0a0c11ff59	yes	yes	4	yes	yes	383	N.m	Fgg	male	na	No	post	yes	post	3	43	Yes	40_49	yes	yes	3	yes	not_too_far	yes	uuid:59a2c135-b86f-400c-a886-2d0a0c11ff59	dk					uuid:59a2c135-b86f-400c-a886-2d0a0c11ff59	action					uuid:59a2c135-b86f-400c-a886-2d0a0c11ff59	na_already_convinced					uuid:59a2c135-b86f-400c-a886-2d0a0c11ff59	bednets					uuid:59a2c135-b86f-400c-a886-2d0a0c11ff59
uuid:59d4793a-97e0-437a-8aa7-b55b0c778684	yes	no	4	yes	yes	197	D m		female	na	Primary	post	yes	post	1	35	Yes	30_39	yes	yes	999	no	not_too_far	yes	uuid:59d4793a-97e0-437a-8aa7-b55b0c778684	pregnant					uuid:59d4793a-97e0-437a-8aa7-b55b0c778684	na					uuid:59d4793a-97e0-437a-8aa7-b55b0c778684	help_me					uuid:59d4793a-97e0-437a-8aa7-b55b0c778684	iftreat					uuid:59d4793a-97e0-437a-8aa7-b55b0c778684
uuid:59fa3e25-cba9-4935-95b4-8b4ece92a2d3	yes	no	2	yes	yes	449	ap		male	na	Primary	post	yes	post	3	18	Yes	18_29	yes	yes	999	no	close	yes	uuid:59fa3e25-cba9-4935-95b4-8b4ece92a2d3	dk					uuid:59fa3e25-cba9-4935-95b4-8b4ece92a2d3	na					uuid:59fa3e25-cba9-4935-95b4-8b4ece92a2d3	na_already_convinced					uuid:59fa3e25-cba9-4935-95b4-8b4ece92a2d3	unknown					uuid:59fa3e25-cba9-4935-95b4-8b4ece92a2d3
uuid:5a088959-03d7-4f38-a7db-1233acfbd8ab	yes	no	1	yes	yes	2632	sd		female	na	Some_secondary	school	yes	school	1	18	Yes	18_29	yes	yes	999	no	far	yes	uuid:5a088959-03d7-4f38-a7db-1233acfbd8ab	pregnant					uuid:5a088959-03d7-4f38-a7db-1233acfbd8ab	na					uuid:5a088959-03d7-4f38-a7db-1233acfbd8ab	na_already_convinced					uuid:5a088959-03d7-4f38-a7db-1233acfbd8ab	clean_water					uuid:5a088959-03d7-4f38-a7db-1233acfbd8ab
uuid:5a108e4b-5ddb-4e6c-aec9-cfe5d7e60522	yes	no	1	yes	yes	282	Wj		female	na	Some_secondary	school	yes	school	2	18	Yes	18_29	yes	yes	999	no	not_too_far	yes	uuid:5a108e4b-5ddb-4e6c-aec9-cfe5d7e60522	pregnant					uuid:5a108e4b-5ddb-4e6c-aec9-cfe5d7e60522	na					uuid:5a108e4b-5ddb-4e6c-aec9-cfe5d7e60522	na_already_convinced					uuid:5a108e4b-5ddb-4e6c-aec9-cfe5d7e60522	unknown					uuid:5a108e4b-5ddb-4e6c-aec9-cfe5d7e60522
uuid:5a149980-6d9e-40fb-b26c-5bc1c1fb6082	yes	no	3	yes	yes	118	Ej	Sgrh	female	1	No	post	yes	post	3	28	Yes	18_29	no	yes	999	no	not_too_far	yes	uuid:5a149980-6d9e-40fb-b26c-5bc1c1fb6082	pregnant					uuid:5a149980-6d9e-40fb-b26c-5bc1c1fb6082	na					uuid:5a149980-6d9e-40fb-b26c-5bc1c1fb6082	help_family					uuid:5a149980-6d9e-40fb-b26c-5bc1c1fb6082	n/a					uuid:5a149980-6d9e-40fb-b26c-5bc1c1fb6082
uuid:5a353eee-9566-4d11-85d5-d107e50c94ce	yes	no	5	yes	yes	206	Ld		male	na	Some_secondary	post	yes	post	2	19	Yes	18_29	yes	yes	999	no	close	yes	uuid:5a353eee-9566-4d11-85d5-d107e50c94ce	pregnant					uuid:5a353eee-9566-4d11-85d5-d107e50c94ce	na					uuid:5a353eee-9566-4d11-85d5-d107e50c94ce	side_effect					uuid:5a353eee-9566-4d11-85d5-d107e50c94ce	bednets					uuid:5a353eee-9566-4d11-85d5-d107e50c94ce
uuid:5a3c5a4b-0f17-4104-93c0-ced31aee2e24	yes	no	1	yes	yes	579	Oa		female	na	Finish_primary	post	yes	post	1	21	Yes	18_29	yes	yes	999	no	close	yes	uuid:5a3c5a4b-0f17-4104-93c0-ced31aee2e24	pregnant					uuid:5a3c5a4b-0f17-4104-93c0-ced31aee2e24	na					uuid:5a3c5a4b-0f17-4104-93c0-ced31aee2e24	na_already_convinced					uuid:5a3c5a4b-0f17-4104-93c0-ced31aee2e24	clean_water					uuid:5a3c5a4b-0f17-4104-93c0-ced31aee2e24
uuid:5a534472-89ef-4bee-9252-afaf601635c9	yes	no	1	yes	na	2664	Rj		female	na	Finish_primary	na	yes	na	1	32	Yes	30_39	yes	na	999	na	close	no	uuid:5a534472-89ef-4bee-9252-afaf601635c9	pregnant					uuid:5a534472-89ef-4bee-9252-afaf601635c9	na					uuid:5a534472-89ef-4bee-9252-afaf601635c9	na_already_convinced					uuid:5a534472-89ef-4bee-9252-afaf601635c9	clean_water					uuid:5a534472-89ef-4bee-9252-afaf601635c9
uuid:5a82a63c-6b0b-413b-ab11-82dfea5380e1	yes	no	2	yes	yes	266	am		female	na	Primary	post	yes	post	3	30	Yes	30_39	yes	yes	999	no	close	yes	uuid:5a82a63c-6b0b-413b-ab11-82dfea5380e1	pregnant					uuid:5a82a63c-6b0b-413b-ab11-82dfea5380e1	na					uuid:5a82a63c-6b0b-413b-ab11-82dfea5380e1	uk					uuid:5a82a63c-6b0b-413b-ab11-82dfea5380e1	bednets					uuid:5a82a63c-6b0b-413b-ab11-82dfea5380e1
uuid:5a96e2f1-ca9c-418b-bd55-6d8feeacfc5f	yes	no	2	yes	yes	2795	La		female	na	No	post	yes	post	3	40	Yes	40_49	yes	yes	999	no	close	yes	uuid:5a96e2f1-ca9c-418b-bd55-6d8feeacfc5f	pregnant					uuid:5a96e2f1-ca9c-418b-bd55-6d8feeacfc5f	na					uuid:5a96e2f1-ca9c-418b-bd55-6d8feeacfc5f	help_family					uuid:5a96e2f1-ca9c-418b-bd55-6d8feeacfc5f	iftreat					uuid:5a96e2f1-ca9c-418b-bd55-6d8feeacfc5f
uuid:5ad3c2dd-b715-417a-8d88-e0db0ec62392	dk	dk	2	yes	na	156	id	d4 li pat bwe medicament paske li te gentan fini.	male	dk	Primary	na	no	na	999	40	Yes	40_49	yes	na	999	na	dk	no	uuid:5ad3c2dd-b715-417a-8d88-e0db0ec62392	dk					uuid:5ad3c2dd-b715-417a-8d88-e0db0ec62392	na					uuid:5ad3c2dd-b715-417a-8d88-e0db0ec62392	na_already_convinced					uuid:5ad3c2dd-b715-417a-8d88-e0db0ec62392	unknown					uuid:5ad3c2dd-b715-417a-8d88-e0db0ec62392
uuid:5b1b84d2-2718-4f93-9e5c-b983365192c9	yes	no	5	yes	yes	327	Jc		male	na	Some_secondary	post	yes	post	2	52	Yes	50_59	yes	yes	999	no	close	yes	uuid:5b1b84d2-2718-4f93-9e5c-b983365192c9	pregnant					uuid:5b1b84d2-2718-4f93-9e5c-b983365192c9	na					uuid:5b1b84d2-2718-4f93-9e5c-b983365192c9	na_already_convinced					uuid:5b1b84d2-2718-4f93-9e5c-b983365192c9	bednets					uuid:5b1b84d2-2718-4f93-9e5c-b983365192c9
uuid:5b283181-4fa9-4d60-b475-606a1284ecc4	yes	dk	4	yes	yes	2721	Nc	Ok li t pran l	female	na	No	post	yes	post	2	24	Yes	18_29	yes	yes	999	no	close	yes	uuid:5b283181-4fa9-4d60-b475-606a1284ecc4	pregnant					uuid:5b283181-4fa9-4d60-b475-606a1284ecc4	na					uuid:5b283181-4fa9-4d60-b475-606a1284ecc4	help_me					uuid:5b283181-4fa9-4d60-b475-606a1284ecc4	clean_water					uuid:5b283181-4fa9-4d60-b475-606a1284ecc4
uuid:5b4225e0-1c17-48e2-b3ee-bebd0ea445e2	yes	no	4	yes	yes	181	S p		female	na	No	post	yes	post	2	42	Yes	40_49	yes	yes	999	no	close	yes	uuid:5b4225e0-1c17-48e2-b3ee-bebd0ea445e2	pregnant					uuid:5b4225e0-1c17-48e2-b3ee-bebd0ea445e2	na					uuid:5b4225e0-1c17-48e2-b3ee-bebd0ea445e2	uk					uuid:5b4225e0-1c17-48e2-b3ee-bebd0ea445e2	bednets					uuid:5b4225e0-1c17-48e2-b3ee-bebd0ea445e2
uuid:5b547cd9-c83a-4997-a123-698177fc2bb0	yes	yes	4	yes	no	345	Ta	Ok	female	na	Primary	school	yes	post	4	42	Yes	40_49	yes	yes	999	yes	close	yes	uuid:5b547cd9-c83a-4997-a123-698177fc2bb0	pregnant					uuid:5b547cd9-c83a-4997-a123-698177fc2bb0	dk					uuid:5b547cd9-c83a-4997-a123-698177fc2bb0	help_me					uuid:5b547cd9-c83a-4997-a123-698177fc2bb0	iftreat					uuid:5b547cd9-c83a-4997-a123-698177fc2bb0
uuid:5b87d4ac-e1df-4b15-9fcb-57c84bdb0ac8	yes	no	1	yes	na	2618	dr		female	na	No	home	yes	home	1	62	Yes	60_69	yes	yes	999	no	not_too_far	yes	uuid:5b87d4ac-e1df-4b15-9fcb-57c84bdb0ac8	pregnant					uuid:5b87d4ac-e1df-4b15-9fcb-57c84bdb0ac8	na					uuid:5b87d4ac-e1df-4b15-9fcb-57c84bdb0ac8	na_already_convinced					uuid:5b87d4ac-e1df-4b15-9fcb-57c84bdb0ac8	mosquito					uuid:5b87d4ac-e1df-4b15-9fcb-57c84bdb0ac8
uuid:5ba4659c-c06b-49bc-92e2-17590701ef0c	yes	no	4	yes	yes	2547	J.b		female	na	No	post	yes	post	3	50	DK	50_59	no	yes	999	no	not_too_far	yes	uuid:5ba4659c-c06b-49bc-92e2-17590701ef0c	dk					uuid:5ba4659c-c06b-49bc-92e2-17590701ef0c	na					uuid:5ba4659c-c06b-49bc-92e2-17590701ef0c	other					uuid:5ba4659c-c06b-49bc-92e2-17590701ef0c	unknown					uuid:5ba4659c-c06b-49bc-92e2-17590701ef0c
uuid:5bc94a6e-34f6-49d1-9035-af8c6b51ba15	yes	dk	4	yes	no	341	Aj	Er	female	na	Primary	post	yes	post	3	30	Yes	30_39	yes	yes	5	yes	close	yes	uuid:5bc94a6e-34f6-49d1-9035-af8c6b51ba15	pregnant					uuid:5bc94a6e-34f6-49d1-9035-af8c6b51ba15	other					uuid:5bc94a6e-34f6-49d1-9035-af8c6b51ba15	help_me					uuid:5bc94a6e-34f6-49d1-9035-af8c6b51ba15	mosquito					uuid:5bc94a6e-34f6-49d1-9035-af8c6b51ba15
uuid:5bcdf147-2217-4821-b9c1-68f941ca2cb8	yes	no	4	yes	yes	608	Tm	Lot moun yo pala	female	dk	Some_secondary	post	no	post	3	20	Yes	18_29	yes	yes	3	no	not_too_far	no	uuid:5bcdf147-2217-4821-b9c1-68f941ca2cb8	pregnant					uuid:5bcdf147-2217-4821-b9c1-68f941ca2cb8	na					uuid:5bcdf147-2217-4821-b9c1-68f941ca2cb8	help_me					uuid:5bcdf147-2217-4821-b9c1-68f941ca2cb8	clean_water					uuid:5bcdf147-2217-4821-b9c1-68f941ca2cb8
uuid:5bce70f7-4150-4a50-a060-8a9682089bfa	yes	no	2	yes	yes	51	rm		female	na	No	post	no	post	2	50	Yes	50_59	yes	yes	999	no	close	yes	uuid:5bce70f7-4150-4a50-a060-8a9682089bfa	pregnant					uuid:5bce70f7-4150-4a50-a060-8a9682089bfa	na					uuid:5bce70f7-4150-4a50-a060-8a9682089bfa	uk					uuid:5bce70f7-4150-4a50-a060-8a9682089bfa	clean_water					uuid:5bce70f7-4150-4a50-a060-8a9682089bfa
uuid:5bd62a16-4840-4c24-b8c9-cd7f91489b25	dk	dk	4	yes	na	199	P c		male	na	University	na	dk	na	999	57	No	50_59	yes	na	999	na	dk	no	uuid:5bd62a16-4840-4c24-b8c9-cd7f91489b25	Children_under_1					uuid:5bd62a16-4840-4c24-b8c9-cd7f91489b25	na					uuid:5bd62a16-4840-4c24-b8c9-cd7f91489b25	help_me					uuid:5bd62a16-4840-4c24-b8c9-cd7f91489b25	clean_water					uuid:5bd62a16-4840-4c24-b8c9-cd7f91489b25
uuid:5be53e91-8b2a-4919-93c8-e1defc54829e	yes	no	1	dk	yes	272	Mpm		female	na	No	post	yes	post	3	73	Yes	70_79	yes	yes	999	no	close	yes	uuid:5be53e91-8b2a-4919-93c8-e1defc54829e	dk					uuid:5be53e91-8b2a-4919-93c8-e1defc54829e	na					uuid:5be53e91-8b2a-4919-93c8-e1defc54829e	na_already_convinced					uuid:5be53e91-8b2a-4919-93c8-e1defc54829e	clean_water					uuid:5be53e91-8b2a-4919-93c8-e1defc54829e
uuid:5bfa681f-aa27-440f-b935-4a5e847716ff	yes	no	4	yes	yes	176	C j		male	na	Primary	post	no	post	999	27	Yes	18_29	yes	yes	999	yes	close	yes	uuid:5bfa681f-aa27-440f-b935-4a5e847716ff	pregnant					uuid:5bfa681f-aa27-440f-b935-4a5e847716ff	action					uuid:5bfa681f-aa27-440f-b935-4a5e847716ff	help_me					uuid:5bfa681f-aa27-440f-b935-4a5e847716ff	bednets					uuid:5bfa681f-aa27-440f-b935-4a5e847716ff
uuid:5c0a6b6d-65e1-48b6-9be8-b988bd720710	yes	no	2	yes	yes	550	mj		male	na	Primary	post	yes	post	3	45	Yes	40_49	yes	yes	999	yes	close	yes	uuid:5c0a6b6d-65e1-48b6-9be8-b988bd720710	pregnant					uuid:5c0a6b6d-65e1-48b6-9be8-b988bd720710	action					uuid:5c0a6b6d-65e1-48b6-9be8-b988bd720710	na_already_convinced					uuid:5c0a6b6d-65e1-48b6-9be8-b988bd720710	clean_water					uuid:5c0a6b6d-65e1-48b6-9be8-b988bd720710
uuid:5c1dbf7d-c089-4b21-9523-52229d5cbf49	yes	no	2	yes	yes	2773	Mc		female	na	Primary	post	yes	post	2	26	Yes	18_29	yes	yes	999	no	close	yes	uuid:5c1dbf7d-c089-4b21-9523-52229d5cbf49	pregnant					uuid:5c1dbf7d-c089-4b21-9523-52229d5cbf49	na					uuid:5c1dbf7d-c089-4b21-9523-52229d5cbf49	na_already_convinced					uuid:5c1dbf7d-c089-4b21-9523-52229d5cbf49	mosquito					uuid:5c1dbf7d-c089-4b21-9523-52229d5cbf49
uuid:5c2adcd7-b8c7-4b40-b93a-2b4b5eccff9f	na_not_aware_of_post	dk	4	dk	na	360	Al	Li t anset	female	na	Primary	na	dk	na	999	25	Yes	18_29	yes	na	999	na	na_not_aware_post	no	uuid:5c2adcd7-b8c7-4b40-b93a-2b4b5eccff9f	pregnant					uuid:5c2adcd7-b8c7-4b40-b93a-2b4b5eccff9f	na					uuid:5c2adcd7-b8c7-4b40-b93a-2b4b5eccff9f	help_family					uuid:5c2adcd7-b8c7-4b40-b93a-2b4b5eccff9f	unknown					uuid:5c2adcd7-b8c7-4b40-b93a-2b4b5eccff9f
uuid:5c30c5ea-da79-4257-ac8c-ddde85ffcbe8	yes	no	5	yes	yes	2680	Wm		male	na	Finish_primary	post	yes	post	2	24	Yes	18_29	yes	yes	999	no	close	yes	uuid:5c30c5ea-da79-4257-ac8c-ddde85ffcbe8	pregnant					uuid:5c30c5ea-da79-4257-ac8c-ddde85ffcbe8	na					uuid:5c30c5ea-da79-4257-ac8c-ddde85ffcbe8	na_already_convinced					uuid:5c30c5ea-da79-4257-ac8c-ddde85ffcbe8	clean_water					uuid:5c30c5ea-da79-4257-ac8c-ddde85ffcbe8
uuid:5c4340c2-9a4e-42c0-9e9b-6eed22aad676	yes	no	5	yes	yes	225	Dc		female	na	Some_secondary	post	yes	post	3	23	Yes	18_29	yes	yes	999	no	not_too_far	yes	uuid:5c4340c2-9a4e-42c0-9e9b-6eed22aad676	pregnant					uuid:5c4340c2-9a4e-42c0-9e9b-6eed22aad676	na					uuid:5c4340c2-9a4e-42c0-9e9b-6eed22aad676	side_effect					uuid:5c4340c2-9a4e-42c0-9e9b-6eed22aad676	clean_water					uuid:5c4340c2-9a4e-42c0-9e9b-6eed22aad676
uuid:5c62df4b-4e26-44b2-913a-22c52198185b	yes	no	5	no	yes	293	Yy		female	na	Finish_primary	home	yes	home	1	26	Yes	18_29	no	yes	999	yes	close	yes	uuid:5c62df4b-4e26-44b2-913a-22c52198185b	pregnant					uuid:5c62df4b-4e26-44b2-913a-22c52198185b	dk					uuid:5c62df4b-4e26-44b2-913a-22c52198185b	help_me					uuid:5c62df4b-4e26-44b2-913a-22c52198185b	n/a					uuid:5c62df4b-4e26-44b2-913a-22c52198185b
uuid:5c6ff8d3-8faa-42f2-9758-2eb640b4628d	dk	dk	3	dk	dk	144	Ar	Bgh	male	dk	No	home	no	home	2	40	Yes	40_49	yes	yes	999	no	dk	yes	uuid:5c6ff8d3-8faa-42f2-9758-2eb640b4628d	pregnant					uuid:5c6ff8d3-8faa-42f2-9758-2eb640b4628d	na					uuid:5c6ff8d3-8faa-42f2-9758-2eb640b4628d	help_family					uuid:5c6ff8d3-8faa-42f2-9758-2eb640b4628d	iftreat					uuid:5c6ff8d3-8faa-42f2-9758-2eb640b4628d
uuid:5c758b33-e826-4ba2-8419-caa8d625d1f8	yes	no	3	yes	yes	106	Sd	Hguf	male	1	No	post	no	post	2	42	Yes	40_49	yes	yes	999	no	not_too_far	yes	uuid:5c758b33-e826-4ba2-8419-caa8d625d1f8	Children_under_1					uuid:5c758b33-e826-4ba2-8419-caa8d625d1f8	na					uuid:5c758b33-e826-4ba2-8419-caa8d625d1f8	help_me					uuid:5c758b33-e826-4ba2-8419-caa8d625d1f8	other					uuid:5c758b33-e826-4ba2-8419-caa8d625d1f8
uuid:5c81ee20-62c9-4dd6-a91a-f1851920fa78	dk	dk	2	yes	na	79	dd		male	na	Primary	na	yes	na	2	28	Yes	18_29	yes	na	999	na	dk	no	uuid:5c81ee20-62c9-4dd6-a91a-f1851920fa78	pregnant					uuid:5c81ee20-62c9-4dd6-a91a-f1851920fa78	na					uuid:5c81ee20-62c9-4dd6-a91a-f1851920fa78	uk					uuid:5c81ee20-62c9-4dd6-a91a-f1851920fa78	clean_water					uuid:5c81ee20-62c9-4dd6-a91a-f1851920fa78
uuid:5c989d87-ee6d-458b-a832-71b9d539861c	yes	no	2	yes	yes	53	mm		female	na	Primary	post	yes	post	2	30	Yes	30_39	yes	yes	999	no	close	yes	uuid:5c989d87-ee6d-458b-a832-71b9d539861c	pregnant					uuid:5c989d87-ee6d-458b-a832-71b9d539861c	na					uuid:5c989d87-ee6d-458b-a832-71b9d539861c	uk					uuid:5c989d87-ee6d-458b-a832-71b9d539861c	clean_water					uuid:5c989d87-ee6d-458b-a832-71b9d539861c
uuid:5cb60782-382c-4772-96c2-db75719bcf66	yes	no	1	yes	yes	22	Fa		female	na	No	post	yes	post	3	52	Yes	50_59	yes	yes	999	no	close	yes	uuid:5cb60782-382c-4772-96c2-db75719bcf66	pregnant					uuid:5cb60782-382c-4772-96c2-db75719bcf66	na					uuid:5cb60782-382c-4772-96c2-db75719bcf66	na_already_convinced					uuid:5cb60782-382c-4772-96c2-db75719bcf66	bednets					uuid:5cb60782-382c-4772-96c2-db75719bcf66
uuid:5ce3b093-5dc0-4682-8064-3d3cb3c856c5	na_not_aware_of_post	dk	4	yes	na	158	D m		male	na	Finish_primary	na	no	na	999	25	No	18_29	no	na	999	na	na_not_aware_post	no	uuid:5ce3b093-5dc0-4682-8064-3d3cb3c856c5	pregnant					uuid:5ce3b093-5dc0-4682-8064-3d3cb3c856c5	na					uuid:5ce3b093-5dc0-4682-8064-3d3cb3c856c5	help_me					uuid:5ce3b093-5dc0-4682-8064-3d3cb3c856c5	n/a					uuid:5ce3b093-5dc0-4682-8064-3d3cb3c856c5
uuid:5d0f6f32-2010-4d0e-94d4-f5d509fe79ac	yes	no	2	yes	yes	338	mj		female	na	Primary	post	yes	post	2	18	Yes	18_29	yes	yes	999	yes	close	yes	uuid:5d0f6f32-2010-4d0e-94d4-f5d509fe79ac	pregnant					uuid:5d0f6f32-2010-4d0e-94d4-f5d509fe79ac	dk					uuid:5d0f6f32-2010-4d0e-94d4-f5d509fe79ac	uk					uuid:5d0f6f32-2010-4d0e-94d4-f5d509fe79ac	clean_water					uuid:5d0f6f32-2010-4d0e-94d4-f5d509fe79ac
uuid:5d47385a-ce45-4666-beb5-33f6c840a750	yes	no	5	yes	yes	249	Vi	Li t di li t rann anpil ve apre li te finn bwe grenn nan	female	na	No	post	yes	post	3	52	Yes	50_59	yes	yes	999	yes	not_too_far	yes	uuid:5d47385a-ce45-4666-beb5-33f6c840a750	pregnant					uuid:5d47385a-ce45-4666-beb5-33f6c840a750	dk					uuid:5d47385a-ce45-4666-beb5-33f6c840a750	help_me					uuid:5d47385a-ce45-4666-beb5-33f6c840a750	mosquito					uuid:5d47385a-ce45-4666-beb5-33f6c840a750
uuid:5d563b8f-25ff-407a-8bf7-64bd140b382d	yes	no	3	yes	yes	848	Bc	Hrg	male	1	Finish_primary	post	no	post	2	38	Yes	30_39	yes	yes	999	yes	far	yes	uuid:5d563b8f-25ff-407a-8bf7-64bd140b382d	pregnant					uuid:5d563b8f-25ff-407a-8bf7-64bd140b382d	dk					uuid:5d563b8f-25ff-407a-8bf7-64bd140b382d	help_me					uuid:5d563b8f-25ff-407a-8bf7-64bd140b382d	unknown					uuid:5d563b8f-25ff-407a-8bf7-64bd140b382d
uuid:5d567062-a3f7-499f-a6b7-638489e3dce6	yes	no	2	yes	yes	2773	Ja		male	na	Primary	post	yes	post	2	18	Yes	18_29	yes	yes	999	no	close	yes	uuid:5d567062-a3f7-499f-a6b7-638489e3dce6	pregnant					uuid:5d567062-a3f7-499f-a6b7-638489e3dce6	na					uuid:5d567062-a3f7-499f-a6b7-638489e3dce6	side_effect					uuid:5d567062-a3f7-499f-a6b7-638489e3dce6	bednets					uuid:5d567062-a3f7-499f-a6b7-638489e3dce6
uuid:5d714648-7178-4c2b-a0ed-7a12695f4fbd	yes	no	1	yes	yes	599	Md		male	na	Primary	post	yes	post	1	34	Yes	30_39	yes	yes	999	yes	not_too_far	yes	uuid:5d714648-7178-4c2b-a0ed-7a12695f4fbd	Children_under_2					uuid:5d714648-7178-4c2b-a0ed-7a12695f4fbd	action					uuid:5d714648-7178-4c2b-a0ed-7a12695f4fbd	na_already_convinced					uuid:5d714648-7178-4c2b-a0ed-7a12695f4fbd	other					uuid:5d714648-7178-4c2b-a0ed-7a12695f4fbd
uuid:5da24e32-7734-400c-8c82-20d34253ce8b	yes	no	2	yes	yes	935	ap		female	na	Primary	post	yes	post	1	28	Yes	18_29	yes	yes	999	yes	not_too_far	yes	uuid:5da24e32-7734-400c-8c82-20d34253ce8b	pregnant					uuid:5da24e32-7734-400c-8c82-20d34253ce8b	action					uuid:5da24e32-7734-400c-8c82-20d34253ce8b	uk					uuid:5da24e32-7734-400c-8c82-20d34253ce8b	clean_water					uuid:5da24e32-7734-400c-8c82-20d34253ce8b
uuid:5dbbaec4-6680-4701-b620-5fa4dec1d3e5	yes	no	4	yes	yes	202	A p		male	na	Primary	post	yes	post	2	47	Yes	40_49	yes	yes	999	no	not_too_far	yes	uuid:5dbbaec4-6680-4701-b620-5fa4dec1d3e5	pregnant					uuid:5dbbaec4-6680-4701-b620-5fa4dec1d3e5	na					uuid:5dbbaec4-6680-4701-b620-5fa4dec1d3e5	help_me					uuid:5dbbaec4-6680-4701-b620-5fa4dec1d3e5	iftreat					uuid:5dbbaec4-6680-4701-b620-5fa4dec1d3e5
uuid:5dbcaf7e-3a09-43f5-8a56-b1389e7017d1	yes	no	1	yes	yes	36	Wp		female	na	Some_secondary	post	yes	post	2	24	Yes	18_29	yes	yes	999	no	close	yes	uuid:5dbcaf7e-3a09-43f5-8a56-b1389e7017d1	pregnant					uuid:5dbcaf7e-3a09-43f5-8a56-b1389e7017d1	na					uuid:5dbcaf7e-3a09-43f5-8a56-b1389e7017d1	na_already_convinced					uuid:5dbcaf7e-3a09-43f5-8a56-b1389e7017d1	iftreat					uuid:5dbcaf7e-3a09-43f5-8a56-b1389e7017d1
uuid:5df1cf3c-3ea0-49be-bea0-e6a5c9b37a30	yes	no	4	yes	yes	673	C.w	Gy	male	na	Finish_secondary	post	yes	post	3	49	Yes	40_49	yes	yes	5	yes	not_too_far	yes	uuid:5df1cf3c-3ea0-49be-bea0-e6a5c9b37a30	pregnant					uuid:5df1cf3c-3ea0-49be-bea0-e6a5c9b37a30	worm					uuid:5df1cf3c-3ea0-49be-bea0-e6a5c9b37a30	na_already_convinced					uuid:5df1cf3c-3ea0-49be-bea0-e6a5c9b37a30	clean_water					uuid:5df1cf3c-3ea0-49be-bea0-e6a5c9b37a30
uuid:5df87fdf-078e-46b2-b0ce-9fcfc5db4fd5	yes	no	4	yes	yes	264	A e		male	na	University	post	yes	post	2	24	Yes	18_29	yes	yes	999	no	not_too_far	yes	uuid:5df87fdf-078e-46b2-b0ce-9fcfc5db4fd5	pregnant					uuid:5df87fdf-078e-46b2-b0ce-9fcfc5db4fd5	na					uuid:5df87fdf-078e-46b2-b0ce-9fcfc5db4fd5	help_me					uuid:5df87fdf-078e-46b2-b0ce-9fcfc5db4fd5	clean_water					uuid:5df87fdf-078e-46b2-b0ce-9fcfc5db4fd5
uuid:5e0d8abc-4e69-421a-a06b-70262e918440	na_not_aware_of_post	dk	5	dk	na	2695	Lj		female	na	No	na	no	na	0	65	No	60_69	no	na	999	no	na_not_aware_post	no	uuid:5e0d8abc-4e69-421a-a06b-70262e918440	dk					uuid:5e0d8abc-4e69-421a-a06b-70262e918440	na					uuid:5e0d8abc-4e69-421a-a06b-70262e918440	uk					uuid:5e0d8abc-4e69-421a-a06b-70262e918440	n/a					uuid:5e0d8abc-4e69-421a-a06b-70262e918440
uuid:5e4758bc-70e6-4e40-b613-4bd03b17e19d	yes	no	2	yes	yes	451	cc		female	na	Some_secondary	post	yes	post	3	32	Yes	30_39	yes	yes	999	no	close	yes	uuid:5e4758bc-70e6-4e40-b613-4bd03b17e19d	pregnant					uuid:5e4758bc-70e6-4e40-b613-4bd03b17e19d	na					uuid:5e4758bc-70e6-4e40-b613-4bd03b17e19d	na_already_convinced					uuid:5e4758bc-70e6-4e40-b613-4bd03b17e19d	bednets					uuid:5e4758bc-70e6-4e40-b613-4bd03b17e19d
uuid:5e962f56-7e12-4796-9b79-68b659a05647	yes	no	3	yes	yes	101	Ac	Hduf	female	1	No	post	yes	post	3	70	Yes	70_79	yes	yes	999	no	not_too_far	yes	uuid:5e962f56-7e12-4796-9b79-68b659a05647	dk					uuid:5e962f56-7e12-4796-9b79-68b659a05647	na					uuid:5e962f56-7e12-4796-9b79-68b659a05647	help_me					uuid:5e962f56-7e12-4796-9b79-68b659a05647	unknown					uuid:5e962f56-7e12-4796-9b79-68b659a05647
uuid:5ec2cb33-9345-4798-93b7-cb077b84acee	yes	no	5	yes	yes	2686	Lj		female	na	Some_secondary	post	yes	post	2	50	Yes	50_59	no	yes	999	no	close	yes	uuid:5ec2cb33-9345-4798-93b7-cb077b84acee	pregnant					uuid:5ec2cb33-9345-4798-93b7-cb077b84acee	na					uuid:5ec2cb33-9345-4798-93b7-cb077b84acee	uk					uuid:5ec2cb33-9345-4798-93b7-cb077b84acee	n/a					uuid:5ec2cb33-9345-4798-93b7-cb077b84acee
uuid:5eefbdb9-dbc1-47ed-81eb-4e7c19d57066	yes	no	1	other	yes	50	Mal		female	na	Finish_primary	post	yes	post	2	46	Yes	40_49	yes	yes	999	no	close	yes	uuid:5eefbdb9-dbc1-47ed-81eb-4e7c19d57066	dk					uuid:5eefbdb9-dbc1-47ed-81eb-4e7c19d57066	na					uuid:5eefbdb9-dbc1-47ed-81eb-4e7c19d57066	na_already_convinced					uuid:5eefbdb9-dbc1-47ed-81eb-4e7c19d57066	iftreat					uuid:5eefbdb9-dbc1-47ed-81eb-4e7c19d57066
uuid:5f13ecab-e10f-4aa8-a72b-068a9e102c59	yes	no	5	yes	yes	2715	Dc		female	na	Some_secondary	post	yes	post	3	51	Yes	50_59	yes	yes	999	no	close	yes	uuid:5f13ecab-e10f-4aa8-a72b-068a9e102c59	pregnant					uuid:5f13ecab-e10f-4aa8-a72b-068a9e102c59	na					uuid:5f13ecab-e10f-4aa8-a72b-068a9e102c59	side_effect					uuid:5f13ecab-e10f-4aa8-a72b-068a9e102c59	clean_water					uuid:5f13ecab-e10f-4aa8-a72b-068a9e102c59
uuid:5f325315-5fa0-4cf2-b087-2d8220c518ab	yes	no	5	yes	yes	257	Se		male	na	Some_secondary	post	yes	post	3	28	Yes	18_29	yes	yes	999	no	close	yes	uuid:5f325315-5fa0-4cf2-b087-2d8220c518ab	pregnant					uuid:5f325315-5fa0-4cf2-b087-2d8220c518ab	na					uuid:5f325315-5fa0-4cf2-b087-2d8220c518ab	help_me					uuid:5f325315-5fa0-4cf2-b087-2d8220c518ab	bednets					uuid:5f325315-5fa0-4cf2-b087-2d8220c518ab
uuid:5f3c9cbb-7d65-4567-8f69-bdaf89d67543	dk	dk	2	yes	na	558	ee		female	na	Primary	na	yes	na	2	38	Yes	30_39	yes	na	999	na	dk	no	uuid:5f3c9cbb-7d65-4567-8f69-bdaf89d67543	pregnant					uuid:5f3c9cbb-7d65-4567-8f69-bdaf89d67543	na					uuid:5f3c9cbb-7d65-4567-8f69-bdaf89d67543	uk					uuid:5f3c9cbb-7d65-4567-8f69-bdaf89d67543	clean_water					uuid:5f3c9cbb-7d65-4567-8f69-bdaf89d67543
uuid:5f7ac2a7-ec50-4f60-8e27-3912b6be0a29	yes	no	3	yes	yes	628	Sd	Vfj	female	1	No	post	no	post	2	60	No	60_69	no	yes	999	no	close	yes	uuid:5f7ac2a7-ec50-4f60-8e27-3912b6be0a29	pregnant					uuid:5f7ac2a7-ec50-4f60-8e27-3912b6be0a29	na					uuid:5f7ac2a7-ec50-4f60-8e27-3912b6be0a29	help_family					uuid:5f7ac2a7-ec50-4f60-8e27-3912b6be0a29	n/a					uuid:5f7ac2a7-ec50-4f60-8e27-3912b6be0a29
uuid:5fa55b25-73b8-41f9-858a-334a02126b40	yes	no	1	yes	yes	2633	Aj		female	na	No	home	yes	post	1	70	Yes	70_79	yes	yes	999	yes	close	yes	uuid:5fa55b25-73b8-41f9-858a-334a02126b40	dk					uuid:5fa55b25-73b8-41f9-858a-334a02126b40	action					uuid:5fa55b25-73b8-41f9-858a-334a02126b40	na_already_convinced					uuid:5fa55b25-73b8-41f9-858a-334a02126b40	unknown					uuid:5fa55b25-73b8-41f9-858a-334a02126b40
uuid:5fa9e2a4-75e8-4ff7-b6c2-6f023740a485	yes	no	3	yes	yes	103	Mc	Gsibs	female	1	Primary	home	yes	post	3	33	Yes	30_39	yes	yes	999	no	far	yes	uuid:5fa9e2a4-75e8-4ff7-b6c2-6f023740a485	pregnant					uuid:5fa9e2a4-75e8-4ff7-b6c2-6f023740a485	na					uuid:5fa9e2a4-75e8-4ff7-b6c2-6f023740a485	help_family					uuid:5fa9e2a4-75e8-4ff7-b6c2-6f023740a485	unknown					uuid:5fa9e2a4-75e8-4ff7-b6c2-6f023740a485
uuid:5fae5b59-0152-433b-aafd-4ddeb968b6b4	yes	no	5	yes	no	2675	Rb		male	na	Some_secondary	post	yes	post	2	29	Yes	18_29	yes	yes	999	no	close	yes	uuid:5fae5b59-0152-433b-aafd-4ddeb968b6b4	pregnant					uuid:5fae5b59-0152-433b-aafd-4ddeb968b6b4	na					uuid:5fae5b59-0152-433b-aafd-4ddeb968b6b4	na_already_convinced					uuid:5fae5b59-0152-433b-aafd-4ddeb968b6b4	bednets					uuid:5fae5b59-0152-433b-aafd-4ddeb968b6b4
uuid:5fcbe202-8a6b-478c-b1ea-0a190fda6a47	dk	dk	2	dk	na	2768	mb		female	dk	No	na	dk	na	999	90	Yes	90_99	yes	na	999	na	dk	no	uuid:5fcbe202-8a6b-478c-b1ea-0a190fda6a47	dk					uuid:5fcbe202-8a6b-478c-b1ea-0a190fda6a47	na					uuid:5fcbe202-8a6b-478c-b1ea-0a190fda6a47	uk					uuid:5fcbe202-8a6b-478c-b1ea-0a190fda6a47	unknown					uuid:5fcbe202-8a6b-478c-b1ea-0a190fda6a47
uuid:5fe71801-5869-48d9-be41-352fc67eda28	yes	no	4	yes	yes	188	D p		female	na	Primary	post	yes	post	1	50	Yes	50_59	yes	yes	999	no	close	yes	uuid:5fe71801-5869-48d9-be41-352fc67eda28	Children_under_1					uuid:5fe71801-5869-48d9-be41-352fc67eda28	na					uuid:5fe71801-5869-48d9-be41-352fc67eda28	help_me					uuid:5fe71801-5869-48d9-be41-352fc67eda28	iftreat					uuid:5fe71801-5869-48d9-be41-352fc67eda28
uuid:6073e3f4-eddc-4130-9663-e9a6441ca74a	dk	dk	2	yes	na	329	nc		female	na	Primary	na	no	na	999	23	Yes	18_29	yes	na	999	na	dk	no	uuid:6073e3f4-eddc-4130-9663-e9a6441ca74a	dk					uuid:6073e3f4-eddc-4130-9663-e9a6441ca74a	na					uuid:6073e3f4-eddc-4130-9663-e9a6441ca74a	side_effect					uuid:6073e3f4-eddc-4130-9663-e9a6441ca74a	unknown					uuid:6073e3f4-eddc-4130-9663-e9a6441ca74a
uuid:61021aef-1eab-4a81-8e82-dc6c1aa6f209	yes	no	1	yes	yes	2656	Jp		female	na	Some_secondary	home	yes	school	2	19	Yes	18_29	yes	yes	999	no	na_not_aware_post	yes	uuid:61021aef-1eab-4a81-8e82-dc6c1aa6f209	pregnant					uuid:61021aef-1eab-4a81-8e82-dc6c1aa6f209	na					uuid:61021aef-1eab-4a81-8e82-dc6c1aa6f209	help_me					uuid:61021aef-1eab-4a81-8e82-dc6c1aa6f209	clean_water					uuid:61021aef-1eab-4a81-8e82-dc6c1aa6f209
uuid:6159e0f6-15d6-4746-b62d-3848ac6678ec	na_not_aware_of_post	dk	4	yes	na	160	G j	Yo pa tande pale de maladi a	female	na	No	na	no	na	999	57	No	50_59	no	na	999	na	na_not_aware_post	no	uuid:6159e0f6-15d6-4746-b62d-3848ac6678ec	dk					uuid:6159e0f6-15d6-4746-b62d-3848ac6678ec	na					uuid:6159e0f6-15d6-4746-b62d-3848ac6678ec	help_me					uuid:6159e0f6-15d6-4746-b62d-3848ac6678ec	n/a					uuid:6159e0f6-15d6-4746-b62d-3848ac6678ec
uuid:615c08d5-fbf6-4c32-9207-9a41ae524aed	yes	no	4	yes	yes	255	R s		male	na	University	post	yes	post	2	32	Yes	30_39	yes	yes	999	no	close	yes	uuid:615c08d5-fbf6-4c32-9207-9a41ae524aed	pregnant					uuid:615c08d5-fbf6-4c32-9207-9a41ae524aed	na					uuid:615c08d5-fbf6-4c32-9207-9a41ae524aed	help_me					uuid:615c08d5-fbf6-4c32-9207-9a41ae524aed	bednets					uuid:615c08d5-fbf6-4c32-9207-9a41ae524aed
uuid:615db271-1752-4198-8045-31389793b3fe	yes	no	1	yes	yes	578	Np		female	na	Finish_primary	post	yes	post	1	18	Yes	18_29	yes	yes	999	yes	close	yes	uuid:615db271-1752-4198-8045-31389793b3fe	pregnant					uuid:615db271-1752-4198-8045-31389793b3fe	not_eat					uuid:615db271-1752-4198-8045-31389793b3fe	na_already_convinced					uuid:615db271-1752-4198-8045-31389793b3fe	clean_water					uuid:615db271-1752-4198-8045-31389793b3fe
uuid:61b08e96-e8a0-4b77-a624-9f29cb445bfa	yes	no	1	dk	other	269	Jf		male	na	No	na	yes	post	1	56	Yes	50_59	no	no	999	na	close	yes	uuid:61b08e96-e8a0-4b77-a624-9f29cb445bfa	dk					uuid:61b08e96-e8a0-4b77-a624-9f29cb445bfa	na					uuid:61b08e96-e8a0-4b77-a624-9f29cb445bfa	side_effect					uuid:61b08e96-e8a0-4b77-a624-9f29cb445bfa	n/a					uuid:61b08e96-e8a0-4b77-a624-9f29cb445bfa
uuid:61b11e95-6633-497c-82cc-3e019d59beee	yes	no	1	yes	yes	3	Aw		male	na	No	post	yes	post	2	999	Yes	80_89	yes	yes	999	no	close	yes	uuid:61b11e95-6633-497c-82cc-3e019d59beee	pregnant					uuid:61b11e95-6633-497c-82cc-3e019d59beee	na					uuid:61b11e95-6633-497c-82cc-3e019d59beee	na_already_convinced					uuid:61b11e95-6633-497c-82cc-3e019d59beee	iftreat					uuid:61b11e95-6633-497c-82cc-3e019d59beee
uuid:61bcf310-a319-4890-83a3-c9ca46c23b00	yes	no	5	yes	yes	221	Di		female	na	Some_secondary	post	yes	post	3	26	Yes	18_29	yes	yes	999	no	close	yes	uuid:61bcf310-a319-4890-83a3-c9ca46c23b00	pregnant					uuid:61bcf310-a319-4890-83a3-c9ca46c23b00	na					uuid:61bcf310-a319-4890-83a3-c9ca46c23b00	na_already_convinced					uuid:61bcf310-a319-4890-83a3-c9ca46c23b00	clean_water					uuid:61bcf310-a319-4890-83a3-c9ca46c23b00
uuid:61c6c662-1db4-4c61-8db0-75bfe1602f06	yes	no	1	yes	yes	2628	ge		female	na	Some_secondary	school	yes	school	2	19	Yes	18_29	yes	yes	999	no	far	yes	uuid:61c6c662-1db4-4c61-8db0-75bfe1602f06	pregnant					uuid:61c6c662-1db4-4c61-8db0-75bfe1602f06	action					uuid:61c6c662-1db4-4c61-8db0-75bfe1602f06	na_already_convinced					uuid:61c6c662-1db4-4c61-8db0-75bfe1602f06	clean_water					uuid:61c6c662-1db4-4c61-8db0-75bfe1602f06
uuid:62269d53-022f-4fc7-9327-bab5d324d43a	yes	no	5	yes	yes	2698	Ve		female	na	Primary	post	yes	post	3	43	Yes	40_49	yes	yes	999	no	not_too_far	yes	uuid:62269d53-022f-4fc7-9327-bab5d324d43a	pregnant					uuid:62269d53-022f-4fc7-9327-bab5d324d43a	na					uuid:62269d53-022f-4fc7-9327-bab5d324d43a	help_me					uuid:62269d53-022f-4fc7-9327-bab5d324d43a	clean_water					uuid:62269d53-022f-4fc7-9327-bab5d324d43a
uuid:626389d9-8cd3-4a08-b63c-8c286e93405e	na_not_aware_of_post	dk	5	yes	na	226	Bo	Pat gen konesans sou grenn yo	female	na	No	na	no	na	0	34	Yes	30_39	no	no	999	na	na_not_aware_post	no	uuid:626389d9-8cd3-4a08-b63c-8c286e93405e	dk					uuid:626389d9-8cd3-4a08-b63c-8c286e93405e	na					uuid:626389d9-8cd3-4a08-b63c-8c286e93405e	side_effect					uuid:626389d9-8cd3-4a08-b63c-8c286e93405e	n/a					uuid:626389d9-8cd3-4a08-b63c-8c286e93405e
uuid:62842001-301e-4286-9c15-cc0b974b916b	yes	no	2	yes	yes	256	sn		female	na	No	post	yes	post	2	38	Yes	30_39	yes	yes	999	no	close	yes	uuid:62842001-301e-4286-9c15-cc0b974b916b	pregnant					uuid:62842001-301e-4286-9c15-cc0b974b916b	na					uuid:62842001-301e-4286-9c15-cc0b974b916b	uk					uuid:62842001-301e-4286-9c15-cc0b974b916b	clean_water					uuid:62842001-301e-4286-9c15-cc0b974b916b
uuid:62d2de5f-8a07-4bfa-bf56-101e0900b63d	yes	no	1	yes	yes	16	Dt	Li di se mouch ki bay li. E li bay moun gwo kou...	female	na	Finish_primary	post	yes	post	1	22	Yes	18_29	yes	yes	999	no	close	yes	uuid:62d2de5f-8a07-4bfa-bf56-101e0900b63d	pregnant					uuid:62d2de5f-8a07-4bfa-bf56-101e0900b63d	na					uuid:62d2de5f-8a07-4bfa-bf56-101e0900b63d	na_already_convinced					uuid:62d2de5f-8a07-4bfa-bf56-101e0900b63d	iftreat					uuid:62d2de5f-8a07-4bfa-bf56-101e0900b63d
uuid:635bc00b-3fdf-478d-a3c9-8705d8182150	yes	no	5	yes	yes	288	Pj		male	na	University	post	yes	post	3	34	Yes	30_39	yes	yes	999	no	close	yes	uuid:635bc00b-3fdf-478d-a3c9-8705d8182150	pregnant					uuid:635bc00b-3fdf-478d-a3c9-8705d8182150	na					uuid:635bc00b-3fdf-478d-a3c9-8705d8182150	na_already_convinced					uuid:635bc00b-3fdf-478d-a3c9-8705d8182150	bednets					uuid:635bc00b-3fdf-478d-a3c9-8705d8182150
uuid:63849dc7-71d8-406b-b486-ffd8a2d442aa	yes	no	1	yes	yes	572	Lv		male	na	Primary	post	yes	post	1	60	Yes	60_69	yes	yes	999	no	close	yes	uuid:63849dc7-71d8-406b-b486-ffd8a2d442aa	pregnant					uuid:63849dc7-71d8-406b-b486-ffd8a2d442aa	na					uuid:63849dc7-71d8-406b-b486-ffd8a2d442aa	na_already_convinced					uuid:63849dc7-71d8-406b-b486-ffd8a2d442aa	mosquito					uuid:63849dc7-71d8-406b-b486-ffd8a2d442aa
uuid:638e8567-a879-44a3-bce0-c8a377140bb0	yes	no	3	yes	yes	538	Sr	Bfv	male	1	Some_secondary	home	no	post	2	25	Yes	18_29	yes	yes	999	yes	not_too_far	yes	uuid:638e8567-a879-44a3-bce0-c8a377140bb0	pregnant					uuid:638e8567-a879-44a3-bce0-c8a377140bb0	dk					uuid:638e8567-a879-44a3-bce0-c8a377140bb0	help_me					uuid:638e8567-a879-44a3-bce0-c8a377140bb0	clean_water					uuid:638e8567-a879-44a3-bce0-c8a377140bb0
uuid:6398ca2b-6149-403a-90de-819d841677b8	yes	no	5	yes	yes	436	Am		female	na	No	post	yes	post	1	38	Yes	30_39	yes	yes	999	yes	close	yes	uuid:6398ca2b-6149-403a-90de-819d841677b8	pregnant					uuid:6398ca2b-6149-403a-90de-819d841677b8	dk					uuid:6398ca2b-6149-403a-90de-819d841677b8	help_me					uuid:6398ca2b-6149-403a-90de-819d841677b8	clean_water					uuid:6398ca2b-6149-403a-90de-819d841677b8
uuid:63a39e21-c9a1-490d-8b55-b97f2651b7ef	yes	no	3	yes	yes	129	Rd	Hsjs	male	1	Primary	post	yes	post	3	35	No	30_39	no	yes	999	no	close	yes	uuid:63a39e21-c9a1-490d-8b55-b97f2651b7ef	pregnant					uuid:63a39e21-c9a1-490d-8b55-b97f2651b7ef	na					uuid:63a39e21-c9a1-490d-8b55-b97f2651b7ef	help_family					uuid:63a39e21-c9a1-490d-8b55-b97f2651b7ef	n/a					uuid:63a39e21-c9a1-490d-8b55-b97f2651b7ef
uuid:63aeaaa9-81e8-430c-aac9-e4d62ce5a1f7	yes	no	1	yes	yes	2671	ap		male	na	Some_secondary	school	yes	school	999	18	Yes	18_29	yes	yes	999	yes	not_too_far	yes	uuid:63aeaaa9-81e8-430c-aac9-e4d62ce5a1f7	dk					uuid:63aeaaa9-81e8-430c-aac9-e4d62ce5a1f7	action					uuid:63aeaaa9-81e8-430c-aac9-e4d62ce5a1f7	na_already_convinced					uuid:63aeaaa9-81e8-430c-aac9-e4d62ce5a1f7	clean_water					uuid:63aeaaa9-81e8-430c-aac9-e4d62ce5a1f7
uuid:63bf680c-e646-4bce-a3bb-7f7ca3780b2d	dk	dk	2	yes	na	2761	ed		female	na	Some_secondary	na	yes	na	1	24	Yes	18_29	yes	na	999	na	dk	no	uuid:63bf680c-e646-4bce-a3bb-7f7ca3780b2d	pregnant					uuid:63bf680c-e646-4bce-a3bb-7f7ca3780b2d	na					uuid:63bf680c-e646-4bce-a3bb-7f7ca3780b2d	uk					uuid:63bf680c-e646-4bce-a3bb-7f7ca3780b2d	unknown					uuid:63bf680c-e646-4bce-a3bb-7f7ca3780b2d
uuid:63d4c8de-2750-4c34-a557-aa5c832ed249	yes	no	4	yes	yes	181	M p		female	na	Some_secondary	post	yes	post	2	21	Yes	18_29	yes	yes	999	no	close	yes	uuid:63d4c8de-2750-4c34-a557-aa5c832ed249	Children_under_1					uuid:63d4c8de-2750-4c34-a557-aa5c832ed249	na					uuid:63d4c8de-2750-4c34-a557-aa5c832ed249	help_me					uuid:63d4c8de-2750-4c34-a557-aa5c832ed249	unknown					uuid:63d4c8de-2750-4c34-a557-aa5c832ed249
uuid:63ee4952-14cd-4dfb-8118-ce00affd292e	na_not_aware_of_post	dk	5	yes	na	226	Jz	Pat jwenn enfomasyon sou grenn nan	male	na	No	na	no	na	0	35	Yes	30_39	no	no	999	na	na_not_aware_post	no	uuid:63ee4952-14cd-4dfb-8118-ce00affd292e	pregnant					uuid:63ee4952-14cd-4dfb-8118-ce00affd292e	na					uuid:63ee4952-14cd-4dfb-8118-ce00affd292e	help_me					uuid:63ee4952-14cd-4dfb-8118-ce00affd292e	n/a					uuid:63ee4952-14cd-4dfb-8118-ce00affd292e
uuid:63f20737-b9ea-45ee-acab-2ceae11a9f1b	yes	no	4	yes	yes	162	J k		female	na	No	post	yes	post	999	45	Yes	40_49	yes	yes	999	no	close	yes	uuid:63f20737-b9ea-45ee-acab-2ceae11a9f1b	pregnant					uuid:63f20737-b9ea-45ee-acab-2ceae11a9f1b	na					uuid:63f20737-b9ea-45ee-acab-2ceae11a9f1b	uk					uuid:63f20737-b9ea-45ee-acab-2ceae11a9f1b	bednets					uuid:63f20737-b9ea-45ee-acab-2ceae11a9f1b
uuid:63fa9efb-22c4-4739-8747-9250622d6ebd	yes	no	5	yes	yes	2712	Mj		female	na	Finish_primary	post	yes	post	2	25	Yes	18_29	no	yes	999	no	close	yes	uuid:63fa9efb-22c4-4739-8747-9250622d6ebd	dk					uuid:63fa9efb-22c4-4739-8747-9250622d6ebd	na					uuid:63fa9efb-22c4-4739-8747-9250622d6ebd	side_effect					uuid:63fa9efb-22c4-4739-8747-9250622d6ebd	n/a					uuid:63fa9efb-22c4-4739-8747-9250622d6ebd
uuid:645174b1-2efb-46da-951b-391c493f594e	yes	no	5	yes	yes	1007	Em		female	na	No	home	yes	home	2	64	Yes	60_69	no	yes	999	no	close	yes	uuid:645174b1-2efb-46da-951b-391c493f594e	dk					uuid:645174b1-2efb-46da-951b-391c493f594e	na					uuid:645174b1-2efb-46da-951b-391c493f594e	help_me					uuid:645174b1-2efb-46da-951b-391c493f594e	n/a					uuid:645174b1-2efb-46da-951b-391c493f594e
uuid:647f1b3a-d250-44d9-aeb8-b112d6be5ddd	yes	no	1	yes	yes	2629	ej		female	na	No	post	yes	post	2	52	Yes	50_59	yes	yes	999	yes	close	yes	uuid:647f1b3a-d250-44d9-aeb8-b112d6be5ddd	pregnant					uuid:647f1b3a-d250-44d9-aeb8-b112d6be5ddd	action					uuid:647f1b3a-d250-44d9-aeb8-b112d6be5ddd	na_already_convinced					uuid:647f1b3a-d250-44d9-aeb8-b112d6be5ddd	mosquito					uuid:647f1b3a-d250-44d9-aeb8-b112d6be5ddd
uuid:64850a24-b3e3-4dd5-bd69-53c3aee91642	yes	no	1	yes	yes	2807	sm		female	na	No	post	yes	post	1	54	Yes	50_59	yes	yes	999	no	close	yes	uuid:64850a24-b3e3-4dd5-bd69-53c3aee91642	pregnant					uuid:64850a24-b3e3-4dd5-bd69-53c3aee91642	na					uuid:64850a24-b3e3-4dd5-bd69-53c3aee91642	na_already_convinced					uuid:64850a24-b3e3-4dd5-bd69-53c3aee91642	iftreat					uuid:64850a24-b3e3-4dd5-bd69-53c3aee91642
uuid:648587bf-ada3-48cf-bd1d-0581dffd7ca3	yes	no	2	yes	yes	153	tg		female	na	Primary	post	yes	post	2	43	Yes	40_49	yes	yes	999	no	close	yes	uuid:648587bf-ada3-48cf-bd1d-0581dffd7ca3	pregnant					uuid:648587bf-ada3-48cf-bd1d-0581dffd7ca3	na					uuid:648587bf-ada3-48cf-bd1d-0581dffd7ca3	na_already_convinced					uuid:648587bf-ada3-48cf-bd1d-0581dffd7ca3	unknown					uuid:648587bf-ada3-48cf-bd1d-0581dffd7ca3
uuid:6488a3d4-dce8-4f10-9932-0ca8ddf1c59f	dk	dk	3	other	dk	863	At	Nrge	female	dk	Finish_primary	home	no	home	1	34	Yes	30_39	yes	yes	999	yes	dk	yes	uuid:6488a3d4-dce8-4f10-9932-0ca8ddf1c59f	dk					uuid:6488a3d4-dce8-4f10-9932-0ca8ddf1c59f	not_eat					uuid:6488a3d4-dce8-4f10-9932-0ca8ddf1c59f	help_family					uuid:6488a3d4-dce8-4f10-9932-0ca8ddf1c59f	other					uuid:6488a3d4-dce8-4f10-9932-0ca8ddf1c59f
uuid:649b84d0-3713-4589-9039-49bf9ea269cf	yes	no	1	yes	yes	50	Mm		male	na	Some_secondary	post	yes	post	1	21	Yes	18_29	yes	yes	999	yes	close	yes	uuid:649b84d0-3713-4589-9039-49bf9ea269cf	pregnant					uuid:649b84d0-3713-4589-9039-49bf9ea269cf	dk					uuid:649b84d0-3713-4589-9039-49bf9ea269cf	na_already_convinced					uuid:649b84d0-3713-4589-9039-49bf9ea269cf	clean_water					uuid:649b84d0-3713-4589-9039-49bf9ea269cf
uuid:64b1a438-afcb-4d20-a053-0f8fd6e81c79	yes	no	2	yes	yes	327	vf		female	na	No	post	yes	post	2	56	Yes	50_59	yes	yes	999	no	not_too_far	yes	uuid:64b1a438-afcb-4d20-a053-0f8fd6e81c79	pregnant					uuid:64b1a438-afcb-4d20-a053-0f8fd6e81c79	na					uuid:64b1a438-afcb-4d20-a053-0f8fd6e81c79	uk					uuid:64b1a438-afcb-4d20-a053-0f8fd6e81c79	unknown					uuid:64b1a438-afcb-4d20-a053-0f8fd6e81c79
uuid:64cb162d-73c0-4103-a3cc-a4eb5e16db64	yes	no	1	yes	yes	12	Rj		female	na	No	post	yes	post	1	999	Yes	60_69	yes	yes	999	no	close	yes	uuid:64cb162d-73c0-4103-a3cc-a4eb5e16db64	dk					uuid:64cb162d-73c0-4103-a3cc-a4eb5e16db64	na					uuid:64cb162d-73c0-4103-a3cc-a4eb5e16db64	uk					uuid:64cb162d-73c0-4103-a3cc-a4eb5e16db64	iftreat					uuid:64cb162d-73c0-4103-a3cc-a4eb5e16db64
uuid:650e9206-7e22-4c3d-a2ff-d835b7c84556	yes	no	1	yes	yes	2652	Ep	Tout moun ka bwèl. Timoun, fanm ansent...	female	na	Primary	home	yes	post	1	59	Yes	50_59	yes	yes	999	no	close	yes	uuid:650e9206-7e22-4c3d-a2ff-d835b7c84556	other					uuid:650e9206-7e22-4c3d-a2ff-d835b7c84556	na					uuid:650e9206-7e22-4c3d-a2ff-d835b7c84556	na_already_convinced					uuid:650e9206-7e22-4c3d-a2ff-d835b7c84556	unknown					uuid:650e9206-7e22-4c3d-a2ff-d835b7c84556
uuid:651e9877-6f71-4dab-975d-72e519e835fb	yes	no	4	yes	yes	195	P m		female	na	Some_secondary	school	yes	school	1	47	Yes	40_49	yes	yes	999	yes	not_too_far	yes	uuid:651e9877-6f71-4dab-975d-72e519e835fb	pregnant					uuid:651e9877-6f71-4dab-975d-72e519e835fb	action					uuid:651e9877-6f71-4dab-975d-72e519e835fb	help_me					uuid:651e9877-6f71-4dab-975d-72e519e835fb	clean_water					uuid:651e9877-6f71-4dab-975d-72e519e835fb
uuid:65306236-9a8e-448c-bffe-6219db36b044	yes	no	3	yes	yes	141	ke	vdjf	female	1	Finish_primary	post	yes	post	3	34	DK	30_39	yes	yes	999	yes	close	yes	uuid:65306236-9a8e-448c-bffe-6219db36b044	pregnant					uuid:65306236-9a8e-448c-bffe-6219db36b044	na					uuid:65306236-9a8e-448c-bffe-6219db36b044	help_me					uuid:65306236-9a8e-448c-bffe-6219db36b044	iftreat					uuid:65306236-9a8e-448c-bffe-6219db36b044
uuid:6538cb6d-5219-4c92-a22e-83450fdf570b	dk	no	3	yes	na	135	Bc	Ggkd	female	dk	No	na	no	na	2	52	Yes	50_59	yes	na	999	na	dk	no	uuid:6538cb6d-5219-4c92-a22e-83450fdf570b	pregnant					uuid:6538cb6d-5219-4c92-a22e-83450fdf570b	na					uuid:6538cb6d-5219-4c92-a22e-83450fdf570b	side_effect					uuid:6538cb6d-5219-4c92-a22e-83450fdf570b	unknown					uuid:6538cb6d-5219-4c92-a22e-83450fdf570b
uuid:653c2d1a-36e5-4d99-bd0d-09a4d7e373db	yes	no	1	yes	yes	2631	mt		male	na	Some_secondary	school	yes	post	2	18	Yes	18_29	yes	yes	5	yes	not_too_far	yes	uuid:653c2d1a-36e5-4d99-bd0d-09a4d7e373db	pregnant					uuid:653c2d1a-36e5-4d99-bd0d-09a4d7e373db	action					uuid:653c2d1a-36e5-4d99-bd0d-09a4d7e373db	na_already_convinced					uuid:653c2d1a-36e5-4d99-bd0d-09a4d7e373db	iftreat					uuid:653c2d1a-36e5-4d99-bd0d-09a4d7e373db
uuid:65574b49-f31d-4922-a97e-1b5d8fc1f66b	yes	no	3	yes	yes	115	Aj	Gsg	male	1	No	post	yes	post	3	58	Yes	50_59	yes	yes	999	no	not_too_far	yes	uuid:65574b49-f31d-4922-a97e-1b5d8fc1f66b	dk					uuid:65574b49-f31d-4922-a97e-1b5d8fc1f66b	na					uuid:65574b49-f31d-4922-a97e-1b5d8fc1f66b	side_effect					uuid:65574b49-f31d-4922-a97e-1b5d8fc1f66b	unknown					uuid:65574b49-f31d-4922-a97e-1b5d8fc1f66b
uuid:65a6b6cc-444e-4c2b-83a2-3a90d86c9bba	other	no	1	yes	na	276	Ej		female	na	Some_secondary	na	yes	na	1	20	Yes	18_29	yes	na	999	na	not_too_far	no	uuid:65a6b6cc-444e-4c2b-83a2-3a90d86c9bba	pregnant					uuid:65a6b6cc-444e-4c2b-83a2-3a90d86c9bba	na					uuid:65a6b6cc-444e-4c2b-83a2-3a90d86c9bba	uk					uuid:65a6b6cc-444e-4c2b-83a2-3a90d86c9bba	unknown					uuid:65a6b6cc-444e-4c2b-83a2-3a90d86c9bba
uuid:65b54294-9e21-4779-b00e-3c751b9855b1	yes	no	1	yes	yes	2618	mo		male	na	No	post	yes	post	1	50	Yes	50_59	yes	yes	999	no	not_too_far	yes	uuid:65b54294-9e21-4779-b00e-3c751b9855b1	dk					uuid:65b54294-9e21-4779-b00e-3c751b9855b1	na					uuid:65b54294-9e21-4779-b00e-3c751b9855b1	na_already_convinced					uuid:65b54294-9e21-4779-b00e-3c751b9855b1	unknown					uuid:65b54294-9e21-4779-b00e-3c751b9855b1
uuid:65dda1ca-4c29-4068-9717-94e50451c2e4	yes	no	1	yes	yes	2604	mm		female	na	Some_secondary	post	yes	post	2	41	Yes	40_49	yes	yes	999	no	not_too_far	yes	uuid:65dda1ca-4c29-4068-9717-94e50451c2e4	pregnant					uuid:65dda1ca-4c29-4068-9717-94e50451c2e4	na					uuid:65dda1ca-4c29-4068-9717-94e50451c2e4	na_already_convinced					uuid:65dda1ca-4c29-4068-9717-94e50451c2e4	clean_water					uuid:65dda1ca-4c29-4068-9717-94e50451c2e4
uuid:65fb9002-9e2d-46ea-935f-ce77fb26e336	yes	no	3	yes	yes	526	Ld	Bud	male	1	Finish_primary	post	yes	post	3	42	Yes	40_49	yes	yes	999	no	not_too_far	yes	uuid:65fb9002-9e2d-46ea-935f-ce77fb26e336	pregnant					uuid:65fb9002-9e2d-46ea-935f-ce77fb26e336	na					uuid:65fb9002-9e2d-46ea-935f-ce77fb26e336	help_family					uuid:65fb9002-9e2d-46ea-935f-ce77fb26e336	other					uuid:65fb9002-9e2d-46ea-935f-ce77fb26e336
uuid:66119f25-b3e6-40cc-bdb6-14cce2a71810	yes	dk	4	dk	yes	2575	Bc	Dfh	male	na	Primary	post	yes	post	2	35	Yes	30_39	yes	yes	999	yes	not_too_far	yes	uuid:66119f25-b3e6-40cc-bdb6-14cce2a71810	pregnant					uuid:66119f25-b3e6-40cc-bdb6-14cce2a71810	action					uuid:66119f25-b3e6-40cc-bdb6-14cce2a71810	help_me					uuid:66119f25-b3e6-40cc-bdb6-14cce2a71810	clean_water					uuid:66119f25-b3e6-40cc-bdb6-14cce2a71810
uuid:6627c287-f8d1-45d6-8084-a5d7b8430499	yes	no	1	yes	yes	597	Aa	Chyen ak chat ki bay li. Pa kite yo sèvi nan veso nap itilize...	female	na	No	post	no	post	0	36	Yes	30_39	yes	yes	999	yes	close	yes	uuid:6627c287-f8d1-45d6-8084-a5d7b8430499	Children_unk					uuid:6627c287-f8d1-45d6-8084-a5d7b8430499	action					uuid:6627c287-f8d1-45d6-8084-a5d7b8430499	na_already_convinced					uuid:6627c287-f8d1-45d6-8084-a5d7b8430499	other					uuid:6627c287-f8d1-45d6-8084-a5d7b8430499
uuid:6670a765-abf4-4a35-96d4-d1b2e936ed48	yes	no	1	yes	yes	596	jt		female	na	Some_secondary	post	yes	post	1	31	Yes	30_39	yes	yes	999	yes	not_too_far	yes	uuid:6670a765-abf4-4a35-96d4-d1b2e936ed48	pregnant					uuid:6670a765-abf4-4a35-96d4-d1b2e936ed48	action					uuid:6670a765-abf4-4a35-96d4-d1b2e936ed48	na_already_convinced					uuid:6670a765-abf4-4a35-96d4-d1b2e936ed48	iftreat					uuid:6670a765-abf4-4a35-96d4-d1b2e936ed48
uuid:66c51e21-c29a-478e-b485-7db394f035e2	yes	no	2	yes	yes	302	le		female	na	Primary	post	yes	post	2	40	Yes	40_49	yes	yes	999	yes	close	yes	uuid:66c51e21-c29a-478e-b485-7db394f035e2	pregnant					uuid:66c51e21-c29a-478e-b485-7db394f035e2	dk					uuid:66c51e21-c29a-478e-b485-7db394f035e2	na_already_convinced					uuid:66c51e21-c29a-478e-b485-7db394f035e2	clean_water					uuid:66c51e21-c29a-478e-b485-7db394f035e2
uuid:670469c9-f79e-4539-9594-89fb51a24125	yes	no	4	yes	yes	220	J l		female	na	Some_secondary	post	no	post	999	38	Yes	30_39	yes	yes	999	yes	not_too_far	yes	uuid:670469c9-f79e-4539-9594-89fb51a24125	pregnant					uuid:670469c9-f79e-4539-9594-89fb51a24125	dk					uuid:670469c9-f79e-4539-9594-89fb51a24125	help_family					uuid:670469c9-f79e-4539-9594-89fb51a24125	clean_water					uuid:670469c9-f79e-4539-9594-89fb51a24125
uuid:671eb382-6666-4bc2-acd8-9c1a6148056d	na_not_aware_of_post	dk	5	yes	na	151	mj	to pat jwen medikaman nan zon nan	female	na	No	na	dk	na	999	19	No	18_29	no	na	999	na	na_not_aware_post	no	uuid:671eb382-6666-4bc2-acd8-9c1a6148056d	dk					uuid:671eb382-6666-4bc2-acd8-9c1a6148056d	na					uuid:671eb382-6666-4bc2-acd8-9c1a6148056d	uk					uuid:671eb382-6666-4bc2-acd8-9c1a6148056d	n/a					uuid:671eb382-6666-4bc2-acd8-9c1a6148056d
uuid:671f6bbf-1f60-4e9f-bc13-5951e3e3bdd7	yes	no	2	yes	yes	2847	ia		female	na	Some_secondary	school	yes	school	1	22	Yes	18_29	yes	yes	5	yes	close	yes	uuid:671f6bbf-1f60-4e9f-bc13-5951e3e3bdd7	pregnant					uuid:671f6bbf-1f60-4e9f-bc13-5951e3e3bdd7	dk					uuid:671f6bbf-1f60-4e9f-bc13-5951e3e3bdd7	uk					uuid:671f6bbf-1f60-4e9f-bc13-5951e3e3bdd7	bednets					uuid:671f6bbf-1f60-4e9f-bc13-5951e3e3bdd7
uuid:6723353c-632c-4e01-b68e-0be337833257	yes	no	1	yes	yes	288	Sm		female	na	Some_secondary	home	yes	post	3	34	Yes	30_39	yes	yes	999	yes	close	yes	uuid:6723353c-632c-4e01-b68e-0be337833257	pregnant					uuid:6723353c-632c-4e01-b68e-0be337833257	dk					uuid:6723353c-632c-4e01-b68e-0be337833257	na_already_convinced					uuid:6723353c-632c-4e01-b68e-0be337833257	bednets					uuid:6723353c-632c-4e01-b68e-0be337833257
uuid:67cc2d91-5223-4f0b-99c0-9c42ce661b3b	yes	no	5	yes	yes	1066	Rd		female	na	No	post	yes	post	2	39	Yes	30_39	yes	yes	999	no	close	yes	uuid:67cc2d91-5223-4f0b-99c0-9c42ce661b3b	pregnant					uuid:67cc2d91-5223-4f0b-99c0-9c42ce661b3b	na					uuid:67cc2d91-5223-4f0b-99c0-9c42ce661b3b	side_effect					uuid:67cc2d91-5223-4f0b-99c0-9c42ce661b3b	bednets					uuid:67cc2d91-5223-4f0b-99c0-9c42ce661b3b
uuid:67d6bc0b-2d1a-4e47-9d2f-c6ed93a849f5	yes	no	3	yes	yes	119	Dc	Vdhd	female	1	Primary	post	no	post	2	22	Yes	18_29	yes	yes	999	no	not_too_far	yes	uuid:67d6bc0b-2d1a-4e47-9d2f-c6ed93a849f5	pregnant					uuid:67d6bc0b-2d1a-4e47-9d2f-c6ed93a849f5	na					uuid:67d6bc0b-2d1a-4e47-9d2f-c6ed93a849f5	side_effect					uuid:67d6bc0b-2d1a-4e47-9d2f-c6ed93a849f5	unknown					uuid:67d6bc0b-2d1a-4e47-9d2f-c6ed93a849f5
uuid:67e111b0-1f4a-4ee7-9ac3-7f8cb825c99d	yes	no	5	yes	yes	2681	Ca		female	na	No	home	yes	post	3	53	Yes	50_59	yes	yes	999	no	not_too_far	yes	uuid:67e111b0-1f4a-4ee7-9ac3-7f8cb825c99d	pregnant					uuid:67e111b0-1f4a-4ee7-9ac3-7f8cb825c99d	na					uuid:67e111b0-1f4a-4ee7-9ac3-7f8cb825c99d	side_effect					uuid:67e111b0-1f4a-4ee7-9ac3-7f8cb825c99d	clean_water					uuid:67e111b0-1f4a-4ee7-9ac3-7f8cb825c99d
uuid:67ec7750-84e4-42d9-a43e-8abd968a7c50	yes	no	1	yes	yes	278	Sc		male	na	Primary	school	yes	school	2	20	Yes	18_29	yes	yes	999	yes	not_too_far	yes	uuid:67ec7750-84e4-42d9-a43e-8abd968a7c50	pregnant					uuid:67ec7750-84e4-42d9-a43e-8abd968a7c50	action					uuid:67ec7750-84e4-42d9-a43e-8abd968a7c50	na_already_convinced					uuid:67ec7750-84e4-42d9-a43e-8abd968a7c50	clean_water					uuid:67ec7750-84e4-42d9-a43e-8abd968a7c50
uuid:67f0d0a9-142e-44d8-a55c-cd725445c457	na_not_aware_of_post	dk	5	yes	na	154	oe	yo pat bwe medikaman an	female	dk	No	na	no	na	999	20	No	18_29	no	na	999	dk	dk	no	uuid:67f0d0a9-142e-44d8-a55c-cd725445c457	pregnant					uuid:67f0d0a9-142e-44d8-a55c-cd725445c457	na					uuid:67f0d0a9-142e-44d8-a55c-cd725445c457	help_me					uuid:67f0d0a9-142e-44d8-a55c-cd725445c457	n/a					uuid:67f0d0a9-142e-44d8-a55c-cd725445c457
uuid:67f935ab-c224-49e6-ad7d-e4dfc148fc61	yes	no	2	yes	yes	2778	jv		male	na	No	post	yes	post	3	46	Yes	40_49	yes	yes	999	no	close	yes	uuid:67f935ab-c224-49e6-ad7d-e4dfc148fc61	dk					uuid:67f935ab-c224-49e6-ad7d-e4dfc148fc61	na					uuid:67f935ab-c224-49e6-ad7d-e4dfc148fc61	uk					uuid:67f935ab-c224-49e6-ad7d-e4dfc148fc61	unknown					uuid:67f935ab-c224-49e6-ad7d-e4dfc148fc61
uuid:6809b461-0758-41b6-a46e-e9f4f1f05df1	yes	no	1	yes	yes	46	Sf		female	na	No	post	yes	post	2	62	Yes	60_69	yes	yes	999	no	not_too_far	yes	uuid:6809b461-0758-41b6-a46e-e9f4f1f05df1	dk					uuid:6809b461-0758-41b6-a46e-e9f4f1f05df1	na					uuid:6809b461-0758-41b6-a46e-e9f4f1f05df1	na_already_convinced					uuid:6809b461-0758-41b6-a46e-e9f4f1f05df1	unknown					uuid:6809b461-0758-41b6-a46e-e9f4f1f05df1
uuid:681a442e-63fb-4172-bcf9-63ed9ca7db2b	yes	no	2	yes	yes	2780	ro		female	na	No	post	yes	post	2	65	Yes	60_69	yes	yes	999	yes	close	yes	uuid:681a442e-63fb-4172-bcf9-63ed9ca7db2b	dk					uuid:681a442e-63fb-4172-bcf9-63ed9ca7db2b	dk					uuid:681a442e-63fb-4172-bcf9-63ed9ca7db2b	na_already_convinced					uuid:681a442e-63fb-4172-bcf9-63ed9ca7db2b	unknown					uuid:681a442e-63fb-4172-bcf9-63ed9ca7db2b
uuid:684f1923-491f-47f0-80e8-eca6a9acadef	yes	no	1	yes	yes	2675	rp		female	na	No	post	yes	post	2	20	Yes	18_29	yes	yes	999	no	close	yes	uuid:684f1923-491f-47f0-80e8-eca6a9acadef	dk					uuid:684f1923-491f-47f0-80e8-eca6a9acadef	na					uuid:684f1923-491f-47f0-80e8-eca6a9acadef	na_already_convinced					uuid:684f1923-491f-47f0-80e8-eca6a9acadef	iftreat					uuid:684f1923-491f-47f0-80e8-eca6a9acadef
uuid:68606ccc-2149-4425-b072-f34d4ef32195	yes	no	5	yes	yes	1009	Aa		female	na	Some_secondary	post	yes	post	2	37	Yes	30_39	yes	yes	999	no	close	yes	uuid:68606ccc-2149-4425-b072-f34d4ef32195	pregnant					uuid:68606ccc-2149-4425-b072-f34d4ef32195	na					uuid:68606ccc-2149-4425-b072-f34d4ef32195	na_already_convinced					uuid:68606ccc-2149-4425-b072-f34d4ef32195	bednets					uuid:68606ccc-2149-4425-b072-f34d4ef32195
uuid:687b30d9-9dfe-4bb2-a5f7-316ace293e22	yes	no	5	yes	yes	286	Cr		female	na	Some_secondary	post	yes	post	3	27	Yes	18_29	yes	yes	999	no	close	yes	uuid:687b30d9-9dfe-4bb2-a5f7-316ace293e22	pregnant					uuid:687b30d9-9dfe-4bb2-a5f7-316ace293e22	na					uuid:687b30d9-9dfe-4bb2-a5f7-316ace293e22	help_me					uuid:687b30d9-9dfe-4bb2-a5f7-316ace293e22	clean_water					uuid:687b30d9-9dfe-4bb2-a5f7-316ace293e22
uuid:687e1a56-124e-48b1-9a9e-61504256058d	yes	no	3	yes	yes	110	Oc	Bdj	male	1	No	post	yes	post	3	32	Yes	30_39	yes	yes	999	yes	close	yes	uuid:687e1a56-124e-48b1-9a9e-61504256058d	pregnant					uuid:687e1a56-124e-48b1-9a9e-61504256058d	dk					uuid:687e1a56-124e-48b1-9a9e-61504256058d	side_effect					uuid:687e1a56-124e-48b1-9a9e-61504256058d	iftreat					uuid:687e1a56-124e-48b1-9a9e-61504256058d
uuid:689dcf0c-8b6c-4607-8d80-219114058e7a	yes	no	2	yes	yes	2788	Km		female	na	No	post	yes	post	2	40	Yes	40_49	yes	yes	999	no	close	yes	uuid:689dcf0c-8b6c-4607-8d80-219114058e7a	pregnant					uuid:689dcf0c-8b6c-4607-8d80-219114058e7a	na					uuid:689dcf0c-8b6c-4607-8d80-219114058e7a	help_me					uuid:689dcf0c-8b6c-4607-8d80-219114058e7a	clean_water					uuid:689dcf0c-8b6c-4607-8d80-219114058e7a
uuid:69296519-8db1-4527-a0ed-d9c42739edfb	yes	no	3	yes	yes	865	Ae	Jvwt	female	1	Finish_primary	post	no	post	1	25	Yes	18_29	yes	yes	999	yes	not_too_far	yes	uuid:69296519-8db1-4527-a0ed-d9c42739edfb	pregnant					uuid:69296519-8db1-4527-a0ed-d9c42739edfb	dk					uuid:69296519-8db1-4527-a0ed-d9c42739edfb	help_family					uuid:69296519-8db1-4527-a0ed-d9c42739edfb	clean_water					uuid:69296519-8db1-4527-a0ed-d9c42739edfb
uuid:693b97a1-98f5-4c53-aa6d-1d42b5faa073	yes	yes	4	dk	yes	2521	Sp	Gtt	male	3	No	post	yes	post	1	42	Yes	40_49	yes	yes	999	no	not_too_far	yes	uuid:693b97a1-98f5-4c53-aa6d-1d42b5faa073	pregnant					uuid:693b97a1-98f5-4c53-aa6d-1d42b5faa073	na					uuid:693b97a1-98f5-4c53-aa6d-1d42b5faa073	na_already_convinced					uuid:693b97a1-98f5-4c53-aa6d-1d42b5faa073	clean_water					uuid:693b97a1-98f5-4c53-aa6d-1d42b5faa073
uuid:69639cf3-861d-4968-9b8e-c3aab81fb5d7	yes	no	1	yes	yes	2631	mt		male	na	No	post	yes	post	1	67	Yes	60_69	yes	yes	999	yes	not_too_far	yes	uuid:69639cf3-861d-4968-9b8e-c3aab81fb5d7	pregnant					uuid:69639cf3-861d-4968-9b8e-c3aab81fb5d7	action					uuid:69639cf3-861d-4968-9b8e-c3aab81fb5d7	na_already_convinced					uuid:69639cf3-861d-4968-9b8e-c3aab81fb5d7	unknown					uuid:69639cf3-861d-4968-9b8e-c3aab81fb5d7
uuid:69835287-4868-48eb-aa2d-6a268e93e943	yes	yes	2	yes	yes	553	pj		female	1	No	post	yes	post	2	38	Yes	30_39	yes	yes	999	yes	close	yes	uuid:69835287-4868-48eb-aa2d-6a268e93e943	pregnant					uuid:69835287-4868-48eb-aa2d-6a268e93e943	dk					uuid:69835287-4868-48eb-aa2d-6a268e93e943	na_already_convinced					uuid:69835287-4868-48eb-aa2d-6a268e93e943	unknown					uuid:69835287-4868-48eb-aa2d-6a268e93e943
uuid:699d9244-d961-48ed-8a7f-72561c1abb3a	yes	no	5	yes	no	1033	Fm		female	na	Finish_primary	home	yes	home	2	36	Yes	30_39	yes	yes	999	no	close	yes	uuid:699d9244-d961-48ed-8a7f-72561c1abb3a	pregnant					uuid:699d9244-d961-48ed-8a7f-72561c1abb3a	na					uuid:699d9244-d961-48ed-8a7f-72561c1abb3a	help_me					uuid:699d9244-d961-48ed-8a7f-72561c1abb3a	bednets					uuid:699d9244-d961-48ed-8a7f-72561c1abb3a
uuid:69b0b5a7-7434-4a9a-8ef2-629f9cb5164b	yes	no	5	yes	yes	296	Mt		female	na	No	post	yes	post	3	24	Yes	18_29	yes	yes	999	yes	far	yes	uuid:69b0b5a7-7434-4a9a-8ef2-629f9cb5164b	pregnant					uuid:69b0b5a7-7434-4a9a-8ef2-629f9cb5164b	other					uuid:69b0b5a7-7434-4a9a-8ef2-629f9cb5164b	na_already_convinced					uuid:69b0b5a7-7434-4a9a-8ef2-629f9cb5164b	bednets					uuid:69b0b5a7-7434-4a9a-8ef2-629f9cb5164b
uuid:69cb5f50-497b-4d03-88a2-66d85e39d775	yes	no	5	yes	yes	263	Wp		female	na	Some_secondary	post	yes	post	2	25	Yes	18_29	yes	yes	999	yes	close	yes	uuid:69cb5f50-497b-4d03-88a2-66d85e39d775	pregnant					uuid:69cb5f50-497b-4d03-88a2-66d85e39d775	action					uuid:69cb5f50-497b-4d03-88a2-66d85e39d775	help_me					uuid:69cb5f50-497b-4d03-88a2-66d85e39d775	clean_water					uuid:69cb5f50-497b-4d03-88a2-66d85e39d775
uuid:6a1fde37-8f33-4db5-be94-f845d95ee105	yes	no	3	yes	yes	524	Da	Vdh	female	1	Finish_primary	home	yes	post	3	42	Yes	40_49	yes	yes	999	no	close	yes	uuid:6a1fde37-8f33-4db5-be94-f845d95ee105	pregnant					uuid:6a1fde37-8f33-4db5-be94-f845d95ee105	na					uuid:6a1fde37-8f33-4db5-be94-f845d95ee105	help_family					uuid:6a1fde37-8f33-4db5-be94-f845d95ee105	iftreat					uuid:6a1fde37-8f33-4db5-be94-f845d95ee105
uuid:6a397521-88a7-498f-8bd7-7e0f0bbfaec2	yes	no	2	yes	yes	897	fs		female	na	No	post	yes	post	2	45	Yes	40_49	yes	yes	999	yes	close	yes	uuid:6a397521-88a7-498f-8bd7-7e0f0bbfaec2	pregnant					uuid:6a397521-88a7-498f-8bd7-7e0f0bbfaec2	dk					uuid:6a397521-88a7-498f-8bd7-7e0f0bbfaec2	na_already_convinced					uuid:6a397521-88a7-498f-8bd7-7e0f0bbfaec2	unknown					uuid:6a397521-88a7-498f-8bd7-7e0f0bbfaec2
uuid:6a3bc5a9-2034-4366-803f-d044c3a48f8f	dk	dk	3	dk	na	136	Es	Li ye responsab yon malad. Lel gade li we grrnn nan ap jete lot moun li pat vle malad tou	female	dk	No	na	no	na	0	49	Yes	40_49	yes	na	999	na	dk	no	uuid:6a3bc5a9-2034-4366-803f-d044c3a48f8f	pregnant					uuid:6a3bc5a9-2034-4366-803f-d044c3a48f8f	na					uuid:6a3bc5a9-2034-4366-803f-d044c3a48f8f	side_effect					uuid:6a3bc5a9-2034-4366-803f-d044c3a48f8f	iftreat					uuid:6a3bc5a9-2034-4366-803f-d044c3a48f8f
uuid:6a61bd31-5b84-4400-8871-dd8a194e7e15	na_not_aware_of_post	dk	5	yes	na	1053	Dj		female	na	Some_secondary	na	no	na	0	21	No	18_29	yes	na	999	na	na_not_aware_post	yes	uuid:6a61bd31-5b84-4400-8871-dd8a194e7e15	pregnant					uuid:6a61bd31-5b84-4400-8871-dd8a194e7e15	na					uuid:6a61bd31-5b84-4400-8871-dd8a194e7e15	help_me					uuid:6a61bd31-5b84-4400-8871-dd8a194e7e15	bednets					uuid:6a61bd31-5b84-4400-8871-dd8a194e7e15
uuid:6a6e1aa2-1127-4eef-a57a-e8cae1939418	yes	no	3	yes	yes	144	gg	vffd	female	1	Finish_secondary	post	yes	post	3	28	Yes	18_29	yes	yes	999	no	not_too_far	yes	uuid:6a6e1aa2-1127-4eef-a57a-e8cae1939418	Sick					uuid:6a6e1aa2-1127-4eef-a57a-e8cae1939418	na					uuid:6a6e1aa2-1127-4eef-a57a-e8cae1939418	help_me					uuid:6a6e1aa2-1127-4eef-a57a-e8cae1939418	iftreat					uuid:6a6e1aa2-1127-4eef-a57a-e8cae1939418
uuid:6a8f1442-e7bb-4634-b3ab-a0c2e2f8b4af	yes	no	3	yes	yes	623	Rv	Bfh	female	1	No	post	dk	post	999	52	Yes	50_59	yes	yes	999	yes	close	yes	uuid:6a8f1442-e7bb-4634-b3ab-a0c2e2f8b4af	dk					uuid:6a8f1442-e7bb-4634-b3ab-a0c2e2f8b4af	dk					uuid:6a8f1442-e7bb-4634-b3ab-a0c2e2f8b4af	help_me					uuid:6a8f1442-e7bb-4634-b3ab-a0c2e2f8b4af	iftreat					uuid:6a8f1442-e7bb-4634-b3ab-a0c2e2f8b4af
uuid:6acb00db-07b7-4d7a-b8f8-6d40b2029190	yes	dk	5	yes	yes	263	Ff		female	na	No	post	yes	post	3	999	Yes	60_69	yes	yes	999	no	not_too_far	yes	uuid:6acb00db-07b7-4d7a-b8f8-6d40b2029190	dk					uuid:6acb00db-07b7-4d7a-b8f8-6d40b2029190	na					uuid:6acb00db-07b7-4d7a-b8f8-6d40b2029190	help_me					uuid:6acb00db-07b7-4d7a-b8f8-6d40b2029190	unknown					uuid:6acb00db-07b7-4d7a-b8f8-6d40b2029190
uuid:6ad2b6c4-f0e2-4a91-ae51-520f1f5b3ebe	yes	no	5	yes	yes	211	Iv		female	1	No	post	yes	post	3	45	Yes	40_49	yes	yes	999	no	close	yes	uuid:6ad2b6c4-f0e2-4a91-ae51-520f1f5b3ebe	dk					uuid:6ad2b6c4-f0e2-4a91-ae51-520f1f5b3ebe	na					uuid:6ad2b6c4-f0e2-4a91-ae51-520f1f5b3ebe	uk					uuid:6ad2b6c4-f0e2-4a91-ae51-520f1f5b3ebe	n/a					uuid:6ad2b6c4-f0e2-4a91-ae51-520f1f5b3ebe
uuid:6ad8b912-cb52-4b8a-992d-af65929f5c63	yes	no	5	yes	yes	305	Gs		female	na	No	post	yes	post	2	65	Yes	60_69	yes	yes	999	yes	not_too_far	yes	uuid:6ad8b912-cb52-4b8a-992d-af65929f5c63	pregnant					uuid:6ad8b912-cb52-4b8a-992d-af65929f5c63	dk					uuid:6ad8b912-cb52-4b8a-992d-af65929f5c63	side_effect					uuid:6ad8b912-cb52-4b8a-992d-af65929f5c63	clean_water					uuid:6ad8b912-cb52-4b8a-992d-af65929f5c63
uuid:6ae14ac3-30e8-4b53-863e-3113c9973b80	yes	no	2	yes	yes	2840	cj		male	na	Primary	post	yes	post	2	85	Yes	80_89	yes	yes	999	no	close	yes	uuid:6ae14ac3-30e8-4b53-863e-3113c9973b80	pregnant					uuid:6ae14ac3-30e8-4b53-863e-3113c9973b80	na					uuid:6ae14ac3-30e8-4b53-863e-3113c9973b80	na_already_convinced					uuid:6ae14ac3-30e8-4b53-863e-3113c9973b80	clean_water					uuid:6ae14ac3-30e8-4b53-863e-3113c9973b80
uuid:6b08a1c1-1a79-4bee-8aa0-ad05e7ef6336	dk	dk	3	yes	dk	138	Gm	Gduf	male	dk	Primary	home	yes	post	3	32	Yes	30_39	yes	yes	999	yes	dk	yes	uuid:6b08a1c1-1a79-4bee-8aa0-ad05e7ef6336	pregnant					uuid:6b08a1c1-1a79-4bee-8aa0-ad05e7ef6336	dk					uuid:6b08a1c1-1a79-4bee-8aa0-ad05e7ef6336	help_family					uuid:6b08a1c1-1a79-4bee-8aa0-ad05e7ef6336	clean_water					uuid:6b08a1c1-1a79-4bee-8aa0-ad05e7ef6336
uuid:6b1a0529-06e4-483b-a43b-ba07985d701e	other	dk	5	other	other	271	Sd	Moun nan soud	male	na	No	other	yes	other	2	80	DK	80_89	no	na	999	na	other	unknown	uuid:6b1a0529-06e4-483b-a43b-ba07985d701e	dk					uuid:6b1a0529-06e4-483b-a43b-ba07985d701e	other					uuid:6b1a0529-06e4-483b-a43b-ba07985d701e	uk					uuid:6b1a0529-06e4-483b-a43b-ba07985d701e	n/a					uuid:6b1a0529-06e4-483b-a43b-ba07985d701e
uuid:6b39bdb3-b6a2-432f-9b04-40e7242dd30c	yes	no	5	yes	yes	252	Vd		female	na	Primary	post	yes	post	3	50	Yes	50_59	yes	yes	999	no	not_too_far	yes	uuid:6b39bdb3-b6a2-432f-9b04-40e7242dd30c	dk					uuid:6b39bdb3-b6a2-432f-9b04-40e7242dd30c	na					uuid:6b39bdb3-b6a2-432f-9b04-40e7242dd30c	help_me					uuid:6b39bdb3-b6a2-432f-9b04-40e7242dd30c	n/a					uuid:6b39bdb3-b6a2-432f-9b04-40e7242dd30c
uuid:6b943e81-16fb-4ded-becb-b3a2cf458329	na_not_aware_of_post	no	1	yes	yes	579	Jr		female	na	Some_secondary	school	yes	school	1	19	Yes	18_29	yes	yes	999	yes	na_not_aware_post	yes	uuid:6b943e81-16fb-4ded-becb-b3a2cf458329	pregnant					uuid:6b943e81-16fb-4ded-becb-b3a2cf458329	not_eat					uuid:6b943e81-16fb-4ded-becb-b3a2cf458329	na_already_convinced					uuid:6b943e81-16fb-4ded-becb-b3a2cf458329	other					uuid:6b943e81-16fb-4ded-becb-b3a2cf458329
uuid:6ba2831b-116b-438f-a1bd-31d035b86e0d	yes	no	1	yes	yes	11	Dl		female	na	Some_secondary	home	yes	post	1	24	Yes	18_29	yes	yes	999	yes	close	yes	uuid:6ba2831b-116b-438f-a1bd-31d035b86e0d	pregnant					uuid:6ba2831b-116b-438f-a1bd-31d035b86e0d	action					uuid:6ba2831b-116b-438f-a1bd-31d035b86e0d	na_already_convinced					uuid:6ba2831b-116b-438f-a1bd-31d035b86e0d	clean_water					uuid:6ba2831b-116b-438f-a1bd-31d035b86e0d
uuid:6baac8a6-eb72-4a44-be0e-5bccab2d9032	yes	no	1	yes	yes	2633	ap		male	na	Primary	post	yes	post	1	51	Yes	50_59	yes	yes	999	no	close	yes	uuid:6baac8a6-eb72-4a44-be0e-5bccab2d9032	dk					uuid:6baac8a6-eb72-4a44-be0e-5bccab2d9032	na					uuid:6baac8a6-eb72-4a44-be0e-5bccab2d9032	na_already_convinced					uuid:6baac8a6-eb72-4a44-be0e-5bccab2d9032	clean_water					uuid:6baac8a6-eb72-4a44-be0e-5bccab2d9032
uuid:6becf5cf-0eb9-451e-abd5-077b9b27c452	no	yes	1	yes	na	15	Lt		male	dk	No	na	no	na	0	999	Yes	60_69	yes	no	999	na	na_not_aware_post	no	uuid:6becf5cf-0eb9-451e-abd5-077b9b27c452	dk					uuid:6becf5cf-0eb9-451e-abd5-077b9b27c452	na					uuid:6becf5cf-0eb9-451e-abd5-077b9b27c452	uk					uuid:6becf5cf-0eb9-451e-abd5-077b9b27c452	unknown					uuid:6becf5cf-0eb9-451e-abd5-077b9b27c452
uuid:6c4ed7b8-4c32-4d61-beb3-3d13b56a1994	yes	dk	4	yes	yes	366	Jp	Er	male	na	No	post	yes	post	2	70	Yes	70_79	yes	yes	999	yes	close	yes	uuid:6c4ed7b8-4c32-4d61-beb3-3d13b56a1994	dk					uuid:6c4ed7b8-4c32-4d61-beb3-3d13b56a1994	action					uuid:6c4ed7b8-4c32-4d61-beb3-3d13b56a1994	help_family					uuid:6c4ed7b8-4c32-4d61-beb3-3d13b56a1994	clean_water					uuid:6c4ed7b8-4c32-4d61-beb3-3d13b56a1994
uuid:6c9ba830-f927-4639-8b65-29fc502a7a14	yes	no	5	yes	yes	248	Km	Li t fe l toudi	female	na	Some_secondary	post	yes	post	3	23	Yes	18_29	yes	yes	999	yes	close	yes	uuid:6c9ba830-f927-4639-8b65-29fc502a7a14	pregnant					uuid:6c9ba830-f927-4639-8b65-29fc502a7a14	dk					uuid:6c9ba830-f927-4639-8b65-29fc502a7a14	help_me					uuid:6c9ba830-f927-4639-8b65-29fc502a7a14	bednets					uuid:6c9ba830-f927-4639-8b65-29fc502a7a14
uuid:6cf53021-e15b-43d4-93c5-0b445449da5a	yes	no	5	yes	yes	1068	Sv		female	na	Primary	post	yes	post	3	31	Yes	30_39	yes	yes	999	no	close	yes	uuid:6cf53021-e15b-43d4-93c5-0b445449da5a	pregnant					uuid:6cf53021-e15b-43d4-93c5-0b445449da5a	na					uuid:6cf53021-e15b-43d4-93c5-0b445449da5a	side_effect					uuid:6cf53021-e15b-43d4-93c5-0b445449da5a	clean_water					uuid:6cf53021-e15b-43d4-93c5-0b445449da5a
uuid:6cf639f8-7b31-4399-9755-b40f1e9330a8	yes	no	2	yes	yes	342	ep		female	na	Some_secondary	post	yes	post	4	28	Yes	18_29	yes	yes	999	yes	close	yes	uuid:6cf639f8-7b31-4399-9755-b40f1e9330a8	pregnant					uuid:6cf639f8-7b31-4399-9755-b40f1e9330a8	dk					uuid:6cf639f8-7b31-4399-9755-b40f1e9330a8	uk					uuid:6cf639f8-7b31-4399-9755-b40f1e9330a8	clean_water					uuid:6cf639f8-7b31-4399-9755-b40f1e9330a8
uuid:6d12aae5-953d-4ac1-b6b4-c95a9ee514a8	yes	no	2	yes	yes	260	gj		male	na	Primary	post	yes	post	3	25	Yes	18_29	yes	yes	999	yes	close	yes	uuid:6d12aae5-953d-4ac1-b6b4-c95a9ee514a8	pregnant					uuid:6d12aae5-953d-4ac1-b6b4-c95a9ee514a8	dk					uuid:6d12aae5-953d-4ac1-b6b4-c95a9ee514a8	uk					uuid:6d12aae5-953d-4ac1-b6b4-c95a9ee514a8	unknown					uuid:6d12aae5-953d-4ac1-b6b4-c95a9ee514a8
uuid:6d17fd98-6a35-44b1-99a9-70c60ac5ecf2	yes	no	3	yes	yes	525	Lj	Bgid	female	1	No	post	no	post	2	60	Yes	60_69	yes	yes	999	no	close	yes	uuid:6d17fd98-6a35-44b1-99a9-70c60ac5ecf2	pregnant					uuid:6d17fd98-6a35-44b1-99a9-70c60ac5ecf2	na					uuid:6d17fd98-6a35-44b1-99a9-70c60ac5ecf2	help_me					uuid:6d17fd98-6a35-44b1-99a9-70c60ac5ecf2	unknown					uuid:6d17fd98-6a35-44b1-99a9-70c60ac5ecf2
uuid:6d342b61-3fbd-4a7c-bd13-e5d61317f693	yes	no	1	yes	yes	575	Eo		female	na	No	post	no	post	0	64	Yes	60_69	yes	yes	999	no	close	yes	uuid:6d342b61-3fbd-4a7c-bd13-e5d61317f693	Sick					uuid:6d342b61-3fbd-4a7c-bd13-e5d61317f693	na					uuid:6d342b61-3fbd-4a7c-bd13-e5d61317f693	na_already_convinced					uuid:6d342b61-3fbd-4a7c-bd13-e5d61317f693	other					uuid:6d342b61-3fbd-4a7c-bd13-e5d61317f693
uuid:6d7b8a0d-c9cf-4173-a1e1-22d1f40ee86f	yes	dk	4	yes	yes	2724	Sc	Oi	female	na	No	post	yes	post	2	55	Yes	50_59	yes	yes	5	yes	close	yes	uuid:6d7b8a0d-c9cf-4173-a1e1-22d1f40ee86f	pregnant					uuid:6d7b8a0d-c9cf-4173-a1e1-22d1f40ee86f	action					uuid:6d7b8a0d-c9cf-4173-a1e1-22d1f40ee86f	help_me					uuid:6d7b8a0d-c9cf-4173-a1e1-22d1f40ee86f	bednets					uuid:6d7b8a0d-c9cf-4173-a1e1-22d1f40ee86f
uuid:6d86719f-4233-4847-89aa-6541d8f772ab	dk	dk	3	yes	na	146	Sl	Dds	female	dk	No	na	no	na	1	36	Yes	30_39	yes	na	999	na	dk	no	uuid:6d86719f-4233-4847-89aa-6541d8f772ab	pregnant					uuid:6d86719f-4233-4847-89aa-6541d8f772ab	na					uuid:6d86719f-4233-4847-89aa-6541d8f772ab	help_me					uuid:6d86719f-4233-4847-89aa-6541d8f772ab	unknown					uuid:6d86719f-4233-4847-89aa-6541d8f772ab
uuid:6de8737e-4c43-430c-8743-50002f920c3c	na_not_aware_of_post	dk	3	dk	na	2796	Tg	Gfh	female	na	Finish_primary	na	no	na	0	21	No	18_29	yes	na	999	na	na_not_aware_post	no	uuid:6de8737e-4c43-430c-8743-50002f920c3c	pregnant					uuid:6de8737e-4c43-430c-8743-50002f920c3c	na					uuid:6de8737e-4c43-430c-8743-50002f920c3c	side_effect					uuid:6de8737e-4c43-430c-8743-50002f920c3c	unknown					uuid:6de8737e-4c43-430c-8743-50002f920c3c
uuid:6e0156da-d2df-482a-9a01-b85946f8e433	yes	no	2	yes	yes	2791	wt		female	na	No	post	yes	post	2	45	Yes	40_49	yes	yes	999	no	close	yes	uuid:6e0156da-d2df-482a-9a01-b85946f8e433	dk					uuid:6e0156da-d2df-482a-9a01-b85946f8e433	na					uuid:6e0156da-d2df-482a-9a01-b85946f8e433	na_already_convinced					uuid:6e0156da-d2df-482a-9a01-b85946f8e433	unknown					uuid:6e0156da-d2df-482a-9a01-b85946f8e433
uuid:6e3dc864-0e4a-4170-87f0-3ae3249abb89	yes	no	2	yes	yes	2843	fl		male	na	University	post	yes	post	2	45	Yes	40_49	yes	yes	999	yes	close	yes	uuid:6e3dc864-0e4a-4170-87f0-3ae3249abb89	pregnant					uuid:6e3dc864-0e4a-4170-87f0-3ae3249abb89	dk					uuid:6e3dc864-0e4a-4170-87f0-3ae3249abb89	uk					uuid:6e3dc864-0e4a-4170-87f0-3ae3249abb89	clean_water					uuid:6e3dc864-0e4a-4170-87f0-3ae3249abb89
uuid:6e84b901-dc3e-4724-bf9a-93f12c843aac	yes	dk	4	yes	no	342	Af	Ok	female	na	No	post	yes	post	3	56	Yes	50_59	yes	yes	5	yes	close	yes	uuid:6e84b901-dc3e-4724-bf9a-93f12c843aac	pregnant					uuid:6e84b901-dc3e-4724-bf9a-93f12c843aac	na					uuid:6e84b901-dc3e-4724-bf9a-93f12c843aac	help_me					uuid:6e84b901-dc3e-4724-bf9a-93f12c843aac	mosquito					uuid:6e84b901-dc3e-4724-bf9a-93f12c843aac
uuid:6ee651cc-c858-42b9-bfd7-b4773e4822da	dk	dk	2	yes	na	2853	gb		female	na	No	na	no	na	0	80	Yes	80_89	yes	na	999	na	dk	no	uuid:6ee651cc-c858-42b9-bfd7-b4773e4822da	dk					uuid:6ee651cc-c858-42b9-bfd7-b4773e4822da	na					uuid:6ee651cc-c858-42b9-bfd7-b4773e4822da	uk					uuid:6ee651cc-c858-42b9-bfd7-b4773e4822da	unknown					uuid:6ee651cc-c858-42b9-bfd7-b4773e4822da
uuid:6ee8ea59-defa-483d-97d3-50b32b0fe197	na_not_aware_of_post	dk	4	yes	na	157	J n		female	na	No	na	no	na	999	24	No	18_29	no	na	999	na	na_not_aware_post	no	uuid:6ee8ea59-defa-483d-97d3-50b32b0fe197	dk					uuid:6ee8ea59-defa-483d-97d3-50b32b0fe197	na					uuid:6ee8ea59-defa-483d-97d3-50b32b0fe197	help_me					uuid:6ee8ea59-defa-483d-97d3-50b32b0fe197	n/a					uuid:6ee8ea59-defa-483d-97d3-50b32b0fe197
uuid:6f11acb1-acc3-4262-a3e9-4ad13472dfad	yes	no	5	yes	yes	2691	Ge		female	na	Primary	post	yes	post	2	41	Yes	40_49	yes	yes	999	no	close	yes	uuid:6f11acb1-acc3-4262-a3e9-4ad13472dfad	pregnant					uuid:6f11acb1-acc3-4262-a3e9-4ad13472dfad	na					uuid:6f11acb1-acc3-4262-a3e9-4ad13472dfad	side_effect					uuid:6f11acb1-acc3-4262-a3e9-4ad13472dfad	clean_water					uuid:6f11acb1-acc3-4262-a3e9-4ad13472dfad
uuid:6f11fe15-0592-4cd6-ae03-80ee388177ca	yes	no	4	yes	yes	207	F a		female	na	No	post	yes	post	2	65	Yes	60_69	yes	yes	999	no	not_too_far	yes	uuid:6f11fe15-0592-4cd6-ae03-80ee388177ca	pregnant					uuid:6f11fe15-0592-4cd6-ae03-80ee388177ca	na					uuid:6f11fe15-0592-4cd6-ae03-80ee388177ca	help_family					uuid:6f11fe15-0592-4cd6-ae03-80ee388177ca	unknown					uuid:6f11fe15-0592-4cd6-ae03-80ee388177ca
uuid:6f15005e-d5fd-4878-8158-558699c5255b	yes	no	1	yes	yes	2596	lu		female	na	Some_secondary	post	yes	post	1	25	Yes	18_29	yes	yes	999	no	not_too_far	yes	uuid:6f15005e-d5fd-4878-8158-558699c5255b	pregnant					uuid:6f15005e-d5fd-4878-8158-558699c5255b	na					uuid:6f15005e-d5fd-4878-8158-558699c5255b	na_already_convinced					uuid:6f15005e-d5fd-4878-8158-558699c5255b	clean_water					uuid:6f15005e-d5fd-4878-8158-558699c5255b
uuid:6f1ec292-c123-46ae-ba10-ef8705e38094	yes	no	5	yes	yes	2684	Aj		male	na	No	post	yes	post	2	54	Yes	50_59	no	yes	999	no	not_too_far	yes	uuid:6f1ec292-c123-46ae-ba10-ef8705e38094	dk					uuid:6f1ec292-c123-46ae-ba10-ef8705e38094	na					uuid:6f1ec292-c123-46ae-ba10-ef8705e38094	uk					uuid:6f1ec292-c123-46ae-ba10-ef8705e38094	n/a					uuid:6f1ec292-c123-46ae-ba10-ef8705e38094
uuid:6f31abb7-76a3-4baa-b272-b3e3b1d3e569	yes	no	2	yes	yes	53	lo		female	na	Some_secondary	school	yes	school	2	21	Yes	18_29	yes	yes	999	yes	close	yes	uuid:6f31abb7-76a3-4baa-b272-b3e3b1d3e569	pregnant					uuid:6f31abb7-76a3-4baa-b272-b3e3b1d3e569	dk					uuid:6f31abb7-76a3-4baa-b272-b3e3b1d3e569	uk					uuid:6f31abb7-76a3-4baa-b272-b3e3b1d3e569	bednets					uuid:6f31abb7-76a3-4baa-b272-b3e3b1d3e569
uuid:6f325715-e47a-4ed2-8beb-5b3c696d2ae5	na_not_aware_of_post	dk	4	yes	na	160	K j		male	na	No	na	no	na	999	60	No	60_69	no	na	999	na	na_not_aware_post	no	uuid:6f325715-e47a-4ed2-8beb-5b3c696d2ae5	dk					uuid:6f325715-e47a-4ed2-8beb-5b3c696d2ae5	na					uuid:6f325715-e47a-4ed2-8beb-5b3c696d2ae5	help_me					uuid:6f325715-e47a-4ed2-8beb-5b3c696d2ae5	n/a					uuid:6f325715-e47a-4ed2-8beb-5b3c696d2ae5
uuid:6f3536b4-56ad-432c-afb9-0189a85096b5	yes	no	2	yes	yes	936	jv		female	na	Some_secondary	post	yes	post	2	22	Yes	18_29	yes	yes	999	yes	close	yes	uuid:6f3536b4-56ad-432c-afb9-0189a85096b5	pregnant					uuid:6f3536b4-56ad-432c-afb9-0189a85096b5	dk					uuid:6f3536b4-56ad-432c-afb9-0189a85096b5	na_already_convinced					uuid:6f3536b4-56ad-432c-afb9-0189a85096b5	clean_water					uuid:6f3536b4-56ad-432c-afb9-0189a85096b5
uuid:6fc7d935-b2c4-4d63-8218-52a0168bc098	yes	no	3	yes	yes	107	Ce	Gfht	male	1	Primary	post	yes	post	3	41	Yes	40_49	yes	yes	999	no	not_too_far	yes	uuid:6fc7d935-b2c4-4d63-8218-52a0168bc098	pregnant					uuid:6fc7d935-b2c4-4d63-8218-52a0168bc098	na					uuid:6fc7d935-b2c4-4d63-8218-52a0168bc098	side_effect					uuid:6fc7d935-b2c4-4d63-8218-52a0168bc098	clean_water					uuid:6fc7d935-b2c4-4d63-8218-52a0168bc098
uuid:6ff55d89-f760-4fa2-93e5-922bf965dc7f	yes	no	2	yes	yes	81	rj		female	na	Primary	post	yes	post	2	33	Yes	30_39	yes	yes	999	yes	not_too_far	yes	uuid:6ff55d89-f760-4fa2-93e5-922bf965dc7f	pregnant					uuid:6ff55d89-f760-4fa2-93e5-922bf965dc7f	dk					uuid:6ff55d89-f760-4fa2-93e5-922bf965dc7f	uk					uuid:6ff55d89-f760-4fa2-93e5-922bf965dc7f	clean_water					uuid:6ff55d89-f760-4fa2-93e5-922bf965dc7f
uuid:702708e1-dba8-4788-9a8e-632c9fd3e968	yes	no	2	yes	yes	551	cl		female	na	No	post	yes	post	2	63	Yes	60_69	yes	yes	999	no	close	yes	uuid:702708e1-dba8-4788-9a8e-632c9fd3e968	dk					uuid:702708e1-dba8-4788-9a8e-632c9fd3e968	na					uuid:702708e1-dba8-4788-9a8e-632c9fd3e968	na_already_convinced					uuid:702708e1-dba8-4788-9a8e-632c9fd3e968	unknown					uuid:702708e1-dba8-4788-9a8e-632c9fd3e968
uuid:70342ed0-3585-46fb-9c12-05d59e9fc745	yes	no	5	yes	yes	308	Ws		female	na	Some_secondary	post	yes	post	3	25	Yes	18_29	yes	yes	999	no	close	yes	uuid:70342ed0-3585-46fb-9c12-05d59e9fc745	pregnant					uuid:70342ed0-3585-46fb-9c12-05d59e9fc745	na					uuid:70342ed0-3585-46fb-9c12-05d59e9fc745	na_already_convinced					uuid:70342ed0-3585-46fb-9c12-05d59e9fc745	bednets					uuid:70342ed0-3585-46fb-9c12-05d59e9fc745
uuid:703ee63f-849e-4123-9196-df13bb8ddac4	yes	no	2	yes	yes	923	fe		male	na	Some_secondary	post	yes	post	2	32	Yes	30_39	yes	yes	999	yes	close	yes	uuid:703ee63f-849e-4123-9196-df13bb8ddac4	pregnant					uuid:703ee63f-849e-4123-9196-df13bb8ddac4	dk					uuid:703ee63f-849e-4123-9196-df13bb8ddac4	side_effect					uuid:703ee63f-849e-4123-9196-df13bb8ddac4	clean_water					uuid:703ee63f-849e-4123-9196-df13bb8ddac4
uuid:704c5c30-3315-4592-a532-385b74c37b8b	na_not_aware_of_post	dk	3	dk	na	126	Bp	Vsh	female	na	No	na	no	dk	0	78	No	70_79	no	dk	999	na	na_not_aware_post	no	uuid:704c5c30-3315-4592-a532-385b74c37b8b	other					uuid:704c5c30-3315-4592-a532-385b74c37b8b	na					uuid:704c5c30-3315-4592-a532-385b74c37b8b	other					uuid:704c5c30-3315-4592-a532-385b74c37b8b	n/a					uuid:704c5c30-3315-4592-a532-385b74c37b8b
uuid:704d160d-669f-4757-8d55-8ed36703bf6e	yes	no	5	yes	yes	2692	Mf		female	na	Some_secondary	post	yes	post	2	36	Yes	30_39	yes	yes	999	no	close	yes	uuid:704d160d-669f-4757-8d55-8ed36703bf6e	pregnant					uuid:704d160d-669f-4757-8d55-8ed36703bf6e	na					uuid:704d160d-669f-4757-8d55-8ed36703bf6e	na_already_convinced					uuid:704d160d-669f-4757-8d55-8ed36703bf6e	clean_water					uuid:704d160d-669f-4757-8d55-8ed36703bf6e
uuid:705b24e3-8d8c-4092-aaf0-cd29e09a0a1c	dk	dk	4	yes	na	207	J n	Li te pran l port au prince	male	na	Finish_primary	na	no	na	999	23	Yes	18_29	yes	na	999	na	dk	no	uuid:705b24e3-8d8c-4092-aaf0-cd29e09a0a1c	Children_under_1					uuid:705b24e3-8d8c-4092-aaf0-cd29e09a0a1c	na					uuid:705b24e3-8d8c-4092-aaf0-cd29e09a0a1c	help_me					uuid:705b24e3-8d8c-4092-aaf0-cd29e09a0a1c	unknown					uuid:705b24e3-8d8c-4092-aaf0-cd29e09a0a1c
uuid:7066aea7-1e97-4ab2-90ee-33118c5031fc	yes	no	4	yes	yes	170	R b		female	na	Primary	post	no	post	999	23	No	18_29	no	yes	999	no	not_too_far	yes	uuid:7066aea7-1e97-4ab2-90ee-33118c5031fc	dk					uuid:7066aea7-1e97-4ab2-90ee-33118c5031fc	na					uuid:7066aea7-1e97-4ab2-90ee-33118c5031fc	help_me					uuid:7066aea7-1e97-4ab2-90ee-33118c5031fc	n/a					uuid:7066aea7-1e97-4ab2-90ee-33118c5031fc
uuid:70671b1e-953d-4472-a500-b835148f6935	yes	no	4	yes	yes	213	F j		female	na	No	post	yes	post	999	22	Yes	18_29	yes	yes	999	no	not_too_far	yes	uuid:70671b1e-953d-4472-a500-b835148f6935	pregnant					uuid:70671b1e-953d-4472-a500-b835148f6935	na					uuid:70671b1e-953d-4472-a500-b835148f6935	help_me					uuid:70671b1e-953d-4472-a500-b835148f6935	unknown					uuid:70671b1e-953d-4472-a500-b835148f6935
uuid:70765f26-5e88-498b-9b16-e555cecdb75e	yes	no	5	yes	yes	1012	Jm		female	na	Primary	post	yes	post	2	44	Yes	40_49	yes	yes	999	no	close	yes	uuid:70765f26-5e88-498b-9b16-e555cecdb75e	pregnant					uuid:70765f26-5e88-498b-9b16-e555cecdb75e	na					uuid:70765f26-5e88-498b-9b16-e555cecdb75e	na_already_convinced					uuid:70765f26-5e88-498b-9b16-e555cecdb75e	bednets					uuid:70765f26-5e88-498b-9b16-e555cecdb75e
uuid:7077b197-b5da-4dda-a1d2-89dab7730116	yes	no	5	yes	yes	214	Tt		male	na	No	post	yes	post	2	40	Yes	40_49	yes	yes	999	no	close	yes	uuid:7077b197-b5da-4dda-a1d2-89dab7730116	pregnant					uuid:7077b197-b5da-4dda-a1d2-89dab7730116	na					uuid:7077b197-b5da-4dda-a1d2-89dab7730116	side_effect					uuid:7077b197-b5da-4dda-a1d2-89dab7730116	unknown					uuid:7077b197-b5da-4dda-a1d2-89dab7730116
uuid:70818457-b4a0-4d7e-81f8-968f7be47a2f	yes	no	2	yes	yes	452	pd		male	na	No	post	yes	post	3	39	Yes	30_39	yes	yes	999	yes	close	yes	uuid:70818457-b4a0-4d7e-81f8-968f7be47a2f	pregnant					uuid:70818457-b4a0-4d7e-81f8-968f7be47a2f	not_eat					uuid:70818457-b4a0-4d7e-81f8-968f7be47a2f	na_already_convinced					uuid:70818457-b4a0-4d7e-81f8-968f7be47a2f	unknown					uuid:70818457-b4a0-4d7e-81f8-968f7be47a2f
uuid:7093973a-40a3-42c1-a997-ffb81a8fe6af	yes	no	5	yes	yes	2715	Es		male	na	Some_secondary	post	yes	post	3	52	Yes	50_59	yes	yes	999	no	close	yes	uuid:7093973a-40a3-42c1-a997-ffb81a8fe6af	pregnant					uuid:7093973a-40a3-42c1-a997-ffb81a8fe6af	na					uuid:7093973a-40a3-42c1-a997-ffb81a8fe6af	side_effect					uuid:7093973a-40a3-42c1-a997-ffb81a8fe6af	bednets					uuid:7093973a-40a3-42c1-a997-ffb81a8fe6af
uuid:70ea82ad-b889-4d2e-8020-87d75044646c	yes	dk	4	yes	yes	363	Tc	Oo	male	na	Primary	post	yes	post	1	35	Yes	30_39	yes	yes	999	no	close	yes	uuid:70ea82ad-b889-4d2e-8020-87d75044646c	pregnant					uuid:70ea82ad-b889-4d2e-8020-87d75044646c	na					uuid:70ea82ad-b889-4d2e-8020-87d75044646c	help_me					uuid:70ea82ad-b889-4d2e-8020-87d75044646c	clean_water					uuid:70ea82ad-b889-4d2e-8020-87d75044646c
uuid:7105a624-349d-406b-94e2-3380694b8bdc	yes	no	2	yes	yes	2758	jr		female	na	Some_secondary	post	yes	post	3	18	Yes	18_29	yes	yes	999	no	close	yes	uuid:7105a624-349d-406b-94e2-3380694b8bdc	pregnant					uuid:7105a624-349d-406b-94e2-3380694b8bdc	na					uuid:7105a624-349d-406b-94e2-3380694b8bdc	na_already_convinced					uuid:7105a624-349d-406b-94e2-3380694b8bdc	clean_water					uuid:7105a624-349d-406b-94e2-3380694b8bdc
uuid:710a16b3-e3e7-441e-bc0d-e0a5056ec143	yes	dk	4	yes	yes	2722	Rb	Er	male	na	Primary	post	yes	post	2	32	Yes	30_39	yes	yes	5	yes	close	yes	uuid:710a16b3-e3e7-441e-bc0d-e0a5056ec143	pregnant					uuid:710a16b3-e3e7-441e-bc0d-e0a5056ec143	action					uuid:710a16b3-e3e7-441e-bc0d-e0a5056ec143	help_me					uuid:710a16b3-e3e7-441e-bc0d-e0a5056ec143	clean_water					uuid:710a16b3-e3e7-441e-bc0d-e0a5056ec143
uuid:7118292b-fa25-4c26-921c-6c4b1a60eb02	yes	no	2	yes	yes	903	jc		female	na	Primary	post	yes	post	2	60	Yes	60_69	yes	yes	999	no	close	yes	uuid:7118292b-fa25-4c26-921c-6c4b1a60eb02	pregnant					uuid:7118292b-fa25-4c26-921c-6c4b1a60eb02	na					uuid:7118292b-fa25-4c26-921c-6c4b1a60eb02	na_already_convinced					uuid:7118292b-fa25-4c26-921c-6c4b1a60eb02	unknown					uuid:7118292b-fa25-4c26-921c-6c4b1a60eb02
uuid:7141d4f3-6089-4578-8a36-8b4c9c5b1b13	na_not_aware_of_post	dk	5	yes	na	292	Mm		female	na	Some_secondary	na	no	na	0	24	No	18_29	no	na	999	na	na_not_aware_post	no	uuid:7141d4f3-6089-4578-8a36-8b4c9c5b1b13	dk					uuid:7141d4f3-6089-4578-8a36-8b4c9c5b1b13	na					uuid:7141d4f3-6089-4578-8a36-8b4c9c5b1b13	help_me					uuid:7141d4f3-6089-4578-8a36-8b4c9c5b1b13	n/a					uuid:7141d4f3-6089-4578-8a36-8b4c9c5b1b13
uuid:715075e7-c63a-46c7-a47e-3e563d09368f	yes	no	3	yes	yes	506	br	bdu	male	1	Some_secondary	post	yes	post	3	33	Yes	30_39	yes	yes	999	no	close	yes	uuid:715075e7-c63a-46c7-a47e-3e563d09368f	pregnant					uuid:715075e7-c63a-46c7-a47e-3e563d09368f	na					uuid:715075e7-c63a-46c7-a47e-3e563d09368f	side_effect					uuid:715075e7-c63a-46c7-a47e-3e563d09368f	iftreat					uuid:715075e7-c63a-46c7-a47e-3e563d09368f
uuid:71ab4560-90c2-47e2-8cd3-14292c0fa405	na_not_aware_of_post	dk	5	no	na	315	Nj		female	na	Some_secondary	na	no	post	0	25	Yes	18_29	yes	yes	0	na	na_not_aware_post	yes	uuid:71ab4560-90c2-47e2-8cd3-14292c0fa405	pregnant					uuid:71ab4560-90c2-47e2-8cd3-14292c0fa405	na					uuid:71ab4560-90c2-47e2-8cd3-14292c0fa405	uk					uuid:71ab4560-90c2-47e2-8cd3-14292c0fa405	bednets					uuid:71ab4560-90c2-47e2-8cd3-14292c0fa405
uuid:71b6d0e2-ad0d-42e2-8db6-8f36608bb8e8	yes	no	2	yes	yes	56	fj		female	na	Primary	post	yes	post	3	70	Yes	70_79	yes	yes	1	no	close	yes	uuid:71b6d0e2-ad0d-42e2-8db6-8f36608bb8e8	pregnant					uuid:71b6d0e2-ad0d-42e2-8db6-8f36608bb8e8	na					uuid:71b6d0e2-ad0d-42e2-8db6-8f36608bb8e8	uk					uuid:71b6d0e2-ad0d-42e2-8db6-8f36608bb8e8	clean_water					uuid:71b6d0e2-ad0d-42e2-8db6-8f36608bb8e8
uuid:71d3285b-10e1-4faa-bc65-c7d2d765da49	yes	no	3	yes	yes	624	Dj	Fj	female	2	No	post	yes	post	3	58	Yes	50_59	yes	yes	999	no	close	yes	uuid:71d3285b-10e1-4faa-bc65-c7d2d765da49	pregnant					uuid:71d3285b-10e1-4faa-bc65-c7d2d765da49	na					uuid:71d3285b-10e1-4faa-bc65-c7d2d765da49	help_me					uuid:71d3285b-10e1-4faa-bc65-c7d2d765da49	unknown					uuid:71d3285b-10e1-4faa-bc65-c7d2d765da49
uuid:71dd54f9-aa73-4998-93a9-f3d056c3d007	yes	no	1	yes	yes	583	Dt		male	na	No	post	yes	post	999	28	Yes	18_29	yes	yes	999	no	close	yes	uuid:71dd54f9-aa73-4998-93a9-f3d056c3d007	dk					uuid:71dd54f9-aa73-4998-93a9-f3d056c3d007	na					uuid:71dd54f9-aa73-4998-93a9-f3d056c3d007	na_already_convinced					uuid:71dd54f9-aa73-4998-93a9-f3d056c3d007	unknown					uuid:71dd54f9-aa73-4998-93a9-f3d056c3d007
uuid:71f2b496-404a-4f1d-a468-c45c9d9036ae	na_not_aware_of_post	dk	3	yes	na	2801	Sl	Ggg	female	na	No	na	no	na	0	38	No	30_39	yes	na	999	na	na_not_aware_post	no	uuid:71f2b496-404a-4f1d-a468-c45c9d9036ae	dk					uuid:71f2b496-404a-4f1d-a468-c45c9d9036ae	na					uuid:71f2b496-404a-4f1d-a468-c45c9d9036ae	side_effect					uuid:71f2b496-404a-4f1d-a468-c45c9d9036ae	unknown					uuid:71f2b496-404a-4f1d-a468-c45c9d9036ae
uuid:71fc13a9-f72d-4e77-b3be-66c2d7a8059c	yes	dk	4	yes	yes	2736	pe	er	female	na	Primary	post	yes	post	3	34	Yes	30_39	yes	na	3	yes	close	yes	uuid:71fc13a9-f72d-4e77-b3be-66c2d7a8059c	pregnant					uuid:71fc13a9-f72d-4e77-b3be-66c2d7a8059c	action					uuid:71fc13a9-f72d-4e77-b3be-66c2d7a8059c	help_me					uuid:71fc13a9-f72d-4e77-b3be-66c2d7a8059c	clean_water					uuid:71fc13a9-f72d-4e77-b3be-66c2d7a8059c
uuid:72059c0e-62b2-4dc6-8617-e134a5e57884	dk	dk	5	yes	na	278	Vm		male	na	No	na	no	na	0	54	No	50_59	no	no	999	na	na_not_aware_post	no	uuid:72059c0e-62b2-4dc6-8617-e134a5e57884	dk					uuid:72059c0e-62b2-4dc6-8617-e134a5e57884	na					uuid:72059c0e-62b2-4dc6-8617-e134a5e57884	help_me					uuid:72059c0e-62b2-4dc6-8617-e134a5e57884	n/a					uuid:72059c0e-62b2-4dc6-8617-e134a5e57884
uuid:72bb67f5-7d96-4ec7-b5e1-a57e9924d923	yes	no	5	yes	yes	169	Sj		male	na	Some_secondary	post	yes	post	3	40	Yes	40_49	yes	yes	999	no	close	yes	uuid:72bb67f5-7d96-4ec7-b5e1-a57e9924d923	pregnant					uuid:72bb67f5-7d96-4ec7-b5e1-a57e9924d923	na					uuid:72bb67f5-7d96-4ec7-b5e1-a57e9924d923	help_family					uuid:72bb67f5-7d96-4ec7-b5e1-a57e9924d923	bednets					uuid:72bb67f5-7d96-4ec7-b5e1-a57e9924d923
uuid:730afb30-f124-4e52-a225-e1d69f6b2535	yes	no	2	yes	yes	86	mp		female	na	Primary	post	yes	post	3	27	Yes	18_29	yes	yes	999	no	close	yes	uuid:730afb30-f124-4e52-a225-e1d69f6b2535	pregnant					uuid:730afb30-f124-4e52-a225-e1d69f6b2535	na					uuid:730afb30-f124-4e52-a225-e1d69f6b2535	uk					uuid:730afb30-f124-4e52-a225-e1d69f6b2535	unknown					uuid:730afb30-f124-4e52-a225-e1d69f6b2535
uuid:733e03a1-c0f4-4be8-aea5-205fff7d84bf	yes	yes	2	yes	yes	92	sn		male	1	Primary	post	yes	post	3	18	Yes	18_29	yes	yes	999	yes	far	yes	uuid:733e03a1-c0f4-4be8-aea5-205fff7d84bf	pregnant					uuid:733e03a1-c0f4-4be8-aea5-205fff7d84bf	dk					uuid:733e03a1-c0f4-4be8-aea5-205fff7d84bf	uk					uuid:733e03a1-c0f4-4be8-aea5-205fff7d84bf	unknown					uuid:733e03a1-c0f4-4be8-aea5-205fff7d84bf
uuid:734ec00a-49b4-47a8-83ff-c061a352d4d5	no	no	2	yes	yes	315	gc		female	na	Primary	post	yes	post	2	20	Yes	18_29	yes	yes	999	no	far	yes	uuid:734ec00a-49b4-47a8-83ff-c061a352d4d5	pregnant					uuid:734ec00a-49b4-47a8-83ff-c061a352d4d5	na					uuid:734ec00a-49b4-47a8-83ff-c061a352d4d5	uk					uuid:734ec00a-49b4-47a8-83ff-c061a352d4d5	unknown					uuid:734ec00a-49b4-47a8-83ff-c061a352d4d5
uuid:734fb191-f588-42d0-98ca-373a136b6f4a	yes	no	1	yes	yes	38	Ob		female	na	Primary	post	yes	post	2	58	Yes	50_59	yes	yes	999	yes	not_too_far	yes	uuid:734fb191-f588-42d0-98ca-373a136b6f4a	Children_under_1					uuid:734fb191-f588-42d0-98ca-373a136b6f4a	dk					uuid:734fb191-f588-42d0-98ca-373a136b6f4a	na_already_convinced					uuid:734fb191-f588-42d0-98ca-373a136b6f4a	iftreat					uuid:734fb191-f588-42d0-98ca-373a136b6f4a
uuid:7350adf0-faf6-4cb1-81fa-08a92004acbc	yes	no	5	yes	yes	297	Ac		male	na	Primary	school	yes	school	3	19	No	18_29	yes	yes	999	no	not_too_far	yes	uuid:7350adf0-faf6-4cb1-81fa-08a92004acbc	Children_under_1					uuid:7350adf0-faf6-4cb1-81fa-08a92004acbc	na					uuid:7350adf0-faf6-4cb1-81fa-08a92004acbc	side_effect					uuid:7350adf0-faf6-4cb1-81fa-08a92004acbc	bednets					uuid:7350adf0-faf6-4cb1-81fa-08a92004acbc
uuid:73a64b10-3bda-4939-9f18-a94046064a6a	yes	no	2	yes	yes	261	zd		female	na	Finish_primary	post	yes	post	3	26	Yes	18_29	yes	yes	999	no	close	yes	uuid:73a64b10-3bda-4939-9f18-a94046064a6a	pregnant					uuid:73a64b10-3bda-4939-9f18-a94046064a6a	na					uuid:73a64b10-3bda-4939-9f18-a94046064a6a	uk					uuid:73a64b10-3bda-4939-9f18-a94046064a6a	clean_water					uuid:73a64b10-3bda-4939-9f18-a94046064a6a
uuid:73cb5549-40e9-40aa-a231-ad315e7b72ea	yes	no	1	yes	yes	290	Aj		female	na	Some_secondary	school	yes	school	2	18	Yes	18_29	yes	yes	999	yes	not_too_far	yes	uuid:73cb5549-40e9-40aa-a231-ad315e7b72ea	pregnant					uuid:73cb5549-40e9-40aa-a231-ad315e7b72ea	action					uuid:73cb5549-40e9-40aa-a231-ad315e7b72ea	na_already_convinced					uuid:73cb5549-40e9-40aa-a231-ad315e7b72ea	clean_water					uuid:73cb5549-40e9-40aa-a231-ad315e7b72ea
uuid:7443ea36-aa26-4126-a33c-951e3aa2594c	other	dk	3	yes	yes	159	rj	vfjf	female	dk	Finish_primary	other	no	other	2	48	Yes	40_49	yes	yes	999	no	far	yes	uuid:7443ea36-aa26-4126-a33c-951e3aa2594c	dk					uuid:7443ea36-aa26-4126-a33c-951e3aa2594c	na					uuid:7443ea36-aa26-4126-a33c-951e3aa2594c	help_me					uuid:7443ea36-aa26-4126-a33c-951e3aa2594c	other					uuid:7443ea36-aa26-4126-a33c-951e3aa2594c
uuid:7475c891-e3a0-4875-956a-41b70b142ede	yes	no	2	yes	yes	76	nr		female	na	Primary	post	yes	post	4	35	Yes	30_39	yes	yes	999	no	close	no	uuid:7475c891-e3a0-4875-956a-41b70b142ede	dk					uuid:7475c891-e3a0-4875-956a-41b70b142ede	na					uuid:7475c891-e3a0-4875-956a-41b70b142ede	uk					uuid:7475c891-e3a0-4875-956a-41b70b142ede	clean_water					uuid:7475c891-e3a0-4875-956a-41b70b142ede
uuid:74ff7e8a-bc30-47df-941a-03d73b5dbd41	yes	no	5	yes	yes	404	sd		female	na	Primary	post	yes	post	3	55	Yes	50_59	yes	yes	999	no	close	yes	uuid:74ff7e8a-bc30-47df-941a-03d73b5dbd41	pregnant					uuid:74ff7e8a-bc30-47df-941a-03d73b5dbd41	na					uuid:74ff7e8a-bc30-47df-941a-03d73b5dbd41	side_effect					uuid:74ff7e8a-bc30-47df-941a-03d73b5dbd41	clean_water					uuid:74ff7e8a-bc30-47df-941a-03d73b5dbd41
uuid:7534af16-df4e-4edc-b9bf-40c678a9101d	yes	no	1	yes	na	2620	jp		female	na	Some_secondary	na	yes	na	2	18	Yes	18_29	yes	na	999	na	not_too_far	no	uuid:7534af16-df4e-4edc-b9bf-40c678a9101d	pregnant					uuid:7534af16-df4e-4edc-b9bf-40c678a9101d	na					uuid:7534af16-df4e-4edc-b9bf-40c678a9101d	side_effect					uuid:7534af16-df4e-4edc-b9bf-40c678a9101d	clean_water					uuid:7534af16-df4e-4edc-b9bf-40c678a9101d
uuid:756d1e6f-4447-4de9-af7a-8eb4028132ed	yes	no	1	yes	yes	2802	pj		female	na	Some_secondary	post	no	post	0	24	No	18_29	yes	yes	5	no	not_too_far	yes	uuid:756d1e6f-4447-4de9-af7a-8eb4028132ed	pregnant					uuid:756d1e6f-4447-4de9-af7a-8eb4028132ed	na					uuid:756d1e6f-4447-4de9-af7a-8eb4028132ed	na_already_convinced					uuid:756d1e6f-4447-4de9-af7a-8eb4028132ed	unknown					uuid:756d1e6f-4447-4de9-af7a-8eb4028132ed
uuid:75a963e2-671f-4813-844e-773b8d16df89	yes	no	4	yes	yes	178	J d		female	na	No	post	yes	post	1	64	Yes	60_69	yes	yes	999	no	close	yes	uuid:75a963e2-671f-4813-844e-773b8d16df89	pregnant					uuid:75a963e2-671f-4813-844e-773b8d16df89	na					uuid:75a963e2-671f-4813-844e-773b8d16df89	help_me					uuid:75a963e2-671f-4813-844e-773b8d16df89	unknown					uuid:75a963e2-671f-4813-844e-773b8d16df89
uuid:75e65634-7962-40a9-b75c-a519634b5388	yes	no	1	yes	na	29	Tm		female	na	Some_secondary	na	no	na	999	25	Yes	18_29	yes	na	999	na	not_too_far	no	uuid:75e65634-7962-40a9-b75c-a519634b5388	pregnant					uuid:75e65634-7962-40a9-b75c-a519634b5388	na					uuid:75e65634-7962-40a9-b75c-a519634b5388	na_already_convinced					uuid:75e65634-7962-40a9-b75c-a519634b5388	unknown					uuid:75e65634-7962-40a9-b75c-a519634b5388
uuid:760b114b-9c95-41f4-95c6-ca44e7ceeaad	dk	no	2	yes	yes	151	lc		female	na	Primary	post	yes	post	2	29	Yes	18_29	yes	yes	999	yes	close	yes	uuid:760b114b-9c95-41f4-95c6-ca44e7ceeaad	pregnant					uuid:760b114b-9c95-41f4-95c6-ca44e7ceeaad	dk					uuid:760b114b-9c95-41f4-95c6-ca44e7ceeaad	na_already_convinced					uuid:760b114b-9c95-41f4-95c6-ca44e7ceeaad	unknown					uuid:760b114b-9c95-41f4-95c6-ca44e7ceeaad
uuid:760db8d5-020e-4c6e-8bd3-9312033d5554	yes	no	4	yes	yes	199	E a		female	na	University	school	yes	school	1	58	Yes	50_59	yes	yes	999	no	not_too_far	yes	uuid:760db8d5-020e-4c6e-8bd3-9312033d5554	pregnant					uuid:760db8d5-020e-4c6e-8bd3-9312033d5554	na					uuid:760db8d5-020e-4c6e-8bd3-9312033d5554	help_me					uuid:760db8d5-020e-4c6e-8bd3-9312033d5554	unknown					uuid:760db8d5-020e-4c6e-8bd3-9312033d5554
uuid:7637b3b1-66d6-4174-bee4-2b1139253095	yes	dk	4	yes	no	340	Mb	Er	male	na	No	post	yes	post	3	69	Yes	60_69	yes	yes	5	yes	not_too_far	yes	uuid:7637b3b1-66d6-4174-bee4-2b1139253095	pregnant					uuid:7637b3b1-66d6-4174-bee4-2b1139253095	dk					uuid:7637b3b1-66d6-4174-bee4-2b1139253095	help_me					uuid:7637b3b1-66d6-4174-bee4-2b1139253095	mosquito					uuid:7637b3b1-66d6-4174-bee4-2b1139253095
uuid:7649b8f6-a548-429c-a2fc-fe0a9d8e2b4c	yes	no	1	yes	yes	574	Mo		male	na	No	post	yes	post	999	58	Yes	50_59	yes	yes	999	no	not_too_far	yes	uuid:7649b8f6-a548-429c-a2fc-fe0a9d8e2b4c	pregnant					uuid:7649b8f6-a548-429c-a2fc-fe0a9d8e2b4c	na					uuid:7649b8f6-a548-429c-a2fc-fe0a9d8e2b4c	na_already_convinced					uuid:7649b8f6-a548-429c-a2fc-fe0a9d8e2b4c	clean_water					uuid:7649b8f6-a548-429c-a2fc-fe0a9d8e2b4c
uuid:766e8417-7603-4934-a521-ac2d9aac7cd8	na_not_aware_of_post	dk	5	yes	na	218	A j		female	na	Primary	na	no	na	999	26	No	18_29	no	na	999	na	na_not_aware_post	unknown	uuid:766e8417-7603-4934-a521-ac2d9aac7cd8	dk					uuid:766e8417-7603-4934-a521-ac2d9aac7cd8	na					uuid:766e8417-7603-4934-a521-ac2d9aac7cd8	help_me					uuid:766e8417-7603-4934-a521-ac2d9aac7cd8	n/a					uuid:766e8417-7603-4934-a521-ac2d9aac7cd8
uuid:7671b2a7-8e34-48c2-8edf-2ddfd23e0374	yes	no	5	yes	yes	1044	Fj		female	na	Some_secondary	home	yes	home	2	20	Yes	18_29	no	yes	999	yes	close	yes	uuid:7671b2a7-8e34-48c2-8edf-2ddfd23e0374	pregnant					uuid:7671b2a7-8e34-48c2-8edf-2ddfd23e0374	dk					uuid:7671b2a7-8e34-48c2-8edf-2ddfd23e0374	na_already_convinced					uuid:7671b2a7-8e34-48c2-8edf-2ddfd23e0374	n/a					uuid:7671b2a7-8e34-48c2-8edf-2ddfd23e0374
uuid:7672faed-3c68-4d81-8781-1ae69a035ace	yes	no	3	yes	yes	121	Ns	Vshd	male	1	Primary	post	yes	post	3	40	Yes	40_49	yes	yes	999	no	not_too_far	yes	uuid:7672faed-3c68-4d81-8781-1ae69a035ace	dk					uuid:7672faed-3c68-4d81-8781-1ae69a035ace	na					uuid:7672faed-3c68-4d81-8781-1ae69a035ace	help_family					uuid:7672faed-3c68-4d81-8781-1ae69a035ace	unknown					uuid:7672faed-3c68-4d81-8781-1ae69a035ace
uuid:76b71a05-9cab-4355-9886-cfdbeeb1c731	yes	no	2	yes	no	339	lm		female	na	Some_secondary	post	yes	post	3	28	Yes	18_29	yes	yes	5	yes	close	yes	uuid:76b71a05-9cab-4355-9886-cfdbeeb1c731	pregnant					uuid:76b71a05-9cab-4355-9886-cfdbeeb1c731	dk					uuid:76b71a05-9cab-4355-9886-cfdbeeb1c731	uk					uuid:76b71a05-9cab-4355-9886-cfdbeeb1c731	clean_water					uuid:76b71a05-9cab-4355-9886-cfdbeeb1c731
uuid:76db7d37-4474-4cdf-9813-7298d9734791	yes	no	5	yes	yes	254	Mc		female	na	Some_secondary	post	yes	post	3	44	Yes	40_49	yes	yes	999	no	close	yes	uuid:76db7d37-4474-4cdf-9813-7298d9734791	pregnant					uuid:76db7d37-4474-4cdf-9813-7298d9734791	na					uuid:76db7d37-4474-4cdf-9813-7298d9734791	help_me					uuid:76db7d37-4474-4cdf-9813-7298d9734791	bednets					uuid:76db7d37-4474-4cdf-9813-7298d9734791
uuid:76e6acbb-719e-4ce9-b01f-2bd42d913122	yes	no	2	yes	yes	61	jj		female	na	Primary	post	yes	post	3	25	Yes	18_29	yes	yes	999	yes	close	yes	uuid:76e6acbb-719e-4ce9-b01f-2bd42d913122	dk					uuid:76e6acbb-719e-4ce9-b01f-2bd42d913122	dk					uuid:76e6acbb-719e-4ce9-b01f-2bd42d913122	uk					uuid:76e6acbb-719e-4ce9-b01f-2bd42d913122	unknown					uuid:76e6acbb-719e-4ce9-b01f-2bd42d913122
uuid:76f5a563-36a1-4503-b694-f99084bbc47a	yes	no	2	no	yes	964	mr		female	na	Primary	post	yes	post	1	39	Yes	30_39	yes	yes	999	yes	not_too_far	yes	uuid:76f5a563-36a1-4503-b694-f99084bbc47a	pregnant					uuid:76f5a563-36a1-4503-b694-f99084bbc47a	not_eat					uuid:76f5a563-36a1-4503-b694-f99084bbc47a	na_already_convinced					uuid:76f5a563-36a1-4503-b694-f99084bbc47a	unknown					uuid:76f5a563-36a1-4503-b694-f99084bbc47a
uuid:77478705-6f95-49fd-a901-90a929768ed4	yes	no	1	yes	yes	590	vj		male	na	Primary	post	yes	post	2	57	Yes	50_59	yes	yes	999	no	close	yes	uuid:77478705-6f95-49fd-a901-90a929768ed4	pregnant					uuid:77478705-6f95-49fd-a901-90a929768ed4	na					uuid:77478705-6f95-49fd-a901-90a929768ed4	na_already_convinced					uuid:77478705-6f95-49fd-a901-90a929768ed4	mosquito					uuid:77478705-6f95-49fd-a901-90a929768ed4
uuid:776cf72a-26ba-4407-b0fc-368cd55f3eb2	dk	dk	2	yes	na	97	sm		female	na	No	na	dk	na	999	70	Yes	70_79	yes	na	999	na	dk	no	uuid:776cf72a-26ba-4407-b0fc-368cd55f3eb2	pregnant					uuid:776cf72a-26ba-4407-b0fc-368cd55f3eb2	na					uuid:776cf72a-26ba-4407-b0fc-368cd55f3eb2	uk					uuid:776cf72a-26ba-4407-b0fc-368cd55f3eb2	unknown					uuid:776cf72a-26ba-4407-b0fc-368cd55f3eb2
uuid:776cf868-e6cf-42f9-a65c-b8419386bcd4	yes	no	2	yes	yes	320	hp		male	na	No	post	yes	post	2	55	Yes	50_59	yes	yes	999	yes	not_too_far	yes	uuid:776cf868-e6cf-42f9-a65c-b8419386bcd4	pregnant					uuid:776cf868-e6cf-42f9-a65c-b8419386bcd4	action					uuid:776cf868-e6cf-42f9-a65c-b8419386bcd4	na_already_convinced					uuid:776cf868-e6cf-42f9-a65c-b8419386bcd4	n/a					uuid:776cf868-e6cf-42f9-a65c-b8419386bcd4
uuid:778eaea9-6015-4bd7-b283-e43614c753fc	yes	no	5	yes	yes	209	Mj	Gen yon fwa li te ansent	female	na	No	post	yes	post	2	23	Yes	18_29	yes	no	999	no	close	no	uuid:778eaea9-6015-4bd7-b283-e43614c753fc	pregnant					uuid:778eaea9-6015-4bd7-b283-e43614c753fc	na					uuid:778eaea9-6015-4bd7-b283-e43614c753fc	help_me					uuid:778eaea9-6015-4bd7-b283-e43614c753fc	n/a					uuid:778eaea9-6015-4bd7-b283-e43614c753fc
uuid:77ac81c0-4fe9-4dfc-b9aa-4a8a10a72e37	dk	dk	2	yes	na	2853	nt		female	na	Some_secondary	na	no	na	0	19	Yes	18_29	yes	na	999	na	dk	no	uuid:77ac81c0-4fe9-4dfc-b9aa-4a8a10a72e37	dk					uuid:77ac81c0-4fe9-4dfc-b9aa-4a8a10a72e37	na					uuid:77ac81c0-4fe9-4dfc-b9aa-4a8a10a72e37	uk					uuid:77ac81c0-4fe9-4dfc-b9aa-4a8a10a72e37	bednets					uuid:77ac81c0-4fe9-4dfc-b9aa-4a8a10a72e37
uuid:77ddd25d-a9cd-4a0a-9be3-97faba656f52	yes	no	2	yes	yes	2755	cs		male	na	Some_secondary	post	yes	post	1	19	Yes	18_29	yes	yes	1	yes	close	yes	uuid:77ddd25d-a9cd-4a0a-9be3-97faba656f52	pregnant					uuid:77ddd25d-a9cd-4a0a-9be3-97faba656f52	action					uuid:77ddd25d-a9cd-4a0a-9be3-97faba656f52	na_already_convinced					uuid:77ddd25d-a9cd-4a0a-9be3-97faba656f52	clean_water					uuid:77ddd25d-a9cd-4a0a-9be3-97faba656f52
uuid:7800635e-d79a-45ea-9d31-ec228b34250d	yes	no	2	yes	yes	2748	eg		female	na	Primary	post	yes	post	2	19	Yes	18_29	yes	yes	999	yes	close	yes	uuid:7800635e-d79a-45ea-9d31-ec228b34250d	dk					uuid:7800635e-d79a-45ea-9d31-ec228b34250d	na					uuid:7800635e-d79a-45ea-9d31-ec228b34250d	uk					uuid:7800635e-d79a-45ea-9d31-ec228b34250d	unknown					uuid:7800635e-d79a-45ea-9d31-ec228b34250d
uuid:78400e81-5059-4bd1-8a3f-73d08b66c4dd	yes	no	4	yes	yes	155	A d		female	na	Some_secondary	post	yes	post	3	38	Yes	30_39	yes	yes	999	no	close	yes	uuid:78400e81-5059-4bd1-8a3f-73d08b66c4dd	pregnant					uuid:78400e81-5059-4bd1-8a3f-73d08b66c4dd	na					uuid:78400e81-5059-4bd1-8a3f-73d08b66c4dd	help_family					uuid:78400e81-5059-4bd1-8a3f-73d08b66c4dd	clean_water					uuid:78400e81-5059-4bd1-8a3f-73d08b66c4dd
uuid:784d400e-7767-4487-ad9d-30d88dfbbae9	yes	no	1	yes	yes	2814	np		female	na	Primary	home	no	post	0	26	Yes	18_29	yes	yes	999	yes	close	yes	uuid:784d400e-7767-4487-ad9d-30d88dfbbae9	pregnant					uuid:784d400e-7767-4487-ad9d-30d88dfbbae9	action					uuid:784d400e-7767-4487-ad9d-30d88dfbbae9	na_already_convinced					uuid:784d400e-7767-4487-ad9d-30d88dfbbae9	clean_water					uuid:784d400e-7767-4487-ad9d-30d88dfbbae9
uuid:78b401bd-1adc-442c-a17f-10eb20f2ae99	yes	no	1	yes	yes	2651	Cs		female	na	Some_secondary	school	no	school	0	18	Yes	18_29	yes	yes	999	yes	na_not_aware_post	yes	uuid:78b401bd-1adc-442c-a17f-10eb20f2ae99	pregnant					uuid:78b401bd-1adc-442c-a17f-10eb20f2ae99	not_eat					uuid:78b401bd-1adc-442c-a17f-10eb20f2ae99	na_already_convinced					uuid:78b401bd-1adc-442c-a17f-10eb20f2ae99	iftreat					uuid:78b401bd-1adc-442c-a17f-10eb20f2ae99
uuid:78c28fed-1813-4fb6-b6c4-c772dee1b643	na_not_aware_of_post	no	1	yes	na	2654	Fr		female	na	No	home	yes	home	2	53	Yes	50_59	yes	yes	999	yes	na_not_aware_post	yes	uuid:78c28fed-1813-4fb6-b6c4-c772dee1b643	pregnant					uuid:78c28fed-1813-4fb6-b6c4-c772dee1b643	dk					uuid:78c28fed-1813-4fb6-b6c4-c772dee1b643	na_already_convinced					uuid:78c28fed-1813-4fb6-b6c4-c772dee1b643	unknown					uuid:78c28fed-1813-4fb6-b6c4-c772dee1b643
uuid:796b1b8d-7882-4a5a-b907-66ed272b38b5	dk	dk	4	yes	na	216	R p		female	na	Primary	na	yes	na	2	27	Yes	18_29	yes	na	999	na	dk	no	uuid:796b1b8d-7882-4a5a-b907-66ed272b38b5	pregnant					uuid:796b1b8d-7882-4a5a-b907-66ed272b38b5	na					uuid:796b1b8d-7882-4a5a-b907-66ed272b38b5	uk					uuid:796b1b8d-7882-4a5a-b907-66ed272b38b5	unknown					uuid:796b1b8d-7882-4a5a-b907-66ed272b38b5
uuid:797ed508-378f-407c-9ca3-1618c3a97737	yes	no	1	yes	yes	2652	Njb		female	na	Finish_primary	school	yes	school	2	18	Yes	18_29	yes	yes	999	yes	na_not_aware_post	yes	uuid:797ed508-378f-407c-9ca3-1618c3a97737	pregnant					uuid:797ed508-378f-407c-9ca3-1618c3a97737	action					uuid:797ed508-378f-407c-9ca3-1618c3a97737	na_already_convinced					uuid:797ed508-378f-407c-9ca3-1618c3a97737	mosquito					uuid:797ed508-378f-407c-9ca3-1618c3a97737
uuid:7980a8de-0d3d-4d6e-bcdc-30c1cbbe8f44	yes	no	5	yes	yes	2701	Ca	Ok	female	na	Some_secondary	post	no	post	1	26	Yes	18_29	yes	yes	1	no	close	yes	uuid:7980a8de-0d3d-4d6e-bcdc-30c1cbbe8f44	pregnant					uuid:7980a8de-0d3d-4d6e-bcdc-30c1cbbe8f44	na					uuid:7980a8de-0d3d-4d6e-bcdc-30c1cbbe8f44	other					uuid:7980a8de-0d3d-4d6e-bcdc-30c1cbbe8f44	clean_water					uuid:7980a8de-0d3d-4d6e-bcdc-30c1cbbe8f44
uuid:79811446-1e65-4e2a-a709-60a1377ca0d2	yes	no	5	yes	yes	298	As		female	na	No	home	yes	post	3	999	Yes	70_79	yes	yes	999	no	not_too_far	yes	uuid:79811446-1e65-4e2a-a709-60a1377ca0d2	Children_unk					uuid:79811446-1e65-4e2a-a709-60a1377ca0d2	na					uuid:79811446-1e65-4e2a-a709-60a1377ca0d2	help_me					uuid:79811446-1e65-4e2a-a709-60a1377ca0d2	clean_water					uuid:79811446-1e65-4e2a-a709-60a1377ca0d2
uuid:7994d35a-e29a-4247-a02a-a50269385376	dk	dk	4	yes	dk	216	H c	Se pitit li kite pram grenn nam pou li	female	na	No	home	yes	school	2	60	Yes	60_69	yes	yes	999	no	dk	yes	uuid:7994d35a-e29a-4247-a02a-a50269385376	pregnant					uuid:7994d35a-e29a-4247-a02a-a50269385376	na					uuid:7994d35a-e29a-4247-a02a-a50269385376	uk					uuid:7994d35a-e29a-4247-a02a-a50269385376	mosquito					uuid:7994d35a-e29a-4247-a02a-a50269385376
uuid:799be351-b2b2-486b-97ac-dec5a34e238a	yes	no	1	yes	na	2799	cb		female	na	No	na	no	na	0	20	Yes	18_29	yes	na	999	na	not_too_far	no	uuid:799be351-b2b2-486b-97ac-dec5a34e238a	pregnant					uuid:799be351-b2b2-486b-97ac-dec5a34e238a	na					uuid:799be351-b2b2-486b-97ac-dec5a34e238a	na_already_convinced					uuid:799be351-b2b2-486b-97ac-dec5a34e238a	iftreat					uuid:799be351-b2b2-486b-97ac-dec5a34e238a
uuid:79a2db6c-627f-45ea-bfc1-939b0c27e76d	yes	no	1	yes	yes	2798	jw		male	na	Some_secondary	post	yes	post	2	29	Yes	18_29	yes	yes	999	yes	not_too_far	yes	uuid:79a2db6c-627f-45ea-bfc1-939b0c27e76d	pregnant					uuid:79a2db6c-627f-45ea-bfc1-939b0c27e76d	action					uuid:79a2db6c-627f-45ea-bfc1-939b0c27e76d	na_already_convinced					uuid:79a2db6c-627f-45ea-bfc1-939b0c27e76d	iftreat					uuid:79a2db6c-627f-45ea-bfc1-939b0c27e76d
uuid:7a283881-f8f7-43b7-8bcc-0a259b5129ca	yes	no	5	yes	yes	1040	Mg		female	na	Finish_primary	post	yes	post	2	32	Yes	30_39	yes	yes	999	no	close	yes	uuid:7a283881-f8f7-43b7-8bcc-0a259b5129ca	pregnant					uuid:7a283881-f8f7-43b7-8bcc-0a259b5129ca	na					uuid:7a283881-f8f7-43b7-8bcc-0a259b5129ca	side_effect					uuid:7a283881-f8f7-43b7-8bcc-0a259b5129ca	clean_water					uuid:7a283881-f8f7-43b7-8bcc-0a259b5129ca
uuid:7a4afa19-ceb6-4840-9b96-5ff05486b9e9	yes	no	2	yes	yes	79	fg		female	na	Primary	post	yes	post	2	24	Yes	18_29	yes	yes	999	no	close	yes	uuid:7a4afa19-ceb6-4840-9b96-5ff05486b9e9	dk					uuid:7a4afa19-ceb6-4840-9b96-5ff05486b9e9	na					uuid:7a4afa19-ceb6-4840-9b96-5ff05486b9e9	uk					uuid:7a4afa19-ceb6-4840-9b96-5ff05486b9e9	bednets					uuid:7a4afa19-ceb6-4840-9b96-5ff05486b9e9
uuid:7a4fbe88-491a-4d99-9682-d07d3f25fb70	yes	no	1	yes	yes	2	Ya		female	na	No	post	yes	post	1	40	Yes	40_49	yes	yes	999	no	close	yes	uuid:7a4fbe88-491a-4d99-9682-d07d3f25fb70	pregnant					uuid:7a4fbe88-491a-4d99-9682-d07d3f25fb70	na					uuid:7a4fbe88-491a-4d99-9682-d07d3f25fb70	na_already_convinced					uuid:7a4fbe88-491a-4d99-9682-d07d3f25fb70	clean_water					uuid:7a4fbe88-491a-4d99-9682-d07d3f25fb70
uuid:7a50580b-7286-47a8-ba3d-a43aae6212d1	yes	no	5	yes	yes	1050	Ec		female	na	Primary	post	yes	post	2	42	Yes	40_49	yes	yes	999	no	close	yes	uuid:7a50580b-7286-47a8-ba3d-a43aae6212d1	pregnant					uuid:7a50580b-7286-47a8-ba3d-a43aae6212d1	na					uuid:7a50580b-7286-47a8-ba3d-a43aae6212d1	na_already_convinced					uuid:7a50580b-7286-47a8-ba3d-a43aae6212d1	bednets					uuid:7a50580b-7286-47a8-ba3d-a43aae6212d1
uuid:7a552b9f-5f99-403c-b929-32e949397a46	na_not_aware_of_post	no	4	yes	na	221	P l		male	na	No	na	no	na	999	32	No	30_39	yes	na	999	na	na_not_aware_post	no	uuid:7a552b9f-5f99-403c-b929-32e949397a46	dk					uuid:7a552b9f-5f99-403c-b929-32e949397a46	na					uuid:7a552b9f-5f99-403c-b929-32e949397a46	uk					uuid:7a552b9f-5f99-403c-b929-32e949397a46	unknown					uuid:7a552b9f-5f99-403c-b929-32e949397a46
uuid:7a641fac-1881-4145-b252-25b7dd6733ae	yes	no	5	yes	yes	417	Dm		female	na	Primary	post	yes	post	1	22	Yes	18_29	no	yes	999	no	close	yes	uuid:7a641fac-1881-4145-b252-25b7dd6733ae	dk					uuid:7a641fac-1881-4145-b252-25b7dd6733ae	na					uuid:7a641fac-1881-4145-b252-25b7dd6733ae	side_effect					uuid:7a641fac-1881-4145-b252-25b7dd6733ae	n/a					uuid:7a641fac-1881-4145-b252-25b7dd6733ae
uuid:7aa15684-b7d0-461b-a991-47817b5336b4	na_not_aware_of_post	dk	4	yes	yes	2734	jf	er	male	na	Some_secondary	post	yes	post	3	25	Yes	18_29	yes	yes	5	no	close	yes	uuid:7aa15684-b7d0-461b-a991-47817b5336b4	pregnant					uuid:7aa15684-b7d0-461b-a991-47817b5336b4	na					uuid:7aa15684-b7d0-461b-a991-47817b5336b4	help_me					uuid:7aa15684-b7d0-461b-a991-47817b5336b4	clean_water					uuid:7aa15684-b7d0-461b-a991-47817b5336b4
uuid:7acc856c-45a6-4a99-bfb4-afc9cb9f639f	yes	no	1	yes	yes	8	Rd		female	na	No	post	yes	post	1	46	Yes	40_49	yes	yes	999	yes	close	yes	uuid:7acc856c-45a6-4a99-bfb4-afc9cb9f639f	dk					uuid:7acc856c-45a6-4a99-bfb4-afc9cb9f639f	dk					uuid:7acc856c-45a6-4a99-bfb4-afc9cb9f639f	na_already_convinced					uuid:7acc856c-45a6-4a99-bfb4-afc9cb9f639f	iftreat					uuid:7acc856c-45a6-4a99-bfb4-afc9cb9f639f
uuid:7b10f0a9-e86f-4f26-a9c1-28a262de06f5	dk	dk	4	yes	dk	376	C.d	Fhv	female	na	No	home	yes	home	3	76	Yes	70_79	yes	yes	999	no	not_too_far	yes	uuid:7b10f0a9-e86f-4f26-a9c1-28a262de06f5	pregnant					uuid:7b10f0a9-e86f-4f26-a9c1-28a262de06f5	na					uuid:7b10f0a9-e86f-4f26-a9c1-28a262de06f5	uk					uuid:7b10f0a9-e86f-4f26-a9c1-28a262de06f5	unknown					uuid:7b10f0a9-e86f-4f26-a9c1-28a262de06f5
uuid:7b2f39a1-7df3-4dcb-a27c-fd16ed6bbfa5	yes	no	5	yes	yes	229	Fp		female	1	No	post	yes	post	2	25	Yes	18_29	yes	yes	999	yes	close	yes	uuid:7b2f39a1-7df3-4dcb-a27c-fd16ed6bbfa5	pregnant					uuid:7b2f39a1-7df3-4dcb-a27c-fd16ed6bbfa5	dk					uuid:7b2f39a1-7df3-4dcb-a27c-fd16ed6bbfa5	na_already_convinced					uuid:7b2f39a1-7df3-4dcb-a27c-fd16ed6bbfa5	clean_water					uuid:7b2f39a1-7df3-4dcb-a27c-fd16ed6bbfa5
uuid:7b33d001-d97b-4831-b8df-b816c0bf6493	yes	no	1	yes	yes	293	Rd		female	na	Some_secondary	home	yes	post	1	29	Yes	18_29	yes	yes	999	no	not_too_far	yes	uuid:7b33d001-d97b-4831-b8df-b816c0bf6493	pregnant					uuid:7b33d001-d97b-4831-b8df-b816c0bf6493	na					uuid:7b33d001-d97b-4831-b8df-b816c0bf6493	na_already_convinced					uuid:7b33d001-d97b-4831-b8df-b816c0bf6493	clean_water					uuid:7b33d001-d97b-4831-b8df-b816c0bf6493
uuid:7b3b61d9-ed43-4cd1-8e3b-fe4c8741977e	yes	no	3	yes	yes	524	Jr	Hyf	male	1	Some_secondary	post	no	school	2	22	Yes	18_29	yes	yes	999	yes	close	yes	uuid:7b3b61d9-ed43-4cd1-8e3b-fe4c8741977e	pregnant					uuid:7b3b61d9-ed43-4cd1-8e3b-fe4c8741977e	dk					uuid:7b3b61d9-ed43-4cd1-8e3b-fe4c8741977e	help_family					uuid:7b3b61d9-ed43-4cd1-8e3b-fe4c8741977e	clean_water					uuid:7b3b61d9-ed43-4cd1-8e3b-fe4c8741977e
uuid:7b3d6f92-d089-40a7-bf54-99590018572b	dk	dk	2	yes	na	896	mg		female	na	No	na	no	na	999	42	Yes	40_49	yes	na	999	na	dk	no	uuid:7b3d6f92-d089-40a7-bf54-99590018572b	dk					uuid:7b3d6f92-d089-40a7-bf54-99590018572b	dk					uuid:7b3d6f92-d089-40a7-bf54-99590018572b	uk					uuid:7b3d6f92-d089-40a7-bf54-99590018572b	unknown					uuid:7b3d6f92-d089-40a7-bf54-99590018572b
uuid:7b4a6e46-d9eb-47ba-91a7-d005f3ff0414	yes	no	1	yes	yes	50	Wg		female	na	Some_secondary	post	yes	post	2	20	Yes	18_29	yes	yes	999	no	not_too_far	yes	uuid:7b4a6e46-d9eb-47ba-91a7-d005f3ff0414	dk					uuid:7b4a6e46-d9eb-47ba-91a7-d005f3ff0414	na					uuid:7b4a6e46-d9eb-47ba-91a7-d005f3ff0414	na_already_convinced					uuid:7b4a6e46-d9eb-47ba-91a7-d005f3ff0414	clean_water					uuid:7b4a6e46-d9eb-47ba-91a7-d005f3ff0414
uuid:7c198940-f527-41c9-8b92-9b7eb088c5ec	yes	no	1	yes	yes	33	Bj	T	male	na	Primary	post	yes	post	3	50	Yes	50_59	yes	yes	999	no	close	yes	uuid:7c198940-f527-41c9-8b92-9b7eb088c5ec	pregnant					uuid:7c198940-f527-41c9-8b92-9b7eb088c5ec	na					uuid:7c198940-f527-41c9-8b92-9b7eb088c5ec	na_already_convinced					uuid:7c198940-f527-41c9-8b92-9b7eb088c5ec	clean_water					uuid:7c198940-f527-41c9-8b92-9b7eb088c5ec
uuid:7c1c70b1-fafe-42c8-9752-d7cec2747568	yes	no	2	dk	yes	2762	ps		male	na	No	post	yes	post	2	70	Yes	70_79	yes	yes	999	no	close	yes	uuid:7c1c70b1-fafe-42c8-9752-d7cec2747568	dk					uuid:7c1c70b1-fafe-42c8-9752-d7cec2747568	na					uuid:7c1c70b1-fafe-42c8-9752-d7cec2747568	uk					uuid:7c1c70b1-fafe-42c8-9752-d7cec2747568	unknown					uuid:7c1c70b1-fafe-42c8-9752-d7cec2747568
uuid:7c2059f4-98c4-4736-b350-d07a8b6269c4	yes	no	1	yes	na	2797	jsp		male	na	No	home	yes	home	2	58	Yes	50_59	yes	yes	999	no	close	yes	uuid:7c2059f4-98c4-4736-b350-d07a8b6269c4	dk					uuid:7c2059f4-98c4-4736-b350-d07a8b6269c4	na					uuid:7c2059f4-98c4-4736-b350-d07a8b6269c4	na_already_convinced					uuid:7c2059f4-98c4-4736-b350-d07a8b6269c4	unknown					uuid:7c2059f4-98c4-4736-b350-d07a8b6269c4
uuid:7c3c21df-10cc-45fa-8be4-ae1e37625b58	yes	no	5	yes	yes	429	Kj		female	na	Primary	post	yes	post	2	31	Yes	30_39	yes	yes	999	no	close	yes	uuid:7c3c21df-10cc-45fa-8be4-ae1e37625b58	pregnant					uuid:7c3c21df-10cc-45fa-8be4-ae1e37625b58	na					uuid:7c3c21df-10cc-45fa-8be4-ae1e37625b58	help_me					uuid:7c3c21df-10cc-45fa-8be4-ae1e37625b58	clean_water					uuid:7c3c21df-10cc-45fa-8be4-ae1e37625b58
uuid:7c448e9f-f218-4884-ae5c-0aa14546c56a	yes	no	4	yes	yes	2508	D.l	Ggg	male	na	Finish_primary	post	yes	post	3	27	Yes	18_29	yes	yes	999	yes	close	yes	uuid:7c448e9f-f218-4884-ae5c-0aa14546c56a	pregnant					uuid:7c448e9f-f218-4884-ae5c-0aa14546c56a	dk					uuid:7c448e9f-f218-4884-ae5c-0aa14546c56a	uk					uuid:7c448e9f-f218-4884-ae5c-0aa14546c56a	bednets					uuid:7c448e9f-f218-4884-ae5c-0aa14546c56a
uuid:7c884a4a-e3bc-4be7-8322-2ec196e5d073	yes	no	1	yes	yes	2621	Va		female	na	Primary	post	yes	post	2	44	Yes	40_49	yes	yes	5	yes	close	yes	uuid:7c884a4a-e3bc-4be7-8322-2ec196e5d073	pregnant					uuid:7c884a4a-e3bc-4be7-8322-2ec196e5d073	dk					uuid:7c884a4a-e3bc-4be7-8322-2ec196e5d073	na_already_convinced					uuid:7c884a4a-e3bc-4be7-8322-2ec196e5d073	bednets					uuid:7c884a4a-e3bc-4be7-8322-2ec196e5d073
uuid:7cec30cc-ee5d-4158-aec3-eeda2fb858d2	yes	no	5	yes	yes	1038	Nf		female	na	Some_secondary	post	yes	post	2	24	Yes	18_29	yes	yes	999	yes	close	yes	uuid:7cec30cc-ee5d-4158-aec3-eeda2fb858d2	pregnant					uuid:7cec30cc-ee5d-4158-aec3-eeda2fb858d2	dk					uuid:7cec30cc-ee5d-4158-aec3-eeda2fb858d2	na_already_convinced					uuid:7cec30cc-ee5d-4158-aec3-eeda2fb858d2	clean_water					uuid:7cec30cc-ee5d-4158-aec3-eeda2fb858d2
uuid:7cfae965-569a-4761-b24b-a9ede6aa2959	yes	no	1	dk	na	299	Mma		female	na	Primary	na	no	na	999	68	Yes	60_69	yes	na	999	na	not_too_far	no	uuid:7cfae965-569a-4761-b24b-a9ede6aa2959	dk					uuid:7cfae965-569a-4761-b24b-a9ede6aa2959	na					uuid:7cfae965-569a-4761-b24b-a9ede6aa2959	side_effect					uuid:7cfae965-569a-4761-b24b-a9ede6aa2959	unknown					uuid:7cfae965-569a-4761-b24b-a9ede6aa2959
uuid:7d035f1b-5ee6-4138-b894-2ec7e66adf7d	yes	no	5	yes	yes	2704	Ej	Ok	female	na	No	post	no	post	1	68	Yes	60_69	yes	yes	999	no	not_too_far	yes	uuid:7d035f1b-5ee6-4138-b894-2ec7e66adf7d	pregnant					uuid:7d035f1b-5ee6-4138-b894-2ec7e66adf7d	na					uuid:7d035f1b-5ee6-4138-b894-2ec7e66adf7d	uk					uuid:7d035f1b-5ee6-4138-b894-2ec7e66adf7d	clean_water					uuid:7d035f1b-5ee6-4138-b894-2ec7e66adf7d
uuid:7d6595a5-b3d6-4d8e-b7af-5138593772f9	na_not_aware_of_post	dk	4	yes	yes	2722	SP	Ok	female	na	Some_secondary	post	yes	home	2	25	Yes	18_29	yes	yes	5	yes	not_too_far	yes	uuid:7d6595a5-b3d6-4d8e-b7af-5138593772f9	pregnant					uuid:7d6595a5-b3d6-4d8e-b7af-5138593772f9	action					uuid:7d6595a5-b3d6-4d8e-b7af-5138593772f9	help_me					uuid:7d6595a5-b3d6-4d8e-b7af-5138593772f9	clean_water					uuid:7d6595a5-b3d6-4d8e-b7af-5138593772f9
uuid:7da009fb-c9c4-432d-b696-b12d2eb23f3b	other	dk	4	yes	na	676	Aj	Li pat bwe	male	na	Finish_secondary	na	yes	na	2	34	Yes	18_29	yes	na	5	na	dk	no	uuid:7da009fb-c9c4-432d-b696-b12d2eb23f3b	pregnant					uuid:7da009fb-c9c4-432d-b696-b12d2eb23f3b	na					uuid:7da009fb-c9c4-432d-b696-b12d2eb23f3b	help_family					uuid:7da009fb-c9c4-432d-b696-b12d2eb23f3b	clean_water					uuid:7da009fb-c9c4-432d-b696-b12d2eb23f3b
uuid:7db1877f-18c3-4dc0-a6a1-7196d22e2a4f	yes	no	2	yes	yes	51	aa		female	na	Primary	post	no	post	2	28	Yes	18_29	yes	yes	999	yes	close	yes	uuid:7db1877f-18c3-4dc0-a6a1-7196d22e2a4f	pregnant					uuid:7db1877f-18c3-4dc0-a6a1-7196d22e2a4f	dk					uuid:7db1877f-18c3-4dc0-a6a1-7196d22e2a4f	uk					uuid:7db1877f-18c3-4dc0-a6a1-7196d22e2a4f	unknown					uuid:7db1877f-18c3-4dc0-a6a1-7196d22e2a4f
uuid:7dba887d-bd16-4d37-86f1-e8420eb58dbd	yes	no	5	yes	yes	2572	Le	Li pap ok	female	1	Primary	post	yes	post	2	21	Yes	18_29	yes	yes	999	yes	not_too_far	yes	uuid:7dba887d-bd16-4d37-86f1-e8420eb58dbd	pregnant					uuid:7dba887d-bd16-4d37-86f1-e8420eb58dbd	action					uuid:7dba887d-bd16-4d37-86f1-e8420eb58dbd	help_me					uuid:7dba887d-bd16-4d37-86f1-e8420eb58dbd	clean_water					uuid:7dba887d-bd16-4d37-86f1-e8420eb58dbd
uuid:7ddec165-8038-437f-a317-86f448286438	yes	no	2	yes	yes	452	ic		male	na	Primary	post	yes	post	1	34	Yes	30_39	yes	yes	999	yes	close	yes	uuid:7ddec165-8038-437f-a317-86f448286438	pregnant					uuid:7ddec165-8038-437f-a317-86f448286438	dk					uuid:7ddec165-8038-437f-a317-86f448286438	na_already_convinced					uuid:7ddec165-8038-437f-a317-86f448286438	clean_water					uuid:7ddec165-8038-437f-a317-86f448286438
uuid:7dec03a0-e19c-4fa0-9e96-647dac7fa53b	yes	no	3	yes	yes	500	jf	cdfd	male	1	Some_secondary	school	yes	school	3	19	Yes	18_29	yes	yes	999	no	not_too_far	yes	uuid:7dec03a0-e19c-4fa0-9e96-647dac7fa53b	pregnant					uuid:7dec03a0-e19c-4fa0-9e96-647dac7fa53b	na					uuid:7dec03a0-e19c-4fa0-9e96-647dac7fa53b	help_me					uuid:7dec03a0-e19c-4fa0-9e96-647dac7fa53b	clean_water					uuid:7dec03a0-e19c-4fa0-9e96-647dac7fa53b
uuid:7e2fe301-124d-4127-9810-c2653cbeaeaf	yes	no	1	yes	yes	594	gj		female	na	No	post	yes	post	2	50	Yes	50_59	yes	yes	999	no	not_too_far	yes	uuid:7e2fe301-124d-4127-9810-c2653cbeaeaf	pregnant					uuid:7e2fe301-124d-4127-9810-c2653cbeaeaf	na					uuid:7e2fe301-124d-4127-9810-c2653cbeaeaf	na_already_convinced					uuid:7e2fe301-124d-4127-9810-c2653cbeaeaf	iftreat					uuid:7e2fe301-124d-4127-9810-c2653cbeaeaf
uuid:7e35a98d-5b0c-489f-9626-2a09b2bc301a	dk	dk	3	dk	dk	147	Cd	Vdv	female	dk	Finish_primary	home	yes	home	3	19	No	18_29	yes	yes	999	no	dk	yes	uuid:7e35a98d-5b0c-489f-9626-2a09b2bc301a	pregnant					uuid:7e35a98d-5b0c-489f-9626-2a09b2bc301a	na					uuid:7e35a98d-5b0c-489f-9626-2a09b2bc301a	side_effect					uuid:7e35a98d-5b0c-489f-9626-2a09b2bc301a	other					uuid:7e35a98d-5b0c-489f-9626-2a09b2bc301a
uuid:7e3680fa-125e-4611-83c5-12394dcfc34d	yes	no	4	yes	yes	153	L c		male	na	No	post	yes	post	999	58	Yes	50_59	yes	yes	99	yes	close	yes	uuid:7e3680fa-125e-4611-83c5-12394dcfc34d	pregnant					uuid:7e3680fa-125e-4611-83c5-12394dcfc34d	dk					uuid:7e3680fa-125e-4611-83c5-12394dcfc34d	help_me					uuid:7e3680fa-125e-4611-83c5-12394dcfc34d	unknown					uuid:7e3680fa-125e-4611-83c5-12394dcfc34d
uuid:7e44500c-24fd-40c6-bdf7-b0c6245a6691	na_not_aware_of_post	dk	4	no	na	365	Sm	Oo	female	na	Primary	na	no	post	0	40	No	40_49	no	no	999	na	na_not_aware_post	no	uuid:7e44500c-24fd-40c6-bdf7-b0c6245a6691	pregnant					uuid:7e44500c-24fd-40c6-bdf7-b0c6245a6691	na					uuid:7e44500c-24fd-40c6-bdf7-b0c6245a6691	help_me					uuid:7e44500c-24fd-40c6-bdf7-b0c6245a6691	n/a					uuid:7e44500c-24fd-40c6-bdf7-b0c6245a6691
uuid:7e8d2eb8-c1bf-4538-8003-13869084eb49	yes	no	5	yes	yes	1012	Js		male	na	Finish_secondary	post	yes	post	2	23	Yes	18_29	no	yes	999	no	close	yes	uuid:7e8d2eb8-c1bf-4538-8003-13869084eb49	pregnant					uuid:7e8d2eb8-c1bf-4538-8003-13869084eb49	na					uuid:7e8d2eb8-c1bf-4538-8003-13869084eb49	na_already_convinced					uuid:7e8d2eb8-c1bf-4538-8003-13869084eb49	n/a					uuid:7e8d2eb8-c1bf-4538-8003-13869084eb49
uuid:7e965dc9-e65d-4f53-9653-6911ecbb1ca9	yes	no	3	yes	yes	110	Jc	Geug	female	1	Primary	post	yes	post	3	35	Yes	30_39	yes	yes	999	no	not_too_far	yes	uuid:7e965dc9-e65d-4f53-9653-6911ecbb1ca9	Children_under_1					uuid:7e965dc9-e65d-4f53-9653-6911ecbb1ca9	na					uuid:7e965dc9-e65d-4f53-9653-6911ecbb1ca9	help_me					uuid:7e965dc9-e65d-4f53-9653-6911ecbb1ca9	unknown					uuid:7e965dc9-e65d-4f53-9653-6911ecbb1ca9
uuid:7f02e7f1-156f-4e2f-a355-e657ab99d22e	dk	dk	4	yes	na	152	A j		female	na	Primary	na	no	na	999	30	Yes	30_39	yes	na	999	na	dk	no	uuid:7f02e7f1-156f-4e2f-a355-e657ab99d22e	pregnant					uuid:7f02e7f1-156f-4e2f-a355-e657ab99d22e	na					uuid:7f02e7f1-156f-4e2f-a355-e657ab99d22e	help_me					uuid:7f02e7f1-156f-4e2f-a355-e657ab99d22e	unknown					uuid:7f02e7f1-156f-4e2f-a355-e657ab99d22e
uuid:7f240ae5-a414-41a4-a00f-65dd0df3a73c	yes	no	5	yes	yes	407	Mp		female	na	Finish_primary	post	yes	post	2	22	Yes	18_29	yes	yes	999	no	not_too_far	yes	uuid:7f240ae5-a414-41a4-a00f-65dd0df3a73c	pregnant					uuid:7f240ae5-a414-41a4-a00f-65dd0df3a73c	na					uuid:7f240ae5-a414-41a4-a00f-65dd0df3a73c	na_already_convinced					uuid:7f240ae5-a414-41a4-a00f-65dd0df3a73c	clean_water					uuid:7f240ae5-a414-41a4-a00f-65dd0df3a73c
uuid:7f265458-514b-4d3e-b519-6025d3423df3	yes	dk	4	yes	yes	357	Lr	Ok	male	na	Primary	post	yes	post	2	42	Yes	40_49	yes	yes	999	yes	close	yes	uuid:7f265458-514b-4d3e-b519-6025d3423df3	pregnant					uuid:7f265458-514b-4d3e-b519-6025d3423df3	not_eat					uuid:7f265458-514b-4d3e-b519-6025d3423df3	help_me					uuid:7f265458-514b-4d3e-b519-6025d3423df3	bednets					uuid:7f265458-514b-4d3e-b519-6025d3423df3
uuid:7f29eb25-863d-4d6c-8a96-182ab23a6893	yes	no	1	yes	na	2674	pd		male	na	Finish_primary	home	yes	home	2	38	Yes	30_39	yes	yes	999	no	close	yes	uuid:7f29eb25-863d-4d6c-8a96-182ab23a6893	pregnant					uuid:7f29eb25-863d-4d6c-8a96-182ab23a6893	na					uuid:7f29eb25-863d-4d6c-8a96-182ab23a6893	na_already_convinced					uuid:7f29eb25-863d-4d6c-8a96-182ab23a6893	mosquito					uuid:7f29eb25-863d-4d6c-8a96-182ab23a6893
uuid:7f2fb018-d752-4a8e-818f-48d2112194bf	yes	no	1	yes	na	262	Cs		female	na	Some_secondary	home	yes	post	2	41	Yes	40_49	yes	yes	999	yes	other	yes	uuid:7f2fb018-d752-4a8e-818f-48d2112194bf	pregnant					uuid:7f2fb018-d752-4a8e-818f-48d2112194bf	action					uuid:7f2fb018-d752-4a8e-818f-48d2112194bf	na_already_convinced					uuid:7f2fb018-d752-4a8e-818f-48d2112194bf	bednets					uuid:7f2fb018-d752-4a8e-818f-48d2112194bf
uuid:7f4e7c5a-c27d-498e-a86e-c6cf49f868db	yes	no	1	yes	yes	2806	bl		female	na	Some_secondary	post	yes	post	1	47	Yes	40_49	yes	yes	999	no	close	yes	uuid:7f4e7c5a-c27d-498e-a86e-c6cf49f868db	pregnant					uuid:7f4e7c5a-c27d-498e-a86e-c6cf49f868db	na					uuid:7f4e7c5a-c27d-498e-a86e-c6cf49f868db	na_already_convinced					uuid:7f4e7c5a-c27d-498e-a86e-c6cf49f868db	iftreat					uuid:7f4e7c5a-c27d-498e-a86e-c6cf49f868db
uuid:7f7ee575-844c-4940-8de3-56a018683bda	yes	no	4	yes	yes	374	Sj	Ggy	female	na	No	post	yes	post	3	25	Yes	18_29	yes	yes	999	no	not_too_far	yes	uuid:7f7ee575-844c-4940-8de3-56a018683bda	pregnant					uuid:7f7ee575-844c-4940-8de3-56a018683bda	na					uuid:7f7ee575-844c-4940-8de3-56a018683bda	uk					uuid:7f7ee575-844c-4940-8de3-56a018683bda	bednets					uuid:7f7ee575-844c-4940-8de3-56a018683bda
uuid:7f814e3e-2361-427c-b1fe-fece6342c756	no	dk	4	yes	na	189	V c		male	na	University	na	yes	na	2	34	Yes	30_39	yes	na	999	na	dk	no	uuid:7f814e3e-2361-427c-b1fe-fece6342c756	pregnant					uuid:7f814e3e-2361-427c-b1fe-fece6342c756	na					uuid:7f814e3e-2361-427c-b1fe-fece6342c756	help_me					uuid:7f814e3e-2361-427c-b1fe-fece6342c756	iftreat					uuid:7f814e3e-2361-427c-b1fe-fece6342c756
uuid:7f84f1c7-b472-41b9-97a2-1a32bd298afb	yes	no	5	yes	yes	248	Rm		female	na	No	post	yes	post	3	45	Yes	40_49	yes	yes	999	no	close	yes	uuid:7f84f1c7-b472-41b9-97a2-1a32bd298afb	pregnant					uuid:7f84f1c7-b472-41b9-97a2-1a32bd298afb	na					uuid:7f84f1c7-b472-41b9-97a2-1a32bd298afb	help_me					uuid:7f84f1c7-b472-41b9-97a2-1a32bd298afb	bednets					uuid:7f84f1c7-b472-41b9-97a2-1a32bd298afb
uuid:7f93b166-29ea-4ba3-bdcb-f5469d9dc310	dk	dk	2	yes	na	2855	cd		female	na	Some_secondary	na	no	na	0	21	Yes	18_29	yes	na	999	na	dk	no	uuid:7f93b166-29ea-4ba3-bdcb-f5469d9dc310	pregnant					uuid:7f93b166-29ea-4ba3-bdcb-f5469d9dc310	na					uuid:7f93b166-29ea-4ba3-bdcb-f5469d9dc310	uk					uuid:7f93b166-29ea-4ba3-bdcb-f5469d9dc310	bednets					uuid:7f93b166-29ea-4ba3-bdcb-f5469d9dc310
uuid:7f96598b-052a-4bd0-aec0-d60714e8869d	yes	no	3	yes	yes	725	Em	Vfv	female	1	No	post	yes	post	3	49	Yes	40_49	no	yes	999	no	close	yes	uuid:7f96598b-052a-4bd0-aec0-d60714e8869d	dk					uuid:7f96598b-052a-4bd0-aec0-d60714e8869d	na					uuid:7f96598b-052a-4bd0-aec0-d60714e8869d	help_me					uuid:7f96598b-052a-4bd0-aec0-d60714e8869d	n/a					uuid:7f96598b-052a-4bd0-aec0-d60714e8869d
uuid:7fbdb513-2e26-4b9e-bff7-2857409ca307	yes	no	2	yes	yes	2747	ll		male	na	No	post	yes	post	3	60	Yes	60_69	yes	yes	999	no	close	yes	uuid:7fbdb513-2e26-4b9e-bff7-2857409ca307	pregnant					uuid:7fbdb513-2e26-4b9e-bff7-2857409ca307	na					uuid:7fbdb513-2e26-4b9e-bff7-2857409ca307	na_already_convinced					uuid:7fbdb513-2e26-4b9e-bff7-2857409ca307	clean_water					uuid:7fbdb513-2e26-4b9e-bff7-2857409ca307
uuid:7fc26c03-7145-4375-9aa2-0fdb46dd40ae	yes	no	4	yes	yes	175	L e		female	na	No	post	no	post	999	75	Yes	70_79	yes	yes	999	no	close	yes	uuid:7fc26c03-7145-4375-9aa2-0fdb46dd40ae	pregnant					uuid:7fc26c03-7145-4375-9aa2-0fdb46dd40ae	na					uuid:7fc26c03-7145-4375-9aa2-0fdb46dd40ae	uk					uuid:7fc26c03-7145-4375-9aa2-0fdb46dd40ae	bednets					uuid:7fc26c03-7145-4375-9aa2-0fdb46dd40ae
uuid:7fc8e0bd-0984-43e6-ac21-3d3f2c81fa0e	yes	no	5	yes	yes	2688	Ma		male	na	Primary	home	yes	home	3	24	Yes	18_29	no	yes	999	no	not_too_far	yes	uuid:7fc8e0bd-0984-43e6-ac21-3d3f2c81fa0e	dk					uuid:7fc8e0bd-0984-43e6-ac21-3d3f2c81fa0e	na					uuid:7fc8e0bd-0984-43e6-ac21-3d3f2c81fa0e	help_me					uuid:7fc8e0bd-0984-43e6-ac21-3d3f2c81fa0e	n/a					uuid:7fc8e0bd-0984-43e6-ac21-3d3f2c81fa0e
uuid:7fcd93e2-16eb-430c-b9e0-fb3e2c111080	yes	no	1	yes	yes	2673	sv		female	na	Some_secondary	post	yes	post	2	29	Yes	18_29	yes	yes	999	no	not_too_far	yes	uuid:7fcd93e2-16eb-430c-b9e0-fb3e2c111080	pregnant					uuid:7fcd93e2-16eb-430c-b9e0-fb3e2c111080	na					uuid:7fcd93e2-16eb-430c-b9e0-fb3e2c111080	na_already_convinced					uuid:7fcd93e2-16eb-430c-b9e0-fb3e2c111080	clean_water					uuid:7fcd93e2-16eb-430c-b9e0-fb3e2c111080
uuid:7fefa348-3f21-4bbc-a686-c1e92939ccfc	yes	no	1	yes	yes	2	Dd	Y	female	na	No	post	no	post	1	50	No	50_59	yes	yes	999	no	not_too_far	yes	uuid:7fefa348-3f21-4bbc-a686-c1e92939ccfc	other					uuid:7fefa348-3f21-4bbc-a686-c1e92939ccfc	other					uuid:7fefa348-3f21-4bbc-a686-c1e92939ccfc	other					uuid:7fefa348-3f21-4bbc-a686-c1e92939ccfc	clean_water					uuid:7fefa348-3f21-4bbc-a686-c1e92939ccfc
uuid:800a7676-d8b5-40cf-88d4-b008ee67a292	yes	no	1	yes	na	2622	tj		male	na	Primary	home	yes	home	1	60	Yes	60_69	yes	yes	999	yes	not_too_far	yes	uuid:800a7676-d8b5-40cf-88d4-b008ee67a292	pregnant					uuid:800a7676-d8b5-40cf-88d4-b008ee67a292	action					uuid:800a7676-d8b5-40cf-88d4-b008ee67a292	na_already_convinced					uuid:800a7676-d8b5-40cf-88d4-b008ee67a292	clean_water					uuid:800a7676-d8b5-40cf-88d4-b008ee67a292
uuid:801147b0-0021-4a3b-a55f-48344c1e6a31	yes	no	5	yes	yes	2689	Jm		male	na	Primary	post	yes	post	2	55	Yes	50_59	yes	yes	999	no	close	yes	uuid:801147b0-0021-4a3b-a55f-48344c1e6a31	pregnant					uuid:801147b0-0021-4a3b-a55f-48344c1e6a31	na					uuid:801147b0-0021-4a3b-a55f-48344c1e6a31	help_me					uuid:801147b0-0021-4a3b-a55f-48344c1e6a31	bednets					uuid:801147b0-0021-4a3b-a55f-48344c1e6a31
uuid:8013cd43-31d4-4c6a-9136-615a10a85817	yes	dk	3	yes	yes	146	df	madanm li ki te potel pou li.	male	dk	Finish_primary	home	no	home	1	47	Yes	40_49	yes	yes	999	no	not_too_far	yes	uuid:8013cd43-31d4-4c6a-9136-615a10a85817	pregnant					uuid:8013cd43-31d4-4c6a-9136-615a10a85817	na					uuid:8013cd43-31d4-4c6a-9136-615a10a85817	help_family					uuid:8013cd43-31d4-4c6a-9136-615a10a85817	clean_water					uuid:8013cd43-31d4-4c6a-9136-615a10a85817
uuid:8015b457-4edf-462b-8e38-6c55acfe3138	yes	no	5	yes	yes	1016	Nf		female	na	No	post	yes	post	2	32	Yes	30_39	no	yes	999	no	close	yes	uuid:8015b457-4edf-462b-8e38-6c55acfe3138	pregnant					uuid:8015b457-4edf-462b-8e38-6c55acfe3138	na					uuid:8015b457-4edf-462b-8e38-6c55acfe3138	side_effect					uuid:8015b457-4edf-462b-8e38-6c55acfe3138	n/a					uuid:8015b457-4edf-462b-8e38-6c55acfe3138
uuid:80371368-f7ea-457a-a02a-b102bdbfb315	yes	dk	4	yes	yes	2723	Mf	Ok	female	na	No	post	yes	post	2	26	Yes	18_29	yes	yes	5	yes	close	yes	uuid:80371368-f7ea-457a-a02a-b102bdbfb315	pregnant					uuid:80371368-f7ea-457a-a02a-b102bdbfb315	action					uuid:80371368-f7ea-457a-a02a-b102bdbfb315	help_me					uuid:80371368-f7ea-457a-a02a-b102bdbfb315	clean_water					uuid:80371368-f7ea-457a-a02a-b102bdbfb315
uuid:8068d9ab-556e-4122-bcb8-1c1cc096a26a	yes	no	3	yes	yes	2795	Jk	Hrg	male	1	Finish_primary	school	yes	school	3	19	Yes	18_29	yes	yes	999	no	not_too_far	yes	uuid:8068d9ab-556e-4122-bcb8-1c1cc096a26a	pregnant					uuid:8068d9ab-556e-4122-bcb8-1c1cc096a26a	na					uuid:8068d9ab-556e-4122-bcb8-1c1cc096a26a	help_me					uuid:8068d9ab-556e-4122-bcb8-1c1cc096a26a	unknown					uuid:8068d9ab-556e-4122-bcb8-1c1cc096a26a
uuid:806f93e3-4bb8-4a7c-b627-9eaf1ddbdeee	yes	no	5	yes	yes	2713	Rb		male	na	Primary	post	yes	post	3	32	Yes	30_39	yes	yes	999	no	close	yes	uuid:806f93e3-4bb8-4a7c-b627-9eaf1ddbdeee	pregnant					uuid:806f93e3-4bb8-4a7c-b627-9eaf1ddbdeee	na					uuid:806f93e3-4bb8-4a7c-b627-9eaf1ddbdeee	na_already_convinced					uuid:806f93e3-4bb8-4a7c-b627-9eaf1ddbdeee	bednets					uuid:806f93e3-4bb8-4a7c-b627-9eaf1ddbdeee
uuid:807178af-d6e4-4787-b957-a44a45f89a79	yes	no	1	yes	yes	272	Mj		male	na	No	post	yes	post	1	57	Yes	50_59	yes	yes	999	no	close	yes	uuid:807178af-d6e4-4787-b957-a44a45f89a79	dk					uuid:807178af-d6e4-4787-b957-a44a45f89a79	na					uuid:807178af-d6e4-4787-b957-a44a45f89a79	na_already_convinced					uuid:807178af-d6e4-4787-b957-a44a45f89a79	iftreat					uuid:807178af-d6e4-4787-b957-a44a45f89a79
uuid:809e7a38-6ba3-4aa5-974e-86819829566a	na_not_aware_of_post	dk	5	dk	na	2719	Wr	Li pa vle reponn	female	na	Some_secondary	na	dk	na	999	24	DK	18_29	no	na	999	dk	na_not_aware_post	unknown	uuid:809e7a38-6ba3-4aa5-974e-86819829566a	dk					uuid:809e7a38-6ba3-4aa5-974e-86819829566a	na					uuid:809e7a38-6ba3-4aa5-974e-86819829566a	uk					uuid:809e7a38-6ba3-4aa5-974e-86819829566a	unknown					uuid:809e7a38-6ba3-4aa5-974e-86819829566a
uuid:80cc7b8b-5ee4-4122-b9a5-f972f146d8a6	yes	no	2	yes	dk	2765	pm		female	na	No	home	yes	home	3	74	Yes	70_79	yes	yes	999	no	close	yes	uuid:80cc7b8b-5ee4-4122-b9a5-f972f146d8a6	dk					uuid:80cc7b8b-5ee4-4122-b9a5-f972f146d8a6	na					uuid:80cc7b8b-5ee4-4122-b9a5-f972f146d8a6	na_already_convinced					uuid:80cc7b8b-5ee4-4122-b9a5-f972f146d8a6	unknown					uuid:80cc7b8b-5ee4-4122-b9a5-f972f146d8a6
uuid:810259af-9fa6-4dd8-9328-df78208535db	yes	no	2	yes	yes	310	mc		female	na	Some_secondary	post	yes	post	2	43	Yes	40_49	yes	yes	999	no	close	yes	uuid:810259af-9fa6-4dd8-9328-df78208535db	dk					uuid:810259af-9fa6-4dd8-9328-df78208535db	na					uuid:810259af-9fa6-4dd8-9328-df78208535db	na_already_convinced					uuid:810259af-9fa6-4dd8-9328-df78208535db	bednets					uuid:810259af-9fa6-4dd8-9328-df78208535db
uuid:8154351e-868d-4b02-be78-22079c03881e	na_not_aware_of_post	dk	4	yes	na	168	S z	Li pat jwwenn konprime a	female	na	Primary	na	no	na	999	24	No	18_29	no	na	999	na	na_not_aware_post	no	uuid:8154351e-868d-4b02-be78-22079c03881e	dk					uuid:8154351e-868d-4b02-be78-22079c03881e	na					uuid:8154351e-868d-4b02-be78-22079c03881e	help_me					uuid:8154351e-868d-4b02-be78-22079c03881e	n/a					uuid:8154351e-868d-4b02-be78-22079c03881e
uuid:8194e134-5a9b-49b3-9c12-482df099bd79	yes	no	2	yes	yes	2795	Sm		male	na	Primary	school	yes	school	3	18	Yes	18_29	yes	yes	999	no	other	yes	uuid:8194e134-5a9b-49b3-9c12-482df099bd79	pregnant					uuid:8194e134-5a9b-49b3-9c12-482df099bd79	na					uuid:8194e134-5a9b-49b3-9c12-482df099bd79	side_effect					uuid:8194e134-5a9b-49b3-9c12-482df099bd79	iftreat					uuid:8194e134-5a9b-49b3-9c12-482df099bd79
uuid:820ee971-aa56-4324-8971-da509b1ae7c6	yes	no	2	yes	yes	548	fp		female	na	Primary	post	yes	post	2	60	Yes	60_69	yes	yes	999	yes	close	yes	uuid:820ee971-aa56-4324-8971-da509b1ae7c6	pregnant					uuid:820ee971-aa56-4324-8971-da509b1ae7c6	dk					uuid:820ee971-aa56-4324-8971-da509b1ae7c6	na_already_convinced					uuid:820ee971-aa56-4324-8971-da509b1ae7c6	unknown					uuid:820ee971-aa56-4324-8971-da509b1ae7c6
uuid:82129a94-d803-4189-bd01-aa569f1a3362	yes	dk	4	yes	na	373	O.a	Ygd	male	na	No	home	yes	post	3	63	Yes	60_69	yes	yes	999	yes	far	yes	uuid:82129a94-d803-4189-bd01-aa569f1a3362	pregnant					uuid:82129a94-d803-4189-bd01-aa569f1a3362	na					uuid:82129a94-d803-4189-bd01-aa569f1a3362	other					uuid:82129a94-d803-4189-bd01-aa569f1a3362	bednets					uuid:82129a94-d803-4189-bd01-aa569f1a3362
uuid:823fc182-f53b-4174-a2cc-d98f337e84cd	yes	yes	1	yes	yes	2818	Cv		female	dk	Some_secondary	post	yes	post	1	19	Yes	18_29	yes	yes	999	yes	close	yes	uuid:823fc182-f53b-4174-a2cc-d98f337e84cd	pregnant					uuid:823fc182-f53b-4174-a2cc-d98f337e84cd	worm					uuid:823fc182-f53b-4174-a2cc-d98f337e84cd	na_already_convinced					uuid:823fc182-f53b-4174-a2cc-d98f337e84cd	clean_water					uuid:823fc182-f53b-4174-a2cc-d98f337e84cd
uuid:824dac84-2138-4201-a0de-8e0eb8063aaf	yes	no	4	yes	yes	2522	H.c	Gfr	male	1	Finish_primary	post	yes	post	3	30	Yes	30_39	yes	yes	999	no	close	yes	uuid:824dac84-2138-4201-a0de-8e0eb8063aaf	pregnant					uuid:824dac84-2138-4201-a0de-8e0eb8063aaf	na					uuid:824dac84-2138-4201-a0de-8e0eb8063aaf	na_already_convinced					uuid:824dac84-2138-4201-a0de-8e0eb8063aaf	clean_water					uuid:824dac84-2138-4201-a0de-8e0eb8063aaf
uuid:824f5d54-5a9c-4d4f-9b6c-799e25efb3fb	yes	no	3	yes	yes	116	As	Vsd	male	1	No	post	yes	post	3	52	Yes	50_59	no	yes	999	no	not_too_far	yes	uuid:824f5d54-5a9c-4d4f-9b6c-799e25efb3fb	pregnant					uuid:824f5d54-5a9c-4d4f-9b6c-799e25efb3fb	na					uuid:824f5d54-5a9c-4d4f-9b6c-799e25efb3fb	help_family					uuid:824f5d54-5a9c-4d4f-9b6c-799e25efb3fb	n/a					uuid:824f5d54-5a9c-4d4f-9b6c-799e25efb3fb
uuid:8289948c-5702-44a6-9c23-372754dedfb9	yes	no	1	yes	na	2723	md	mikrob li bay maladi a	female	na	No	home	yes	home	1	40	Yes	40_49	yes	yes	999	yes	not_too_far	yes	uuid:8289948c-5702-44a6-9c23-372754dedfb9	dk					uuid:8289948c-5702-44a6-9c23-372754dedfb9	action					uuid:8289948c-5702-44a6-9c23-372754dedfb9	na_already_convinced					uuid:8289948c-5702-44a6-9c23-372754dedfb9	unknown					uuid:8289948c-5702-44a6-9c23-372754dedfb9
uuid:82d91d21-3ff6-4a5b-abb6-4ab514e17253	dk	no	2	yes	yes	457	va		female	na	Some_secondary	post	yes	post	3	18	Yes	18_29	yes	yes	999	no	close	yes	uuid:82d91d21-3ff6-4a5b-abb6-4ab514e17253	pregnant					uuid:82d91d21-3ff6-4a5b-abb6-4ab514e17253	na					uuid:82d91d21-3ff6-4a5b-abb6-4ab514e17253	na_already_convinced					uuid:82d91d21-3ff6-4a5b-abb6-4ab514e17253	unknown					uuid:82d91d21-3ff6-4a5b-abb6-4ab514e17253
uuid:82fe7ac1-5616-4a90-86f4-19fa2df5b008	yes	no	1	yes	yes	265	Vd		female	na	Primary	post	yes	post	1	45	Yes	40_49	yes	yes	999	no	close	yes	uuid:82fe7ac1-5616-4a90-86f4-19fa2df5b008	dk					uuid:82fe7ac1-5616-4a90-86f4-19fa2df5b008	na					uuid:82fe7ac1-5616-4a90-86f4-19fa2df5b008	na_already_convinced					uuid:82fe7ac1-5616-4a90-86f4-19fa2df5b008	bednets					uuid:82fe7ac1-5616-4a90-86f4-19fa2df5b008
uuid:8310a630-94a8-44e8-8f4c-bcc9ddcd19f8	other	dk	3	dk	na	151	cb	lel te bwel premye fwa a li te fel pa byen	female	dk	Primary	na	no	na	2	23	Yes	18_29	yes	na	999	na	dk	no	uuid:8310a630-94a8-44e8-8f4c-bcc9ddcd19f8	pregnant					uuid:8310a630-94a8-44e8-8f4c-bcc9ddcd19f8	na					uuid:8310a630-94a8-44e8-8f4c-bcc9ddcd19f8	side_effect					uuid:8310a630-94a8-44e8-8f4c-bcc9ddcd19f8	unknown					uuid:8310a630-94a8-44e8-8f4c-bcc9ddcd19f8
uuid:833c9db2-fda9-4a09-9ba7-28d4a150b1d7	yes	no	4	yes	yes	2556	J.a	Hhf	male	na	Primary	post	yes	post	3	40	Yes	40_49	yes	yes	999	no	close	yes	uuid:833c9db2-fda9-4a09-9ba7-28d4a150b1d7	pregnant					uuid:833c9db2-fda9-4a09-9ba7-28d4a150b1d7	na					uuid:833c9db2-fda9-4a09-9ba7-28d4a150b1d7	na_already_convinced					uuid:833c9db2-fda9-4a09-9ba7-28d4a150b1d7	unknown					uuid:833c9db2-fda9-4a09-9ba7-28d4a150b1d7
uuid:8396bc62-b8b9-4d87-9ee4-0145b9785ba6	yes	no	5	yes	yes	167	Ij		female	na	Primary	post	yes	post	2	42	Yes	40_49	yes	yes	999	no	close	yes	uuid:8396bc62-b8b9-4d87-9ee4-0145b9785ba6	pregnant					uuid:8396bc62-b8b9-4d87-9ee4-0145b9785ba6	na					uuid:8396bc62-b8b9-4d87-9ee4-0145b9785ba6	help_me					uuid:8396bc62-b8b9-4d87-9ee4-0145b9785ba6	bednets					uuid:8396bc62-b8b9-4d87-9ee4-0145b9785ba6
uuid:83cddf28-2ccb-4328-be2b-ba3e689c4ee4	yes	no	3	yes	yes	120	Pa	Li te fel rann ve	female	1	Primary	post	no	post	2	46	No	40_49	yes	yes	999	no	close	yes	uuid:83cddf28-2ccb-4328-be2b-ba3e689c4ee4	pregnant					uuid:83cddf28-2ccb-4328-be2b-ba3e689c4ee4	dk					uuid:83cddf28-2ccb-4328-be2b-ba3e689c4ee4	help_family					uuid:83cddf28-2ccb-4328-be2b-ba3e689c4ee4	unknown					uuid:83cddf28-2ccb-4328-be2b-ba3e689c4ee4
uuid:83f17875-f9fc-4b1d-bc17-a2d50cc6d21e	yes	no	3	yes	yes	122	Vjb	Jdg	male	1	No	post	yes	post	3	50	Yes	50_59	yes	yes	999	yes	close	yes	uuid:83f17875-f9fc-4b1d-bc17-a2d50cc6d21e	pregnant					uuid:83f17875-f9fc-4b1d-bc17-a2d50cc6d21e	dk					uuid:83f17875-f9fc-4b1d-bc17-a2d50cc6d21e	side_effect					uuid:83f17875-f9fc-4b1d-bc17-a2d50cc6d21e	unknown					uuid:83f17875-f9fc-4b1d-bc17-a2d50cc6d21e
uuid:83f5fb5f-c2d7-4ab1-a996-247ad4aacfa5	dk	dk	2	yes	na	2754	cs	d4 li pat bwe medicament paske yo te d'il li pat bon pou li	female	na	No	na	yes	na	2	86	Yes	80_89	yes	na	999	na	dk	no	uuid:83f5fb5f-c2d7-4ab1-a996-247ad4aacfa5	dk					uuid:83f5fb5f-c2d7-4ab1-a996-247ad4aacfa5	na					uuid:83f5fb5f-c2d7-4ab1-a996-247ad4aacfa5	na_already_convinced					uuid:83f5fb5f-c2d7-4ab1-a996-247ad4aacfa5	unknown					uuid:83f5fb5f-c2d7-4ab1-a996-247ad4aacfa5
uuid:8413bf39-3522-42a3-ab39-a6546e1fa8cf	yes	no	1	yes	yes	252	Gp		female	na	Finish_primary	na	yes	post	3	30	Yes	30_39	yes	no	999	na	close	yes	uuid:8413bf39-3522-42a3-ab39-a6546e1fa8cf	pregnant					uuid:8413bf39-3522-42a3-ab39-a6546e1fa8cf	na					uuid:8413bf39-3522-42a3-ab39-a6546e1fa8cf	na_already_convinced					uuid:8413bf39-3522-42a3-ab39-a6546e1fa8cf	clean_water					uuid:8413bf39-3522-42a3-ab39-a6546e1fa8cf
uuid:84cd06fe-f796-4752-804a-3cc719f6f495	yes	no	2	yes	yes	952	fw		female	na	Primary	post	yes	post	3	20	Yes	18_29	yes	yes	999	yes	close	yes	uuid:84cd06fe-f796-4752-804a-3cc719f6f495	pregnant					uuid:84cd06fe-f796-4752-804a-3cc719f6f495	dk					uuid:84cd06fe-f796-4752-804a-3cc719f6f495	uk					uuid:84cd06fe-f796-4752-804a-3cc719f6f495	unknown					uuid:84cd06fe-f796-4752-804a-3cc719f6f495
uuid:84dd3de3-987a-4e1b-911b-28936b275277	yes	no	1	yes	yes	585	Dr	Coulevre ki bay li	female	na	No	post	yes	post	2	54	Yes	50_59	yes	yes	999	yes	close	yes	uuid:84dd3de3-987a-4e1b-911b-28936b275277	pregnant					uuid:84dd3de3-987a-4e1b-911b-28936b275277	not_eat					uuid:84dd3de3-987a-4e1b-911b-28936b275277	na_already_convinced					uuid:84dd3de3-987a-4e1b-911b-28936b275277	unknown					uuid:84dd3de3-987a-4e1b-911b-28936b275277
uuid:84ec1ba8-01d3-4349-927a-b5a8a4d2c947	yes	no	2	yes	yes	98	gc		female	na	No	post	yes	post	3	35	Yes	30_39	yes	yes	999	yes	close	yes	uuid:84ec1ba8-01d3-4349-927a-b5a8a4d2c947	pregnant					uuid:84ec1ba8-01d3-4349-927a-b5a8a4d2c947	dk					uuid:84ec1ba8-01d3-4349-927a-b5a8a4d2c947	uk					uuid:84ec1ba8-01d3-4349-927a-b5a8a4d2c947	unknown					uuid:84ec1ba8-01d3-4349-927a-b5a8a4d2c947
uuid:84ffec05-a1d3-411f-89c1-e94f95e0a51b	yes	no	5	yes	yes	2720	Mg		female	na	Finish_primary	school	yes	school	3	20	Yes	18_29	yes	yes	999	no	other	yes	uuid:84ffec05-a1d3-411f-89c1-e94f95e0a51b	pregnant					uuid:84ffec05-a1d3-411f-89c1-e94f95e0a51b	na					uuid:84ffec05-a1d3-411f-89c1-e94f95e0a51b	na_already_convinced					uuid:84ffec05-a1d3-411f-89c1-e94f95e0a51b	clean_water					uuid:84ffec05-a1d3-411f-89c1-e94f95e0a51b
uuid:85049b57-183e-4a12-8349-7468fc18a046	na_not_aware_of_post	dk	5	yes	na	295	Gk		female	na	Primary	na	dk	na	0	60	No	60_69	no	na	999	na	na_not_aware_post	no	uuid:85049b57-183e-4a12-8349-7468fc18a046	dk					uuid:85049b57-183e-4a12-8349-7468fc18a046	na					uuid:85049b57-183e-4a12-8349-7468fc18a046	help_me					uuid:85049b57-183e-4a12-8349-7468fc18a046	n/a					uuid:85049b57-183e-4a12-8349-7468fc18a046
uuid:85248e48-f8cc-46f4-b9a6-43e8232ca9a5	yes	no	5	yes	yes	2680	Mk		female	na	Some_secondary	school	yes	school	2	25	Yes	18_29	yes	yes	999	no	other	yes	uuid:85248e48-f8cc-46f4-b9a6-43e8232ca9a5	pregnant					uuid:85248e48-f8cc-46f4-b9a6-43e8232ca9a5	na					uuid:85248e48-f8cc-46f4-b9a6-43e8232ca9a5	help_me					uuid:85248e48-f8cc-46f4-b9a6-43e8232ca9a5	clean_water					uuid:85248e48-f8cc-46f4-b9a6-43e8232ca9a5
uuid:856c42f1-0456-4ac5-8482-c62b362bca0d	dk	dk	2	yes	na	916	kg		male	na	Primary	na	yes	na	2	22	Yes	18_29	yes	na	999	na	dk	no	uuid:856c42f1-0456-4ac5-8482-c62b362bca0d	pregnant					uuid:856c42f1-0456-4ac5-8482-c62b362bca0d	na					uuid:856c42f1-0456-4ac5-8482-c62b362bca0d	na_already_convinced					uuid:856c42f1-0456-4ac5-8482-c62b362bca0d	unknown					uuid:856c42f1-0456-4ac5-8482-c62b362bca0d
uuid:85769500-3244-4068-aa33-5294dc346d77	yes	no	4	yes	yes	166	E l		male	na	No	post	yes	post	2	48	Yes	40_49	yes	yes	999	no	close	yes	uuid:85769500-3244-4068-aa33-5294dc346d77	pregnant					uuid:85769500-3244-4068-aa33-5294dc346d77	na					uuid:85769500-3244-4068-aa33-5294dc346d77	help_me					uuid:85769500-3244-4068-aa33-5294dc346d77	unknown					uuid:85769500-3244-4068-aa33-5294dc346d77
uuid:857b6133-a4a4-47ac-89ea-025c6a7fa695	yes	no	1	yes	yes	593	Na		female	na	Primary	post	yes	post	1	20	Yes	18_29	yes	yes	999	yes	close	yes	uuid:857b6133-a4a4-47ac-89ea-025c6a7fa695	pregnant					uuid:857b6133-a4a4-47ac-89ea-025c6a7fa695	dk					uuid:857b6133-a4a4-47ac-89ea-025c6a7fa695	na_already_convinced					uuid:857b6133-a4a4-47ac-89ea-025c6a7fa695	unknown					uuid:857b6133-a4a4-47ac-89ea-025c6a7fa695
uuid:8587b05f-375c-499a-8674-1c80ec62bc0c	yes	dk	4	yes	yes	356	Dj	Ok	female	na	No	post	yes	post	2	54	Yes	50_59	yes	yes	999	yes	close	yes	uuid:8587b05f-375c-499a-8674-1c80ec62bc0c	pregnant					uuid:8587b05f-375c-499a-8674-1c80ec62bc0c	na					uuid:8587b05f-375c-499a-8674-1c80ec62bc0c	help_me					uuid:8587b05f-375c-499a-8674-1c80ec62bc0c	clean_water					uuid:8587b05f-375c-499a-8674-1c80ec62bc0c
uuid:859be2f6-d16f-4029-8db6-07eae6b8cb37	yes	no	1	yes	yes	11	Mmc		female	na	Primary	post	yes	post	2	999	Yes	60_69	yes	yes	999	no	close	yes	uuid:859be2f6-d16f-4029-8db6-07eae6b8cb37	pregnant					uuid:859be2f6-d16f-4029-8db6-07eae6b8cb37	na					uuid:859be2f6-d16f-4029-8db6-07eae6b8cb37	uk					uuid:859be2f6-d16f-4029-8db6-07eae6b8cb37	iftreat					uuid:859be2f6-d16f-4029-8db6-07eae6b8cb37
uuid:85c283fa-8004-40a8-b2cf-90961337880d	yes	no	3	yes	yes	160	oc	htjcc	female	1	Finish_primary	post	yes	post	3	24	No	18_29	yes	yes	999	no	not_too_far	yes	uuid:85c283fa-8004-40a8-b2cf-90961337880d	pregnant					uuid:85c283fa-8004-40a8-b2cf-90961337880d	na					uuid:85c283fa-8004-40a8-b2cf-90961337880d	help_me					uuid:85c283fa-8004-40a8-b2cf-90961337880d	other					uuid:85c283fa-8004-40a8-b2cf-90961337880d
uuid:85debe90-173f-4999-95e6-d50ab5c2886f	yes	no	2	yes	yes	51	ao		female	na	Some_secondary	post	yes	post	2	26	Yes	18_29	yes	yes	999	yes	close	yes	uuid:85debe90-173f-4999-95e6-d50ab5c2886f	pregnant					uuid:85debe90-173f-4999-95e6-d50ab5c2886f	dk					uuid:85debe90-173f-4999-95e6-d50ab5c2886f	uk					uuid:85debe90-173f-4999-95e6-d50ab5c2886f	unknown					uuid:85debe90-173f-4999-95e6-d50ab5c2886f
uuid:866c1fd9-336f-482c-9e5e-8e71fa421689	yes	no	5	yes	yes	315	Pt		female	na	Finish_primary	post	yes	post	3	32	Yes	30_39	yes	yes	999	no	close	yes	uuid:866c1fd9-336f-482c-9e5e-8e71fa421689	dk					uuid:866c1fd9-336f-482c-9e5e-8e71fa421689	na					uuid:866c1fd9-336f-482c-9e5e-8e71fa421689	side_effect					uuid:866c1fd9-336f-482c-9e5e-8e71fa421689	bednets					uuid:866c1fd9-336f-482c-9e5e-8e71fa421689
uuid:867615ad-cd24-4f49-a994-f431f8841736	yes	no	2	yes	yes	2760	et		male	na	No	post	yes	post	2	66	Yes	60_69	yes	yes	999	no	close	yes	uuid:867615ad-cd24-4f49-a994-f431f8841736	pregnant					uuid:867615ad-cd24-4f49-a994-f431f8841736	na					uuid:867615ad-cd24-4f49-a994-f431f8841736	na_already_convinced					uuid:867615ad-cd24-4f49-a994-f431f8841736	clean_water					uuid:867615ad-cd24-4f49-a994-f431f8841736
uuid:8679137c-4307-47a9-a05a-33bb5faab035	yes	no	4	yes	yes	202	E p		female	na	No	post	yes	post	1	76	Yes	70_79	yes	yes	999	no	not_too_far	yes	uuid:8679137c-4307-47a9-a05a-33bb5faab035	Sick					uuid:8679137c-4307-47a9-a05a-33bb5faab035	na					uuid:8679137c-4307-47a9-a05a-33bb5faab035	help_me					uuid:8679137c-4307-47a9-a05a-33bb5faab035	unknown					uuid:8679137c-4307-47a9-a05a-33bb5faab035
uuid:86ae6e0f-edcd-4fd8-8b93-ee2d21def75d	yes	no	3	yes	yes	868	Cc	Hrf	male	1	Some_secondary	post	yes	school	3	19	Yes	18_29	yes	yes	999	yes	not_too_far	yes	uuid:86ae6e0f-edcd-4fd8-8b93-ee2d21def75d	pregnant					uuid:86ae6e0f-edcd-4fd8-8b93-ee2d21def75d	dk					uuid:86ae6e0f-edcd-4fd8-8b93-ee2d21def75d	help_family					uuid:86ae6e0f-edcd-4fd8-8b93-ee2d21def75d	clean_water					uuid:86ae6e0f-edcd-4fd8-8b93-ee2d21def75d
uuid:86b0a3a7-8860-449c-ab78-e2914b7d19bf	yes	no	1	yes	yes	588	mm		female	na	No	post	yes	post	2	80	Yes	80_89	yes	yes	999	no	not_too_far	yes	uuid:86b0a3a7-8860-449c-ab78-e2914b7d19bf	dk					uuid:86b0a3a7-8860-449c-ab78-e2914b7d19bf	na					uuid:86b0a3a7-8860-449c-ab78-e2914b7d19bf	na_already_convinced					uuid:86b0a3a7-8860-449c-ab78-e2914b7d19bf	iftreat					uuid:86b0a3a7-8860-449c-ab78-e2914b7d19bf
uuid:86d98db9-8a2e-4f6a-974f-7854c21339b3	yes	no	1	yes	yes	22	Ep		male	na	Some_secondary	post	yes	post	1	18	Yes	18_29	yes	yes	999	yes	not_too_far	yes	uuid:86d98db9-8a2e-4f6a-974f-7854c21339b3	pregnant					uuid:86d98db9-8a2e-4f6a-974f-7854c21339b3	action					uuid:86d98db9-8a2e-4f6a-974f-7854c21339b3	na_already_convinced					uuid:86d98db9-8a2e-4f6a-974f-7854c21339b3	clean_water					uuid:86d98db9-8a2e-4f6a-974f-7854c21339b3
uuid:87132812-09bd-4235-b0ab-4477034e98fa	yes	no	1	yes	yes	591	Dj		female	na	Some_secondary	school	yes	school	2	18	Yes	18_29	yes	yes	999	no	close	yes	uuid:87132812-09bd-4235-b0ab-4477034e98fa	dk					uuid:87132812-09bd-4235-b0ab-4477034e98fa	na					uuid:87132812-09bd-4235-b0ab-4477034e98fa	na_already_convinced					uuid:87132812-09bd-4235-b0ab-4477034e98fa	clean_water					uuid:87132812-09bd-4235-b0ab-4477034e98fa
uuid:871baf98-1620-4829-803a-f91167ea9f02	yes	no	5	yes	yes	1022	Jl		female	na	No	post	yes	post	1	60	Yes	60_69	yes	yes	999	no	close	yes	uuid:871baf98-1620-4829-803a-f91167ea9f02	dk					uuid:871baf98-1620-4829-803a-f91167ea9f02	na					uuid:871baf98-1620-4829-803a-f91167ea9f02	help_me					uuid:871baf98-1620-4829-803a-f91167ea9f02	bednets					uuid:871baf98-1620-4829-803a-f91167ea9f02
uuid:8720ac52-9d31-4555-be85-accc2c45700d	yes	no	5	yes	yes	402	sd		male	na	No	post	yes	post	3	55	Yes	50_59	yes	yes	999	yes	close	yes	uuid:8720ac52-9d31-4555-be85-accc2c45700d	pregnant					uuid:8720ac52-9d31-4555-be85-accc2c45700d	dk					uuid:8720ac52-9d31-4555-be85-accc2c45700d	help_me					uuid:8720ac52-9d31-4555-be85-accc2c45700d	clean_water					uuid:8720ac52-9d31-4555-be85-accc2c45700d
uuid:872fc61a-c63a-4ebb-a853-fc4fbff789aa	yes	no	3	yes	no	540	Pr	Hfh	male	1	Finish_primary	home	no	post	1	20	No	18_29	yes	yes	999	yes	close	yes	uuid:872fc61a-c63a-4ebb-a853-fc4fbff789aa	pregnant					uuid:872fc61a-c63a-4ebb-a853-fc4fbff789aa	action					uuid:872fc61a-c63a-4ebb-a853-fc4fbff789aa	help_family					uuid:872fc61a-c63a-4ebb-a853-fc4fbff789aa	clean_water					uuid:872fc61a-c63a-4ebb-a853-fc4fbff789aa
uuid:8795fb20-9ec4-4e4b-8f56-6d487a481ed5	yes	no	4	yes	yes	368	R.p	Yyf	female	na	No	post	yes	post	3	27	Yes	18_29	yes	yes	999	no	not_too_far	yes	uuid:8795fb20-9ec4-4e4b-8f56-6d487a481ed5	pregnant					uuid:8795fb20-9ec4-4e4b-8f56-6d487a481ed5	na					uuid:8795fb20-9ec4-4e4b-8f56-6d487a481ed5	uk					uuid:8795fb20-9ec4-4e4b-8f56-6d487a481ed5	mosquito					uuid:8795fb20-9ec4-4e4b-8f56-6d487a481ed5
uuid:87ab09a0-5738-439d-aa6e-4a0a9d95c824	yes	no	5	yes	yes	291	Es		female	na	Some_secondary	post	yes	post	3	20	Yes	18_29	yes	yes	999	no	close	yes	uuid:87ab09a0-5738-439d-aa6e-4a0a9d95c824	pregnant					uuid:87ab09a0-5738-439d-aa6e-4a0a9d95c824	na					uuid:87ab09a0-5738-439d-aa6e-4a0a9d95c824	side_effect					uuid:87ab09a0-5738-439d-aa6e-4a0a9d95c824	clean_water					uuid:87ab09a0-5738-439d-aa6e-4a0a9d95c824
uuid:87b728cf-0a6b-4bcb-bc5a-31481e25e172	yes	no	5	yes	yes	328	Sj		female	na	Primary	post	yes	post	2	20	Yes	18_29	yes	yes	999	no	close	yes	uuid:87b728cf-0a6b-4bcb-bc5a-31481e25e172	pregnant					uuid:87b728cf-0a6b-4bcb-bc5a-31481e25e172	na					uuid:87b728cf-0a6b-4bcb-bc5a-31481e25e172	uk					uuid:87b728cf-0a6b-4bcb-bc5a-31481e25e172	clean_water					uuid:87b728cf-0a6b-4bcb-bc5a-31481e25e172
uuid:87d45bad-c84e-4e67-9148-b2d4887b2f83	yes	dk	4	dk	yes	361	D.s	Oj	female	na	No	post	yes	post	2	73	Yes	70_79	yes	yes	999	yes	close	yes	uuid:87d45bad-c84e-4e67-9148-b2d4887b2f83	pregnant					uuid:87d45bad-c84e-4e67-9148-b2d4887b2f83	dk					uuid:87d45bad-c84e-4e67-9148-b2d4887b2f83	help_me					uuid:87d45bad-c84e-4e67-9148-b2d4887b2f83	bednets					uuid:87d45bad-c84e-4e67-9148-b2d4887b2f83
uuid:880940b4-9ec1-47df-aa6f-8bb34dbd67bc	yes	no	5	yes	yes	250	Fv		female	na	Some_secondary	post	yes	post	3	22	Yes	18_29	yes	yes	999	no	not_too_far	yes	uuid:880940b4-9ec1-47df-aa6f-8bb34dbd67bc	dk					uuid:880940b4-9ec1-47df-aa6f-8bb34dbd67bc	na					uuid:880940b4-9ec1-47df-aa6f-8bb34dbd67bc	help_me					uuid:880940b4-9ec1-47df-aa6f-8bb34dbd67bc	n/a					uuid:880940b4-9ec1-47df-aa6f-8bb34dbd67bc
uuid:8828505d-68e4-4281-b936-685a587436ea	dk	dk	2	yes	na	78	rf		female	na	No	na	yes	na	3	45	Yes	40_49	yes	na	999	na	dk	no	uuid:8828505d-68e4-4281-b936-685a587436ea	dk					uuid:8828505d-68e4-4281-b936-685a587436ea	na					uuid:8828505d-68e4-4281-b936-685a587436ea	uk					uuid:8828505d-68e4-4281-b936-685a587436ea	unknown					uuid:8828505d-68e4-4281-b936-685a587436ea
uuid:8831de83-41ce-45a9-a87c-d111cc140718	yes	no	1	yes	yes	286	We		female	na	Finish_secondary	home	yes	post	3	22	Yes	18_29	yes	yes	999	no	not_too_far	yes	uuid:8831de83-41ce-45a9-a87c-d111cc140718	pregnant					uuid:8831de83-41ce-45a9-a87c-d111cc140718	na					uuid:8831de83-41ce-45a9-a87c-d111cc140718	na_already_convinced					uuid:8831de83-41ce-45a9-a87c-d111cc140718	clean_water					uuid:8831de83-41ce-45a9-a87c-d111cc140718
uuid:8848511f-7ffd-462b-9cc1-c77e111a7f8b	yes	no	3	yes	yes	150	Ie	Cdf	male	1	Some_secondary	post	yes	post	3	50	Yes	50_59	yes	yes	999	no	not_too_far	yes	uuid:8848511f-7ffd-462b-9cc1-c77e111a7f8b	pregnant					uuid:8848511f-7ffd-462b-9cc1-c77e111a7f8b	na					uuid:8848511f-7ffd-462b-9cc1-c77e111a7f8b	help_me					uuid:8848511f-7ffd-462b-9cc1-c77e111a7f8b	iftreat					uuid:8848511f-7ffd-462b-9cc1-c77e111a7f8b
uuid:8871fd3e-1f14-44cd-8e55-622061dd1c54	yes	no	4	yes	yes	169	N c		female	na	Primary	post	yes	post	1	38	Yes	30_39	yes	yes	999	no	not_too_far	yes	uuid:8871fd3e-1f14-44cd-8e55-622061dd1c54	pregnant					uuid:8871fd3e-1f14-44cd-8e55-622061dd1c54	na					uuid:8871fd3e-1f14-44cd-8e55-622061dd1c54	help_me					uuid:8871fd3e-1f14-44cd-8e55-622061dd1c54	clean_water					uuid:8871fd3e-1f14-44cd-8e55-622061dd1c54
uuid:8896721e-95de-415f-a64f-5181ae2db0c9	dk	dk	2	yes	na	316	md		female	na	No	na	no	na	999	64	Yes	60_69	yes	na	999	na	dk	no	uuid:8896721e-95de-415f-a64f-5181ae2db0c9	pregnant					uuid:8896721e-95de-415f-a64f-5181ae2db0c9	na					uuid:8896721e-95de-415f-a64f-5181ae2db0c9	help_me					uuid:8896721e-95de-415f-a64f-5181ae2db0c9	unknown					uuid:8896721e-95de-415f-a64f-5181ae2db0c9
uuid:88d951c1-3941-4104-9f21-5dc9259091ff	yes	no	3	yes	yes	500	jd	gsfx	male	1	Finish_primary	home	yes	home	3	40	Yes	40_49	yes	yes	999	no	close	yes	uuid:88d951c1-3941-4104-9f21-5dc9259091ff	pregnant					uuid:88d951c1-3941-4104-9f21-5dc9259091ff	na					uuid:88d951c1-3941-4104-9f21-5dc9259091ff	help_me					uuid:88d951c1-3941-4104-9f21-5dc9259091ff	iftreat					uuid:88d951c1-3941-4104-9f21-5dc9259091ff
uuid:88e0f503-1850-4077-bb30-d984f863bb84	yes	no	2	yes	yes	2842	ti		male	na	Some_secondary	post	yes	post	2	45	Yes	40_49	yes	yes	999	no	close	yes	uuid:88e0f503-1850-4077-bb30-d984f863bb84	pregnant					uuid:88e0f503-1850-4077-bb30-d984f863bb84	na					uuid:88e0f503-1850-4077-bb30-d984f863bb84	na_already_convinced					uuid:88e0f503-1850-4077-bb30-d984f863bb84	unknown					uuid:88e0f503-1850-4077-bb30-d984f863bb84
uuid:88e19746-f8b2-46fc-86ab-c69a19ae2d11	na_not_aware_of_post	no	4	yes	na	387	E.s	Gyy	female	na	Some_secondary	na	no	na	999	30	Yes	30_39	yes	no	5	na	na_not_aware_post	no	uuid:88e19746-f8b2-46fc-86ab-c69a19ae2d11	pregnant					uuid:88e19746-f8b2-46fc-86ab-c69a19ae2d11	na					uuid:88e19746-f8b2-46fc-86ab-c69a19ae2d11	side_effect					uuid:88e19746-f8b2-46fc-86ab-c69a19ae2d11	clean_water					uuid:88e19746-f8b2-46fc-86ab-c69a19ae2d11
uuid:890b7f82-7d58-441c-93e6-3e556739b3e1	yes	no	1	yes	yes	2604	mm		male	na	Some_secondary	post	yes	post	2	44	Yes	40_49	yes	yes	999	no	not_too_far	yes	uuid:890b7f82-7d58-441c-93e6-3e556739b3e1	pregnant					uuid:890b7f82-7d58-441c-93e6-3e556739b3e1	na					uuid:890b7f82-7d58-441c-93e6-3e556739b3e1	na_already_convinced					uuid:890b7f82-7d58-441c-93e6-3e556739b3e1	clean_water					uuid:890b7f82-7d58-441c-93e6-3e556739b3e1
[truncated: 839 more rows]
[truncated: 35 more columns]
